# Supplementary material for: The diversity and consistency of what and when people eat
Source: Research Square preprint supplement (doi:10.21203/rs.3.rs-6149642/v1), 2025-08-05
Supplement: Supplementary file 1 [file 494c1ed837aac2f86fc432d8.xlsx]

## Sheet: Table S12
Table S12: Rank Order of Food and Beverages Logged
item	Food Type	No of times logged	No. of people who logged at least once	TF50	00:00-2:00	02:00-4:00	04:00-6:00	06:00-8:00	08:00-10:00	10:00-12:00	12:00-14:00	14:00-16:00	16:00-18:00	18:00-20:00	20:00-22:00	22:00-24:00
coffee	b	192257	15091	09:41:00	460	647	6787	39087	57343	36050	20230	14723	8463	4727	2709	1031
tea	b	64324	8730	13:00:00	387	109	780	6815	11326	9012	7962	7621	6889	6389	5169	1865
cheese	f	55332	13200	14:34:00	436	145	230	2302	5889	6476	10538	6297	7100	9749	4762	1408
egg	f	55022	13432	10:54:00	186	64	468	6118	14786	11878	8900	3436	2832	4046	1869	439
salad	f	54547	13994	15:50:00	312	118	85	416	979	4018	15829	6263	7120	13821	4809	777
milk	b	53919	7018	11:06:00	365	123	878	7553	12978	8619	6041	5136	4323	3910	2784	1209
banana	f	46555	10911	11:45:00	225	125	495	4511	10015	9073	6640	5123	4440	3394	1837	677
chicken	f	45907	13301	16:54:00	356	137	74	422	938	3464	11230	4955	6398	12582	4544	807
bread	f	42013	9644	13:39:00	296	76	188	2703	6247	5424	7362	4107	4535	6827	3380	868
apple	f	35842	9861	13:45:00	174	84	169	1643	4313	5584	6871	5665	4916	3927	1937	559
rice	f	35228	11033	16:35:00	231	101	70	517	1231	2441	8524	3947	4408	9153	3880	725
chocolate	f	31962	9227	16:10:00	252	90	142	716	1880	2817	4823	5074	4647	5660	4455	1406
tomato	f	31876	8716	14:30:00	199	41	53	901	2504	3419	7729	3547	3676	6629	2666	512
yogurt	f	31214	7876	12:18:00	178	75	216	3179	6668	4830	4247	2870	2634	3564	2124	629
avocado	f	29390	8344	13:19:00	133	44	113	1430	3706	4352	7051	3161	2972	4434	1658	336
black coffee	b	29369	2938	09:16:00	64	107	1492	6794	9268	5455	2729	1771	885	473	252	79
butter	f	26160	6755	12:37:00	154	51	259	2359	5177	3957	3802	2196	2544	3759	1490	412
beer	b	23436	5781	18:54:00	448	118	74	114	165	324	1490	2021	4138	7354	5171	2019
carrot	f	23381	7797	15:36:00	143	54	47	410	848	2115	5702	3053	3565	5330	1794	320
cream	b	22751	4218	10:30:00	67	54	750	3965	5454	3624	2498	1796	1421	1797	1007	318
almond	f	22573	6293	13:44:00	112	66	166	1243	3143	3520	3630	3361	3077	2442	1324	489
potato	f	22240	9158	17:05:00	133	42	32	365	1036	1926	4426	2180	3126	6360	2235	379
blueberry	f	21379	5876	11:31:00	83	44	166	2229	5034	3970	2917	1880	1663	2027	1062	304
toast	f	20994	6391	10:39:00	85	46	194	2720	5816	4030	2909	1345	1203	1547	806	293
broccoli	f	20665	8004	17:26:00	107	31	35	304	678	1441	4234	1886	3257	6607	1809	276
green tea	b	19655	3870	12:02:00	92	57	278	2073	3870	3522	2836	2454	1845	1407	907	314
peanut butter	f	19551	5815	13:08:00	133	82	191	1592	3214	3006	2880	2395	2255	2025	1291	487
spinach	f	19301	6269	13:45:00	89	28	55	893	2137	2590	4332	1927	2208	3573	1265	204
pizza	f	17188	8813	18:02:00	166	56	40	159	380	889	2717	1533	2662	5390	2582	614
bacon	f	17163	6778	11:34:00	64	29	99	1457	3970	3695	3038	1111	1136	1776	628	160
chip	f	16298	7309	17:03:00	162	46	27	108	275	1039	3121	2237	2929	3793	1880	681
pasta	f	15750	7154	17:35:00	151	34	18	90	189	863	3554	1691	2165	4787	1850	358
cookie	f	15695	5884	15:42:00	147	80	59	379	1024	1704	2460	2534	2308	2601	1760	639
soup	f	15055	6414	15:00:00	109	25	26	99	303	1119	4715	1971	1982	3287	1175	244
onion	f	14762	5025	16:11:00	61	20	20	362	914	1404	2994	1548	2132	3734	1349	224
cake	f	14531	6277	15:58:00	116	31	39	348	992	1412	2183	2320	2256	2590	1749	495
oatmeal	f	14337	3753	09:27:00	30	17	220	2722	5465	2851	1165	584	473	480	243	87
herbal tea	b	14291	2614	15:22:00	107	30	133	904	1666	1731	1525	1709	1591	1907	2228	760
mushroom	f	14217	5779	15:19:00	66	19	33	548	1167	1559	2774	1353	1742	3532	1211	213
almond milk	b	14125	2696	10:26:00	63	40	272	2247	3752	2607	1582	1048	890	848	568	208
wine	b	14099	4024	19:17:00	195	55	50	90	108	111	470	685	2122	5178	3796	1239
sandwich	f	13810	5928	13:24:00	111	37	49	514	1328	1855	4054	1783	1356	1657	796	270
cucumber	f	13577	4611	14:29:00	85	29	45	361	875	1400	3538	1720	1734	2581	1021	188
strawberry	f	13474	5010	13:28:00	62	27	66	972	2231	1959	1968	1508	1386	1948	1084	263
salmon	f	13461	6440	17:05:00	49	25	31	237	596	1027	2891	1309	1828	3955	1305	208
red wine	b	13296	3748	19:20:00	151	33	20	62	74	63	333	525	1901	5408	3661	1065
sausage	f	13277	6035	13:18:00	79	20	84	846	2188	1946	2107	972	1454	2563	822	196
ice cream	f	13262	6244	18:48:00	150	46	31	58	121	316	1133	1728	1947	3709	3093	930
orange	f	12806	4636	14:00:00	66	51	53	579	1501	1866	2384	1838	1544	1651	981	292
bean	f	12664	5598	15:22:00	80	13	21	253	642	1130	3182	1462	1767	2865	1040	209
cracker	f	12359	4917	15:46:00	143	60	33	203	586	1316	2324	1906	2227	2036	1059	466
beef	f	12300	5327	16:45:00	85	49	35	218	432	942	2725	1337	1851	3177	1162	287
hummus	f	12163	4509	14:58:00	91	34	26	246	606	1194	3065	1826	1892	2131	809	243
oat	f	12117	2820	10:14:00	50	16	178	1664	3726	2506	1407	850	648	628	337	107
ham	f	11927	4619	13:15:00	70	23	56	713	1775	1698	2532	1204	1224	1636	777	219
honey	b	11872	3620	11:24:00	83	30	180	1505	2784	1893	1335	1011	943	1101	716	291
dark chocolate	f	11776	3149	15:52:00	86	32	44	251	622	1089	2028	1952	1582	2226	1520	344
walnut	f	10844	3110	12:49:00	40	33	60	896	1900	1758	1806	1339	1165	1176	510	161
smoothie	b	10635	3077	11:16:00	31	15	84	1255	2572	2074	1566	1050	902	712	282	92
sweet potato	f	10345	4378	16:57:00	45	13	30	224	535	816	2106	1021	1591	2966	893	105
sugar	f	10256	2020	11:00:00	54	17	237	1416	2420	1792	1211	1058	807	682	407	155
black tea	b	10111	1754	11:33:00	56	27	128	1246	2319	1638	1356	1154	906	660	467	154
kale	f	10075	3157	14:00:00	44	14	48	402	972	1307	2302	1122	1262	1891	599	112
olive oil	f	9864	2567	14:42:00	55	23	29	298	704	998	2363	1103	1155	2142	816	178
steak	f	9743	5251	18:00:00	55	24	11	96	258	573	1528	850	1457	3432	1244	215
cereal	f	9413	2986	10:04:00	92	42	160	1698	2736	1505	658	475	533	633	607	274
cauliflower	f	9382	4264	17:21:00	46	12	12	103	283	638	1982	959	1446	2935	846	120
grape	f	9329	3736	14:23:00	76	38	41	405	980	1256	1721	1260	1263	1270	771	248
green	f	9082	3233	13:51:00	46	16	67	524	979	1085	1970	951	993	1679	656	116
fish	f	8956	4649	17:26:00	57	19	17	113	236	482	1879	1024	1215	2531	1158	225
peanut	f	8646	3407	15:30:00	75	33	30	261	613	978	1363	1457	1481	1239	808	308
pork	f	8377	3888	16:46:00	49	11	17	121	268	703	1910	851	1202	2283	791	171
lettuce	f	8327	3084	14:54:00	48	16	5	71	266	656	2545	1079	1013	1804	682	142
granola	f	8143	2506	10:38:00	34	14	113	995	2296	1581	944	618	557	553	346	92
lemon	f	8127	2742	13:10:00	48	22	184	1070	1163	925	1095	826	775	1119	675	225
juice	b	8075	2683	13:00:00	59	21	105	808	1366	1061	1241	885	800	975	561	193
biscuit	f	7979	3196	14:06:00	47	17	71	512	1075	1181	1082	1039	1095	1024	623	213
turkey	f	7838	3494	14:30:00	58	24	40	160	409	857	2094	1081	1070	1457	455	133
pepper	f	7773	3233	15:23:00	47	10	24	222	569	798	1647	805	1034	1868	647	102
protein shake	b	7692	1799	12:23:00	26	12	99	758	1404	1332	1077	909	835	713	433	94
popcorn	f	7344	3850	17:42:00	94	39	18	41	161	409	824	1127	1248	1489	1433	461
raspberry	f	7337	2847	12:41:00	18	10	63	670	1358	1143	1071	726	683	964	514	117
latte	b	7325	1895	10:52:00	16	11	97	859	1887	1591	1122	857	488	227	133	37
curry	f	7266	3340	17:33:00	36	17	18	64	146	381	1672	769	858	2127	1025	153
cashew	f	7207	2555	14:37:00	44	23	28	251	661	1015	1298	1140	1104	999	480	164
cabbage	f	7174	3019	16:06:00	33	7	16	86	257	634	1717	834	1041	1843	593	113
olive	f	7141	3080	16:00:00	55	22	15	144	298	642	1564	898	1082	1553	700	168
soy milk	b	6983	951	10:38:00	22	11	106	968	1906	1213	828	599	558	402	278	92
porridge	f	6956	1741	09:12:00	13	2	67	1325	3006	1338	534	169	179	180	112	31
greek yogurt	f	6945	1889	12:35:00	39	10	56	552	1360	1165	1007	660	647	860	458	131
roll	f	6824	3329	14:18:00	35	10	19	197	644	764	1616	787	879	1236	501	136
creamer	b	6818	825	09:10:00	24	44	391	1681	2087	1150	543	362	223	175	94	44
coconut	f	6794	2530	14:26:00	26	17	52	379	788	882	1069	854	877	1139	567	144
corn	f	6780	3641	17:12:00	39	18	9	82	262	566	1305	702	1146	1851	667	133
garlic	f	6772	2533	16:56:00	61	18	37	209	411	618	1135	694	911	1802	673	203
kombucha	b	6754	1954	14:56:00	25	12	42	275	580	780	1222	1029	1128	1075	473	113
cinnamon	f	6745	1965	11:06:00	54	26	99	754	1746	1230	772	587	506	501	343	127
pancake	f	6732	3762	11:08:00	17	6	27	548	1750	1570	905	441	465	626	280	97
pea	f	6722	3386	17:09:00	39	18	10	101	207	452	1439	696	1111	1919	628	102
oat milk	b	6597	946	10:40:00	14	10	73	893	1808	1280	842	665	441	316	198	57
tofu	f	6478	2502	15:54:00	41	8	12	107	342	590	1491	725	884	1668	529	81
tuna	f	6364	3500	14:30:00	29	16	8	86	216	567	1966	938	739	1140	545	114
burger	f	6345	4095	17:31:00	51	15	17	31	82	366	1320	730	964	1831	759	179
ginger	f	6253	2019	13:25:00	43	13	83	536	908	860	970	638	657	891	492	162
lentil	f	6234	2561	15:30:00	39	12	12	96	180	477	1657	845	821	1380	603	112
zucchini	f	6223	2865	16:51:00	38	10	14	120	255	529	1327	662	896	1683	599	90
espresso	b	6185	1021	10:33:00	19	23	186	1139	1398	1098	819	756	386	178	129	54
chili	f	6141	3212	17:07:00	45	8	11	71	175	461	1370	591	996	1786	519	108
green bean	f	6022	3331	17:53:00	22	16	11	54	79	394	1060	502	1005	2202	602	75
white wine	b	5986	1959	19:14:00	62	14	8	32	30	44	229	341	886	2344	1530	466
bagel	f	5966	2650	10:40:00	26	24	70	703	1659	1330	962	392	312	280	151	57
salsa	f	5957	2909	16:01:00	37	12	20	176	359	615	1106	685	1003	1376	451	117
flax	f	5889	1342	10:54:00	29	8	77	747	1559	1133	817	395	410	439	198	77
mayonnaise	f	5884	2452	14:19:00	43	10	10	144	325	630	1642	789	726	1059	408	98
quinoa	f	5820	2464	15:02:00	38	13	21	117	308	478	1558	702	742	1306	434	103
pear	f	5819	2535	13:40:00	35	9	21	302	821	841	1075	818	700	694	392	111
mango	f	5794	2656	14:15:00	40	15	19	307	726	768	951	754	715	876	490	133
muffin	f	5788	2578	12:00:00	28	12	62	575	1207	1050	855	630	531	487	236	115
protein bar	f	5746	1657	13:40:00	26	20	52	350	721	952	931	949	843	512	293	97
noodle	f	5744	3158	17:03:00	49	13	10	44	147	384	1323	661	810	1543	617	143
cherry	f	5611	2121	14:33:00	29	20	35	246	629	731	937	739	755	823	491	176
omelette	f	5575	2885	11:33:00	10	4	33	451	1331	1197	1062	340	297	533	266	51
stevia	b	5510	676	10:41:00	25	25	189	826	1393	847	622	526	397	380	205	75
cottage cheese	f	5503	1812	13:02:00	27	11	30	388	915	797	1014	627	596	701	281	116
celery	f	5497	2190	14:34:00	45	18	34	152	334	646	1287	839	828	933	283	98
shrimp	f	5450	3217	17:45:00	35	15	8	31	77	340	1048	519	859	1784	637	97
peach	f	5445	2161	13:53:00	28	17	31	295	718	759	957	693	650	738	442	117
raisin	f	5332	1890	12:00:00	39	25	40	521	1172	930	681	563	472	489	292	108
kefir	b	5298	1237	12:28:00	25	9	28	516	1057	859	717	500	574	583	328	102
taco	f	5248	3056	17:29:00	41	27	21	96	218	379	911	466	864	1542	543	140
diet coke	b	5212	1186	14:57:00	29	17	17	163	282	566	1178	790	784	798	438	150
scrambled egg	f	5169	2491	10:23:00	13	5	35	599	1616	1258	779	231	160	320	122	31
date	f	5152	1690	14:19:00	20	7	31	234	621	733	811	749	748	715	374	109
muesli	f	5123	1334	09:40:00	10	8	47	993	1759	910	434	280	290	233	125	34
cappuccino	b	5097	1148	10:56:00	9	1	43	475	1321	1297	776	603	307	145	94	26
candy	f	5066	2043	16:15:00	63	25	17	51	165	416	761	1005	811	806	676	270
orange juice	b	5042	2063	11:21:00	18	11	95	628	1174	861	653	386	384	464	286	82
spaghetti	f	4883	2992	17:49:00	26	18	10	34	57	242	894	448	888	1696	476	94
pineapple	f	4856	2337	13:55:00	18	14	26	279	605	693	846	575	544	775	392	89
almond butter	f	4856	1537	12:56:00	27	14	42	391	891	760	651	596	573	523	290	98
chia seed	f	4853	1342	10:30:00	26	3	52	596	1443	995	630	366	275	265	152	50
coconut milk	b	4769	1311	11:33:00	15	6	84	593	1104	741	622	450	395	469	233	57
watermelon	f	4738	2036	15:25:00	37	15	19	153	370	518	833	669	681	835	450	158
chicken breast	f	4734	1883	16:31:00	31	19	19	66	102	357	1122	555	715	1237	427	84
brown rice	f	4699	1912	16:49:00	22	7	6	41	118	355	1170	495	650	1396	360	79
cream cheese	f	4667	2172	12:06:00	23	9	28	401	1017	836	736	425	423	473	224	72
sauce	f	4641	2529	17:05:00	33	10	12	69	176	382	987	458	679	1283	465	87
jam	f	4634	1966	11:03:00	24	8	54	535	1189	834	605	373	372	347	210	83
asparagus	f	4614	2586	18:00:00	26	3	12	72	161	263	707	376	709	1719	498	68
coconut oil	f	4606	956	10:30:00	9	22	132	746	1196	668	550	385	297	400	155	46
mixed nut	f	4498	1321	14:42:00	38	21	15	134	401	617	815	812	759	534	260	92
apple cider vinegar	b	4482	951	11:58:00	37	32	154	692	845	559	597	330	366	430	305	135
fry	f	4430	2788	17:00:00	26	12	10	29	91	305	985	573	636	1137	481	145
wrap	f	4387	2249	13:43:00	20	7	16	124	319	483	1380	609	479	643	251	56
guacamole	f	4310	2243	16:21:00	31	17	9	69	203	408	825	548	726	989	390	95
tortilla	f	4216	1983	14:50:00	30	11	16	155	377	532	793	490	546	813	371	82
chickpea	f	4187	1858	15:25:00	23	7	2	27	127	311	1164	577	587	991	311	60
pecan	f	4116	1599	13:58:00	16	14	32	221	569	538	707	552	552	536	281	98
black bean	f	4088	1797	15:26:00	24	6	7	59	153	443	1039	438	578	967	312	62
pistachio	f	4052	1652	15:30:00	35	6	10	133	244	484	644	697	738	595	342	124
salt	f	4042	1068	13:28:00	30	15	87	387	555	465	685	472	446	545	258	97
bulletproof coffee	b	4037	512	09:08:00	4	20	159	1047	1281	724	389	209	103	68	22	11
brussel sprout	f	4012	2053	17:31:00	22	13	5	78	156	276	699	392	638	1340	345	48
vegetable soup	f	3964	1777	15:19:00	12	2	7	27	54	326	1175	522	552	911	328	48
croissant	f	3929	2180	10:57:00	19	6	22	332	1094	931	515	342	265	240	126	37
shake	b	3904	1242	12:20:00	33	15	34	450	738	600	594	414	379	420	166	61
pumpkin seed	f	3886	1226	12:59:00	12	7	26	256	667	602	694	454	478	419	219	52
pumpkin	f	3852	1685	14:36:00	21	4	12	187	410	381	759	444	455	806	319	54
iced tea	b	3808	1171	14:11:00	23	12	21	167	237	488	920	558	484	546	267	85
hamburger	f	3762	2369	17:38:00	18	9	6	16	54	208	731	387	655	1131	474	73
boiled egg	f	3697	1483	12:00:00	14	8	37	322	784	702	786	319	248	281	162	34
beet	f	3656	1589	14:48:00	18	5	15	97	225	373	930	389	520	788	255	41
pie	f	3628	2123	17:08:00	39	9	16	71	194	265	618	410	477	909	515	105
soda	b	3600	1340	17:00:00	44	18	15	76	117	252	598	489	586	752	468	185
meatball	f	3591	2174	17:27:00	19	9	7	37	50	216	734	415	576	1148	322	58
brownie	f	3554	1952	16:31:00	27	10	9	70	177	283	542	534	540	739	502	121
cheddar cheese	f	3551	1325	15:00:00	19	11	12	99	293	391	726	476	516	685	250	73
pretzel	f	3544	1788	15:52:00	37	6	6	32	136	377	652	607	697	509	347	138
squash	f	3542	1468	16:56:00	21	11	12	101	158	298	675	356	521	972	340	77
kiwifruit	f	3521	1370	12:55:00	19	8	16	261	590	585	617	402	392	373	209	49
coke	b	3511	1323	16:35:00	56	18	6	26	110	214	753	490	534	680	460	164
bun	f	3466	1817	14:52:00	33	4	16	132	328	408	655	404	483	694	238	71
sunflower seed	f	3446	1105	13:16:00	28	18	28	239	573	459	611	412	371	419	216	72
sushi	f	3445	2391	17:15:00	25	6	6	19	42	190	813	400	474	892	489	89
mashed potato	f	3418	2195	18:00:00	19	10	4	24	39	216	591	285	532	1256	371	71
pickle	f	3387	1797	15:23:00	20	6	7	48	140	291	874	438	513	661	312	77
salami	f	3363	1554	14:33:00	29	8	9	80	254	460	721	437	489	528	263	85
potato chip	f	3330	1686	16:24:00	45	16	5	18	59	259	769	464	550	581	403	161
lamb	f	3295	1798	17:57:00	17	3	2	26	68	159	621	367	426	1099	442	65
sauerkraut	f	3229	1196	14:19:00	12	8	6	79	281	351	808	382	426	632	194	50
cocoa	b	3202	1111	13:39:00	28	21	23	270	526	410	433	387	313	415	285	91
lemonade	b	3175	1488	16:14:00	22	8	11	53	145	250	581	494	481	682	337	111
tortilla chip	f	3151	1568	17:01:00	28	7	4	13	69	197	603	427	587	747	358	111
sour cream	f	3124	1505	16:55:00	32	8	1	59	152	260	555	350	539	810	282	76
donut	f	3106	1871	12:34:00	17	15	22	194	621	568	438	387	329	259	189	67
chicken salad	f	3066	1782	14:10:00	10	4	5	23	49	280	1115	432	373	558	184	33
fried egg	f	3055	1464	10:52:00	9	3	27	303	827	719	463	184	132	257	104	27
beetroot	f	3051	1252	14:23:00	10	1	27	81	185	230	878	415	357	634	201	32
bell pepper	f	3022	1068	14:45:00	28	7	5	84	235	309	726	330	419	625	205	49
parmesan	f	3009	1540	17:17:00	19	3	2	58	94	211	554	358	486	865	283	76
protein powder	b	2984	689	11:39:00	10	5	52	344	640	526	397	294	276	227	157	56
fries	f	2955	1896	17:18:00	24	14	6	12	23	179	661	379	418	770	366	103
blackberry	f	2921	1231	12:45:00	17	7	25	240	527	477	456	309	292	371	145	55
red pepper	f	2881	1181	15:18:00	23	10	6	54	154	279	686	362	391	680	203	33
chia	f	2871	946	11:03:00	9	6	23	323	777	543	416	247	221	208	82	16
waffle	f	2806	1605	11:12:00	13	8	31	315	670	558	329	196	229	277	136	44
lasagna	f	2792	1728	17:31:00	24	3	4	20	59	198	564	266	439	861	304	50
cranberry	f	2785	1132	13:21:00	24	6	21	194	459	373	471	316	318	350	171	82
hard boiled egg	f	2763	1027	11:57:00	25	10	22	247	551	569	581	286	200	167	74	31
french fries	f	2754	1799	17:17:00	19	10	5	4	16	138	620	342	464	696	341	99
mozzarella	f	2744	1478	15:47:00	22	7	7	50	171	241	572	357	372	615	267	63
feta	f	2741	1338	14:05:00	12	9	3	82	196	294	770	299	363	500	176	37
brazil nut	f	2732	702	13:11:00	12	6	21	150	375	500	487	379	361	282	126	33
hot dog	f	2706	1733	16:33:00	25	10	4	33	75	213	566	372	439	635	247	87
lemon water	b	2705	567	10:01:00	10	6	138	567	640	340	244	193	193	207	127	40
burrito	f	2687	1687	15:35:00	34	11	15	63	159	272	594	288	356	593	245	57
plum	f	2682	1139	13:59:00	14	8	10	124	315	417	477	402	337	338	193	47
cherry tomato	f	2612	910	14:25:00	17	2	8	48	157	292	707	335	325	492	199	30
rice cake	f	2596	873	15:00:00	19	5	11	90	209	318	478	395	424	361	209	77
goat cheese	f	2586	1176	14:16:00	17	3	8	91	263	299	576	288	310	503	184	44
rye bread	f	2585	658	13:00:00	18	7	5	162	455	381	519	280	263	308	145	42
cheeseburger	f	2541	1668	17:17:00	24	5	3	11	22	156	574	298	434	658	279	77
coke zero	b	2508	534	15:29:00	23	16	25	68	116	215	529	387	383	441	208	97
stew	f	2505	1305	17:15:00	23	5	6	18	47	152	585	264	379	733	251	42
green salad	f	2503	984	16:52:00	14	3	1	19	32	157	647	305	332	687	265	41
coleslaw	f	2495	1456	17:02:00	12	7	2	15	26	134	668	282	382	736	195	36
chocolate chip cookie	f	2486	1234	16:30:00	26	8	5	34	88	206	422	390	367	468	373	99
pesto	f	2480	1419	16:30:00	16	4	3	30	79	204	573	300	313	672	241	45
matcha	b	2473	721	11:08:00	5	8	68	326	548	472	377	278	178	144	55	14
hot chocolate	b	2471	1234	15:40:00	24	16	26	92	232	286	279	384	325	345	335	127
dressing	f	2459	1156	15:28:00	7	2	2	9	46	186	740	292	369	611	171	24
grapefruit	f	2457	1026	12:30:00	12	8	28	240	466	386	367	272	229	268	133	48
stir fry	f	2456	1381	17:57:00	11	9	5	20	43	113	487	216	363	903	251	35
kimchi	f	2425	850	14:53:00	12	2	11	47	182	244	579	279	306	538	180	45
caffeine	b	2418	398	10:20:00	12	20	129	411	577	399	345	218	146	85	48	28
cheddar	f	2403	1178	14:56:00	16	5	10	38	183	276	565	265	379	430	182	54
green smoothie	b	2398	615	11:21:00	22	9	31	224	553	507	378	252	191	153	63	15
lime	f	2385	945	15:07:00	16	2	38	146	214	219	411	248	293	447	276	75
eggplant	f	2372	1324	17:10:00	22	2	1	28	44	158	521	292	319	631	297	57
hazelnut	f	2351	808	13:35:00	15	6	35	137	381	329	375	289	295	274	165	50
gin	b	2320	991	19:08:00	52	11	5	15	19	9	71	92	435	849	555	207
cheese sandwich	f	2318	1167	13:11:00	19	9	11	90	231	342	703	300	217	237	108	51
sourdough bread	f	2312	700	13:25:00	18	10	5	126	348	295	501	257	237	344	140	31
dip	f	2295	1347	16:33:00	28	5	3	8	33	191	474	315	471	465	220	82
vinegar	b	2268	808	13:46:00	13	3	25	215	226	211	487	223	292	407	135	31
white rice	f	2264	959	17:21:00	8	3	2	25	54	153	476	258	307	671	266	41
tomato sauce	f	2260	1283	17:14:00	19	2	2	18	49	146	557	235	274	679	244	35
radish	f	2228	998	14:26:00	8	0	0	70	168	244	552	254	279	461	158	34
lemon juice	b	2201	638	12:09:00	13	6	50	337	379	302	335	170	191	248	131	39
vodka	b	2199	843	19:07:00	59	17	7	31	34	41	87	122	369	693	515	224
whole milk	b	2193	428	10:52:00	18	8	17	365	525	342	231	205	154	169	112	47
peppermint tea	b	2173	586	14:53:00	14	9	18	128	263	254	271	298	222	282	330	84
granola bar	f	2161	981	13:26:00	23	12	21	104	307	374	356	393	289	141	88	53
pudding	f	2137	1161	17:09:00	13	11	12	38	134	167	311	246	304	537	290	74
fig	f	2126	817	14:11:00	17	4	10	73	290	292	364	296	299	278	166	37
caramel	f	2111	1123	15:56:00	18	15	17	79	136	196	290	350	280	354	293	83
sardine	f	2106	1046	14:00:00	12	5	14	34	144	259	600	311	280	300	124	23
mixed vegetable	f	2101	948	17:23:00	23	3	2	22	44	140	478	187	340	626	186	50
ketchup	f	2082	1088	15:35:00	13	4	8	68	162	227	373	232	296	521	154	24
egg white	f	2082	661	10:20:00	9	7	21	276	641	448	240	124	121	106	74	15
tangerine	f	2072	765	14:02:00	13	4	3	74	203	318	425	346	270	241	130	45
trail mix	f	2067	850	14:47:00	19	7	1	41	178	292	363	430	324	215	138	59
hash brown	f	2064	1332	10:18:00	12	4	19	240	629	572	263	57	81	126	41	20
mandarin	f	2063	747	14:19:00	9	5	11	68	190	285	415	340	306	249	133	52
sourdough	f	2046	688	12:50:00	12	2	63	104	334	320	458	210	178	241	100	24
macadamia nut	f	2039	654	14:56:00	14	9	9	67	171	267	355	334	341	259	162	51
whiskey	b	2031	862	20:11:00	90	24	4	14	15	14	41	57	245	564	621	342
nacho	f	2024	1442	18:11:00	18	6	1	14	16	86	267	184	367	618	335	112
coconut water	b	2022	794	14:18:00	22	5	21	101	245	271	327	275	278	271	146	60
pastry	f	2018	1092	13:33:00	8	3	6	85	335	335	305	260	254	252	128	47
chamomile tea	b	2014	645	19:26:00	25	7	28	97	145	160	107	125	134	332	612	242
arugula	f	2000	765	14:50:00	9	4	4	38	110	211	513	233	253	440	165	20
wheat	f	1994	842	13:48:00	15	9	19	111	297	264	326	243	219	283	160	48
mint	f	1987	969	15:10:00	26	7	11	69	161	212	331	328	292	303	183	64
melon	f	1987	930	13:38:00	17	1	5	110	317	272	345	244	196	286	148	46
gravy	f	1949	1253	17:30:00	7	1	2	39	123	142	307	174	310	660	155	29
baked potato	f	1947	1310	18:01:00	13	5	1	10	18	103	319	167	317	729	230	35
earl grey	b	1930	430	12:30:00	7	6	9	194	377	327	225	288	206	141	115	35
fried rice	f	1921	1221	17:14:00	12	6	4	16	64	133	428	207	250	535	234	32
ground beef	f	1910	835	16:24:00	13	3	3	24	77	182	380	241	354	458	150	25
english muffin	f	1910	839	10:09:00	7	6	44	305	559	436	230	86	81	91	52	13
dal	f	1908	607	16:02:00	8	7	2	16	58	124	432	320	157	394	343	47
clementine	f	1900	677	14:10:00	6	8	5	75	180	257	402	308	285	207	122	45
buckwheat	f	1891	617	13:19:00	7	7	7	112	308	273	358	206	219	239	126	29
skimmed milk	b	1890	158	11:32:00	11	4	22	184	454	340	267	203	143	146	83	33
ginger tea	b	1882	637	14:02:00	16	4	19	143	267	260	244	235	247	201	168	78
bone broth	f	1878	613	13:58:00	18	9	18	114	220	260	329	242	233	297	106	32
cacao	f	1876	542	12:47:00	9	7	26	169	346	289	259	205	212	187	116	51
maple syrup	b	1870	848	10:45:00	5	7	13	172	558	422	204	123	111	160	74	21
smoked salmon	f	1861	978	13:10:00	12	2	8	99	241	285	451	213	147	276	106	21
quesadilla	f	1860	1182	16:55:00	28	4	5	28	73	181	366	180	284	416	221	74
chicken soup	f	1860	1027	15:42:00	18	0	1	12	37	143	490	273	263	442	150	31
pita	f	1844	956	14:52:00	13	4	1	42	119	171	460	273	239	348	131	43
heavy cream	b	1842	294	10:00:00	3	12	57	367	487	339	194	99	100	108	54	22
caesar salad	f	1839	1176	17:29:00	10	2	4	6	17	117	436	170	282	579	191	25
chocolate chip	f	1792	796	15:46:00	21	12	8	43	141	235	233	255	258	312	196	78
feta cheese	f	1788	792	14:58:00	7	0	2	30	107	164	467	234	219	384	141	33
chocolate cake	f	1787	1139	17:18:00	10	4	5	27	48	116	242	282	255	411	306	81
vegetable burger	f	1763	1000	17:00:00	6	1	7	36	35	119	389	214	249	504	166	37
pork chop	f	1759	1186	18:09:00	13	4	3	13	29	88	247	116	328	682	203	33
syrup	b	1756	742	11:18:00	10	5	39	210	382	330	246	125	116	158	91	44
dumpling	f	1747	1140	16:49:00	7	2	1	12	38	132	424	180	249	467	198	37
whey protein	b	1740	383	12:34:00	5	4	16	156	310	306	257	167	172	214	98	35
cheesecake	f	1727	1101	17:49:00	9	2	2	18	68	119	205	224	260	403	333	84
jelly	f	1711	908	13:02:00	15	5	25	133	278	277	240	171	199	188	140	40
mac and cheese	f	1699	1166	17:25:00	12	2	3	14	32	127	343	166	276	516	170	38
potato salad	f	1698	1110	16:52:00	9	8	2	13	32	113	424	183	251	485	152	26
banana bread	f	1689	802	13:55:00	12	2	4	92	246	262	252	252	206	202	111	48
quiche	f	1679	993	13:43:00	7	0	4	64	163	233	412	153	183	309	129	22
flaxseed	f	1675	345	10:09:00	7	3	20	240	526	350	217	103	80	89	30	10
mint tea	b	1667	577	15:47:00	14	6	7	59	178	179	207	229	209	236	242	101
falafel	f	1652	1052	14:48:00	7	3	2	10	35	114	528	251	182	355	135	30
scone	f	1651	940	12:29:00	4	2	2	68	314	353	312	234	175	114	53	20
chicken sandwich	f	1639	1160	14:30:00	16	4	4	17	35	159	524	224	192	297	131	36
red onion	f	1616	628	15:25:00	5	0	5	17	74	127	442	171	203	418	125	29
rooibos tea	b	1608	359	14:52:00	8	2	15	96	219	182	188	234	214	216	173	61
rib	f	1604	1105	18:00:00	11	10	3	12	18	64	245	150	301	576	181	33
mocha	b	1596	606	11:22:00	5	3	9	169	359	348	253	195	130	66	45	14
chicken wing	f	1595	1102	18:02:00	12	6	1	7	27	73	241	166	256	514	242	50
cider	b	1588	706	18:08:00	17	7	13	61	88	54	143	149	251	430	262	113
apricot	f	1586	747	14:00:00	7	5	4	105	216	203	259	217	218	199	124	29
sprout	f	1571	649	13:55:00	10	0	0	73	161	197	360	177	178	290	101	24
chicken thigh	f	1570	771	17:42:00	14	4	1	12	27	96	270	166	266	538	151	25
nectarine	f	1556	694	14:00:00	8	12	5	77	190	218	284	273	198	177	97	17
prawn	f	1543	951	18:02:00	2	4	1	14	14	66	304	177	174	513	249	25
chai	b	1540	479	12:14:00	5	4	16	152	327	253	189	213	187	118	54	22
pomegranate	f	1530	640	13:38:00	9	5	15	77	240	215	246	191	167	227	105	33
diet pepsi	b	1516	307	14:28:00	7	11	26	60	128	175	321	182	213	216	141	36
spread	f	1502	538	12:44:00	9	2	20	138	250	228	237	168	151	208	70	21
chocolate bar	f	1493	799	16:01:00	16	9	3	6	33	109	279	309	240	238	171	80
ghee	f	1486	353	11:08:00	7	5	44	188	367	249	190	101	85	152	73	25
corn chip	f	1472	781	16:48:00	8	4	2	21	27	113	252	214	320	319	139	53
tomato soup	f	1470	958	15:22:00	11	6	0	13	15	115	437	198	217	343	98	17
leek	f	1461	752	16:50:00	7	3	0	35	49	84	347	172	192	428	124	20
prune	f	1448	492	13:02:00	3	3	21	136	279	189	177	149	158	189	105	39
baked bean	f	1443	907	15:01:00	6	1	4	37	135	158	303	127	219	349	93	11
turkey sandwich	f	1435	834	13:23:00	17	6	3	7	29	193	609	184	154	142	72	19
avocado toast	f	1434	741	10:50:00	1	0	17	150	387	305	271	114	70	81	31	7
cupcake	f	1431	929	16:17:00	19	5	3	26	65	120	217	243	219	274	183	57
lentil soup	f	1430	821	14:44:00	10	0	0	12	23	116	455	193	201	316	87	17
chai tea	b	1419	443	12:48:00	6	1	12	103	281	243	188	191	165	131	78	20
basil	f	1408	737	15:22:00	6	1	2	31	67	147	311	194	161	341	128	19
cocktail	b	1404	655	18:45:00	26	8	5	34	55	55	89	93	211	418	300	110
fried chicken	f	1401	948	17:21:00	13	7	1	7	25	100	290	170	183	372	191	42
ramen	f	1401	937	16:23:00	14	3	0	9	36	102	339	197	148	332	177	44
americano	b	1400	308	10:15:00	3	0	39	239	358	284	190	147	84	28	14	14
papaya	f	1400	536	12:00:00	4	2	7	123	322	247	203	112	122	152	76	30
apple juice	b	1399	668	14:17:00	15	6	6	102	178	180	210	148	187	223	109	35
couscous	f	1395	834	17:03:00	6	4	2	10	19	64	374	158	186	415	135	22
parsley	f	1388	555	14:26:00	17	4	2	48	155	147	291	163	146	267	119	29
splenda	b	1387	192	09:56:00	2	19	73	270	352	217	150	95	88	70	36	15
tahini	f	1386	509	15:00:00	12	10	10	39	124	170	276	149	180	267	123	26
risotto	f	1373	909	17:59:00	8	1	1	10	11	50	306	130	179	474	180	23
cod	f	1371	893	17:44:00	5	2	4	34	50	92	232	123	213	441	158	17
fruit salad	f	1367	693	13:10:00	3	0	9	56	178	244	290	151	127	205	84	20
white bread	f	1359	502	13:58:00	11	4	19	82	171	181	228	161	148	196	128	30
courgette	f	1359	598	17:46:00	4	2	1	10	22	62	319	140	166	464	155	14
chicken curry	f	1354	793	18:00:00	5	3	0	9	10	64	267	140	181	469	176	30
chocolate milk	b	1342	505	14:04:00	20	9	20	108	159	194	182	138	147	169	133	63
chorizo	f	1340	770	14:37:00	4	3	8	43	141	172	252	154	152	253	121	37
hemp seed	f	1335	384	11:42:00	3	1	14	136	280	263	241	96	102	119	68	12
edamame	f	1333	754	16:26:00	9	1	1	9	28	90	350	157	215	302	147	24
liver	f	1309	504	13:21:00	15	1	7	120	190	137	271	127	113	205	83	40
tuna salad	f	1307	825	13:53:00	8	3	2	12	28	151	475	228	133	184	64	19
ranch	f	1304	681	15:40:00	12	7	4	9	23	128	352	144	204	308	86	27
coconut yogurt	b	1303	420	12:55:00	3	1	15	76	250	209	201	120	124	179	106	19
tart	f	1302	735	16:52:00	7	2	6	31	79	102	197	180	181	260	208	49
starbucks	b	1302	589	11:49:00	7	6	22	99	278	266	224	170	103	70	43	14
pepperoni	f	1296	657	15:57:00	8	8	5	16	46	139	243	201	220	260	110	40
white coffee	b	1284	152	10:48:00	4	2	28	169	311	298	197	132	64	42	29	8
bolognese	f	1283	805	18:00:00	4	0	0	3	5	66	260	97	200	494	135	19
margarita	b	1281	773	18:39:00	11	2	0	6	6	13	70	108	239	515	232	79
garlic bread	f	1273	955	18:23:00	7	12	3	4	22	38	149	83	211	542	180	22
artichoke	f	1261	753	17:02:00	6	3	2	27	32	99	235	172	185	331	140	29
cashew nut	f	1260	453	14:26:00	8	2	7	54	131	166	233	169	186	175	90	39
baguette	f	1256	691	14:46:00	6	2	8	36	88	123	289	177	169	251	89	18
seaweed	f	1252	601	14:54:00	12	0	1	29	95	145	248	208	189	201	99	25
casserole	f	1252	658	17:30:00	3	3	1	18	48	97	242	99	203	428	95	15
poached egg	f	1247	689	10:53:00	3	1	10	124	365	290	254	73	35	59	27	6
string cheese	f	1236	451	13:45:00	17	7	4	37	121	213	257	196	166	105	75	38
kale salad	f	1233	625	15:57:00	7	3	1	2	20	100	351	145	168	331	92	13
cantaloupe	f	1230	599	13:23:00	8	3	14	91	167	178	219	148	145	187	55	15
roti	f	1219	383	16:05:00	8	1	0	16	56	98	228	206	75	244	258	29
paprika	f	1215	401	14:44:00	7	2	4	58	119	163	202	129	199	233	79	20
white tea	b	1207	224	12:40:00	1	2	5	114	258	173	171	175	112	96	71	29
energy drink	b	1201	297	11:38:00	9	12	61	129	229	210	174	142	114	69	32	20
roast beef	f	1200	764	15:30:00	8	4	3	14	31	106	313	155	179	281	85	21
vegetable salad	f	1194	504	15:04:00	7	0	1	19	44	123	314	133	186	258	97	12
rice cracker	f	1168	481	15:40:00	10	3	7	24	80	117	203	182	237	176	95	34
pepsi	b	1166	423	15:32:00	17	3	5	31	89	103	225	156	155	206	126	50
whole wheat bread	f	1164	315	12:52:00	2	3	8	97	198	171	246	128	115	129	51	16
naan	f	1158	762	18:03:00	5	5	3	21	35	65	201	98	132	384	182	27
butternut squash	f	1156	603	17:00:00	9	2	1	15	48	88	253	112	194	339	85	10
jalapeno	f	1155	618	15:19:00	7	5	12	35	77	115	228	158	164	234	89	31
mixed salad	f	1152	410	15:08:00	11	0	2	8	14	88	372	121	141	263	109	23
skim milk	b	1151	171	10:30:00	10	2	19	199	298	166	127	84	76	96	51	23
spirulina	f	1150	254	11:57:00	6	0	28	114	240	196	179	109	102	84	56	36
cafe	b	1149	226	10:53:00	2	0	9	141	320	190	200	142	79	32	24	10
pop	b	1149	543	16:50:00	15	3	11	22	34	73	162	190	189	208	170	72
marmalade	f	1146	454	10:02:00	4	1	7	169	382	233	94	65	55	63	38	35
apple pie	f	1142	708	17:02:00	15	0	6	31	65	92	145	144	170	267	178	29
red cabbage	f	1139	503	15:39:00	7	2	2	30	48	77	289	142	151	289	84	18
ravioli	f	1135	817	17:53:00	7	2	2	5	13	50	241	92	180	380	141	22
balsamic vinegar	f	1124	443	15:17:00	4	8	0	8	22	77	333	149	190	246	71	16
meatloaf	f	1122	642	17:16:00	8	1	2	13	22	107	246	74	199	338	96	16
flat white	b	1120	282	11:08:00	3	2	0	74	298	312	199	133	66	19	11	3
barley	f	1119	450	14:02:00	1	1	2	42	140	133	236	140	144	184	73	23
broccoli sprout	f	1112	306	13:12:00	2	0	11	72	147	158	229	149	133	145	44	22
rye	f	1111	421	13:08:00	10	3	1	58	200	168	211	111	137	126	69	17
fruit smoothie	b	1110	391	12:00:00	6	0	6	110	250	187	174	121	94	88	63	11
whipped cream	b	1108	518	15:54:00	4	14	13	91	118	112	98	128	131	232	133	34
chapati	f	1096	224	15:29:00	3	2	0	35	85	75	195	183	53	170	249	46
diet soda	b	1090	187	15:42:00	13	3	6	23	71	110	212	139	160	221	95	37
enchilada	f	1084	741	17:26:00	8	1	2	10	16	91	237	88	190	326	98	17
green juice	b	1068	360	12:08:00	3	0	8	84	227	198	171	124	116	89	38	10
licorice	f	1068	377	16:24:00	4	2	1	32	85	92	103	181	171	179	172	46
pre workout	b	1053	240	09:24:00	2	12	194	199	182	128	68	88	97	59	22	2
greek salad	f	1044	640	15:47:00	7	0	0	5	11	81	315	116	141	269	80	19
sesame	f	1043	580	14:50:00	6	1	0	27	97	121	209	152	147	175	91	17
heavy whipped cream	b	1039	129	09:47:00	5	7	44	202	304	190	111	80	39	34	19	4
multigrain	f	1036	373	12:50:00	3	1	2	72	179	178	182	87	113	135	64	20
alcohol	b	1033	389	19:00:00	27	6	4	3	7	11	57	73	166	345	232	102
chicken sausage	f	1032	521	13:03:00	4	3	7	85	154	150	209	76	98	186	52	8
curd	f	1028	292	14:14:00	2	0	2	45	133	79	205	210	84	128	118	22
blue cheese	f	1028	571	17:04:00	5	2	1	23	30	75	199	107	171	266	121	28
oreo	f	1021	590	17:41:00	17	7	6	12	28	64	131	143	144	203	194	72
coca cola	b	1018	398	16:53:00	13	5	0	10	29	69	181	154	168	186	149	54
spinach salad	f	1017	538	16:24:00	6	1	1	5	9	66	305	97	153	300	65	9
applesauce	f	1009	500	14:20:00	12	10	9	64	85	115	205	128	120	190	46	25
roast chicken	f	1005	595	17:59:00	8	2	4	10	10	37	203	89	151	369	105	17
rum	b	1001	428	19:25:00	34	14	0	4	11	23	37	59	143	293	258	125
wing	f	1000	685	18:04:00	7	4	2	4	16	48	146	96	163	336	132	46
gluten free bread	f	986	306	12:55:00	4	4	8	66	166	153	202	100	89	127	51	16
french toast	f	982	731	10:19:00	1	0	3	80	342	294	127	29	33	52	16	5
gouda	f	981	436	13:46:00	10	4	3	46	127	131	194	108	119	151	62	26
gatorade	b	975	407	15:11:00	18	4	11	31	99	108	166	125	142	155	67	49
paste	f	970	386	14:38:00	4	3	4	47	142	95	163	101	146	168	75	22
soy yogurt	f	968	250	12:20:00	2	2	2	68	272	116	144	83	95	106	65	13
mackerel	f	968	514	14:13:00	4	3	4	15	49	89	299	136	101	180	72	16
cheerio	f	968	375	10:10:00	13	10	21	173	267	139	74	50	65	58	67	31
macadamia	f	964	329	14:09:00	6	1	13	48	126	121	165	143	129	133	66	13
aubergine	f	960	497	17:55:00	4	3	1	5	13	50	223	113	83	295	147	23
sea salt	f	959	247	14:11:00	4	5	27	87	99	93	150	139	110	157	67	21
fennel	f	958	446	16:04:00	5	2	6	28	53	68	219	103	103	248	105	18
kind bar	f	956	404	13:30:00	6	0	13	42	122	165	168	176	126	77	39	22
soy sauce	f	956	512	17:05:00	10	5	3	15	31	61	206	104	142	273	91	15
champagne	b	955	532	18:46:00	23	10	2	2	17	24	76	86	167	291	181	76
peanut butter jelly	f	951	489	13:36:00	14	6	7	52	83	146	219	138	100	95	57	34
egg sandwich	f	951	623	11:02:00	3	0	6	102	235	208	202	70	55	43	21	6
half half	b	949	137	08:37:00	0	0	81	265	276	125	68	56	19	34	24	1
duck	f	947	612	16:34:00	3	0	2	12	43	63	218	116	105	253	116	16
cheese stick	f	943	454	14:10:00	9	3	8	30	78	156	180	172	142	97	50	18
pate	f	941	462	14:13:00	5	1	3	49	87	93	210	140	108	137	79	29
cornbread	f	939	563	17:11:00	6	2	3	20	57	71	169	82	158	265	84	22
mixed berry	f	936	336	11:57:00	8	1	4	90	195	183	133	83	74	92	53	20
prosecco	b	936	437	18:59:00	10	3	3	7	16	12	60	79	128	331	211	76
sweet tea	b	932	309	15:15:00	12	3	3	9	45	97	215	144	112	186	85	21
protein smoothie	b	932	272	11:32:00	2	0	3	93	212	187	139	99	79	73	39	6
sourdough toast	f	932	318	11:10:00	2	2	2	106	233	187	160	87	39	63	45	6
nutritional yeast	f	931	299	14:30:00	3	0	0	26	82	109	202	118	137	182	61	11
beef jerky	f	930	499	15:08:00	9	2	3	17	57	127	173	163	166	113	74	26
protein drink	b	926	273	12:12:00	2	4	7	97	139	204	127	104	97	84	51	10
halloumi	f	924	565	16:36:00	4	2	0	12	36	78	237	81	120	251	89	14
bran	f	922	274	09:23:00	10	0	18	216	303	149	67	39	38	49	20	13
patty	f	919	563	15:32:00	6	2	2	21	67	103	190	87	137	197	89	18
brie	f	918	490	15:28:00	6	0	1	29	63	90	185	122	125	180	94	23
nutella	f	918	483	15:12:00	10	4	11	50	123	107	104	97	127	134	102	49
crab	f	914	662	17:30:00	4	1	3	14	17	56	177	107	134	257	123	21
spring roll	f	914	718	17:35:00	3	4	2	8	10	43	182	98	152	287	107	18
chipotle	f	908	577	15:45:00	7	2	2	6	20	77	251	109	138	185	97	14
cilantro	f	907	447	15:27:00	10	5	1	23	57	88	219	84	127	217	62	14
apple cider	b	902	400	15:00:00	13	7	8	95	122	77	106	87	115	151	84	37
ham sandwich	f	901	563	13:17:00	4	0	1	25	59	113	332	131	93	88	38	17
spelt	f	900	251	13:00:00	3	6	1	49	157	151	186	83	79	130	45	10
instant coffee	b	899	138	10:42:00	2	0	17	131	216	196	122	88	55	37	26	9
fruit tea	b	892	219	13:41:00	6	3	14	88	123	122	112	114	85	115	88	22
pita bread	f	891	499	15:17:00	6	1	2	21	37	69	232	111	104	201	89	18
green pepper	f	888	422	14:41:00	3	6	2	15	51	96	231	103	90	187	83	21
hot tea	b	882	278	12:21:00	3	3	12	93	183	132	100	73	76	81	88	38
wholemeal	f	882	298	13:02:00	7	0	8	69	123	127	218	74	76	121	42	17
beef stew	f	881	522	17:33:00	7	2	2	9	16	57	170	82	150	295	77	14
chicken nugget	f	880	632	17:12:00	7	4	3	3	10	65	177	111	156	197	121	26
grilled cheese	f	880	678	16:07:00	7	2	4	14	16	70	212	116	140	197	66	36
whole grain bread	f	877	219	12:38:00	3	1	16	65	168	138	160	95	73	108	37	13
pulled pork	f	874	572	17:16:00	4	4	2	2	18	53	192	92	141	266	80	20
cauliflower rice	f	874	435	17:30:00	3	2	8	15	21	61	156	83	159	276	80	10
kebab	f	873	657	17:54:00	16	3	3	5	3	31	181	102	123	251	123	32
bulletproof	b	873	156	09:55:00	7	0	14	173	260	122	89	40	47	64	37	20
miso soup	b	870	537	15:37:00	4	5	1	25	42	78	203	102	96	202	94	18
custard	f	870	561	17:30:00	7	3	0	12	33	50	134	115	129	228	124	35
nut bar	f	868	360	14:02:00	0	0	3	30	81	152	165	159	137	93	35	13
marmite	f	866	318	12:23:00	7	2	6	53	202	149	131	88	84	75	45	24
sweet potato fry	f	864	664	17:55:00	2	3	1	4	8	36	182	75	139	287	116	11
dr pepper	b	862	284	15:47:00	7	8	6	26	46	68	185	109	134	155	91	27
milk chocolate	f	855	405	16:30:00	4	4	1	10	24	84	131	134	151	154	119	39
chocolate biscuit	f	855	358	15:32:00	7	1	3	14	49	95	128	172	135	123	92	36
gnocchi	f	855	620	17:51:00	5	1	0	4	7	43	196	90	107	280	106	16
mozzarella cheese	f	851	385	14:31:00	5	2	2	23	69	127	171	100	119	152	69	12
linseed	f	849	179	10:00:00	1	1	13	144	266	149	140	39	42	39	13	2
slaw	f	848	493	17:06:00	7	1	1	1	18	65	208	86	133	262	57	9
macaroni	f	847	575	17:45:00	6	2	3	4	13	46	156	82	158	250	109	18
breakfast burrito	f	843	496	09:58:00	5	2	17	101	304	222	101	28	24	26	9	4
loaf	f	842	410	14:38:00	7	0	6	46	81	102	152	99	117	147	62	23
corn tortilla	f	837	428	14:59:00	5	1	2	47	73	95	141	98	129	171	58	17
peppermint	f	836	331	14:44:00	5	3	5	46	95	106	106	132	92	125	92	29
vegan cheese	f	833	310	14:49:00	6	1	1	42	76	90	158	101	118	155	65	20
ranch dressing	f	833	446	16:00:00	8	2	1	4	7	69	244	91	157	194	46	10
bok choy	f	832	448	17:01:00	5	0	4	19	42	47	165	102	116	257	64	11
satsuma	f	828	298	14:30:00	6	3	1	16	67	99	196	147	115	106	58	14
ground turkey	f	823	321	16:29:00	6	4	7	15	27	68	184	85	118	225	70	14
herb tea	b	821	169	14:23:00	7	0	7	73	142	95	72	88	93	111	101	32
whey	b	818	200	12:25:00	7	0	6	89	154	132	108	92	87	75	59	9
corn flake	f	816	310	10:10:00	5	10	7	112	272	110	58	38	54	70	52	28
turkey bacon	f	812	368	11:01:00	2	1	9	72	204	205	142	64	46	46	18	3
millet	f	811	268	12:48:00	11	0	2	52	183	113	143	92	66	87	48	14
pizza slice	f	811	544	17:52:00	8	3	3	6	16	55	123	97	111	225	123	41
fajita	f	805	572	18:01:00	7	1	1	7	19	37	127	79	124	283	109	11
crispbread	f	801	228	13:43:00	6	1	1	41	105	121	149	112	93	103	50	19
coconut cream	f	798	219	12:31:00	5	2	17	84	134	112	118	84	87	92	55	8
nut butter	f	797	258	12:12:00	1	6	34	45	157	148	101	109	90	62	36	8
sesame seed	f	797	314	12:57:00	3	2	7	51	171	80	159	78	89	107	45	5
doritos	f	796	494	16:30:00	7	3	2	5	11	73	156	123	133	131	113	39
egg omelette	f	795	379	10:58:00	2	0	8	72	202	182	135	41	45	77	30	1
chard	f	795	318	13:55:00	2	2	2	33	106	115	149	84	111	136	51	4
pasta salad	f	793	549	15:36:00	8	1	2	5	11	65	241	83	115	200	52	10
chicory	f	789	180	13:33:00	8	2	12	67	131	92	115	100	81	97	68	16
rice noodle	f	788	477	16:52:00	9	4	1	12	27	51	189	89	86	221	91	8
fudge	f	785	448	17:34:00	7	3	1	21	28	47	103	120	91	180	141	43
romaine lettuce	f	782	297	16:40:00	4	2	1	5	19	44	202	99	125	214	59	8
capsicum	f	780	289	16:14:00	1	0	4	5	26	51	202	96	99	226	61	9
yerba mate	b	776	172	10:44:00	3	3	28	115	170	179	109	73	59	24	8	5
kidney bean	f	774	361	16:00:00	6	2	3	15	18	49	200	101	103	201	62	14
chocolate cookie	f	772	368	15:34:00	3	1	1	16	36	79	149	131	119	117	89	31
meat sauce	f	772	470	17:53:00	3	0	1	2	10	46	132	47	163	283	68	17
ginger ale	b	768	420	17:57:00	13	2	3	7	15	37	118	88	123	189	130	43
wheat bread	f	765	295	13:03:00	8	5	3	68	111	105	173	84	63	91	44	10
plantain	f	763	382	14:30:00	5	2	1	18	69	73	191	97	88	142	66	11
cola	b	758	274	16:53:00	11	4	0	15	35	61	128	97	124	145	100	38
mixed green	f	754	296	14:32:00	4	8	2	9	34	74	217	84	92	168	50	12
rocket	f	753	339	14:26:00	2	0	0	15	49	49	226	103	76	169	61	3
snicker	f	750	507	15:39:00	13	10	3	17	37	67	131	140	116	96	87	33
flatbread	f	750	446	16:00:00	3	2	7	13	40	69	159	86	107	181	73	10
hot sauce	f	747	316	14:08:00	8	1	3	34	90	98	141	87	103	136	38	8
seafood	f	745	538	17:44:00	4	3	3	5	11	34	153	75	113	211	113	20
flour	f	738	294	13:54:00	9	0	9	24	115	91	134	78	90	117	54	17
bourbon	b	738	318	19:06:00	12	8	3	5	11	26	30	35	106	248	181	73
gummies	f	736	190	14:05:00	9	2	33	62	77	95	99	75	63	81	95	45
crepe	f	734	473	13:30:00	8	1	1	26	107	132	141	98	62	86	60	12
goat	f	727	257	13:43:00	6	5	8	33	124	102	119	81	80	100	55	14
cashew milk	b	724	154	10:30:00	1	2	16	130	177	117	74	58	40	53	46	10
peanut butter sandwich	f	723	319	13:32:00	9	2	6	36	74	116	157	99	83	80	39	22
queso	f	721	369	16:55:00	7	0	1	20	41	65	102	90	104	185	70	36
brown sugar	f	720	230	09:49:00	0	0	9	156	216	115	66	38	47	38	22	13
avocado oil	f	719	247	14:20:00	6	1	1	27	76	72	165	97	81	142	41	10
egg salad	f	719	471	13:24:00	2	1	1	21	53	103	238	102	71	86	36	5
subway	f	718	478	14:36:00	5	1	0	6	11	71	231	104	114	116	44	15
spaghetti squash	f	717	368	17:26:00	4	2	0	12	17	64	141	58	129	224	56	10
swiss cheese	f	717	352	13:55:00	6	4	2	27	52	104	179	96	100	94	37	16
pepperoni pizza	f	714	463	17:46:00	4	3	1	7	17	41	116	63	126	198	109	29
cinnamon roll	f	712	483	12:06:00	3	0	2	48	147	153	104	83	62	62	36	12
parsnip	f	709	367	17:27:00	3	1	0	6	19	37	166	72	104	233	63	5
yam	f	705	360	16:54:00	8	3	0	26	57	52	136	60	96	198	59	10
chicken wrap	f	705	499	14:30:00	4	1	0	4	14	66	235	100	91	127	52	11
reeses	f	705	380	16:29:00	18	8	5	12	23	45	92	141	114	131	82	34
chia pudding	f	704	257	12:05:00	1	1	15	58	149	122	145	58	64	62	22	7
black pepper	f	703	183	13:42:00	10	9	10	53	78	82	139	78	68	121	41	14
mandarin orange	f	702	288	13:33:00	0	4	12	25	97	103	141	105	94	74	35	12
pepsi max	b	701	142	16:33:00	2	1	3	3	19	67	131	93	147	130	76	29
prosciutto	f	699	388	16:00:00	6	0	0	29	59	62	122	76	107	153	68	17
pad thai	f	697	510	17:46:00	10	0	0	3	8	47	154	64	88	223	87	13
tuna sandwich	f	694	502	13:24:00	13	3	0	8	24	93	274	98	68	76	28	9
bean soup	f	693	379	14:49:00	3	3	0	5	18	62	201	102	111	135	44	9
dried apricot	f	689	278	14:38:00	5	1	5	32	98	75	101	116	115	87	47	7
cocoa powder	f	688	197	13:28:00	15	4	20	65	122	86	71	82	82	86	27	28
peanut butter cup	f	687	358	16:27:00	7	1	1	7	17	50	99	140	109	131	100	25
taco salad	f	685	497	17:24:00	10	2	0	2	3	47	162	55	132	224	43	5
tempeh	f	684	323	15:12:00	2	1	4	9	37	54	181	85	103	160	40	8
romaine	f	679	271	15:30:00	6	6	4	9	25	61	176	74	104	172	36	6
milk tea	b	675	176	13:43:00	4	2	6	51	123	90	78	68	108	91	47	7
refried bean	f	674	408	16:48:00	6	1	1	14	40	67	123	67	119	179	50	7
spring onion	f	672	319	14:50:00	2	1	3	11	43	52	186	82	64	170	52	6
turkey sausage	f	669	319	10:37:00	0	1	6	83	175	147	91	39	59	46	19	3
peanut butter toast	f	668	313	10:27:00	3	2	5	124	170	114	65	60	41	45	27	12
basmati rice	f	668	312	17:53:00	2	1	0	1	15	35	130	69	96	225	82	12
cranberry juice	b	666	265	14:32:00	9	6	7	50	89	97	69	62	68	125	62	22
dosa	f	665	240	13:00:00	4	0	0	29	178	100	74	37	35	108	87	13
brisket	f	664	438	17:18:00	4	1	4	11	19	60	124	64	99	191	73	14
egg roll	f	663	478	16:06:00	1	3	1	20	58	53	134	64	91	176	54	8
broth	f	663	340	14:51:00	1	1	5	13	42	59	164	105	79	122	58	14
rose wine	b	663	287	19:00:00	3	0	0	5	3	2	36	34	105	267	156	52
pho	f	661	475	16:44:00	7	3	3	2	16	46	169	73	79	177	66	20
diet dr pepper	b	659	154	14:08:00	3	2	8	27	55	105	126	103	85	80	47	18
miso	f	659	332	14:30:00	0	1	0	30	55	53	159	79	102	126	49	5
shortbread	f	657	360	15:46:00	8	5	2	20	33	72	97	124	102	91	82	21
okra	f	656	399	16:46:00	1	2	1	10	9	58	143	87	93	159	81	12
paneer	f	655	325	17:35:00	5	1	0	1	18	40	146	89	49	146	134	26
ricotta	f	652	340	15:30:00	2	0	0	16	50	63	136	75	65	169	64	12
hibiscus tea	b	652	189	14:26:00	2	0	3	48	77	72	100	111	83	88	47	21
green onion	f	651	296	14:30:00	2	6	2	18	57	85	141	54	68	151	48	19
vegetable pizza	f	651	407	17:55:00	2	3	1	6	13	38	117	51	103	223	72	22
vegan protein	b	650	154	12:29:00	1	3	3	65	113	113	91	75	63	70	44	9
roast potato	f	649	420	18:10:00	1	1	0	6	7	22	91	60	106	276	71	8
black olive	f	644	300	15:14:00	1	1	2	19	37	62	150	82	111	143	35	1
pea protein	b	643	135	11:35:00	4	0	1	89	141	111	71	66	68	53	31	8
hemp	f	643	218	11:40:00	9	0	3	49	178	109	86	57	50	55	33	14
maca	f	642	185	10:54:00	1	2	5	73	176	135	79	58	47	37	19	10
vegetable juice	b	641	189	12:00:00	2	0	10	75	132	92	106	66	76	62	18	2
skyr	f	639	188	13:06:00	4	4	2	61	117	77	101	66	80	82	35	10
crumble	f	638	385	18:20:00	1	1	1	7	38	31	76	64	74	222	105	18
larabar	f	636	245	14:00:00	3	1	6	35	64	97	115	129	87	53	28	18
brown bread	f	633	220	13:02:00	1	1	2	45	73	132	144	83	57	57	29	9
cliff bar	f	631	282	13:08:00	8	3	2	42	81	124	107	92	86	51	21	14
polenta	f	630	369	16:04:00	3	0	1	10	43	45	127	85	85	158	61	12
salad dressing	f	629	269	14:16:00	4	0	2	5	13	54	220	73	71	140	37	10
athletic green	b	626	102	10:10:00	0	0	32	119	131	153	99	33	24	22	9	4
chicken broth	b	626	294	15:02:00	0	1	2	13	35	80	124	104	78	129	50	10
milkshake	b	624	420	16:42:00	8	2	1	15	49	59	67	96	87	120	92	28
vanilla ice cream	f	621	413	18:59:00	9	0	1	0	6	7	48	51	97	209	159	34
goat milk	b	618	127	11:21:00	0	1	3	102	123	110	82	66	51	49	25	6
cheetos	f	615	396	15:30:00	9	3	4	5	12	56	138	123	84	75	63	43
vinaigrette	f	615	297	16:08:00	4	2	0	3	10	41	172	76	70	172	55	10
lemon tea	b	615	207	13:51:00	9	4	1	45	126	72	80	59	73	68	59	19
pork rind	f	614	280	16:16:00	7	3	4	3	15	61	85	117	122	113	49	35
chicken noodle soup	f	612	415	14:18:00	2	0	0	5	17	77	190	62	72	132	41	14
crystal light	b	609	111	14:00:00	3	1	9	49	53	78	115	65	75	98	50	13
white bean	f	609	328	15:50:00	1	0	2	12	19	51	160	63	100	158	38	5
onion ring	f	609	522	17:45:00	2	2	0	1	4	33	103	74	111	181	76	22
samosa	f	608	431	16:34:00	3	0	0	2	21	64	138	61	90	157	54	18
pumpkin soup	b	607	342	15:42:00	6	1	3	5	13	41	172	79	72	153	55	7
pinto bean	f	604	296	16:10:00	5	2	1	20	31	50	134	62	110	141	40	8
grit	f	604	371	11:12:00	3	0	8	54	155	125	90	25	34	77	27	6
sprite	b	600	340	17:30:00	8	3	0	7	13	42	112	63	102	119	95	36
scotch	b	599	274	19:02:00	10	3	2	7	13	21	46	44	86	158	146	63
zevia	b	599	150	15:07:00	1	2	4	23	24	54	127	99	110	101	47	7
rice milk	b	598	134	10:00:00	5	1	19	89	189	104	42	38	36	44	22	9
oyster	f	598	405	17:03:00	4	2	1	6	27	46	99	92	79	168	51	23
mousse	f	597	340	17:43:00	6	1	2	14	22	36	97	74	73	126	117	29
root beer	b	596	356	17:28:00	6	2	2	3	8	38	122	67	89	145	94	20
overnight oats	f	595	182	09:15:00	0	0	10	121	248	122	48	13	22	9	2	0
balsamic	f	593	335	16:07:00	5	1	0	4	14	39	166	63	84	159	53	5
cafe latte	b	592	123	10:40:00	3	0	4	70	162	143	100	68	26	6	4	6
cheese pizza	f	591	419	17:33:00	6	1	3	5	11	40	96	67	106	166	74	16
double espresso	b	590	97	09:44:00	5	0	10	126	167	112	68	48	24	12	9	9
breakfast sandwich	f	589	332	09:35:00	1	1	4	111	214	146	71	19	9	6	6	1
baked chicken	f	588	341	17:42:00	15	6	3	13	7	36	105	57	91	182	58	15
ribeye	f	588	314	17:47:00	6	2	0	28	19	31	68	52	115	188	71	8
gummy	f	587	184	13:55:00	4	1	2	64	96	67	69	52	56	69	68	39
corn cob	f	587	421	18:21:00	1	0	0	0	3	17	60	29	132	253	79	13
red bell pepper	f	586	232	15:34:00	5	1	0	15	48	51	134	60	90	115	55	12
scallop	f	585	466	18:20:00	2	0	2	6	13	20	73	50	85	237	87	10
chai latte	b	583	286	12:30:00	0	0	4	36	111	108	91	104	63	38	22	6
wafer	f	579	317	15:57:00	6	1	3	21	42	61	85	80	101	85	72	22
wholemeal bread	f	579	153	12:54:00	2	3	6	39	115	87	113	50	45	85	29	5
quark	f	579	155	13:22:00	3	0	1	39	120	73	81	48	72	90	37	15
flat white coffee	b	577	134	11:00:00	2	1	5	36	154	164	109	63	26	9	7	1
fish taco	f	577	463	17:30:00	2	6	0	2	3	26	132	69	89	190	50	8
jerky	f	576	306	14:35:00	3	4	5	7	34	76	130	123	94	61	25	14
creme	b	574	278	14:35:00	1	2	11	35	73	42	101	73	61	91	78	6
barbecue sauce	f	573	367	17:07:00	7	1	2	12	16	61	114	56	84	174	38	8
cheese cracker	f	572	363	16:05:00	3	3	6	3	12	45	110	101	105	109	50	25
pumpkin pie	f	572	303	17:10:00	7	0	6	17	43	53	59	61	91	146	73	16
green olive	f	570	258	15:30:00	3	2	9	8	12	60	139	68	90	135	34	10
lime juice	b	570	210	13:34:00	3	0	4	46	78	80	90	51	54	101	48	15
pita chip	f	570	309	15:45:00	6	2	0	7	22	62	106	99	126	93	39	8
red grape	f	566	211	14:32:00	3	0	2	10	48	74	117	117	75	72	36	12
rx bar	f	565	203	13:10:00	4	2	11	30	57	120	98	103	65	37	26	12
nugget	f	565	375	16:01:00	7	1	4	22	16	55	110	74	90	116	53	17
cold brew	b	564	186	10:54:00	0	1	9	73	141	122	81	73	39	16	5	4
soy latte	b	563	140	10:34:00	1	0	3	50	176	146	89	63	17	13	5	0
dried mango	f	562	270	15:40:00	13	4	1	5	26	61	90	115	93	80	53	21
persimmon	f	562	194	13:24:00	1	1	1	48	60	89	108	70	63	63	52	6
margarine	f	561	156	12:30:00	4	4	7	72	92	74	99	43	66	63	30	7
chicken burger	f	559	416	17:30:00	4	0	1	2	8	21	128	74	79	164	62	16
quinoa salad	f	558	317	14:37:00	7	1	0	5	10	48	193	65	67	113	40	9
turkey breast	f	558	272	14:27:00	7	2	4	14	32	53	137	94	80	97	30	8
chocolate ice cream	f	557	362	19:01:00	2	4	0	5	2	12	39	68	76	169	150	30
turkey burger	f	557	352	17:30:00	0	0	3	5	11	34	116	55	101	168	59	5
rhubarb	f	557	292	16:00:00	2	1	2	19	64	58	74	61	52	126	86	12
chicken tender	f	557	372	16:55:00	6	2	1	2	11	46	123	64	96	136	50	20
martini	b	556	289	18:52:00	9	4	2	2	5	3	9	16	125	239	106	36
mate	b	554	104	11:29:00	2	0	2	53	124	125	56	41	82	44	21	4
monster	b	551	156	12:13:00	7	4	9	88	94	73	87	68	55	36	24	6
pine nut	f	550	283	15:13:00	2	8	3	20	47	51	111	62	74	120	47	5
potato soup	b	549	341	15:29:00	6	0	2	5	10	38	165	66	78	131	36	12
weetabix	f	549	146	09:09:00	3	3	5	131	220	116	24	11	4	14	10	8
flapjack	f	549	255	13:43:00	1	0	1	15	54	85	139	101	73	47	27	6
avocado salad	f	546	342	15:50:00	2	0	2	8	12	39	154	63	90	135	34	7
chicken taco	f	546	421	17:40:00	3	0	0	2	3	38	106	43	110	182	50	9
passion fruit	f	537	290	14:01:00	4	0	0	27	67	76	98	55	62	84	55	9
almond flour	f	536	220	14:42:00	0	1	1	13	64	82	72	94	88	72	31	18
goji berry	f	536	184	12:34:00	1	0	2	37	99	107	79	72	56	46	31	6
oatmeal cookie	f	534	285	14:54:00	1	5	4	10	35	67	119	85	75	57	58	18
chardonnay	b	533	159	18:58:00	4	1	1	3	9	4	12	24	90	249	109	27
blueberry muffin	f	532	365	11:26:00	3	3	6	55	118	115	62	60	36	36	30	8
oregano	f	531	158	13:55:00	17	4	12	45	73	64	74	44	46	82	44	26
sweetcorn	f	531	263	17:17:00	0	0	1	0	5	17	170	45	87	163	40	3
venison	f	531	239	17:08:00	8	1	2	12	23	50	104	42	85	152	42	10
chutney	f	530	246	12:54:00	1	0	0	18	103	94	101	49	32	84	44	4
french fry	f	530	416	17:04:00	5	4	0	0	8	23	119	83	82	127	62	17
chamomile	b	530	159	18:26:00	15	4	6	30	59	50	43	36	30	62	134	61
sunflower	f	525	230	13:13:00	2	0	4	45	87	67	91	63	68	65	27	6
turmeric tea	b	524	194	14:14:00	2	0	5	49	67	76	55	63	62	65	59	21
mushroom soup	b	524	362	15:42:00	4	0	0	0	11	34	160	61	64	116	54	20
doughnut	f	523	348	12:37:00	3	1	1	29	107	102	71	45	50	52	49	13
pork loin	f	522	284	17:55:00	1	3	0	7	17	46	85	33	82	186	48	14
stuffing	f	520	328	17:18:00	5	1	3	9	5	32	104	55	102	169	28	7
jasmine rice	f	519	229	17:24:00	2	2	0	2	13	31	113	59	93	130	66	8
tortellini	f	518	373	17:40:00	2	1	1	1	5	33	111	42	90	153	74	5
cucumber salad	f	517	314	15:30:00	4	0	0	6	10	30	158	66	75	129	34	5
agave	f	517	116	10:36:00	2	4	15	68	137	87	50	46	31	34	28	15
vitamin water	b	516	159	14:28:00	5	3	2	23	63	74	84	71	66	78	33	14
non alcoholic beer	b	515	168	18:20:00	3	0	0	1	3	15	48	50	96	196	83	20
beef burger	f	514	337	17:43:00	4	2	1	8	10	30	83	60	80	163	64	9
sultana	f	512	134	11:52:00	0	0	2	55	118	85	65	43	48	59	32	5
cabbage salad	f	511	288	15:30:00	3	1	0	2	17	39	133	79	79	119	32	7
tequila	b	510	272	19:30:00	19	5	4	4	4	8	16	27	79	143	115	86
schnitzel	f	510	340	16:31:00	3	1	0	1	5	39	144	55	67	143	46	6
lion mane	f	510	95	11:12:00	2	1	21	82	93	88	70	60	43	30	15	5
dried cranberry	f	510	219	12:54:00	3	3	4	36	79	76	110	42	70	57	22	8
dill	f	506	256	15:48:00	0	0	0	16	31	40	96	72	73	139	32	7
bulgar	f	504	274	14:37:00	5	1	0	3	4	49	161	68	45	118	41	9
chicken leg	f	503	308	17:16:00	8	1	0	5	9	29	114	56	80	139	52	10
vegemite	f	503	195	10:50:00	1	0	3	85	126	84	65	57	25	35	18	4
filet	f	503	355	17:43:00	4	2	1	8	15	32	94	52	60	149	77	9
danish	f	502	334	12:18:00	1	0	5	32	108	92	83	70	50	36	21	4
minestrone	b	501	285	17:04:00	2	0	2	1	6	28	133	52	73	151	44	9
garden salad	f	500	244	17:31:00	0	0	1	1	3	36	128	50	68	178	31	4
pork sausage	f	499	268	13:21:00	2	2	2	28	92	80	76	34	49	87	37	10
rooibos	f	498	136	14:34:00	3	3	2	27	75	67	61	80	67	47	49	17
red bean	f	496	277	16:10:00	5	2	0	8	14	32	123	67	91	97	36	21
graham cracker	f	495	261	16:16:00	12	4	4	10	17	52	66	87	84	75	55	29
noodle soup	f	494	318	16:18:00	5	1	2	6	18	38	113	64	70	116	54	7
cacao powder	f	493	132	11:49:00	0	0	12	74	91	78	81	44	44	39	18	12
snap pea	f	492	222	14:42:00	4	1	3	11	16	56	128	65	77	92	33	6
bean salad	f	490	292	15:30:00	1	1	1	11	13	33	146	54	75	111	41	3
trout	f	489	315	17:23:00	2	0	1	8	23	29	94	44	79	148	50	11
gyro	f	484	366	16:52:00	6	0	0	6	12	33	125	43	67	126	61	5
tamale	f	484	317	16:00:00	4	2	1	9	21	63	102	44	72	121	36	9
oolong	b	483	148	12:03:00	2	0	3	49	100	88	76	68	33	28	19	17
matcha latte	b	482	168	11:01:00	0	0	12	40	124	107	77	65	33	22	1	1
yellow pepper	f	482	251	15:37:00	2	0	1	15	20	44	115	54	63	130	33	5
sausage roll	f	481	331	13:38:00	4	0	1	9	35	67	147	70	58	59	25	6
turnip	f	481	250	15:17:00	3	0	1	20	20	45	116	56	56	126	29	9
crumpet	f	479	252	12:00:00	1	0	5	42	109	82	82	44	45	44	20	5
focaccia	f	473	288	15:00:00	5	0	3	8	31	58	102	63	55	100	38	10
ezekiel bread	f	472	123	11:14:00	2	5	11	81	105	76	66	32	29	47	16	2
herring	f	472	244	14:16:00	2	0	0	8	38	36	142	61	68	76	31	10
celery juice	b	472	140	09:20:00	0	0	9	121	148	96	41	18	14	12	9	4
calamari	f	471	402	18:02:00	4	0	0	5	11	11	76	51	78	165	59	11
hemp heart	f	471	129	11:14:00	3	0	5	55	107	96	70	62	23	35	13	2
cacao nib	f	468	153	12:24:00	1	0	0	27	78	104	76	56	46	51	25	4
quest bar	f	468	141	13:53:00	3	1	4	29	47	77	84	78	74	39	28	4
empanada	f	467	281	15:33:00	2	1	2	2	26	56	90	71	52	82	56	27
swiss chard	f	465	187	15:00:00	1	0	0	21	54	57	87	30	56	109	47	3
cordial	b	465	119	17:46:00	1	2	0	4	16	26	71	50	75	152	55	13
tater tot	f	465	346	17:35:00	2	0	0	10	33	44	67	27	74	153	44	11
flour tortilla	f	464	236	13:32:00	3	1	7	21	61	66	96	52	52	69	28	8
beverage	b	464	149	15:34:00	16	11	1	33	45	67	48	55	52	53	60	23
barbecue chicken	f	464	313	17:36:00	6	0	0	7	7	25	86	45	84	152	45	7
pork rib	f	463	325	17:52:00	4	1	1	7	9	24	67	44	86	155	56	9
chicken strip	f	463	333	16:05:00	6	1	2	2	6	36	121	61	57	121	37	13
currant	f	462	172	13:18:00	0	0	0	43	84	56	67	38	58	63	46	7
extra virgin olive oil	f	462	100	15:06:00	3	1	0	7	31	29	109	77	63	77	44	21
coriander	f	462	225	15:00:00	1	0	0	13	21	33	114	73	58	103	39	7
plantain chip	f	460	201	15:36:00	7	1	0	1	9	58	105	76	69	77	43	14
strawberry jam	f	459	242	11:32:00	1	0	5	54	105	78	44	55	37	44	22	14
brussel	f	459	304	17:17:00	1	0	1	2	12	38	89	48	76	143	38	11
fruit juice	b	458	200	13:31:00	1	2	3	25	66	67	89	47	60	59	28	11
fried potato	f	455	314	16:20:00	4	0	0	10	34	49	78	54	53	98	57	18
red lentil	f	455	229	16:41:00	3	0	2	2	14	38	110	54	63	134	31	4
whole wheat toast	f	453	164	10:17:00	0	0	19	60	126	86	54	28	23	45	11	1
tiramisu	f	453	343	17:46:00	4	1	2	4	12	27	77	62	48	100	88	28
ice cream sandwich	f	453	244	18:04:00	8	1	2	1	7	19	57	64	71	94	99	30
tonic water	b	452	187	18:55:00	16	1	1	9	5	12	29	47	64	123	97	48
nespresso	b	452	50	09:38:00	0	3	14	122	118	85	35	34	24	10	6	1
brioche	f	452	250	11:54:00	2	1	4	36	107	83	52	40	51	48	16	12
sriracha	f	452	199	14:20:00	6	0	0	26	29	58	100	58	54	86	26	9
quorn	f	451	219	17:30:00	4	1	0	4	12	22	106	37	65	144	52	4
blt	f	451	348	14:18:00	1	0	4	3	26	57	124	47	67	87	34	1
ginseng	f	450	100	10:44:00	6	0	5	71	119	62	44	47	48	22	18	8
ginger beer	b	450	243	18:19:00	7	2	2	4	3	13	58	37	80	137	85	22
moringa	f	449	100	12:04:00	2	3	15	43	97	67	71	57	41	31	20	2
sirloin	f	448	281	17:50:00	0	3	0	2	20	23	71	45	69	151	53	11
biscotti	f	448	226	14:30:00	3	1	4	32	62	61	51	72	59	45	49	9
energy bar	f	447	187	13:14:00	3	0	13	30	47	77	81	67	74	32	20	3
banana smoothie	b	446	223	11:34:00	1	1	6	44	101	82	66	53	44	31	14	3
fat bomb	f	445	123	16:29:00	4	2	1	16	31	45	62	59	72	99	41	13
buttermilk	b	444	187	13:30:00	1	0	1	20	48	55	113	58	48	54	35	11
mixed fruit	f	444	228	12:30:00	1	1	1	40	91	71	77	31	37	54	34	6
popsicle	f	444	232	18:22:00	5	0	1	1	7	15	47	63	63	116	99	27
grape juice	b	443	159	14:59:00	5	2	0	34	77	31	49	51	52	83	46	13
cheese bread	f	441	287	15:30:00	4	1	4	18	51	56	61	41	71	88	33	13
cold brew coffee	b	441	125	10:31:00	0	1	7	86	109	67	66	50	34	14	6	1
ale	b	441	191	19:00:00	6	0	2	0	5	5	29	27	80	155	95	37
bean burrito	f	441	281	16:00:00	1	3	0	7	27	35	101	50	78	100	30	9
provolone	f	440	241	14:00:00	2	3	3	12	12	58	135	77	57	54	21	6
puree	f	440	232	14:36:00	2	1	2	16	46	46	93	44	55	93	38	4
mixed green salad	f	439	149	16:48:00	2	0	1	7	11	33	96	53	82	114	34	6
spring mix	f	439	162	15:24:00	1	2	1	1	11	37	139	46	65	91	35	10
rotisserie chicken	f	439	226	17:06:00	5	0	0	1	6	33	105	41	84	123	32	9
tilapia	f	437	280	17:52:00	3	0	0	1	4	23	81	37	86	154	39	9
guava	f	436	204	14:08:00	3	1	2	15	47	58	88	62	53	62	31	14
belvita	f	436	157	10:52:00	1	0	10	45	116	80	57	51	36	21	17	2
peanut butter cookie	f	435	236	15:59:00	3	6	2	7	24	40	70	75	74	71	44	19
fig bar	f	434	194	13:12:00	3	1	5	24	71	75	65	68	64	35	16	7
espresso coffee	b	432	65	10:22:00	0	1	8	86	109	78	60	42	32	13	2	1
cereal bar	f	432	200	13:08:00	5	0	2	20	60	91	75	55	67	39	15	3
sweet pepper	f	431	150	14:26:00	1	0	1	10	34	61	101	65	54	79	22	3
macchiato	b	430	171	11:48:00	1	1	1	57	84	78	73	87	34	6	6	2
collard green	f	429	210	15:58:00	1	0	2	7	14	54	98	40	72	108	31	2
rice pudding	f	426	250	16:54:00	2	2	0	7	11	34	85	49	66	111	44	15
green pea	f	424	237	15:05:00	1	2	0	8	18	44	109	53	50	95	36	8
grapefruit juice	b	424	183	12:00:00	4	0	10	63	76	63	48	35	41	40	31	13
lobster	f	423	345	18:28:00	5	2	0	1	9	21	57	36	52	156	72	12
jacket potato	f	423	260	17:52:00	1	0	0	0	1	5	109	37	66	173	30	1
oatcake	f	423	167	14:27:00	3	0	1	8	28	53	107	64	68	55	25	11
marshmallow	f	421	245	17:40:00	6	4	0	11	27	21	49	56	53	82	82	30
lamb chop	f	421	288	18:37:00	7	0	1	2	8	13	51	36	55	166	72	10
sweet corn	f	421	254	17:23:00	5	0	3	3	17	21	82	46	65	134	37	8
saltine	f	421	221	15:07:00	5	4	6	6	18	49	88	59	55	71	38	22
truffle	f	420	265	16:36:00	0	0	1	14	16	32	74	60	54	99	54	16
acai	f	419	201	13:40:00	1	1	1	18	74	61	73	54	44	50	39	3
hash	f	419	259	12:00:00	0	0	0	34	73	99	93	28	24	50	12	6
nut mix	f	418	168	13:38:00	1	0	0	10	71	71	68	70	59	31	25	12
v8	b	418	163	12:38:00	2	2	2	24	61	79	93	41	50	39	22	3
pork belly	f	417	249	16:34:00	1	1	1	24	32	39	69	36	53	115	38	8
tostada	f	416	234	16:50:00	3	0	1	1	37	39	58	48	67	112	37	13
penne	f	415	262	17:51:00	7	0	0	3	2	25	71	39	73	133	53	9
chocolate almond	f	412	225	15:56:00	3	2	0	14	21	36	60	78	70	66	43	19
ciabatta	f	409	221	14:09:00	3	1	1	6	44	49	89	56	46	75	30	9
jello	f	409	198	17:10:00	5	0	1	5	11	34	60	54	80	81	55	23
dill pickle	f	408	220	15:30:00	2	3	3	2	7	42	118	50	82	73	20	6
rise	f	407	150	14:07:00	7	1	0	16	23	49	110	57	37	69	34	4
panini	f	407	308	13:29:00	3	0	1	4	24	58	149	66	36	36	24	6
frozen yogurt	f	406	284	18:27:00	1	0	1	2	1	10	35	74	50	134	82	16
deviled egg	f	406	258	15:14:00	2	1	1	6	31	44	91	51	70	75	26	8
chive	f	404	199	13:42:00	1	0	2	12	65	55	75	25	53	81	31	4
toffee	f	404	224	15:51:00	4	4	3	6	13	30	74	80	56	65	55	14
vega	b	404	130	12:06:00	1	0	4	25	84	82	73	47	40	33	13	2
supper	f	404	103	18:45:00	6	0	1	1	2	1	4	3	92	214	68	12
vegetable smoothie	b	402	106	10:26:00	1	0	3	61	122	71	69	21	23	23	6	2
english breakfast tea	b	401	70	11:14:00	1	2	8	68	94	49	57	41	31	20	23	7
marinara	f	400	242	17:44:00	0	1	0	3	3	23	78	38	75	127	47	5
monk fruit	f	400	73	09:32:00	0	1	16	98	102	73	29	36	21	17	5	2
hot cross bun	f	399	173	13:35:00	2	0	1	25	61	64	65	65	45	37	24	10
kelp	f	398	98	11:02:00	1	1	1	75	93	48	61	25	22	40	22	9
arepa	f	398	127	12:30:00	1	0	8	38	79	65	41	21	19	61	59	6
cashew butter	f	398	148	15:08:00	5	1	0	20	37	43	65	50	55	81	33	8
tzatziki	f	397	212	16:55:00	1	1	0	3	8	32	78	57	69	105	39	4
paratha	f	396	176	13:59:00	3	0	1	16	62	72	47	46	32	53	53	11
beef taco	f	396	287	17:49:00	1	0	1	5	7	25	51	42	74	131	50	9
rosemary	f	396	189	15:01:00	1	3	1	18	32	37	87	41	58	86	23	9
cobb salad	f	396	296	14:10:00	2	2	1	1	5	32	146	56	47	76	24	4
ice cream cone	f	394	259	18:00:00	4	1	0	4	2	7	34	86	62	105	70	19
oat meal	f	393	98	09:48:00	0	2	5	46	158	81	35	8	30	17	9	2
ritz cracker	f	392	225	14:50:00	11	4	1	4	18	57	89	59	52	52	29	16
ag1	f	392	52	10:03:00	0	2	12	86	95	66	43	26	25	17	12	8
crouton	f	391	228	16:54:00	2	3	1	4	7	23	99	38	67	103	39	5
fritter	f	391	261	15:23:00	5	0	0	9	23	49	76	48	55	91	32	3
panera	f	390	208	13:39:00	1	1	0	11	23	46	127	46	61	54	18	2
black decaffeinated coffee	b	389	56	09:36:00	2	0	7	102	96	71	39	19	15	19	18	1
mussel	f	389	291	18:12:00	0	3	0	4	3	14	66	51	44	131	61	12
red bull	b	388	162	13:56:00	9	1	6	30	48	57	60	62	61	26	17	11
bratwurst	f	385	264	17:01:00	1	1	0	9	18	30	76	36	55	116	37	6
oat bran	f	384	97	09:18:00	0	0	4	59	178	67	31	13	7	17	8	0
rye toast	f	384	177	10:50:00	3	0	9	39	105	78	66	17	16	38	11	2
pringles	f	384	222	17:06:00	9	5	3	1	10	32	63	51	61	75	49	25
truvia	b	382	47	09:44:00	4	0	9	99	91	65	37	23	16	20	13	5
sugar snap pea	f	381	182	15:14:00	1	0	0	2	9	33	107	61	55	92	20	1
frittata	f	381	216	12:09:00	0	1	2	30	88	62	64	19	31	56	26	2
mcmuffin	f	381	277	09:15:00	1	2	9	88	138	92	30	8	4	6	3	0
vegetable wrap	f	380	249	13:20:00	1	0	0	4	12	46	157	54	41	49	15	1
rolled oat	f	380	102	09:49:00	0	0	11	63	127	91	39	20	7	10	10	2
italian sausage	f	380	222	17:33:00	2	0	3	7	14	33	59	33	72	124	24	9
sambar	f	380	138	14:00:00	1	0	1	17	42	30	98	67	17	51	49	7
carrot juice	b	378	176	12:30:00	1	0	1	27	72	70	57	40	40	37	29	4
vegetable sandwich	f	378	247	13:30:00	0	1	1	2	13	48	150	55	44	42	18	4
almond creamer	b	376	51	09:30:00	0	1	20	82	119	66	29	25	12	15	7	0
chicken enchilada	f	375	244	17:37:00	2	0	0	2	7	27	78	28	60	141	23	7
carb	f	374	125	15:07:00	3	1	11	20	35	39	48	51	47	69	30	20
himalayan salt	f	373	68	12:32:00	1	0	3	49	64	51	61	38	30	55	19	2
shredded wheat	f	373	109	09:09:00	0	1	5	97	132	48	18	20	8	16	23	5
carbonara	f	372	277	17:54:00	1	0	0	0	3	18	67	45	56	119	50	13
fritos	f	372	223	15:42:00	5	1	1	2	7	37	76	68	68	54	30	23
breadstick	f	372	251	17:22:00	4	2	0	2	10	22	60	53	75	104	34	6
burrito bowl	f	372	239	16:46:00	1	3	0	2	4	27	95	47	45	104	40	4
unsweetened iced tea	b	371	109	13:35:00	0	1	0	15	23	55	109	60	48	44	9	7
grape tomato	f	371	143	14:46:00	0	1	0	5	22	40	100	39	62	64	30	8
peanut butter cracker	f	371	179	14:26:00	7	6	5	26	34	40	62	67	58	25	23	18
fruit yogurt	f	368	151	11:26:00	5	0	1	30	116	57	39	23	19	52	20	6
raisin bran	f	368	174	10:26:00	2	4	6	54	106	59	29	20	19	32	27	10
bran flake	f	367	107	09:17:00	5	0	2	89	127	68	33	6	12	9	14	2
brie cheese	f	366	184	14:54:00	4	2	2	9	30	33	80	52	44	65	34	11
wonton	f	364	280	16:49:00	5	0	0	7	8	22	83	43	56	95	39	6
vegan sausage	f	364	198	16:00:00	0	0	0	6	38	43	61	33	70	84	26	3
protein ball	f	364	117	14:02:00	3	1	4	9	41	61	65	68	59	33	18	2
chicken pot pie	f	364	260	17:49:00	3	0	0	5	2	20	69	26	71	134	28	6
green drink	b	363	84	11:17:00	0	0	17	55	77	49	59	37	23	23	17	6
anchovy	f	363	218	16:07:00	3	0	0	5	10	22	85	56	46	96	27	13
french bread	f	362	222	16:50:00	0	0	2	25	21	27	60	29	61	93	38	6
kit kat	f	362	224	16:15:00	7	2	0	5	10	25	56	75	66	54	45	17
chestnut	f	361	198	16:31:00	2	0	1	10	13	39	61	38	66	78	44	9
fried fish	f	361	262	17:10:00	1	2	0	3	9	26	70	44	57	90	46	13
grilled cheese sandwich	f	361	263	15:29:00	0	1	1	5	8	27	105	43	47	92	22	10
black rice	f	360	176	15:58:00	7	1	2	9	21	17	78	55	40	103	20	7
coconut flake	f	359	119	12:15:00	1	1	5	29	89	52	34	44	35	35	26	8
chili con carne	f	359	219	17:41:00	0	1	0	0	6	17	91	28	50	117	44	5
kentucky fried chicken	f	359	253	17:08:00	4	0	2	0	6	18	72	51	61	86	45	14
chicken salad sandwich	f	357	237	13:29:00	0	0	0	0	10	43	157	60	31	35	13	8
caper	f	357	227	14:53:00	1	1	0	2	33	40	87	31	48	88	23	3
chili sauce	f	356	213	16:43:00	1	0	0	4	14	28	77	40	50	107	32	3
vegan butter	f	355	106	12:33:00	3	1	2	26	53	77	42	44	34	47	19	7
triscuits	f	354	162	15:30:00	3	0	2	2	18	48	66	61	54	56	33	11
ipa	b	354	134	18:51:00	7	3	1	2	4	5	19	24	62	133	68	26
tuna fish	f	354	209	13:54:00	1	1	0	8	10	43	122	49	39	46	29	6
pork tenderloin	f	353	226	18:07:00	2	0	0	5	8	20	46	27	62	140	33	10
magnum	f	353	185	18:28:00	1	0	0	0	4	11	33	47	64	101	75	17
buffet	f	353	254	14:00:00	5	1	1	2	18	33	120	50	25	65	25	8
biryani	f	352	207	17:38:00	2	1	1	0	6	22	65	57	32	83	59	24
chaga	f	352	86	11:42:00	2	0	3	38	87	54	46	42	36	22	16	6
squid	f	351	261	18:07:00	2	0	0	1	10	9	64	49	34	115	58	9
ice cream bar	f	350	197	18:46:00	8	0	1	0	2	10	41	51	44	89	81	23
cumin	f	349	124	13:40:00	1	0	1	41	45	35	58	39	38	53	29	9
gin tonic	b	348	186	19:26:00	22	3	1	0	3	4	6	20	52	111	86	40
oat flake	f	348	86	09:22:00	0	0	3	77	124	62	30	8	36	6	1	1
poke bowl	f	347	268	14:48:00	1	0	0	2	2	30	113	47	36	78	35	3
cardamom	b	344	86	11:15:00	6	1	0	19	119	49	35	31	23	31	19	11
chicken fajita	f	344	260	17:52:00	1	0	0	1	1	21	71	27	57	124	40	1
chocolate candy	f	341	157	16:01:00	7	2	2	2	18	24	65	57	60	58	33	13
berry smoothie	b	341	171	12:27:00	1	1	1	31	68	59	51	51	38	26	13	1
coconut butter	f	338	106	13:08:00	2	4	1	19	68	56	43	29	35	48	27	6
coffee cake	f	337	213	12:31:00	1	1	3	16	72	66	43	44	30	37	19	5
pineapple juice	b	337	181	14:09:00	1	1	2	27	41	41	50	46	31	62	30	5
carnitas	f	337	203	15:39:00	1	2	1	3	16	32	85	39	47	80	26	5
vita	b	336	114	12:14:00	4	1	7	40	69	44	44	35	27	28	22	15
gelato	f	335	236	18:30:00	2	2	2	1	1	14	29	55	45	102	75	7
pepita	f	335	130	12:29:00	1	1	0	13	53	68	84	29	29	44	10	3
lettuce wrap	f	335	232	15:07:00	0	1	5	2	6	26	102	42	52	73	24	2
green apple	f	333	157	14:12:00	2	0	2	7	32	54	66	59	58	31	16	6
reishi	f	332	83	14:14:00	3	0	3	50	58	35	18	21	20	29	78	17
frappuccino	b	332	201	14:14:00	1	1	0	16	48	38	56	72	48	35	14	3
dandelion	f	331	117	12:54:00	0	0	6	42	38	48	52	37	32	42	29	5
dandelion tea	b	330	80	13:48:00	2	1	4	19	41	60	45	44	33	48	27	6
vodka soda	b	329	109	19:13:00	15	2	3	0	2	0	6	13	73	112	78	25
caprese	f	328	233	17:14:00	3	0	1	2	12	30	62	36	46	98	33	5
wheat toast	f	328	157	10:08:00	3	1	3	40	114	63	30	15	26	27	5	1
dahl	f	328	181	17:42:00	1	0	1	1	5	17	75	36	42	101	42	7
buffalo chicken	f	327	212	16:12:00	3	1	0	3	5	38	76	34	47	75	39	6
chicken burrito	f	327	249	15:41:00	3	1	2	3	5	33	92	34	59	64	26	5
egg bite	f	327	181	10:24:00	1	0	4	50	91	76	53	25	13	9	5	0
cinnamon bun	f	327	207	13:29:00	2	0	1	13	35	65	57	55	33	37	22	7
sea bass	f	327	243	18:30:00	1	0	0	1	7	8	47	32	36	122	67	6
shredded cheese	f	327	146	15:33:00	1	0	1	25	20	26	74	23	34	85	31	7
rice bowl	f	325	204	15:30:00	1	1	0	1	11	36	87	36	52	68	28	4
hard cider	b	324	175	18:56:00	3	3	0	0	0	3	16	27	69	112	67	24
relish	f	324	164	14:30:00	5	1	2	6	17	37	89	39	43	62	17	6
special k	f	323	127	10:00:00	1	0	10	70	81	48	25	18	17	27	19	7
alcohol free beer	b	323	115	18:55:00	3	0	0	0	1	6	19	31	54	132	61	16
goulash	f	321	190	16:22:00	1	0	0	1	4	24	84	42	39	86	30	10
twix	f	321	216	15:31:00	3	1	3	3	6	41	55	71	41	47	29	21
oat milk latte	b	320	73	10:39:00	0	0	1	24	100	91	44	36	11	5	5	3
chobani	f	320	111	12:19:00	8	1	4	36	53	61	58	27	28	22	14	8
chicken stir fry	f	319	207	18:10:00	4	1	0	2	3	18	51	24	46	128	34	8
corned beef	f	319	194	15:06:00	1	0	3	7	28	32	66	32	38	84	26	2
rusk	f	319	95	10:20:00	3	1	8	54	79	46	34	25	26	29	8	6
red potato	f	318	166	16:44:00	5	3	1	12	19	25	53	33	65	84	16	2
shepherd pie	f	316	208	18:00:00	1	1	0	1	2	9	61	23	62	129	23	4
scallion	f	316	161	14:23:00	4	0	2	5	25	34	84	22	36	77	22	5
vegetable chip	f	315	192	16:08:00	3	0	1	3	11	29	60	46	57	64	27	14
beef patty	f	315	175	15:24:00	1	2	2	10	22	34	66	31	55	62	26	4
creme fraiche	f	315	147	18:04:00	1	0	0	3	11	22	45	21	49	120	40	3
soy creamer	b	315	36	09:11:00	0	0	15	83	115	52	15	5	10	10	9	1
pop tart	f	314	184	13:06:00	3	1	2	35	51	43	38	35	41	30	21	14
carrot soup	f	314	196	14:20:00	1	0	0	2	5	25	109	53	24	59	34	2
tapioca	f	312	136	13:54:00	0	1	1	12	51	38	55	24	42	45	37	6
cassava	f	311	129	15:20:00	1	0	0	4	28	30	57	43	40	68	33	7
watercress	f	311	145	13:57:00	0	1	0	6	21	30	102	39	32	63	14	3
nettle tea	b	309	83	13:30:00	2	0	3	19	50	45	50	34	44	34	21	7
idli	f	308	151	10:44:00	1	0	0	21	104	49	38	18	13	32	24	8
coca cola zero	b	308	81	16:34:00	2	2	1	3	11	17	60	42	65	53	36	16
cherry juice	b	307	115	17:28:00	5	3	3	10	28	32	30	31	31	57	63	14
malt	b	307	138	15:09:00	8	1	3	12	49	29	38	41	37	45	23	21
chex	f	306	135	12:16:00	3	1	3	30	68	46	44	11	31	33	21	15
ruccola	f	305	144	15:05:00	3	0	0	5	15	36	77	31	46	60	26	6
masala	f	304	198	16:34:00	5	0	0	2	17	25	69	32	36	65	41	12
tot	f	304	217	17:00:00	2	1	0	18	22	20	48	28	41	91	25	8
wasabi	f	303	178	16:38:00	2	2	1	5	9	27	40	53	48	72	35	9
sashimi	f	303	216	18:06:00	1	0	0	4	2	11	67	29	36	88	53	12
hamburger patty	f	303	202	16:07:00	0	0	0	2	10	31	81	27	46	80	21	5
ratatouille	f	302	169	17:30:00	3	0	0	3	3	25	72	22	41	91	40	2
hibiscus	b	301	112	14:30:00	0	0	0	15	35	39	53	30	54	36	30	9
aloe vera	f	301	88	11:38:00	4	1	11	54	54	37	27	27	21	24	20	21
cinnamon tea	b	300	96	14:24:00	4	5	7	15	47	34	40	39	31	41	28	9
sangria	b	300	196	19:04:00	5	1	0	0	1	0	17	34	47	107	67	21
medjool date	f	300	100	14:30:00	3	1	0	6	28	38	66	48	49	44	14	3
kraut	f	299	123	16:07:00	0	0	0	5	20	29	54	39	66	64	21	1
shallot	f	299	155	16:15:00	0	0	0	2	13	22	72	38	36	81	34	1
pasta sauce	f	299	177	17:52:00	0	0	0	4	6	17	53	20	57	110	24	8
yogurt fruit	f	298	125	11:49:00	1	0	2	28	72	52	46	27	26	34	8	2
sorbet	f	298	214	19:01:00	1	0	0	1	5	7	20	42	35	85	76	26
gherkin	f	297	151	14:08:00	1	0	0	5	11	26	100	47	41	51	15	0
pinot noir	b	296	119	19:02:00	0	0	1	2	3	2	14	14	56	128	65	11
double cream	f	296	68	13:50:00	1	1	11	32	35	34	39	32	22	54	28	7
garbanzo bean	f	296	145	15:54:00	1	0	0	8	15	28	71	28	46	79	15	5
guinness	b	295	121	18:48:00	9	1	0	0	2	4	18	28	57	95	62	19
pepper jack cheese	f	295	132	13:37:00	1	0	0	6	13	49	85	23	37	46	29	6
peanut butter pretzel	f	294	119	15:52:00	3	0	0	6	24	42	31	47	66	52	14	9
light beer	b	294	79	18:39:00	1	1	0	3	1	0	6	33	66	111	56	16
super green	b	293	96	12:17:00	3	0	5	50	38	41	60	30	32	21	7	6
slider	f	293	221	17:30:00	1	0	0	4	3	21	58	31	50	84	31	10
lemon cake	f	292	185	16:16:00	1	0	1	4	15	23	46	51	48	65	32	6
mochi	f	292	160	18:00:00	1	0	0	4	7	10	35	50	39	80	56	10
sausage patty	f	292	162	09:31:00	0	0	2	46	124	64	31	8	1	9	4	3
pot roast	f	292	207	17:29:00	4	3	0	0	2	25	45	18	72	91	22	10
broccolini	f	292	156	18:11:00	1	0	0	4	8	14	48	21	41	127	25	3
veal	f	291	207	17:39:00	1	1	2	1	5	10	69	28	42	91	37	4
mung bean	f	291	125	14:58:00	1	0	0	8	16	35	58	47	41	58	22	5
jelly sandwich	f	289	166	13:30:00	4	4	2	13	23	40	79	40	38	24	17	5
mushroom coffee	b	289	68	10:15:00	0	0	11	37	91	58	47	29	9	4	3	0
beef steak	f	289	162	17:18:00	5	0	0	10	9	21	56	26	36	86	35	5
sushi roll	f	289	220	16:31:00	4	0	1	2	3	17	77	39	36	71	33	6
sundried tomato	f	288	152	14:59:00	1	0	0	1	16	32	73	39	40	60	26	0
gingerbread	f	288	168	15:00:00	2	0	1	5	18	29	59	56	48	38	25	7
roast beef sandwich	f	287	217	13:35:00	2	3	1	3	6	45	99	44	20	40	17	7
sweet potato chip	f	287	197	17:30:00	6	5	1	0	6	18	48	42	38	86	28	9
lays	f	287	168	15:19:00	2	2	2	3	5	22	72	53	38	53	21	14
fennel tea	b	286	72	14:30:00	3	0	0	14	47	46	29	32	38	29	27	21
chowder	f	286	196	17:20:00	0	1	1	1	3	23	59	26	56	84	30	2
banana chip	f	285	127	15:45:00	2	0	1	1	14	26	52	56	54	41	26	12
blue cheese dressing	f	284	163	17:42:00	6	8	2	2	2	18	55	26	44	82	32	7
pomegranate juice	b	283	110	14:52:00	3	3	2	9	32	40	41	38	38	41	31	5
mountain dew	b	283	92	15:26:00	22	3	1	14	25	27	50	34	29	42	22	14
sparkling wine	b	281	117	19:12:00	3	3	1	1	1	8	11	23	46	80	87	17
curry rice	f	281	186	18:00:00	2	0	0	0	6	13	49	29	43	92	42	5
bison	f	279	154	16:17:00	1	1	1	8	8	31	54	33	39	77	22	4
salted caramel	f	279	144	15:03:00	0	1	4	23	20	24	49	39	27	42	41	9
farro	f	279	156	17:00:00	5	0	0	4	7	21	66	30	40	78	21	7
orzo	f	279	168	17:15:00	1	0	0	4	6	27	64	18	48	79	27	5
chicken liver	f	278	156	16:06:00	2	1	1	4	15	26	56	37	52	53	26	5
dark chocolate almond	f	278	100	15:53:00	4	1	3	6	13	27	39	53	46	50	31	5
butternut squash soup	f	277	167	14:11:00	1	0	0	1	8	26	96	35	38	44	22	6
pot sticker	f	277	219	17:35:00	3	2	0	6	5	25	38	27	66	76	24	5
kitkat	f	277	163	15:31:00	2	3	0	5	12	26	42	63	48	36	29	11
kohlrabi	f	276	134	14:56:00	1	0	0	9	16	27	70	32	50	53	15	3
mince pie	f	276	136	16:12:00	1	1	2	2	8	23	36	60	43	63	30	7
sesame oil	f	275	137	16:30:00	2	0	3	6	22	19	46	33	49	67	28	0
tomato juice	b	275	143	14:47:00	2	0	1	29	38	33	32	22	35	44	32	7
macaroon	f	274	179	16:30:00	1	2	0	0	8	23	40	50	48	55	36	11
red bush tea	b	274	47	15:24:00	5	5	2	13	34	32	33	36	36	49	18	11
dairy	b	273	108	14:39:00	2	3	1	9	30	51	37	28	37	32	35	8
evoo	f	272	97	16:34:00	1	0	0	10	16	25	52	25	42	65	23	13
gelatin	f	270	78	10:42:00	1	0	15	57	42	34	31	27	19	26	15	3
whole grain toast	f	269	101	09:57:00	0	0	1	46	88	52	34	12	13	20	2	1
mate tea	b	269	44	11:20:00	0	0	0	43	57	56	42	33	16	15	6	1
kalamata olive	f	268	113	16:42:00	5	0	1	5	6	26	60	32	34	59	27	13
pesto pasta	f	267	178	17:44:00	3	1	0	2	5	23	52	20	46	82	29	4
orange chicken	f	267	193	17:30:00	0	0	0	0	4	25	61	23	35	82	32	5
diet mountain dew	b	266	49	12:37:00	2	1	9	22	34	39	54	36	26	26	15	2
italian dressing	f	266	150	16:54:00	3	2	3	1	2	20	76	23	43	69	23	1
coffee mate	b	266	63	09:17:00	1	2	12	57	88	43	18	14	8	10	7	6
pork meat	f	266	128	14:20:00	4	0	0	1	4	33	85	37	28	50	15	9
keto bread	f	265	105	14:07:00	1	2	0	5	35	39	52	34	37	37	19	4
balsamic vinaigrette	f	265	115	14:23:00	1	0	0	0	6	24	91	25	28	59	27	4
fanta	b	265	151	17:11:00	8	2	0	2	17	13	47	34	36	53	43	10
crab cake	f	264	204	18:00:00	2	0	0	7	5	12	39	21	45	100	26	7
breakfast tea	b	263	43	10:20:00	1	0	2	45	74	51	30	24	14	10	10	2
turkey chili	f	263	135	17:00:00	1	0	4	6	5	17	62	29	41	71	18	9
formula	f	263	43	14:16:00	8	1	5	18	45	31	30	23	33	27	34	8
alfredo	f	262	176	17:35:00	3	3	1	0	6	14	38	30	64	69	26	8
beef soup	f	261	181	14:28:00	5	0	0	3	6	30	83	26	29	59	17	3
legume	f	261	105	17:01:00	2	1	0	2	10	15	63	26	24	56	46	16
coconut creamer	f	261	45	10:22:00	0	0	5	41	73	63	36	26	5	9	2	1
nettle	f	260	61	12:53:00	1	0	9	37	29	34	41	22	22	35	23	7
vegan burger	f	260	189	17:36:00	3	0	0	1	2	7	49	33	49	80	29	7
breakfast bar	f	258	92	10:06:00	0	2	2	29	90	58	19	27	16	10	5	0
tempura	f	258	212	18:16:00	2	1	0	2	1	13	54	20	27	90	40	8
chicken parmesan	f	258	189	17:45:00	0	0	2	1	2	24	47	15	50	90	25	2
caesar dressing	f	257	131	14:59:00	2	0	0	0	5	24	78	33	35	61	19	0
sweet n low	f	257	26	10:34:00	0	0	18	49	40	54	22	27	13	13	16	5
cheese burrito	f	257	163	14:02:00	1	0	1	7	22	24	71	33	32	36	17	13
marinara sauce	f	256	163	17:52:00	0	1	0	2	1	23	47	18	45	88	26	5
soylent	b	256	27	12:08:00	2	1	2	10	62	49	35	28	33	19	8	7
huel	b	255	50	13:04:00	2	0	1	14	35	32	70	32	32	17	15	5
chicken bone broth	f	255	109	14:05:00	0	4	0	9	29	35	52	31	46	38	8	3
satay	f	255	190	18:05:00	0	0	0	3	0	9	49	26	34	96	34	4
cheese sauce	f	255	170	17:30:00	1	2	0	2	5	17	47	20	60	76	21	4
beef liver	f	254	73	13:00:00	1	0	0	18	31	50	50	42	21	29	9	3
barbecue pork	f	253	183	17:20:00	4	4	0	2	9	17	52	23	35	79	25	3
lemon ginger tea	b	253	101	13:43:00	2	0	2	22	50	25	31	26	24	34	24	13
detox tea	b	253	87	12:24:00	1	0	5	23	50	45	25	20	17	31	28	8
sundae	f	253	200	19:00:00	2	2	0	1	1	5	28	30	29	72	68	15
clam chowder	f	252	200	15:40:00	3	0	0	2	5	28	72	21	47	55	16	3
teriyaki chicken	f	252	188	17:30:00	2	1	0	1	5	11	52	30	40	77	26	7
string bean	f	251	144	17:30:00	1	0	0	2	7	13	54	27	32	87	23	5
egg salad sandwich	f	251	166	13:00:00	4	0	0	3	6	44	111	40	19	15	7	2
whey protein shake	b	250	65	14:15:00	1	1	3	10	32	47	30	26	28	45	22	5
spaghetti sauce	f	250	153	18:00:00	3	1	0	1	5	23	33	10	51	103	18	2
mimosa	b	250	166	12:48:00	2	2	0	5	27	57	69	35	21	9	14	9
vin	b	249	89	18:15:00	3	0	0	11	16	8	34	19	24	84	42	8
breakfast sausage	f	248	133	10:23:00	0	1	1	38	65	67	39	11	6	16	2	2
energy ball	f	248	89	14:15:00	0	0	0	5	16	30	60	60	37	25	11	4
corona	b	248	123	18:45:00	6	3	1	2	0	4	17	20	42	88	44	21
kielbasa	f	248	155	17:10:00	0	0	1	8	15	16	46	25	38	77	19	3
bailey	b	248	133	18:30:00	8	1	0	7	32	19	11	10	33	42	51	34
cookie dough	f	248	135	16:49:00	2	0	1	2	7	25	31	42	35	58	38	7
golden milk	b	248	92	17:38:00	2	0	2	26	26	18	13	21	27	43	63	7
bean sprout	f	247	150	14:30:00	2	3	3	6	19	27	66	25	21	63	12	0
snow pea	f	247	145	17:30:00	1	1	0	0	5	19	58	16	40	86	21	0
gummy bear	f	247	139	16:26:00	2	8	7	4	9	18	39	33	39	40	35	13
fruit snack	f	246	149	15:10:00	2	2	1	0	14	33	53	41	51	20	21	8
spearmint	f	246	69	13:12:00	2	1	0	14	48	41	31	24	38	21	19	7
bruschetta	f	246	189	17:57:00	0	0	0	1	3	21	31	33	36	77	38	6
hard seltzer	b	246	78	18:22:00	3	2	0	1	0	6	13	24	65	86	35	11
split pea soup	f	244	147	16:00:00	2	0	0	1	1	23	67	29	42	57	20	2
goji	f	244	75	11:03:00	0	0	1	40	53	48	26	15	18	26	11	6
clove	f	244	79	13:03:00	2	3	5	23	48	31	28	23	29	36	13	3
broad bean	f	244	124	17:14:00	0	0	0	5	12	23	42	26	32	69	32	3
haddock	f	243	179	18:23:00	0	0	0	3	9	12	35	21	26	111	25	1
camembert	f	243	140	15:51:00	0	0	6	9	17	16	47	27	28	55	28	10
horseradish	f	243	134	14:40:00	1	0	0	10	17	27	53	29	37	51	16	2
rx	f	242	48	10:29:00	7	1	5	51	55	22	17	12	13	17	18	24
raspberry jam	f	242	113	12:14:00	1	2	0	18	56	42	29	26	20	24	18	6
cream sauce	f	241	170	18:13:00	1	1	0	2	4	4	55	18	30	88	34	4
cayenne	f	241	82	12:51:00	1	1	2	28	42	29	41	20	32	19	19	7
fromage	f	241	55	16:30:00	1	0	0	15	22	8	47	21	40	47	30	10
naked	b	241	119	13:54:00	1	2	3	9	18	29	65	34	26	32	15	7
poke	f	240	183	14:48:00	0	2	1	2	2	18	74	40	32	44	22	3
clam	f	240	186	18:02:00	1	0	0	3	3	7	41	29	36	83	32	5
orange squash	f	239	46	16:24:00	5	2	2	19	13	19	36	23	36	44	28	12
aloe	f	238	60	11:25:00	0	0	1	47	52	32	30	26	20	17	6	7
chow mein	f	238	171	17:30:00	0	0	0	1	1	16	43	29	42	81	22	3
arugula salad	f	238	155	17:34:00	0	0	0	3	3	15	48	23	42	81	21	2
wheat thins	f	238	126	16:14:00	3	1	1	2	6	28	36	34	57	32	22	16
lox	f	238	134	11:20:00	0	0	1	13	65	62	44	17	13	13	7	3
sage	f	238	87	13:05:00	2	0	3	25	47	25	35	22	22	36	18	3
ceviche	f	237	179	17:56:00	0	1	0	3	6	10	40	27	35	84	30	1
seitan	f	237	116	15:13:00	0	0	1	5	14	15	65	24	37	48	24	4
honey mustard	f	237	153	15:09:00	1	1	1	0	4	19	78	23	24	61	18	7
spanish rice	f	237	161	17:57:00	2	0	0	3	1	24	36	22	33	89	22	5
mango juice	b	236	141	16:04:00	3	0	0	10	24	17	44	20	25	54	28	11
beef broth	f	235	102	14:21:00	1	0	1	11	13	25	60	29	39	35	16	5
brain octane oil	b	235	31	09:34:00	0	0	3	55	66	38	25	11	9	17	9	2
jackfruit	f	234	130	16:30:00	1	0	0	9	9	12	52	26	36	53	23	13
long black	b	234	46	09:50:00	0	0	3	48	70	58	31	15	5	4	0	0
paella	f	234	175	16:25:00	0	0	0	0	3	12	45	51	26	68	26	3
lavender	f	233	101	16:54:00	9	3	1	10	15	29	31	27	22	25	37	24
squash soup	f	233	147	15:28:00	1	0	1	2	7	11	72	28	35	58	16	2
parmigiana	f	233	160	18:09:00	1	1	0	3	4	12	38	14	30	101	25	4
gazpacho	f	232	99	14:40:00	0	0	0	1	11	18	59	56	20	46	16	5
baklava	f	232	156	17:32:00	2	0	0	8	15	14	33	29	25	52	41	13
craisins	f	231	87	13:15:00	1	1	1	17	30	25	50	34	29	33	8	2
blueberry yogurt	b	230	123	12:34:00	0	0	3	15	49	34	39	24	20	31	13	2
onion soup	f	228	182	16:51:00	1	0	0	0	3	11	50	42	40	54	21	6
sun dried tomato	f	228	113	15:35:00	1	0	0	4	8	26	58	22	30	51	22	6
collard	f	228	114	14:10:00	0	0	1	7	19	32	51	31	26	48	9	4
coconut flour	f	228	85	12:45:00	7	1	5	7	46	30	44	20	29	30	6	3
premier protein	b	228	59	10:04:00	2	0	2	43	65	35	29	20	11	12	8	1
port	b	228	132	19:16:00	4	2	1	2	3	5	12	19	37	57	69	17
bud light	b	227	61	19:14:00	8	7	5	1	5	4	12	17	33	64	46	25
fresca	b	227	88	16:30:00	3	1	0	15	4	14	40	31	38	48	24	9
octopus	f	227	187	18:15:00	2	1	0	0	3	6	51	25	24	59	49	7
chocolate almond milk	b	227	55	13:05:00	2	1	3	38	37	22	22	17	21	27	27	10
weet bix	f	227	63	08:37:00	1	1	0	92	79	12	5	13	13	4	5	2
oreo cookie	f	227	133	15:51:00	3	2	0	1	12	21	40	45	31	37	30	5
avocado sandwich	f	227	161	13:08:00	2	0	0	11	26	47	76	19	16	24	6	0
mexican rice	f	226	133	17:20:00	3	1	0	3	6	19	49	20	34	67	23	1
caviar	f	226	100	12:32:00	0	0	6	23	36	37	43	13	22	23	14	9
perfect bar	f	226	75	13:28:00	0	0	0	22	36	34	33	42	38	13	7	1
linguine	f	225	159	18:00:00	2	0	0	2	3	7	37	26	37	85	24	2
fish soup	f	225	146	16:54:00	1	0	2	1	4	16	52	23	43	57	21	5
cutlet	f	225	153	17:24:00	0	0	0	5	6	14	37	26	41	58	33	5
soba	f	225	146	17:30:00	1	0	0	2	5	13	48	24	35	73	21	3
mio	b	224	43	13:32:00	1	1	4	27	22	31	41	35	21	20	15	6
bloody mary	b	224	157	13:30:00	1	0	2	5	14	47	53	31	26	30	14	1
fish finger	f	224	166	17:58:00	2	1	0	0	0	10	43	22	38	84	19	5
vegan pizza	f	224	161	18:17:00	3	0	2	0	6	8	28	17	38	85	28	9
shakeology	b	223	36	11:59:00	0	0	2	23	38	49	44	25	26	11	4	1
cobbler	f	223	156	18:01:00	3	0	1	6	5	8	40	20	30	60	39	11
chicken finger	f	223	174	16:47:00	1	1	0	0	1	14	54	32	33	56	22	9
turkey wrap	f	223	128	13:18:00	1	0	0	1	4	26	101	39	16	19	9	7
butter bean	f	223	124	17:15:00	1	0	0	6	5	11	54	28	27	68	23	0
caffee	b	223	27	12:35:00	0	0	1	20	38	40	52	34	28	7	3	0
root vegetable	f	222	128	17:00:00	0	0	0	2	3	19	56	25	21	73	20	3
aioli	f	222	145	17:00:00	1	0	0	1	4	21	48	25	38	61	20	3
breakfast smoothie	b	221	59	09:30:00	2	0	3	41	88	64	11	5	4	2	1	0
black bean burger	f	221	146	17:13:00	2	0	1	0	5	24	52	13	45	61	14	4
gorgonzola	f	221	134	16:24:00	2	1	1	4	7	18	48	23	38	60	18	1
redbush	b	221	39	14:19:00	1	1	0	24	39	22	17	35	20	18	29	15
tri tip	f	221	131	18:00:00	1	0	2	1	6	14	34	16	33	92	21	1
bullet coffee	b	220	32	08:28:00	0	0	20	65	72	31	13	12	6	1	0	0
shawarma	f	220	175	16:06:00	2	0	0	5	2	9	60	32	24	60	21	5
bacon egg cheese	f	220	137	09:32:00	0	0	3	47	79	53	23	1	6	4	3	1
sheep cheese	f	219	79	14:26:00	0	0	1	6	26	23	42	29	31	32	27	2
pork steak	f	218	133	17:24:00	2	0	0	1	3	7	39	34	36	65	24	7
hazelnut creamer	b	218	30	10:28:00	1	0	1	38	60	49	33	19	11	1	3	2
liver pate	f	218	95	13:55:00	4	0	0	10	29	26	45	26	19	39	16	4
keto coffee	b	218	39	09:24:00	1	5	16	40	62	44	20	15	7	2	2	4
fruit bowl	f	218	97	11:41:00	1	2	1	29	32	53	33	19	17	18	11	2
granny smith apple	f	217	67	14:30:00	1	1	0	4	17	34	36	48	33	19	16	8
kale chip	f	217	135	16:07:00	1	2	0	3	9	22	38	34	38	36	25	9
ryvita	f	216	91	14:32:00	1	0	0	7	11	23	56	49	27	29	10	3
acai bowl	f	216	134	13:24:00	2	0	0	4	32	36	50	30	23	23	13	3
buttered toast	f	215	82	11:02:00	1	1	4	22	60	30	26	18	12	19	18	4
sausage link	f	215	127	11:10:00	1	0	0	25	53	45	33	13	14	14	14	3
barbecue chip	f	215	149	15:00:00	1	0	1	1	3	17	65	41	27	31	25	3
portabella mushroom	f	215	143	17:00:00	1	0	0	2	4	13	48	30	33	59	18	7
vanilla creamer	b	214	39	09:59:00	1	0	3	26	78	46	23	12	13	3	8	1
actimel	b	214	46	10:18:00	0	0	5	35	60	43	26	18	11	4	9	3
beef bone broth	f	213	80	12:56:00	1	0	2	17	32	32	51	27	20	19	12	0
nori	f	213	111	15:17:00	2	0	1	11	14	13	44	31	36	37	19	5
mulberry	f	212	58	12:58:00	0	1	4	14	35	27	39	29	31	28	4	0
garbanzo	f	212	102	14:30:00	0	0	0	3	7	18	63	35	41	38	3	4
ipa beer	b	211	79	18:30:00	2	1	0	2	1	2	11	16	55	67	39	15
old fashioned	b	211	101	17:14:00	3	0	0	29	23	12	17	11	25	51	27	13
wheat germ	f	210	40	09:58:00	0	0	5	24	77	13	33	12	16	16	11	3
wheatgrass	b	210	70	11:22:00	0	0	4	26	43	44	36	21	15	14	7	0
jicama	f	209	99	14:19:00	0	0	0	5	10	39	47	23	22	47	14	2
big mac	f	209	164	16:09:00	5	2	2	2	2	15	48	34	29	42	20	8
broccoli slaw	f	209	92	14:34:00	1	2	0	1	2	20	77	13	33	43	13	4
iceberg lettuce	f	209	105	15:22:00	2	0	0	2	7	21	61	24	23	46	20	3
yerba mate tea	b	208	53	11:31:00	0	0	1	20	44	44	40	23	11	21	2	2
pom	b	208	59	13:49:00	0	0	0	25	32	22	30	27	23	28	12	9
beef sausage	f	208	117	15:25:00	1	0	2	9	21	34	27	19	35	43	14	3
bologna	f	208	99	13:49:00	5	2	1	2	8	22	74	24	19	33	11	7
sloppy joe	f	208	150	17:19:00	1	0	0	0	0	12	50	16	49	56	22	2
jelly bean	f	208	104	16:28:00	1	0	1	1	8	26	27	32	35	42	29	6
halibut	f	207	160	18:31:00	0	1	0	0	3	10	20	7	34	102	27	3
flan	f	207	139	17:15:00	2	2	0	1	8	9	30	34	32	40	38	11
m and ms	f	207	119	16:13:00	0	1	0	0	9	24	25	42	31	34	30	11
udon	f	207	160	17:25:00	2	0	1	3	2	14	54	18	26	54	27	6
whopper	f	207	165	15:28:00	0	1	0	3	3	17	57	31	34	36	22	3
tamari	f	206	91	16:16:00	1	0	0	0	7	13	45	30	39	51	16	4
curcuma	f	205	49	11:33:00	0	0	3	39	32	36	28	17	7	25	14	4
cayenne pepper	f	205	65	12:09:00	10	0	1	25	46	27	33	14	10	26	7	6
chocolate truffle	f	204	108	16:09:00	0	2	1	6	10	17	24	42	29	36	29	8
dragon fruit	f	204	109	13:12:00	0	0	1	11	31	24	45	31	22	22	13	4
pomelo	f	203	106	16:06:00	0	1	0	5	12	25	29	29	32	43	21	6
cabernet	b	203	78	19:22:00	0	1	1	0	1	2	7	5	29	84	55	18
coconut sugar	f	203	62	10:39:00	5	4	1	45	45	29	24	12	12	17	8	1
prime rib	f	202	157	18:08:00	2	0	0	0	2	10	30	17	34	83	20	4
peanut sauce	f	202	148	17:13:00	1	0	0	1	3	11	41	32	31	66	14	2
merlot	b	202	84	19:14:00	1	0	1	2	3	0	9	7	33	75	54	17
tabbouleh	f	202	109	15:18:00	4	0	1	1	7	19	50	29	21	44	20	6
chex mix	f	201	118	15:14:00	5	0	0	4	7	29	38	33	36	25	15	9
white claw	b	200	59	18:36:00	2	0	0	0	1	7	15	22	33	65	39	16
nuun	b	199	56	11:54:00	0	0	0	30	31	40	36	15	19	12	11	5
vegetable broth	f	199	102	16:20:00	1	2	0	3	5	21	48	19	24	51	20	5
parfait	f	198	94	13:18:00	2	1	0	7	33	36	33	26	24	24	8	4
hemp milk	b	198	65	09:55:00	0	1	7	18	75	35	17	15	12	11	4	3
dijon mustard	f	198	96	16:04:00	0	0	0	3	2	12	54	27	32	51	13	4
hershey kiss	f	198	92	15:04:00	1	0	0	0	8	23	46	38	23	31	20	8
celeriac	f	196	109	17:51:00	1	0	0	1	1	12	40	26	26	72	14	3
green powder	b	196	57	11:01:00	0	3	12	30	32	40	27	17	18	9	3	5
pastrami	f	195	135	13:45:00	0	0	0	3	16	31	53	36	18	25	9	4
lindt chocolate	f	195	82	17:06:00	4	0	0	0	6	15	30	28	27	38	33	14
natto	f	195	64	13:06:00	0	0	1	5	43	26	37	27	19	23	11	3
puer tea	b	195	38	11:00:00	0	0	7	17	65	22	37	15	13	10	7	2
artichoke heart	f	195	114	15:19:00	2	1	0	1	11	13	57	23	24	48	13	2
sabji	f	194	41	14:19:00	0	0	0	4	30	18	31	40	10	22	32	7
cheese curd	f	194	117	15:50:00	0	0	1	1	6	14	38	39	27	45	18	5
egg yolk	f	193	76	12:31:00	2	0	1	18	35	29	33	23	19	19	10	4
lmnt	b	193	35	12:32:00	0	0	7	21	27	30	24	28	15	23	17	1
mint chocolate	f	192	94	17:06:00	1	0	1	4	13	7	30	21	35	44	31	5
vegetable burrito	f	192	139	15:54:00	0	2	0	0	8	18	48	23	30	44	14	5
yakult	b	192	51	11:42:00	1	0	2	19	44	33	27	16	21	17	7	5
corn dog	f	192	152	15:11:00	2	3	1	8	4	24	40	29	24	39	10	8
stout	b	192	94	18:40:00	6	0	0	1	0	2	13	19	35	70	40	6
gyoza	f	192	148	17:57:00	2	2	0	1	6	8	31	29	22	62	24	5
red sauce	f	191	130	18:06:00	1	1	2	1	0	12	32	18	24	82	14	4
beet juice	b	191	88	11:08:00	1	1	3	18	48	43	31	23	5	11	3	4
turmeric latte	b	191	82	15:05:00	0	0	0	11	16	24	27	36	25	29	22	1
mutton	f	190	90	16:30:00	2	0	0	0	7	6	37	41	12	35	40	10
brazilian nut	f	189	59	13:48:00	1	0	0	6	29	29	36	19	34	22	11	2
cheese puff	f	189	108	16:16:00	3	1	2	2	4	17	36	25	42	36	15	6
meat pie	f	189	135	16:05:00	0	0	2	2	8	11	50	20	24	50	19	3
vegetable straw	f	188	86	15:02:00	1	0	0	0	3	22	52	33	34	20	15	8
blood orange	f	187	101	14:04:00	0	1	2	7	12	31	41	24	28	20	14	7
red rice	f	187	83	15:35:00	0	0	1	1	12	7	52	21	21	43	28	1
kettle corn	f	186	115	16:39:00	2	0	0	0	5	10	14	44	50	21	22	18
flax milk	b	186	43	10:29:00	0	0	0	12	66	39	28	11	11	8	7	4
spritzer	b	186	59	18:18:00	1	0	0	3	2	2	5	25	46	69	28	5
beef stroganoff	f	186	130	18:02:00	0	0	0	1	4	8	33	13	32	72	19	4
cheese dip	f	186	119	17:59:00	4	0	1	0	3	10	23	23	33	54	25	10
cranberry sauce	f	185	110	17:08:00	1	0	3	1	5	15	30	24	34	61	10	1
protein cookie	f	185	78	13:14:00	1	2	6	8	34	28	29	25	20	18	9	5
soft drink	b	185	78	17:20:00	4	1	0	1	6	9	31	27	27	45	28	6
pasty	f	185	125	14:18:00	1	0	0	1	3	10	68	37	14	33	15	3
amaranth	f	185	72	12:10:00	0	0	0	27	33	28	32	19	10	26	10	0
pico de gallo	f	185	118	14:47:00	5	0	0	2	12	33	33	23	27	34	11	5
pot pie	f	184	142	17:40:00	2	1	0	2	2	7	33	14	42	59	17	5
apple crisp	f	184	115	17:49:00	0	0	0	5	9	10	27	16	30	54	27	6
oatmeal raisin cookie	f	184	103	14:16:00	0	0	1	4	17	19	44	34	19	22	21	3
black eyed pea	f	184	103	15:56:00	0	0	0	2	4	14	40	33	27	42	20	2
brandy	b	183	96	19:36:00	3	0	0	1	1	7	12	11	15	62	42	29
deer	f	183	81	16:12:00	1	0	4	12	8	12	30	22	19	44	23	8
beef brisket	f	182	109	17:04:00	0	0	0	3	3	17	37	23	24	57	15	3
goldfish	f	181	112	16:04:00	6	1	0	2	4	22	26	35	34	22	19	10
protein yogurt	f	181	70	14:11:00	3	1	0	8	19	30	31	21	23	25	13	7
kettle chip	f	181	101	15:30:00	1	1	0	0	5	11	47	32	26	35	15	8
propel	b	181	42	15:34:00	1	1	0	10	18	15	30	27	22	37	9	11
vegan ice cream	f	181	107	18:56:00	1	0	0	2	2	3	15	16	27	54	51	10
thyme	f	180	91	16:26:00	3	0	1	4	13	16	31	17	27	46	16	6
cottage pie	f	180	121	17:58:00	0	0	1	1	2	4	36	11	36	70	16	3
taquito	f	180	136	16:52:00	2	0	1	5	9	17	28	21	27	38	22	10
chipotle chicken	f	180	125	15:02:00	2	2	0	1	2	10	58	27	24	32	18	4
sprouted bread	f	179	49	11:39:00	1	0	3	23	37	30	28	19	21	11	5	1
chicken stew	f	179	110	16:21:00	0	1	0	1	4	17	41	21	17	49	23	5
oatly	b	178	29	12:00:00	1	0	2	18	37	32	26	18	9	14	17	4
hempseed	f	178	53	10:32:00	0	0	1	20	52	34	22	16	15	15	3	0
ham cheese sandwich	f	178	106	13:24:00	0	0	0	4	14	28	60	32	12	20	7	1
mahi mahi	f	178	132	17:58:00	0	0	0	2	0	5	28	22	33	62	20	6
cocoa nib	f	178	62	12:18:00	1	0	0	12	44	27	30	23	15	15	10	1
miller lite	b	177	40	18:04:00	3	1	0	0	2	6	12	20	41	58	25	9
acorn squash	f	177	111	17:45:00	0	0	0	3	5	14	24	13	35	64	15	4
macaroni salad	f	177	122	16:25:00	0	1	1	3	2	14	47	20	35	46	8	0
hemp protein	f	176	54	12:13:00	3	4	0	21	32	27	36	21	13	10	7	2
sauvignon blanc	b	176	61	18:38:00	2	0	1	2	0	1	11	4	42	83	25	5
pound cake	f	176	110	17:23:00	2	0	1	3	11	15	20	21	27	43	25	8
praline	f	176	95	16:04:00	0	0	0	3	5	16	28	35	33	29	23	4
upma	f	176	107	10:39:00	0	0	0	6	61	42	21	5	5	16	18	2
sweet bread	f	176	99	13:54:00	3	2	0	11	21	33	24	23	15	29	12	3
mascarpone	f	175	96	17:20:00	3	0	0	5	19	9	20	19	25	49	22	4
scampi	f	175	138	18:20:00	1	0	0	0	2	4	27	20	23	67	29	2
bircher muesli	f	175	52	09:30:00	0	0	0	20	90	34	18	5	2	4	2	0
cream of wheat	f	175	91	09:07:00	0	1	1	45	61	34	14	4	5	6	3	1
jambalaya	f	175	104	17:37:00	1	1	0	1	3	15	34	20	26	55	17	2
powerade zero	b	175	41	13:08:00	2	0	1	22	27	25	23	20	21	18	11	5
tenderloin	f	175	119	17:29:00	3	1	1	0	5	6	42	24	20	48	18	7
fettuccine	f	173	118	17:37:00	1	0	0	3	3	12	35	13	33	53	16	4
cow milk	b	173	48	12:11:00	0	1	2	12	31	37	24	19	34	7	5	1
tostitos	f	173	96	17:00:00	2	0	0	2	2	7	24	33	36	37	17	13
almond latte	b	173	50	10:57:00	1	0	2	17	43	41	26	26	13	3	0	1
tapa	f	173	139	18:53:00	1	0	0	0	3	5	18	21	17	55	47	6
arroz	f	172	61	15:22:00	0	0	1	3	2	7	55	23	15	30	28	8
sake	b	171	131	19:05:00	1	0	1	2	3	0	6	8	22	79	39	10
sour milk	b	171	49	09:54:00	0	0	4	43	42	19	12	11	14	13	10	3
sleepy time	b	171	69	20:34:00	2	3	2	2	1	0	0	0	9	55	73	24
pinot grigio	b	171	78	18:55:00	3	0	0	0	0	1	9	8	32	68	41	9
lingonberry	f	170	72	12:11:00	0	0	1	31	31	17	30	8	18	26	8	0
vegetable patty	f	170	93	14:30:00	0	0	2	4	18	16	39	18	19	33	15	6
honeydew	f	170	88	12:57:00	1	1	1	11	26	33	26	21	22	20	6	2
dim sum	f	170	125	13:25:00	2	0	0	1	10	25	61	21	14	24	10	2
calzone	f	170	125	18:27:00	0	1	0	2	5	13	24	9	24	66	24	2
molasses	b	169	70	11:52:00	1	7	1	16	34	36	13	19	14	12	11	5
coconut chip	f	169	83	15:43:00	0	0	0	3	14	24	24	24	38	18	20	4
dunkin	f	168	66	10:51:00	0	1	2	23	48	28	21	22	11	6	6	0
meringue	f	168	106	18:16:00	2	0	0	0	4	7	15	23	23	50	37	7
chicken tikka masala	f	168	118	17:54:00	2	1	0	0	0	7	41	19	20	57	17	4
plant protein	f	168	44	10:45:00	4	3	1	39	30	24	11	16	10	12	17	1
endive	f	168	85	16:39:00	0	1	0	1	10	8	46	17	14	53	14	4
soybean	f	167	68	15:05:00	1	2	1	10	11	15	34	18	32	26	10	7
diet root beer	b	167	60	17:30:00	0	1	0	0	4	9	26	22	30	43	26	6
ginger juice	b	167	86	12:28:00	0	0	2	12	32	27	31	19	21	19	4	0
zucchini noodle	f	167	111	18:10:00	0	0	0	2	3	7	21	11	35	70	15	3
corn tortilla chip	f	166	75	17:00:00	1	0	1	0	5	9	39	16	39	40	13	3
taco meat	f	166	115	16:17:00	1	2	0	2	4	22	32	20	23	45	11	4
ginger water	b	166	50	13:16:00	2	0	3	14	42	16	11	14	14	16	20	14
cafe au lait	b	166	31	10:13:00	0	0	1	21	46	44	22	19	6	5	2	0
moong	f	166	57	15:19:00	1	0	1	2	19	7	32	31	13	27	31	2
sun chip	f	166	108	14:44:00	1	1	0	0	0	15	56	39	20	18	12	4
shrimp taco	f	165	143	16:59:00	0	0	0	1	1	8	41	20	23	57	12	2
gratin	f	165	111	17:33:00	0	0	1	0	2	11	29	22	21	56	19	4
radicchio	f	164	77	15:03:00	0	0	0	0	6	11	53	22	18	36	16	2
shiitake mushroom	f	164	99	16:07:00	1	0	1	1	6	18	37	19	26	38	17	0
moscow mule	b	164	110	19:00:00	6	4	1	2	4	1	4	6	30	60	38	8
creme brulee	f	164	137	19:45:00	4	1	0	1	1	3	15	15	11	44	61	8
chicken fried rice	f	164	114	17:47:00	2	0	1	1	1	18	27	14	25	50	19	6
egg noodle	f	163	121	17:42:00	0	0	0	1	5	5	30	18	27	59	17	1
black bean soup	f	163	94	14:50:00	1	0	0	3	1	15	53	18	26	38	8	0
cauliflower cheese	f	163	107	18:00:00	0	0	0	0	1	7	29	19	25	57	21	4
burger patty	f	162	102	18:04:00	3	3	0	6	1	4	24	15	29	51	22	4
krispies	f	162	78	11:13:00	0	1	3	25	31	32	24	13	10	13	7	3
daikon	f	162	83	15:51:00	1	0	0	1	25	6	26	24	28	36	12	3
egg scramble	f	162	74	10:09:00	0	0	2	28	47	43	19	7	9	3	4	0
skittle	f	162	105	16:42:00	5	0	1	1	4	14	23	30	23	30	21	10
lentil pasta	f	161	88	17:10:00	0	0	1	0	3	11	42	13	30	43	18	0
lolly	f	161	93	16:18:00	2	2	0	2	3	16	23	31	21	33	23	5
honey nut cheerio	f	161	82	11:03:00	1	4	0	23	43	20	13	5	11	14	15	12
ricotta cheese	f	161	82	13:39:00	0	0	0	11	16	16	43	14	15	33	11	2
vermicelli	f	161	103	14:39:00	1	1	0	6	8	21	37	16	18	31	20	2
frosted mini wheat	f	161	52	11:00:00	1	2	0	28	41	21	15	8	9	17	11	8
seaweed salad	f	160	129	17:24:00	0	0	0	0	2	10	30	27	28	43	18	2
salmon fillet	f	160	110	18:17:00	1	0	0	1	2	3	20	23	27	53	26	4
pulled pork sandwich	f	160	132	17:37:00	1	1	0	0	2	11	28	13	35	50	15	4
green shake	b	159	37	10:59:00	1	0	0	28	30	40	22	17	12	8	1	0
havarti cheese	f	158	83	14:32:00	2	0	0	3	9	24	37	27	20	19	13	4
biltong	f	158	76	15:29:00	3	0	0	1	10	17	26	33	34	24	9	1
domino	f	158	93	18:06:00	1	2	0	1	0	6	24	18	28	50	23	5
pain au chocolate	f	157	104	10:14:00	0	0	0	17	53	39	14	13	10	7	3	1
saag	f	157	99	18:13:00	0	0	0	1	3	9	33	12	13	56	23	7
croquette	f	157	121	16:00:00	1	2	0	0	5	14	29	30	20	36	17	3
vegan chili	f	157	79	16:11:00	0	0	0	2	2	9	50	14	29	38	9	4
curry sauce	f	157	116	17:51:00	2	1	2	1	1	7	39	6	24	54	17	3
lipton	b	156	45	15:30:00	5	4	3	5	13	13	22	28	27	13	18	5
club sandwich	f	156	135	13:40:00	0	0	1	2	2	11	71	23	22	16	5	3
milo	b	156	64	15:30:00	1	2	4	6	16	10	20	29	18	21	21	8
fish pie	f	156	114	18:31:00	0	0	0	2	2	7	12	4	34	65	30	0
burger king	f	156	116	15:43:00	0	0	0	2	7	11	33	28	22	25	19	9
rocket salad	f	156	79	14:26:00	0	0	0	1	3	16	52	25	11	34	12	2
colby jack cheese	f	156	66	14:59:00	0	2	0	6	10	13	31	33	23	25	7	6
spinach dip	f	156	109	16:55:00	0	0	1	1	3	14	20	26	32	34	19	6
popeyes	f	155	77	16:54:00	0	2	2	0	2	13	31	10	33	37	20	5
key lime pie	f	155	110	18:40:00	0	0	0	0	3	11	19	18	16	37	46	5
tisane	b	155	31	17:00:00	2	1	2	3	22	9	14	19	17	14	36	16
cherry pie	f	155	104	17:13:00	1	0	0	3	12	7	25	19	20	41	20	7
dark chocolate chip	f	155	66	16:17:00	2	0	0	0	11	15	26	20	26	30	20	5
cheese spread	f	155	72	14:19:00	4	4	3	14	13	15	29	18	21	23	10	1
peanut butter bar	f	155	70	14:59:00	0	10	2	9	16	20	22	20	23	14	17	2
flax meal	f	155	39	10:09:00	0	0	0	29	46	24	24	8	14	9	0	1
bouillon	b	155	55	13:49:00	0	3	0	3	20	38	17	21	23	16	11	3
poha	f	154	84	10:22:00	0	0	0	4	63	32	17	9	9	14	6	0
keto bar	f	154	58	14:07:00	0	1	0	1	16	27	30	36	17	16	6	4
amla	f	154	32	11:18:00	0	0	4	19	34	31	19	15	16	12	4	0
balsamic dressing	f	153	94	17:13:00	1	0	2	1	4	21	33	6	17	53	13	2
toastie	f	153	107	13:30:00	0	1	1	7	10	15	61	25	11	14	7	1
garlic sauce	f	153	114	17:51:00	1	1	2	1	7	7	28	14	24	54	11	3
bacon bit	f	153	75	16:30:00	0	0	0	2	8	11	44	8	24	45	7	4
carne asada	f	153	117	17:19:00	1	0	1	3	3	17	31	8	25	40	21	3
lassi	b	153	94	16:43:00	0	0	0	3	5	15	26	24	13	51	12	4
tuna melt	f	153	108	15:05:00	0	0	0	1	4	11	45	31	24	29	5	3
diet ginger ale	b	153	66	17:23:00	1	2	0	1	9	11	21	22	28	32	17	9
arnold palmer	b	152	72	15:22:00	2	0	0	1	7	18	33	24	21	23	18	5
cherry coke	b	152	75	15:12:00	0	1	2	1	8	15	33	21	21	29	13	8
katsu	f	152	110	17:53:00	2	0	0	2	1	7	38	17	16	49	18	2
ice lolly	f	152	79	17:56:00	0	0	0	1	0	2	22	18	34	36	30	9
san pellegrino	b	150	64	16:27:00	2	0	0	5	6	10	37	15	17	42	13	3
nutpod	b	150	15	09:46:00	0	0	12	28	41	23	23	12	3	8	0	0
michelob ultra	b	150	44	18:20:00	1	0	1	0	3	3	6	6	36	65	21	8
topo chico	b	149	38	17:23:00	1	0	1	3	12	8	20	25	15	24	29	11
baked vegetable	f	149	82	17:30:00	1	0	0	1	5	8	33	13	29	38	20	1
chicken alfredo	f	149	114	18:05:00	1	0	1	2	1	7	26	10	25	55	19	2
waffle fry	f	148	127	16:46:00	2	0	0	1	1	12	40	13	27	35	14	3
gumbo	f	148	95	14:30:00	2	0	1	3	3	9	51	12	23	30	11	3
sponge cake	f	148	90	15:44:00	0	0	6	3	7	9	18	35	28	19	21	2
fairlife	b	148	30	13:12:00	3	1	0	15	32	13	20	22	17	14	9	2
orange pepper	f	148	84	16:02:00	1	0	0	2	4	3	50	15	19	44	10	0
chicken pie	f	148	110	17:35:00	1	0	1	0	3	8	24	16	29	52	11	3
korma	f	147	87	17:50:00	0	0	0	0	1	6	35	16	19	46	20	4
protein bread	f	147	43	13:20:00	0	0	1	14	11	32	24	13	12	21	14	5
ginger cookie	f	147	76	15:15:00	0	0	0	5	12	10	30	29	11	24	21	5
sunflower butter	f	147	55	13:59:00	0	0	3	7	20	18	26	22	12	18	16	5
chicharron	f	146	61	15:32:00	1	2	1	1	6	13	31	28	32	20	6	5
cheezits	f	146	81	15:34:00	1	3	1	2	5	15	27	28	29	18	13	4
ginger shot	b	146	62	09:40:00	0	0	1	24	53	19	15	10	10	12	1	1
borscht	f	146	69	15:40:00	0	0	0	0	6	9	41	21	24	29	13	3
nutmeg	b	146	49	10:02:00	0	1	11	30	31	21	14	12	3	15	6	2
melt	f	145	97	13:37:00	2	3	0	7	10	21	43	17	9	24	6	3
soy cappuccino	b	145	31	10:07:00	0	0	0	25	44	39	20	10	5	1	1	0
chicken patty	f	145	95	16:20:00	1	0	0	9	5	15	22	18	32	28	10	5
black pudding	f	145	91	11:15:00	1	0	0	5	33	41	30	9	8	12	4	2
shiitake	f	145	79	14:03:00	0	0	0	10	8	20	32	20	16	26	10	3
mojito	b	145	113	19:00:00	0	1	0	1	0	2	15	5	28	52	28	13
cabernet sauvignon	b	144	46	19:14:00	2	1	0	0	0	1	2	7	27	50	36	18
burrata	f	144	108	18:33:00	1	0	0	1	1	5	19	13	19	55	26	4
turkey meat	f	144	81	15:56:00	0	0	1	6	8	18	26	14	26	30	10	5
crema	f	143	52	14:14:00	2	0	0	17	15	23	14	16	13	27	8	8
bread pudding	f	143	110	17:00:00	0	2	1	1	14	9	18	20	15	33	26	4
eggnog	b	143	77	16:58:00	1	0	2	6	7	13	12	19	24	31	19	9
masala tea	b	143	26	11:22:00	3	0	2	16	30	38	12	7	20	9	3	3
torta	f	142	90	16:00:00	1	0	0	8	8	15	21	18	26	27	12	6
sticky rice	f	142	87	17:34:00	0	0	0	3	9	12	25	14	17	41	15	6
milk kefir	b	142	32	13:58:00	0	0	3	14	21	20	14	20	12	14	17	7
spam	f	142	97	13:08:00	0	1	2	10	19	23	24	10	13	25	12	3
charcuterie	f	142	102	17:47:00	2	2	0	1	7	8	24	12	21	39	24	2
bisque	f	142	109	17:36:00	4	1	0	0	1	10	30	9	30	34	21	2
bang	b	142	58	13:51:00	3	1	1	16	12	16	29	18	16	19	10	1
flank steak	f	141	92	17:45:00	0	0	1	1	3	11	25	8	28	50	13	1
keto ice cream	f	141	54	18:30:00	2	3	1	0	2	6	8	18	21	54	20	6
chocolate spread	f	140	63	13:28:00	1	0	0	10	21	23	26	16	13	11	14	5
caramel latte	b	140	49	09:45:00	1	0	1	30	43	34	10	11	6	1	2	1
ginger snap	f	140	76	17:18:00	1	1	1	0	5	11	21	27	12	34	22	5
catfish	f	140	102	17:24:00	4	0	0	0	3	9	30	16	21	39	14	4
baba ganoush	f	140	82	15:46:00	2	0	0	3	4	11	36	17	21	29	15	2
blueberry jam	f	140	72	12:01:00	0	0	2	10	26	32	12	10	19	21	6	2
chicken tortilla soup	f	140	100	16:20:00	1	0	0	1	1	11	42	13	22	37	11	1
kool aid	b	139	36	17:36:00	6	1	1	1	3	9	17	18	24	29	15	15
green lentil	f	139	69	16:40:00	1	0	0	1	1	13	30	22	16	48	6	1
cinnamon toast	f	138	87	09:52:00	0	1	1	15	56	23	7	5	8	6	12	4
yogurt parfait	f	138	64	11:00:00	0	0	0	15	37	29	19	11	7	10	7	3
smoked sausage	f	138	77	16:48:00	2	4	2	4	11	14	24	9	23	34	7	4
pink salt	f	138	31	12:49:00	8	2	7	28	14	15	22	10	14	11	4	3
bolognese sauce	f	138	86	16:50:00	1	1	0	1	3	10	30	19	19	33	18	3
ginger root	f	137	34	11:56:00	0	6	4	16	25	24	17	12	9	15	7	2
beer ipa	b	137	29	18:32:00	0	2	0	1	0	0	10	15	29	45	25	10
amino energy	b	137	19	10:05:00	1	2	10	22	36	22	15	8	15	5	1	0
congee	f	137	54	12:45:00	0	0	0	11	26	22	24	7	11	26	8	2
egg burrito	f	137	96	10:39:00	0	0	0	13	42	36	22	8	1	7	7	1
semolina	f	137	83	13:16:00	0	0	0	3	13	31	32	10	12	24	12	0
fig newton	f	136	71	14:44:00	2	0	0	3	11	11	32	24	24	15	13	1
liverwurst	f	136	53	14:05:00	0	0	3	4	15	14	31	21	23	20	4	1
colby cheese	f	136	67	14:31:00	0	0	2	4	11	13	30	17	21	22	11	5
animal cracker	f	136	82	16:21:00	2	2	1	0	5	9	26	21	22	23	18	7
biscoff	f	136	73	15:17:00	1	1	1	2	10	15	21	27	15	27	11	5
diet cola	b	136	41	16:00:00	1	0	0	0	6	8	28	25	27	29	8	4
espresso macchiato	b	136	15	08:59:00	1	0	0	58	23	23	11	10	4	2	1	3
kinder	f	136	81	16:16:00	0	1	1	1	3	13	19	27	25	28	16	2
rockstar	b	135	35	12:18:00	3	2	11	15	17	22	21	17	11	4	6	6
churro	f	135	118	16:43:00	0	0	0	1	6	12	18	17	29	31	10	11
filet mignon	f	134	114	18:44:00	1	1	0	1	0	2	10	9	20	65	23	2
salad wrap	f	134	90	13:35:00	1	0	0	3	1	11	58	15	8	30	6	1
babybel cheese	f	134	55	15:26:00	2	0	0	4	11	12	23	21	26	15	14	6
blizzard	f	134	110	18:18:00	1	1	0	0	0	5	14	21	23	39	25	5
aussie bite	f	133	38	13:25:00	0	1	1	2	22	29	16	24	14	9	10	5
lima bean	f	133	87	17:32:00	1	1	1	2	4	9	22	15	23	44	10	1
snapple	b	133	57	14:55:00	2	1	0	2	8	17	29	23	25	14	9	3
tabasco	f	133	52	13:28:00	4	2	1	1	10	20	39	12	6	25	4	9
cutie	f	133	58	14:12:00	1	2	0	4	13	18	30	28	19	10	7	1
beurre	f	132	24	11:45:00	0	2	0	12	27	31	15	9	9	15	8	4
spinach wrap	f	132	62	12:56:00	1	1	0	9	20	18	50	12	7	11	2	1
taro	f	131	72	15:43:00	1	0	0	11	7	12	26	13	22	26	10	3
l bar	f	130	24	12:02:00	0	0	4	10	24	22	19	9	16	25	1	0
saffron	f	130	64	15:00:00	1	0	1	4	14	20	16	15	15	30	10	4
smores	f	130	87	18:16:00	1	0	1	8	10	3	17	13	10	28	36	3
goldfish cracker	f	130	81	16:19:00	1	1	1	0	8	12	18	24	24	19	13	9
chai tea latte	b	130	72	12:26:00	1	0	2	10	27	23	17	21	18	8	3	0
plant milk	b	129	30	10:50:00	0	0	0	13	34	24	18	19	11	5	3	2
starburst	f	129	78	15:21:00	1	1	1	2	2	14	21	30	21	20	12	4
kaki	f	128	47	13:26:00	0	0	1	3	20	19	27	18	10	13	10	7
halloumi cheese	f	128	76	14:02:00	1	1	0	1	10	15	36	20	10	24	8	2
tartar sauce	f	128	95	16:50:00	0	0	0	1	2	9	34	13	26	30	9	4
portabella	f	127	91	16:50:00	1	0	1	0	1	10	38	11	25	29	11	0
gooseberry	f	127	55	13:07:00	0	0	0	10	22	21	16	12	19	17	7	3
trifle	f	127	83	18:02:00	1	0	0	1	4	2	21	10	25	36	20	7
ritz	f	127	70	16:00:00	2	1	0	3	9	12	20	19	19	16	19	7
pierogi	f	127	92	17:30:00	0	0	0	2	0	4	26	19	25	39	11	1
manhattan	b	127	80	18:48:00	0	1	0	1	0	1	1	4	30	56	25	8
pimento cheese	f	127	68	14:40:00	0	0	0	4	3	18	34	13	23	18	10	4
eggs benedict	f	126	114	11:00:00	0	0	0	4	35	44	36	4	0	2	1	0
isopure	b	126	15	11:44:00	0	0	4	2	36	25	14	9	15	11	3	7
donut hole	f	126	88	12:08:00	1	0	0	10	23	26	23	19	5	14	5	0
lemongrass	b	126	76	14:24:00	0	0	2	8	13	16	20	20	18	17	8	4
noix	f	126	25	13:02:00	1	0	0	1	34	13	19	14	27	7	7	3
oikos	f	125	41	12:17:00	1	0	1	7	17	28	35	19	6	7	3	1
truly	b	125	50	19:00:00	6	1	0	0	1	1	4	5	32	39	23	13
limeade	b	125	65	15:56:00	2	1	0	3	9	14	17	20	19	17	17	6
heineken	b	125	37	19:00:00	6	0	0	0	0	1	4	14	23	38	26	13
rocky road	f	124	89	16:04:00	1	0	0	2	3	10	22	24	18	24	16	4
blackcurrant	f	124	57	15:08:00	1	0	0	8	23	13	11	15	23	18	9	3
cheese toastie	f	124	76	13:20:00	0	0	1	1	7	23	39	20	15	6	10	2
whey protein isolate	f	124	20	12:17:00	0	0	1	11	28	21	22	10	9	10	11	1
beyond burger	f	124	84	17:49:00	0	0	1	0	2	6	19	9	32	44	9	2
puri	f	123	69	18:09:00	3	0	0	0	12	7	14	15	12	24	29	7
liquor	b	123	73	19:23:00	5	1	1	5	5	3	4	12	15	26	34	12
girl scout cookie	f	123	61	17:04:00	0	1	0	4	4	16	13	16	14	40	12	3
sprite zero	b	123	65	17:13:00	1	0	0	1	2	10	19	21	17	29	19	4
activia yogurt	f	123	33	11:55:00	1	0	3	14	23	24	14	16	13	9	6	0
elk	f	122	65	18:08:00	2	0	1	1	1	6	18	6	25	45	13	4
garlic toast	f	122	86	17:47:00	1	0	0	0	5	12	20	9	22	38	14	1
babybel	f	122	52	14:40:00	1	0	0	0	7	16	33	16	26	15	5	3
tuna salad sandwich	f	122	73	13:15:00	0	0	0	2	0	11	68	14	10	13	3	1
buffalo wing	f	122	94	18:17:00	1	1	0	2	1	8	16	13	14	40	20	6
fuji apple	f	122	54	13:38:00	0	0	0	4	6	21	39	24	7	15	6	0
rabbit	f	121	75	16:05:00	3	1	0	2	2	5	31	20	11	24	18	4
breakfast biscuit	f	121	46	10:25:00	2	1	3	12	39	27	9	12	4	3	8	1
tofurky	f	120	43	13:44:00	1	0	1	1	15	13	32	19	10	18	8	2
lemon curd	f	120	67	13:16:00	0	0	0	3	24	23	15	10	12	18	13	2
moussaka	f	120	78	17:05:00	1	0	1	1	6	5	25	16	18	32	12	3
sencha	b	120	33	10:07:00	0	0	3	43	13	15	12	15	10	6	2	1
afternoon tea	f	120	39	15:55:00	1	0	0	0	4	13	10	35	40	15	1	1
triscuit	f	120	69	16:12:00	0	0	0	1	2	7	27	19	28	23	7	6
lemon bar	f	119	68	15:12:00	0	1	0	2	6	18	12	32	20	14	9	5
gammon	f	119	83	18:08:00	0	0	0	0	1	4	27	8	15	49	15	0
salt and vinegar chip	f	119	74	16:00:00	1	0	0	0	3	8	30	17	25	17	13	5
lindor	f	118	60	16:44:00	0	0	0	2	4	6	12	27	19	21	22	5
lungo	b	118	17	13:38:00	0	1	0	2	11	15	34	30	17	7	1	0
jaggery	b	118	34	14:51:00	1	0	0	8	13	9	14	28	9	17	10	9
power crunch	f	118	34	13:06:00	1	0	0	7	9	29	24	17	16	12	3	0
fish chip	f	117	107	18:07:00	0	0	0	0	2	8	22	9	14	45	17	0
shakshouka	f	117	84	12:35:00	0	1	0	8	13	27	27	9	4	17	10	1
boba	b	117	89	16:30:00	1	1	0	1	1	3	15	30	37	16	10	2
ceylon	b	117	24	12:36:00	5	3	5	12	12	28	10	13	10	8	6	5
vanilla extract	f	117	44	11:15:00	0	0	3	16	19	28	12	17	10	10	1	1
nog	b	116	62	16:26:00	1	0	0	8	14	10	11	11	13	23	17	8
breakfast shake	b	116	15	08:20:00	0	0	9	41	31	26	5	1	0	2	1	0
chicken casserole	f	116	74	18:06:00	2	0	0	0	1	6	15	10	20	42	19	1
blt sandwich	f	116	99	13:51:00	0	0	1	1	4	12	45	17	8	21	7	0
pork pie	f	116	72	14:02:00	1	1	0	0	2	12	44	24	15	10	6	1
eclair	f	116	86	16:14:00	0	0	1	3	2	8	16	25	17	20	20	4
panettone	f	116	51	14:38:00	0	0	0	4	16	17	16	19	8	23	9	4
alfalfa sprout	f	115	46	13:26:00	1	1	1	14	9	20	20	18	11	14	4	2
quail	f	115	60	14:32:00	0	0	0	3	10	19	22	8	6	32	14	1
ripple	b	115	36	13:23:00	3	0	0	12	13	17	18	10	12	14	14	2
puff pastry	f	115	77	17:17:00	2	0	0	4	6	13	15	9	20	28	14	4
fiber one bar	f	115	38	13:13:00	0	0	2	3	16	20	24	18	10	17	4	1
strudel	f	115	80	16:00:00	0	0	0	5	11	10	18	13	16	26	13	3
egg cheese sandwich	f	115	66	09:23:00	0	0	4	23	40	20	16	4	4	2	2	0
bao	f	115	84	15:15:00	1	0	0	3	3	11	28	14	16	28	10	1
chicken skewer	f	115	83	17:53:00	0	0	0	1	1	6	18	13	19	37	19	1
aperol spritz	b	114	74	18:48:00	1	1	0	0	1	3	7	8	18	42	29	4
suja	b	114	37	12:46:00	0	0	0	11	22	13	22	18	16	10	2	0
lychee	f	114	70	15:40:00	0	0	2	6	9	5	23	15	20	16	11	7
cool whip	f	114	64	18:12:00	1	0	1	2	5	8	12	6	20	35	18	6
spare rib	f	114	84	17:42:00	0	0	0	0	3	6	20	9	23	32	18	3
turkey cheese sandwich	f	113	65	13:30:00	1	0	0	0	1	18	51	16	8	7	11	0
riz	f	113	30	14:00:00	1	0	0	1	6	8	41	14	7	19	15	1
atkins bar	f	113	36	14:59:00	2	0	2	1	12	16	9	28	21	11	7	4
rice krispie treat	f	113	82	15:07:00	2	1	0	5	6	10	22	26	15	9	15	2
nougat	f	113	77	16:38:00	2	0	0	0	5	9	9	24	24	19	14	7
alfredo sauce	f	112	76	18:10:00	0	0	0	2	3	2	17	10	15	52	10	1
lard	f	112	38	15:06:00	0	0	0	5	19	6	14	17	18	18	13	2
brittle	f	112	60	16:34:00	2	1	1	1	4	16	11	17	14	23	20	2
vimto	b	112	14	15:01:00	0	0	0	5	17	6	23	12	14	19	14	2
chocolate protein shake	b	112	44	12:38:00	0	0	0	4	14	22	26	10	16	12	6	2
manchego cheese	f	112	61	17:29:00	0	0	0	1	5	8	16	16	13	35	17	1
tikka masala	f	112	79	17:12:00	0	0	0	0	2	5	33	9	16	29	17	1
fettuccine alfredo	f	112	83	18:00:00	2	2	0	1	2	3	15	15	18	38	13	3
luna bar	f	112	49	12:26:00	1	0	1	20	14	16	12	20	12	13	2	1
christmas cake	f	112	46	15:51:00	0	0	1	6	11	7	13	20	23	15	10	6
powerade	b	111	62	14:55:00	2	0	1	1	5	17	26	11	21	20	6	1
laughing cow	f	111	50	14:57:00	0	0	0	4	11	13	19	20	18	14	9	3
hake	f	111	70	18:02:00	4	0	0	0	1	6	15	15	18	31	16	5
moscato	b	111	46	18:07:00	0	1	13	0	11	0	2	11	16	34	19	4
cheese steak	f	110	85	16:58:00	1	0	0	0	2	8	22	16	21	30	8	2
lactaid	b	110	32	11:47:00	1	0	2	14	25	16	11	7	9	10	14	1
sole	f	110	63	15:15:00	0	0	3	17	17	3	11	6	16	29	8	0
cognac	b	110	52	20:21:00	7	0	0	0	1	4	3	5	11	23	39	17
zoodles	f	110	80	17:54:00	2	0	0	1	2	9	19	8	20	39	9	1
tortilla soup	f	110	84	16:02:00	0	0	0	0	0	6	32	17	11	29	13	2
matzo	f	109	31	11:39:00	0	0	0	5	17	36	12	13	10	8	7	1
sabzi	f	109	41	15:12:00	1	0	0	0	2	10	33	14	4	21	19	5
korean barbecue	f	109	88	18:09:00	1	0	0	0	3	1	21	13	13	39	15	3
cashew cheese	f	109	49	14:55:00	0	0	1	1	6	11	22	18	11	29	9	1
ahi tuna	f	109	92	17:43:00	0	1	0	1	1	5	28	7	16	37	12	1
turkey salad	f	109	64	13:20:00	0	0	0	0	4	6	52	19	9	15	4	0
alfalfa	f	109	23	13:18:00	1	0	6	10	15	10	24	11	9	18	5	0
nopal	f	109	45	14:18:00	1	0	0	4	26	16	5	25	10	14	5	3
garlic butter	f	108	80	18:26:00	0	0	0	2	2	2	14	9	15	51	12	1
swede	f	108	71	17:38:00	0	0	0	0	1	5	19	11	30	35	7	0
muenster	f	108	48	15:10:00	0	0	0	7	4	17	16	14	17	15	13	5
bonbon	f	108	44	15:29:00	4	1	1	2	17	6	14	21	17	15	9	1
apricot jam	f	108	62	11:28:00	0	1	2	11	22	21	3	9	17	15	5	2
lo mein	f	107	83	18:15:00	2	2	0	1	1	5	13	7	24	40	11	1
nakd bar	f	107	38	14:12:00	0	0	0	1	15	13	20	27	15	8	8	0
apple fritter	f	106	76	11:10:00	1	0	1	10	23	24	17	9	4	8	8	1
microgreens	f	106	33	13:22:00	0	0	0	4	17	8	36	9	18	13	1	0
adobo	f	106	60	16:59:00	0	0	0	3	3	10	22	9	21	26	9	3
vada	f	106	57	13:22:00	0	0	0	4	28	11	14	4	6	27	12	0
whey isolate	f	106	15	13:46:00	0	0	1	10	10	12	22	15	9	16	9	2
snapper	f	106	86	18:30:00	1	0	1	0	3	1	15	9	14	51	9	2
palak paneer	f	106	77	18:26:00	0	1	1	1	1	8	17	9	9	38	14	7
poblano	f	106	75	17:04:00	0	0	0	2	7	7	22	8	15	31	12	2
chicken stock	f	106	65	17:40:00	1	0	0	2	4	8	20	6	16	38	6	5
rutabaga	f	106	49	16:46:00	0	0	0	7	3	7	18	12	28	23	8	0
macaron	f	105	67	15:27:00	3	0	1	0	5	11	18	23	16	17	7	4
chocolate sauce	f	105	69	18:14:00	1	0	0	0	7	11	13	10	10	37	13	3
halo top	f	105	44	19:36:00	0	0	0	0	1	1	3	7	15	35	35	8
toblerone	f	105	47	16:10:00	0	0	0	1	3	6	23	17	16	15	17	7
bulgogi	f	105	69	17:37:00	0	1	0	1	4	9	18	11	12	31	14	4
coors light	b	105	47	18:15:00	3	2	0	2	1	0	5	12	20	38	17	5
sucralose	b	104	14	12:24:00	2	0	8	17	11	14	10	8	13	11	6	4
tootsie	f	104	61	16:12:00	2	0	0	0	3	4	16	22	19	17	15	6
raita	f	104	69	18:20:00	0	0	0	0	0	4	20	15	11	23	28	3
apple strudel	f	104	62	17:02:00	1	0	0	3	11	11	9	9	18	28	13	1
mortadella	f	103	54	14:35:00	0	2	0	6	16	10	13	13	15	8	14	6
cannoli	f	103	80	17:05:00	0	1	0	0	2	7	12	18	20	27	12	4
christmas cookie	f	103	48	17:00:00	1	1	0	0	2	5	17	21	17	22	11	6
marzipan	f	102	58	16:47:00	0	0	0	1	7	8	10	17	16	13	21	9
basil pesto	f	102	66	14:50:00	1	1	0	0	1	7	34	15	12	24	6	1
pumpernickel	f	102	47	12:21:00	0	0	1	2	32	11	22	12	8	9	4	1
green bean casserole	f	102	63	17:20:00	1	1	0	0	3	5	26	12	14	35	4	1
tim tam	f	102	45	17:16:00	0	0	0	0	1	8	17	17	13	15	23	8
ginger biscuit	f	102	60	15:04:00	1	0	1	4	2	15	15	27	9	11	12	5
keto fat bomb	f	101	22	13:55:00	2	1	0	5	7	10	31	18	12	12	2	1
diet green tea	b	101	18	15:30:00	4	3	0	2	5	14	21	11	11	8	9	13
italian sub	f	101	80	13:56:00	2	0	0	1	0	13	38	14	8	14	10	1
fizz	b	101	41	14:20:00	3	0	0	6	12	13	16	14	10	8	11	8
date syrup	f	101	24	12:13:00	0	0	0	4	21	21	23	9	5	16	1	1
chevre	f	101	52	14:52:00	0	0	0	3	5	16	22	8	13	23	9	2
honeydew melon	f	101	63	14:25:00	0	1	0	5	15	10	18	15	8	23	5	1
khichdi	f	100	56	14:50:00	0	0	0	2	9	8	20	22	2	14	21	2
salsa verde	f	100	47	15:04:00	0	0	0	4	10	8	21	10	9	33	5	0
grape leaf	f	100	68	16:08:00	0	0	0	1	3	13	20	12	16	19	11	5
maize	f	100	36	15:14:00	0	0	0	2	3	10	27	16	16	17	8	1
stevia drop	b	100	14	10:06:00	0	0	11	13	24	11	9	12	7	8	5	0
leaf lettuce	f	100	32	17:50:00	0	0	0	0	1	3	22	11	16	33	9	5
swordfish	f	99	76	18:30:00	1	1	0	2	1	1	15	9	12	45	7	5
kefir smoothie	b	99	32	10:08:00	0	0	0	14	34	17	18	5	5	3	3	0
jalapeno popper	f	99	72	17:35:00	2	1	0	0	2	7	12	14	21	24	10	6
sunkist	b	99	17	16:30:00	0	1	0	0	2	9	19	17	20	16	12	3
gourd	f	99	55	14:00:00	0	0	1	2	8	9	29	21	4	11	14	0
frukost	f	98	13	08:55:00	0	0	0	32	52	13	0	0	0	1	0	0
werthers	f	98	30	15:59:00	1	3	1	3	9	9	13	15	14	20	5	5
grain free granola	f	98	41	11:46:00	0	0	0	12	24	16	11	9	7	14	3	2
spring greens	f	98	42	17:50:00	0	0	0	2	4	5	16	5	21	31	14	0
parmigiano	f	98	47	14:52:00	0	0	0	0	4	7	30	11	11	17	16	2
tapenade	f	97	59	16:02:00	0	0	0	1	8	9	19	11	15	20	11	3
fish fillet	f	97	68	18:10:00	1	1	0	0	3	10	9	8	16	29	10	10
horchata	b	97	71	15:45:00	1	0	0	0	9	11	18	14	13	18	12	1
bubble tea	f	96	72	16:44:00	0	0	0	0	1	3	9	27	16	19	18	3
pink lady apple	f	96	31	14:00:00	0	0	0	3	4	7	34	29	13	5	1	0
souffle	f	96	61	13:46:00	1	0	0	5	11	17	16	8	6	18	12	2
turkey taco	f	96	64	17:57:00	0	0	0	0	0	7	11	10	20	37	10	1
budweiser	b	95	26	20:38:00	3	0	0	0	1	1	4	5	9	20	36	16
fried chicken breast	f	95	66	17:15:00	0	0	0	1	5	2	16	11	21	27	9	3
cauliflower crust pizza	f	95	60	18:20:00	0	0	0	0	2	5	11	8	16	36	16	1
radler	b	95	47	18:31:00	0	0	0	3	0	2	11	15	11	23	15	15
wakame	f	95	48	14:01:00	0	0	0	0	8	12	27	10	16	13	6	3
street taco	f	95	71	16:49:00	0	0	0	1	2	11	13	12	23	20	12	1
tabouli	f	95	62	17:55:00	1	0	0	1	2	5	22	7	13	35	7	2
chicken cutlet	f	95	70	17:30:00	0	0	0	0	3	2	25	9	15	26	12	3
vino	b	94	34	18:52:00	5	0	0	0	4	0	12	11	11	19	17	15
cherry jam	f	94	39	11:24:00	0	0	9	11	11	22	12	7	8	9	3	2
vegan mayo	f	94	41	15:06:00	0	1	0	1	2	11	25	14	11	23	6	0
dandy blend	b	94	18	09:32:00	0	0	2	20	26	16	10	7	4	3	5	1
oxtail	f	94	51	16:57:00	0	0	0	0	4	10	17	12	16	22	9	4
keto pizza	f	93	55	17:30:00	1	0	0	1	3	6	9	10	26	19	10	8
home fries	f	93	73	10:51:00	0	0	0	4	28	33	15	6	0	6	1	0
pomme	f	93	25	13:33:00	0	0	1	0	16	8	24	10	14	12	7	1
beef sandwich	f	93	75	15:05:00	2	0	0	2	2	7	31	10	14	17	6	2
ribose	f	93	12	11:09:00	4	1	0	21	16	18	15	7	0	4	1	6
tamarind	f	93	64	17:24:00	0	0	0	1	6	8	10	13	15	24	12	4
shredded chicken	f	93	64	17:10:00	4	1	0	1	3	7	17	11	17	19	11	2
lemon tart	f	92	64	18:00:00	1	0	0	2	0	8	11	15	10	26	19	0
cacao butter	f	92	23	14:34:00	0	0	1	4	25	4	7	20	12	12	6	1
gruyere	f	92	57	13:36:00	0	0	0	4	7	13	27	9	8	17	7	0
bagel sandwich	f	92	53	10:49:00	0	1	0	4	26	28	18	10	1	3	1	0
champignons	f	92	50	15:39:00	0	0	0	0	2	2	30	14	9	21	13	1
malbec	b	92	44	19:47:00	1	1	0	0	2	0	5	3	11	30	34	5
rice pilaf	f	92	64	17:53:00	0	0	0	3	0	8	18	3	16	33	10	1
egg casserole	f	92	44	10:05:00	1	0	2	18	25	16	12	2	5	8	3	0
bergamot	b	92	13	14:00:00	0	0	0	6	5	19	16	7	12	19	6	2
jif	f	92	24	12:24:00	0	0	4	1	17	17	19	10	10	8	4	2
garlic naan	f	91	67	18:22:00	0	0	0	0	1	6	11	5	10	41	14	3
navel orange	f	91	33	14:52:00	0	0	0	2	4	12	22	18	15	9	7	2
romaine salad	f	91	54	15:00:00	0	0	0	1	0	8	31	7	15	22	7	0
antipasto	f	91	67	17:05:00	0	0	0	0	2	5	21	4	22	28	8	1
papad	f	91	48	15:21:00	1	0	0	0	0	5	16	31	6	16	14	2
strawberry shortcake	f	91	68	18:30:00	0	0	0	0	4	3	9	8	11	29	23	4
perogies	f	91	62	18:08:00	1	0	0	0	3	0	13	11	15	36	9	3
lunchtime	f	90	28	12:46:00	1	0	0	1	0	19	48	12	6	2	0	1
poutine	f	90	82	17:44:00	1	1	0	0	0	2	22	10	13	22	14	5
ajvar	f	90	38	14:30:00	1	0	0	7	11	10	12	10	9	22	7	1
polish sausage	f	90	56	15:04:00	1	0	0	0	7	17	16	10	12	22	4	1
dolma	f	90	57	14:51:00	0	0	0	1	7	10	21	14	12	19	3	3
icing	f	90	69	16:00:00	0	1	0	3	11	6	13	11	14	18	12	1
pork shoulder	f	89	43	16:49:00	0	0	0	0	6	3	23	7	18	27	5	0
cheesesteak	f	89	69	17:35:00	2	0	1	0	0	9	18	10	10	20	15	4
squirt	b	89	29	14:11:00	0	0	0	10	10	8	14	13	8	8	11	7
moose	f	89	50	18:01:00	1	1	0	0	4	5	17	6	12	29	13	1
lemon soda	b	89	33	20:02:00	1	0	0	1	0	3	4	15	13	8	27	17
mais	f	89	44	17:01:00	1	0	0	2	3	7	16	14	9	22	13	2
passata	f	89	36	14:37:00	0	0	0	0	1	8	29	11	12	22	5	1
chocolate ball	f	89	51	15:30:00	1	0	1	3	7	6	13	16	16	13	12	1
relleno	f	89	68	15:55:00	1	0	0	1	2	7	26	9	15	22	6	0
rabe	f	89	44	17:11:00	0	0	0	3	2	11	14	9	11	25	12	2
salmon patty	f	89	59	17:18:00	1	1	0	1	1	8	23	3	23	16	12	0
ragi	f	89	35	13:15:00	0	0	0	1	30	6	18	6	2	15	11	0
noosa	f	88	28	12:30:00	1	1	0	3	28	8	19	6	5	12	5	0
mango chutney	f	88	60	18:02:00	0	0	0	2	3	4	14	5	15	30	15	0
tagliatelle	f	88	71	17:59:00	1	0	0	0	2	2	17	6	18	21	20	1
hoagie	f	88	55	13:46:00	1	0	0	0	3	10	32	10	10	12	8	2
yogurt dressing	f	88	40	17:45:00	1	0	0	0	0	1	21	12	13	29	9	2
pesto sauce	f	88	47	15:01:00	0	0	0	0	1	21	17	10	9	18	10	2
shrimp cocktail	f	88	63	17:47:00	1	0	0	1	0	7	16	9	13	30	11	0
cortado	b	87	35	11:45:00	0	0	0	2	24	20	20	15	5	0	1	0
white sauce	f	87	58	16:50:00	0	0	2	0	1	5	25	6	14	24	4	6
pig	f	87	67	15:51:00	0	0	0	0	3	5	18	18	16	10	14	3
french dressing	f	87	42	15:53:00	0	0	0	2	1	7	23	11	17	21	5	0
yucca	f	87	46	14:14:00	1	0	0	10	5	5	22	7	14	18	4	1
erythritol	b	87	23	12:12:00	0	0	1	7	18	17	11	10	12	8	2	1
pork sandwich	f	87	75	14:30:00	0	1	0	2	2	8	27	12	8	17	10	0
tartare	f	87	78	18:37:00	0	0	0	0	2	1	17	12	5	31	18	1
snickerdoodle	f	87	49	17:07:00	1	0	0	0	0	4	10	19	17	19	11	6
shirataki	f	86	42	17:20:00	0	0	0	0	4	5	15	14	14	22	9	3
au gratin	f	86	55	17:33:00	0	1	0	0	2	5	16	12	14	27	9	0
souvlaki	f	86	68	18:01:00	2	0	0	0	0	4	17	9	10	29	13	2
kamut	f	86	26	13:39:00	0	0	1	1	15	11	19	2	16	13	6	2
halo top ice cream	f	86	39	19:32:00	2	0	0	0	2	1	4	8	14	24	25	6
lucky charm	f	85	43	13:56:00	0	1	5	2	14	13	9	9	6	11	9	6
tagine	f	85	59	18:47:00	0	0	0	0	0	1	13	5	12	37	15	2
baked chicken breast	f	85	49	16:58:00	0	0	0	0	5	10	18	6	12	28	6	0
rosehip tea	b	85	20	14:12:00	0	0	0	3	12	14	10	13	11	20	1	1
cactus	f	85	54	14:00:00	0	1	0	4	12	8	18	12	9	13	6	2
quest protein bar	f	85	31	14:29:00	1	3	0	4	5	20	11	13	13	4	6	5
halwa	f	85	49	16:29:00	1	0	0	2	5	6	16	10	10	16	15	4
thin mint	f	85	55	18:12:00	1	0	0	1	4	4	14	11	8	24	12	6
meusli	f	84	23	09:00:00	0	0	5	15	36	15	3	4	1	4	1	0
frites	f	84	56	16:34:00	3	0	0	0	0	4	25	11	10	16	12	3
frosted flake	f	84	53	16:18:00	3	2	0	6	8	15	7	6	6	21	6	4
banh mi	f	84	63	14:42:00	0	0	0	0	0	8	24	19	11	17	3	2
tazo	b	84	26	13:02:00	1	2	0	1	23	14	15	7	11	7	2	1
lavash	f	84	28	16:08:00	2	1	0	4	4	9	10	13	20	15	5	1
rajma	f	84	46	14:28:00	2	0	1	1	4	10	17	17	7	8	15	2
kava	b	83	20	14:32:00	1	0	0	12	9	11	8	10	6	6	14	6
monterey jack	f	83	42	13:39:00	1	0	0	11	6	17	10	9	8	11	8	2
hot pot	f	83	63	18:24:00	1	2	0	0	0	1	12	7	10	36	13	1
hot pocket	f	83	47	13:45:00	1	0	0	3	11	11	19	10	10	6	6	6
pozole	f	83	56	16:48:00	0	0	0	2	4	7	15	10	14	24	7	0
rice ball	f	83	54	16:41:00	2	1	0	0	2	8	18	9	12	21	9	1
chilaquiles	f	83	64	12:01:00	0	0	0	2	16	22	24	7	4	2	5	1
spanakopita	f	83	65	17:00:00	1	0	0	0	2	6	24	7	8	21	11	3
quince	f	82	40	14:26:00	0	0	1	0	7	13	15	14	11	12	7	2
chimichanga	f	82	65	18:04:00	0	0	0	1	0	4	14	7	13	31	11	1
basmati	f	82	49	17:41:00	1	0	0	0	0	6	18	7	16	25	8	1
twizzlers	f	82	52	17:56:00	1	0	0	0	0	7	14	8	13	19	13	7
liqueur	b	82	44	18:32:00	4	0	0	3	14	6	4	6	7	15	13	10
habanero	f	82	35	14:50:00	2	1	0	0	8	8	18	15	12	13	5	0
bibimbap	f	82	63	16:07:00	1	0	0	0	0	8	25	7	10	19	7	5
milky way	f	82	69	16:02:00	1	0	1	1	3	5	9	21	21	10	8	2
frankfurter	f	82	41	14:42:00	1	0	0	7	15	2	14	8	16	12	7	0
chicken kiev	f	82	66	18:24:00	0	0	0	0	0	2	6	5	15	42	10	2
dandelion root tea	b	82	20	12:20:00	2	2	2	14	10	11	9	7	7	8	5	5
pancetta	f	82	56	15:44:00	0	0	0	3	3	9	17	10	5	30	5	0
poppadom	f	82	69	19:10:00	0	0	0	2	1	1	4	2	13	31	22	6
cress	f	81	54	13:26:00	0	0	0	10	3	13	23	14	1	13	4	0
cream puff	f	81	49	17:49:00	0	0	0	3	3	6	6	13	12	25	8	5
lady grey	b	81	15	12:29:00	0	0	0	1	18	17	13	8	7	10	6	1
barbacoa	f	81	61	14:22:00	1	0	0	1	3	7	26	15	9	15	4	0
swiss sandwich	f	81	43	13:23:00	0	0	0	2	3	8	36	14	2	12	1	3
chleba	f	80	18	14:39:00	0	0	0	6	17	6	7	8	13	16	7	0
mentos	f	80	38	16:34:00	0	2	0	4	9	4	8	11	22	11	7	2
frito	f	80	54	17:12:00	0	0	0	1	1	10	12	7	19	16	12	2
pecorino	f	80	43	14:54:00	0	0	0	0	9	7	15	12	4	19	11	3
siggis	f	80	23	12:32:00	0	0	0	11	14	11	16	3	4	11	7	3
cannelloni	f	80	57	17:46:00	0	0	0	0	1	3	13	10	18	24	9	2
egg drop soup	f	80	54	17:56:00	1	0	1	1	2	3	14	11	9	30	7	1
teriyaki sauce	f	80	59	17:13:00	2	1	0	1	1	6	17	11	14	22	4	1
chicken korma	f	80	55	18:02:00	0	0	0	0	0	1	19	6	12	28	14	0
plum jam	f	80	49	13:56:00	0	1	0	7	20	6	8	10	12	9	5	2
rib eye steak	f	80	57	18:12:00	0	0	0	0	2	6	7	4	18	29	13	1
bang energy drink	b	80	21	13:44:00	1	0	1	4	11	15	11	12	11	6	5	3
sunbutter	f	80	30	12:48:00	1	0	0	6	16	10	14	8	9	11	5	0
pilaf	f	80	50	17:14:00	0	0	0	0	3	6	13	9	18	25	5	1
crudite	f	80	42	15:00:00	0	1	0	3	1	2	27	9	16	14	7	0
tahini dressing	f	79	50	15:16:00	0	0	1	1	1	4	23	15	11	20	3	0
chocolate syrup	f	79	48	18:14:00	0	0	0	0	2	5	10	6	14	26	11	5
lemongrass tea	b	79	35	15:13:00	2	0	2	1	0	19	10	8	10	14	10	3
pulao	f	79	40	14:30:00	0	0	0	1	5	3	22	16	9	10	8	5
amaretto	b	79	41	17:12:00	1	0	0	2	17	8	6	2	7	12	18	6
shiraz	b	79	28	19:11:00	0	0	1	1	2	0	2	3	11	28	27	4
whole wheat english muffin	f	79	26	10:12:00	2	1	1	14	20	20	7	6	1	3	2	2
chicken bowl	f	79	65	13:49:00	0	0	0	2	1	7	31	12	8	11	6	1
dried blueberry	f	79	28	11:04:00	1	0	1	17	15	12	6	6	11	7	2	1
laksa	f	79	59	16:53:00	1	0	0	0	1	4	23	9	11	20	8	2
daves killer bread	f	79	27	11:08:00	0	0	4	2	21	18	16	5	8	2	2	1
cornetto	f	78	48	18:21:00	2	0	1	3	7	6	4	8	3	27	12	5
zinger	f	78	40	14:46:00	5	0	1	6	6	10	11	13	9	7	7	3
shandy	b	78	43	18:54:00	2	0	0	0	0	1	11	5	12	22	17	8
lemon pie	f	78	50	16:03:00	2	0	0	1	4	8	15	8	10	10	13	7
chole	f	78	48	14:34:00	2	2	0	0	8	6	15	13	5	11	12	4
insalata	f	77	16	17:05:00	2	0	0	0	0	1	20	16	3	14	18	3
kofta	f	77	55	18:33:00	0	1	0	0	1	5	11	8	8	26	14	3
sorghum	f	77	30	14:00:00	0	0	0	6	7	8	16	11	8	11	10	0
pork skin	f	77	44	13:47:00	0	0	0	0	4	14	22	15	10	12	0	0
madeleine	f	76	41	14:12:00	1	0	2	4	8	8	15	10	17	6	5	0
lollipop	f	76	60	16:04:00	0	0	0	0	1	6	13	17	7	12	15	5
cornmeal	f	76	37	11:59:00	0	0	0	1	27	10	8	4	4	19	3	0
hershey bar	f	76	53	16:15:00	2	0	0	0	4	2	11	19	13	11	11	3
pilau	f	75	48	18:42:00	0	0	0	2	0	1	7	3	11	23	25	3
cacao tea	b	75	4	10:12:00	0	0	0	12	25	23	12	1	1	1	0	0
porter	b	75	42	18:58:00	2	1	0	0	1	2	4	5	15	21	18	6
kabocha	f	75	27	15:22:00	0	0	0	2	10	3	17	11	10	16	4	2
epic bar	f	75	30	14:00:00	0	0	0	0	7	12	17	16	7	11	5	0
sriracha sauce	f	75	40	13:35:00	0	0	0	3	4	9	23	4	7	19	4	2
fruit vegetable smoothie	b	75	23	11:30:00	1	0	1	9	14	16	14	10	5	5	0	0
halva	f	75	47	15:43:00	1	0	0	3	10	6	12	10	9	12	11	1
elderflower cordial	b	75	34	17:40:00	0	0	0	0	1	5	8	13	13	24	11	0
cinnamon toast crunch	f	75	41	15:26:00	2	0	0	3	10	11	10	5	6	11	10	7
sherry	b	75	49	18:34:00	1	0	0	0	0	2	13	1	13	31	10	4
piccolo	b	75	19	10:48:00	1	0	4	13	13	15	13	11	3	1	1	0
huevos rancheros	f	74	63	11:40:00	0	1	0	1	13	25	19	3	5	5	2	0
yo	f	74	48	12:08:00	0	0	0	12	15	9	16	9	5	2	3	3
yogi tea	b	74	23	13:12:00	2	1	0	4	15	12	8	13	9	1	6	3
jolly rancher	f	74	28	14:49:00	2	0	1	4	4	8	14	16	10	6	4	5
teff	f	74	24	13:27:00	2	0	0	5	14	9	14	8	11	7	4	0
true lemon	b	74	6	14:13:00	1	2	2	1	12	13	7	7	6	9	8	6
beef casserole	f	74	48	18:06:00	0	0	0	0	1	5	10	5	14	23	14	2
jarlsberg	f	74	26	15:10:00	0	0	0	6	8	8	11	11	11	8	7	4
pina colada	b	74	55	18:17:00	0	0	0	0	3	4	5	6	13	26	11	6
vinaigrette dressing	f	74	35	14:42:00	2	1	0	1	0	9	22	8	14	10	3	4
vegan spread	f	74	28	11:32:00	2	0	0	9	13	18	5	9	7	4	4	3
torte	f	73	54	17:31:00	0	0	0	2	1	4	18	9	5	15	18	1
lifesaver	f	73	36	14:52:00	0	0	0	1	2	9	17	24	10	5	5	0
hoisin	f	73	57	17:07:00	1	0	0	0	2	5	19	6	13	18	6	3
pink grapefruit	f	73	34	14:34:00	0	1	5	7	7	6	9	7	11	10	7	3
taffy	f	73	47	15:30:00	2	0	0	0	4	5	16	14	9	12	5	6
aperol	b	73	41	19:00:00	0	0	0	2	0	2	4	3	11	31	13	7
pedialyte	b	72	21	14:06:00	0	0	1	0	18	10	7	17	8	7	3	1
kashi cereal	f	72	26	10:40:00	0	0	0	9	22	11	7	6	5	8	2	2
ferrero rocher	f	72	46	18:26:00	1	1	0	0	3	4	11	6	6	15	19	6
apple turnover	f	72	50	16:58:00	2	0	0	0	6	5	10	9	10	16	11	3
cannellini bean	f	72	35	14:32:00	0	0	0	2	8	6	19	9	7	15	5	1
bilberry	f	71	12	08:42:00	1	0	9	16	21	4	2	0	7	4	3	4
stollen	f	71	29	15:48:00	1	0	0	2	5	9	12	8	10	12	11	1
izze	b	71	27	15:15:00	1	0	0	0	3	5	18	12	9	18	3	2
pavlova	f	71	58	17:58:00	1	0	0	0	4	3	7	9	13	19	15	0
silverbeet	f	71	32	14:49:00	0	0	0	5	15	1	13	6	6	24	1	0
duck breast	f	71	55	18:01:00	1	0	0	0	0	1	18	9	7	25	8	2
salada	f	71	26	14:45:00	0	0	0	0	2	14	17	8	11	5	13	1
eggo	f	71	34	09:30:00	0	0	0	17	27	7	3	5	3	7	1	1
breakfast casserole	f	71	33	09:55:00	0	0	2	12	22	9	7	6	6	6	1	0
vegetable scramble	f	71	42	12:04:00	0	0	1	6	15	12	16	1	8	11	1	0
breadcrumb	f	71	53	18:11:00	1	0	0	2	1	2	10	7	10	28	9	1
built bar	f	71	10	11:32:00	0	0	0	2	12	28	10	10	4	4	1	0
double double	f	70	37	13:14:00	0	1	0	3	7	12	16	6	10	8	3	4
spinach artichoke dip	f	70	53	16:00:00	0	0	0	0	2	7	18	7	16	12	6	2
philly cheesesteak	f	70	61	16:16:00	1	0	0	0	0	5	18	11	9	18	6	2
napa cabbage	f	70	34	17:28:00	0	0	0	1	2	2	15	10	9	21	8	2
chicken apple sausage	f	70	30	11:32:00	0	0	0	8	6	23	11	2	9	10	1	0
boursin	f	70	41	15:56:00	2	0	0	2	5	6	13	9	10	18	4	1
harissa	f	70	43	16:48:00	2	0	0	1	4	5	18	5	7	23	5	0
kvarg	f	69	20	14:50:00	1	0	0	9	7	6	6	15	9	7	8	1
maki	f	69	52	18:09:00	1	2	0	0	3	1	11	3	12	24	12	0
wiener	f	69	52	14:24:00	1	0	0	0	6	9	18	10	9	9	7	0
piccata	f	69	53	18:35:00	0	0	1	0	2	3	6	3	11	32	9	2
ribena	b	69	28	18:02:00	1	1	0	1	0	2	14	6	10	22	8	4
baked ziti	f	69	49	17:58:00	0	1	0	2	0	4	9	4	16	27	5	1
junk food	f	69	34	17:17:00	1	0	0	2	5	3	8	9	12	6	14	9
ovaltine	b	68	26	14:47:00	1	2	0	1	12	11	6	8	5	15	5	2
tandoori chicken	f	68	50	18:00:00	1	0	0	0	1	1	18	6	7	25	8	1
panna cotta	f	68	57	19:00:00	0	0	0	0	1	4	11	6	4	16	23	3
herbal infusion	b	68	17	14:56:00	0	0	0	5	3	16	6	11	6	12	9	0
chaffle	f	67	23	12:59:00	0	0	0	4	6	12	15	11	7	11	1	0
corn flour	f	67	22	13:07:00	0	0	0	1	8	13	14	6	11	7	6	1
corned beef hash	f	67	57	10:57:00	0	0	0	5	18	19	11	3	2	5	3	1
smarties	f	67	45	16:16:00	0	0	0	2	2	4	12	10	15	7	11	4
lime soda	b	67	37	17:55:00	1	0	0	2	0	3	11	11	7	18	12	2
tuna casserole	f	67	37	18:12:00	1	0	0	2	1	3	11	3	11	27	7	1
pilsner	b	67	30	18:30:00	0	1	0	1	1	0	5	6	12	28	10	3
stuffed bell pepper	f	66	43	16:43:00	0	0	0	0	2	4	10	14	10	22	3	1
mule	b	66	39	19:01:00	1	0	0	0	0	2	4	2	11	27	10	9
blackberry jam	f	66	35	11:06:00	0	0	0	5	20	11	13	1	5	7	3	1
carpaccio	f	66	58	18:00:00	0	0	0	0	1	3	12	8	9	18	15	0
mixed nut butter	f	66	18	15:18:00	0	0	1	1	5	12	9	11	11	12	4	0
zinfandel	b	66	27	19:26:00	1	0	0	0	0	0	0	4	13	27	14	7
cheezit	f	66	41	15:27:00	1	0	1	0	5	5	13	15	11	6	5	4
rib eye	f	66	38	17:49:00	0	0	0	0	2	2	12	7	11	22	8	2
pumpernickel bread	f	66	32	13:54:00	1	1	0	1	8	10	16	5	5	9	10	0
tito	b	65	18	20:01:00	5	0	0	0	3	0	2	0	13	13	19	10
haggis	f	65	35	17:47:00	1	0	1	7	2	6	6	4	8	23	6	1
cordon bleu	f	65	49	17:44:00	0	0	0	1	2	4	11	8	9	22	8	0
kung pao chicken	f	65	52	16:49:00	1	0	1	0	0	3	17	9	9	20	5	0
milano	f	65	35	17:50:00	0	0	0	2	3	3	10	5	12	19	6	5
amazing grass	f	65	19	09:38:00	0	0	0	14	23	13	6	3	1	3	1	1
angel hair	f	65	44	17:50:00	0	0	0	1	1	1	11	9	12	21	6	3
kwark	f	65	8	15:30:00	0	0	0	2	18	3	4	11	17	7	2	1
monster energy drink	b	65	19	09:44:00	0	0	0	7	28	14	6	4	2	2	1	1
oeuf	f	64	25	12:36:00	0	0	0	6	12	6	25	2	3	4	6	0
ziti	f	64	39	18:02:00	0	0	0	0	2	4	12	4	9	21	11	1
ginger cake	f	64	40	16:02:00	0	0	0	0	1	5	10	15	15	9	8	1
pastrami sandwich	f	64	49	15:15:00	1	0	0	0	1	7	18	7	9	13	6	2
butterscotch	f	64	42	17:31:00	0	1	1	0	2	2	7	10	14	13	12	2
cocktail sauce	f	64	45	17:38:00	1	0	0	0	0	7	14	5	7	26	4	0
rosehip	f	64	21	10:19:00	0	0	1	13	13	14	4	5	5	4	2	3
tallow	f	63	15	14:51:00	0	0	0	2	8	9	7	9	6	15	7	0
peroni	b	63	22	19:21:00	2	0	0	0	1	0	0	6	8	23	19	4
yolk	f	63	31	12:15:00	0	0	0	5	11	15	11	5	8	7	0	1
smore	f	63	40	19:23:00	0	0	0	1	3	0	7	6	3	22	20	1
tangelo	f	63	38	14:41:00	0	0	2	1	4	10	11	10	6	9	6	4
challah	f	63	31	15:15:00	1	0	0	1	3	11	13	5	8	11	6	4
bearnaise	f	63	34	18:03:00	0	0	0	0	0	4	17	2	8	20	11	1
yogurt sauce	f	63	45	17:22:00	0	0	0	0	0	7	12	5	13	18	8	0
bamboo shoot	f	62	41	16:48:00	0	0	0	0	3	10	9	7	6	18	9	0
boar	f	62	44	14:30:00	0	0	0	2	5	2	12	16	9	12	2	2
galette	f	62	34	16:46:00	0	0	0	0	0	6	11	11	9	17	6	2
chawal	f	62	17	15:23:00	0	0	0	0	3	3	5	24	5	3	17	2
kumquat	f	62	30	14:42:00	0	0	0	3	8	7	6	11	12	12	3	0
cuties	f	62	31	13:43:00	0	1	0	2	6	8	17	8	6	6	7	1
butterfinger	f	62	51	17:16:00	3	0	0	0	1	3	9	10	14	13	6	3
negroni	b	62	43	19:02:00	1	0	0	0	2	0	1	1	15	19	19	4
maca root	f	62	10	09:18:00	0	0	4	11	22	8	4	1	4	7	1	0
cinnamon bread	f	62	38	15:34:00	2	1	1	5	11	3	8	5	3	16	3	4
piadina	f	62	34	17:22:00	0	0	0	4	5	1	15	4	3	6	22	2
jersey mike	f	61	49	13:48:00	0	0	0	1	0	3	28	6	3	11	7	2
sambal	f	61	25	13:41:00	0	0	0	1	10	7	16	6	3	16	2	0
pirate booty	f	61	35	15:28:00	1	0	0	0	2	8	8	15	14	7	5	1
fruitcake	f	61	26	16:38:00	0	1	0	2	3	3	14	8	5	15	8	2
pea pod	f	61	29	16:46:00	1	0	0	2	3	5	14	6	8	19	3	0
carnitas taco	f	61	46	17:36:00	1	0	0	0	2	3	7	9	14	19	4	2
crush	b	61	36	17:00:00	0	0	0	1	1	3	9	9	14	20	4	0
roquefort	f	61	26	15:22:00	0	0	0	2	3	3	15	9	7	10	8	4
kipper	f	61	42	12:46:00	0	0	0	5	7	9	17	4	7	7	4	1
garlic hummus	f	61	23	15:32:00	0	1	0	0	3	3	18	7	11	13	2	3
tomatillo	f	60	41	16:36:00	0	0	0	0	5	9	6	8	17	10	4	1
klondike bar	f	60	38	19:34:00	0	2	0	2	0	3	3	4	5	17	21	3
haricot verts	f	60	24	13:34:00	0	0	0	1	6	7	18	3	8	10	7	0
olive oil dressing	f	60	32	16:41:00	0	1	0	0	0	5	17	7	9	19	1	1
stromboli	f	59	46	18:31:00	0	0	1	0	0	5	6	2	9	29	7	0
camembert cheese	f	59	31	15:34:00	1	0	1	0	10	4	7	10	8	13	5	0
poori	f	59	41	13:50:00	1	0	0	1	15	5	9	3	3	9	10	3
bitter gourd	f	59	41	14:59:00	0	0	0	0	0	1	19	10	5	12	9	3
maggi	f	59	34	17:30:00	3	0	0	0	4	7	5	7	10	12	7	4
puer	b	59	6	10:37:00	0	0	0	6	19	7	4	5	1	9	4	4
lamb shank	f	59	47	18:30:00	1	0	0	1	0	2	6	5	10	22	9	3
cinnamon bagel	f	59	27	10:58:00	0	1	1	3	18	24	4	1	4	1	2	0
onion dip	f	59	37	18:01:00	0	0	0	0	1	5	7	9	7	13	15	2
crunchie	f	59	32	16:29:00	0	0	0	1	2	6	6	9	15	8	5	7
maltesers	f	59	45	17:39:00	0	0	0	0	4	5	2	11	9	12	14	2
olive salad	f	59	32	13:30:00	1	0	0	0	1	15	15	6	6	7	8	0
orange pekoe tea	b	59	8	13:00:00	0	0	0	10	8	7	6	5	5	6	7	5
sunflower seed butter	f	59	23	10:35:00	0	0	0	6	21	9	3	7	8	2	2	1
chana masala	f	59	48	14:30:00	0	1	0	0	2	6	21	2	4	11	11	1
turkish delight	f	59	42	15:18:00	0	0	0	0	3	6	12	10	6	10	7	5
meal shake	b	58	19	13:44:00	1	0	7	5	6	7	5	10	12	5	0	0
honey crisp apple	f	58	36	14:29:00	0	1	1	0	6	4	16	13	6	3	2	6
mcchicken	f	58	44	15:04:00	4	3	2	0	0	4	15	11	5	4	5	5
mint chocolate chip ice cream	f	58	40	19:21:00	2	0	0	1	0	0	5	6	9	16	18	1
cafe con leche	b	58	18	11:24:00	0	0	0	3	17	12	9	6	8	3	0	0
[truncated: 759 more rows]
