# Supplementary material for: The diversity and consistency of what and when people eat
Source: Research Square preprint supplement (doi:10.21203/rs.3.rs-6149642/v1), 2025-08-05
Supplement: Supplementary file 3 [file 6768beed4d1fbb1c928717ce.xlsx]

## Sheet: 18144_0_data_set_4693310_sskk9c
Table S13: Effects of Age, Sex, Work Hours on Top Ranked Food and Beverages
rank	Young	Old	Male	Female	Shift Workers	Regular Workers	Early Eaters	Late Eaters
1	coffee	coffee	coffee	coffee	coffee	coffee	coffee	coffee
2	egg	salad	egg	salad	chicken	salad	egg	cheese
3	chicken	cheese	chicken	cheese	cheese	chicken	salad	salad
4	salad	chicken	salad	egg	egg	egg	chicken	chicken
5	cheese	egg	cheese	chicken	salad	cheese	cheese	egg
6	banana	banana	rice	banana	rice	rice	banana	rice
7	rice	rice	banana	rice	banana	banana	apple	banana
8	apple	apple	pizza	apple	apple	apple	rice	bread
9	bread	bread	bread	chocolate	potato	bread	avocado	chocolate
10	chocolate	tomato	apple	bread	chocolate	chocolate	potato	pizza
11	pizza	tea	potato	tomato	bread	pizza	bread	apple
12	potato	potato	beer	tea	pizza	potato	tomato	tea
13	tomato	yogurt	tea	potato	tea	tea	broccoli	potato
14	avocado	avocado	chocolate	avocado	avocado	tomato	carrot	tomato
15	carrot	broccoli	broccoli	pizza	chip	avocado	tea	yogurt
16	pasta	chocolate	tomato	carrot	tomato	broccoli	chocolate	chip
17	tea	butter	yogurt	broccoli	broccoli	yogurt	yogurt	milk
18	broccoli	carrot	avocado	yogurt	carrot	carrot	pizza	avocado
19	yogurt	salmon	pasta	chip	yogurt	chip	bacon	pasta
20	chip	toast	bacon	butter	bacon	pasta	blueberry	carrot
21	milk	bacon	carrot	milk	milk	bacon	almond	broccoli
22	spinach	pizza	milk	pasta	pasta	milk	salmon	cake
23	ice cream	blueberry	chip	toast	peanut butter	butter	milk	ice cream
24	cake	almond	sausage	almond	sandwich	salmon	butter	beer
25	beer	milk	sandwich	spinach	sausage	toast	peanut butter	butter
26	cookie	chip	soup	bacon	butter	soup	spinach	soup
27	peanut butter	soup	salmon	salmon	toast	cake	chip	cookie
28	soup	spinach	steak	blueberry	cookie	ice cream	soup	bacon
29	salmon	cracker	beef	soup	spinach	beer	toast	sandwich
30	butter	mushroom	ice cream	cake	beef	sausage	mushroom	toast
31	bacon	ice cream	cake	ice cream	cake	almond	pasta	sausage
32	sandwich	sausage	bean	cookie	ice cream	spinach	sausage	salmon
33	mushroom	bean	toast	peanut butter	mushroom	sandwich	bean	spinach
34	almond	peanut butter	spinach	mushroom	almond	cookie	onion	almond
35	sausage	pasta	almond	sausage	salmon	peanut butter	beef	bean
36	blueberry	sandwich	butter	cracker	blueberry	blueberry	oatmeal	mushroom
37	toast	onion	cookie	strawberry	steak	bean	cucumber	peanut butter
38	cucumber	cake	peanut butter	sandwich	beer	mushroom	sandwich	beef
39	beef	cookie	mushroom	bean	soup	steak	ice cream	steak
40	bean	steak	fish	onion	onion	beef	cookie	fish
41	onion	cream	blueberry	cucumber	strawberry	strawberry	cake	cracker
42	strawberry	beef	ham	hummus	bean	cracker	sweet potato	blueberry
43	steak	orange	burger	beef	ham	onion	strawberry	onion
44	hummus	strawberry	onion	orange	orange	ham	cauliflower	ham
45	sweet potato	beer	pork	steak	cracker	orange	steak	strawberry
46	orange	oatmeal	orange	cream	burger	fish	orange	orange
47	burger	ham	strawberry	sweet potato	cucumber	hummus	ham	wine
48	pancake	cauliflower	sweet potato	cauliflower	fish	cauliflower	cracker	cucumber
49	fish	red wine	peanut	ham	cream	cucumber	cream	cream
50	ham	sweet potato	wine	fish	hummus	sweet potato	green tea	burger
51	pork	fish	hummus	popcorn	pork	burger	hummus	hummus
52	green tea	wine	cauliflower	beer	sweet potato	cream	walnut	pork
53	honey	hummus	pancake	wine	cauliflower	wine	fish	popcorn
54	cauliflower	walnut	green tea	green tea	oatmeal	popcorn	burger	red wine
55	cracker	popcorn	cracker	red wine	turkey	pork	corn	green tea
56	wine	grape	cucumber	grape	popcorn	red wine	kale	grape
57	noodle	green bean	oatmeal	oatmeal	biscuit	green tea	pancake	honey
58	oatmeal	turkey	tuna	pancake	pancake	pancake	turkey	pancake
59	grape	shrimp	turkey	honey	taco	grape	chili	cauliflower
60	tuna	cucumber	grape	corn	green tea	oatmeal	dark chocolate	sweet potato
61	curry	green tea	corn	burger	peanut	turkey	grape	corn
62	popcorn	corn	curry	roll	honey	corn	green	peanut
63	corn	pea	red wine	green bean	fry	peanut	green bean	noodle
64	smoothie	green	black coffee	pea	pepper	pea	cabbage	tuna
65	oat	peanut	cream	green	wine	tuna	popcorn	biscuit
66	kale	roll	taco	turkey	grape	curry	oat	shrimp
67	dark chocolate	chili	honey	dark chocolate	corn	green bean	honey	oatmeal
68	cream	lettuce	omelette	tuna	roll	roll	pea	cereal
69	juice	pork	cereal	pork	tuna	honey	peanut	pea
70	zucchini	kale	shrimp	lettuce	kale	taco	zucchini	curry
71	pepper	raspberry	spaghetti	pepper	black coffee	shrimp	pork	turkey
72	cereal	tuna	noodle	olive	cereal	chili	beer	roll
73	peanut	olive	pea	curry	green bean	biscuit	pepper	pepper
74	turkey	omelette	popcorn	raspberry	chili	pepper	smoothie	taco
75	cabbage	biscuit	chili	chili	salsa	noodle	lettuce	juice
76	almond milk	burger	biscuit	kale	noodle	spaghetti	salsa	fry
77	lettuce	dark chocolate	pepper	walnut	curry	smoothie	tuna	olive
78	pea	honey	fry	biscuit	shrimp	green	cashew	green bean
79	taco	asparagus	kale	shrimp	dark chocolate	kale	roll	green
80	sushi	pepper	green bean	smoothie	almond milk	dark chocolate	spaghetti	omelette
81	mango	salsa	juice	herbal tea	lettuce	black coffee	black coffee	lettuce
82	biscuit	black coffee	roll	peanut	muffin	olive	muffin	smoothie
83	tofu	cabbage	hamburger	lemon	pea	walnut	raspberry	spaghetti
84	garlic	cereal	cabbage	noodle	cabbage	salsa	olive	chili
85	green	lemon	smoothie	zucchini	smoothie	cereal	pear	cabbage
86	roll	hamburger	walnut	cabbage	cashew	lettuce	almond milk	dark chocolate
87	quinoa	spaghetti	green	salsa	red wine	cabbage	olive oil	bagel
88	red wine	pancake	protein shake	almond milk	green	bagel	shrimp	kale
89	green bean	muffin	olive	oat	juice	fry	cereal	salsa
90	chili	scrambled egg	lettuce	taco	lemon	zucchini	curry	lemon
91	lentil	smoothie	oat	mango	spaghetti	omelette	quinoa	black coffee
92	olive oil	bagel	asparagus	coconut	omelette	raspberry	tofu	walnut
93	spaghetti	celery	salsa	spaghetti	zucchini	oat	taco	zucchini
94	olive	curry	dark chocolate	cereal	oat	muffin	omelette	sushi
95	salsa	cashew	lentil	sauce	walnut	asparagus	asparagus	oat
96	walnut	olive oil	sushi	bagel	olive	almond milk	sauce	garlic
97	pear	almond milk	cashew	mayonnaise	raspberry	lentil	noodle	mango
98	shrimp	pear	olive oil	granola	garlic	herbal tea	lemon	almond milk
99	raspberry	zucchini	bagel	tofu	asparagus	lemon	mango	sauce
100	black coffee	noodle	meatball	black coffee	mango	pear	celery	muffin
101	fries	herbal tea	garlic	muffin	donut	sauce	cherry	candy
102	fry	brussel sprout	zucchini	pear	mayonnaise	scrambled egg	biscuit	mayonnaise
103	sauce	cherry	muffin	omelette	mashed potato	juice	coconut	herbal tea
104	bagel	granola	orange juice	fry	sauce	mango	garlic	orange juice
105	wrap	garlic	scrambled egg	olive oil	wrap	mayonnaise	lentil	croissant
106	coconut	mashed potato	burrito	garlic	bagel	cashew	hamburger	hamburger
107	omelette	taco	pear	quinoa	granola	tofu	brussel sprout	raspberry
108	lemon	white wine	fries	asparagus	pineapple	olive oil	fry	coconut
109	granola	mayonnaise	quinoa	cashew	scrambled egg	granola	mayonnaise	olive oil
110	cashew	sauce	mango	scrambled egg	guacamole	garlic	herbal tea	lentil
111	pineapple	peach	wrap	lentil	meatball	sushi	bagel	pineapple
112	mayonnaise	oat	mashed potato	juice	celery	quinoa	cinnamon	pear
113	croissant	coconut	french fries	pineapple	sushi	wrap	brown rice	sugar
114	protein shake	fry	chicken breast	cream cheese	pear	hamburger	granola	granola
115	muffin	pineapple	lamb	peach	coconut	coconut	pineapple	scrambled egg
116	herbal tea	mango	granola	celery	sugar	meatball	cottage cheese	asparagus
117	kombucha	raisin	pie	guacamole	tofu	pineapple	black bean	cashew
118	asparagus	potato chip	tofu	sushi	candy	cream cheese	scrambled egg	cream cheese
119	chickpea	tofu	almond milk	cherry	olive oil	guacamole	ginger	pie
120	guacamole	vegetable soup	hot dog	white wine	peach	mashed potato	tortilla	mashed potato
121	orange juice	quinoa	cheeseburger	wrap	quinoa	brussel sprout	wine	quinoa
122	brownie	lentil	guacamole	croissant	cheeseburger	celery	peach	fries
123	cinnamon	cream cheese	croissant	ginger	chicken breast	candy	red wine	guacamole
124	pie	guacamole	pineapple	cinnamon	lentil	croissant	pickle	donut
125	donut	pie	raspberry	latte	pickle	pie	beet	tofu
126	cream cheese	juice	sauce	sugar	hamburger	peach	chicken breast	white wine
127	tortilla	cottage cheese	lemon	mashed potato	hot dog	tortilla	guacamole	peach
128	candy	ginger	brussel sprout	candy	kombucha	fries	cream cheese	wrap
129	scrambled egg	brown rice	protein bar	pie	pie	orange juice	greek yogurt	watermelon
130	protein bar	pecan	mayonnaise	watermelon	croissant	chicken salad	meatball	french fries
131	watermelon	chicken breast	lasagna	brownie	cinnamon	greek yogurt	protein shake	meatball
132	celery	chicken salad	coconut	hamburger	cream cheese	brownie	vegetable soup	cherry
133	greek yogurt	orange juice	watermelon	brussel sprout	fries	sugar	juice	brownie
134	meatball	watermelon	donut	kombucha	tortilla	watermelon	watermelon	jam
135	mashed potato	black bean	tortilla	jam	orange juice	white wine	jam	celery
136	ginger	sugar	candy	tortilla	protein shake	cherry	chickpea	ginger
137	jam	beet	pickle	chickpea	cherry	donut	kombucha	pretzel
138	black tea	meatball	celery	meatball	waffle	brown rice	almond butter	tortilla
139	burrito	coleslaw	jam	greek yogurt	bun	protein shake	raisin	hot dog
140	peach	pistachio	potato chip	brown rice	herbal tea	lasagna	wrap	latte
141	brussel sprout	greek yogurt	brown rice	raisin	protein bar	ginger	bun	chicken breast
142	latte	cinnamon	cherry	cottage cheese	black tea	raisin	date	potato chip
143	waffle	jam	raisin	black tea	burrito	french fries	mashed potato	bun
144	date	bun	cream cheese	orange juice	watermelon	pretzel	pecan	cinnamon
145	pumpkin	squash	kombucha	pretzel	brownie	chicken breast	pie	raisin
146	pretzel	baked potato	chicken salad	bun	hash brown	chickpea	protein bar	lemonade
147	porridge	candy	coke	pumpkin	french fries	cottage cheese	chicken salad	lasagna
148	french fries	mixed nut	bun	black bean	pretzel	kombucha	pistachio	cheeseburger
149	brown rice	lamb	peach	vegetable soup	latte	jam	flax	greek yogurt
150	chia seed	cheddar cheese	brownie	donut	jam	bun	sugar	black tea
151	sugar	tortilla	sugar	chicken salad	raisin	burrito	chia seed	soda
152	bun	parmesan	black bean	porridge	ginger	latte	sour cream	lamb
153	raisin	flax	salami	pickle	brown rice	cinnamon	hot dog	burrito
154	mozzarella	croissant	greek yogurt	parmesan	chickpea	black bean	pumpkin	kombucha
155	pickle	pretzel	pistachio	pecan	soda	hot dog	pumpkin seed	pickle
156	kiwifruit	latte	ginger	date	boiled egg	porridge	sushi	waffle
157	cherry	dressing	vegetable soup	chicken breast	lasagna	lamb	porridge	vegetable soup
158	cottage cheese	wrap	herbal tea	tortilla chip	porridge	cheeseburger	black tea	brussel sprout
159	hamburger	tortilla chip	pretzel	almond butter	coke	pickle	candy	protein shake
160	chicken breast	black tea	porridge	fries	brussel sprout	black tea	parmesan	coke
161	black bean	brownie	cottage cheese	sour cream	chicken salad	vegetable soup	squash	cottage cheese
162	lasagna	iced tea	waffle	beet	pistachio	protein bar	cheeseburger	mozzarella
163	almond butter	french fries	chickpea	pistachio	greek yogurt	pistachio	waffle	brown rice
164	pesto	pickle	mixed nut	potato chip	potato chip	waffle	blackberry	porridge
165	nacho	almond butter	date	pesto	lemonade	potato chip	burrito	chickpea
166	hot dog	hot dog	soda	lamb	date	tortilla chip	sauerkraut	pistachio
167	lamb	pumpkin	shake	lasagna	sour cream	pumpkin	brownie	chicken salad
168	salami	kombucha	chicken sandwich	waffle	black bean	date	orange juice	protein bar
169	sour cream	date	sardine	french fries	fried egg	pecan	kiwifruit	salami
170	bell pepper	boiled egg	pork chop	mozzarella	mac and cheese	nacho	cheddar cheese	nacho
171	ketchup	lasagna	cinnamon	hot dog	mozzarella	salami	latte	date
172	lemonade	pork chop	boiled egg	feta	gravy	beet	donut	pumpkin
173	tomato sauce	sushi	lemonade	squash	cottage cheese	coleslaw	lasagna	fried egg
174	coconut milk	fried egg	chicken wing	dip	nacho	almond butter	mixed nut	tortilla chip
175	dumpling	blackberry	whiskey	coleslaw	chicken sandwich	sour cream	lamb	boiled egg
176	pistachio	sour cream	beet	lemonade	coleslaw	parmesan	coleslaw	sour cream
177	hot chocolate	cheeseburger	muesli	protein bar	almond butter	squash	fries	parmesan
178	eggplant	diet coke	black tea	salami	stir fry	dip	boiled egg	pecan
179	beet	cranberry	fried egg	nacho	mixed nut	fried egg	pretzel	black bean
180	cheeseburger	stew	hash brown	boiled egg	squash	stir fry	croissant	eggplant
181	white wine	green salad	espresso	coconut milk	chocolate chip cookie	muesli	baked potato	pesto
182	beetroot	chickpea	cheese sandwich	fried egg	salami	boiled egg	kefir	dip
183	chicken salad	red pepper	coleslaw	cheddar cheese	tortilla chip	lemonade	pork chop	hot chocolate
184	feta	burrito	fried rice	cheeseburger	vegetable soup	mozzarella	shake	beet
185	quesadilla	donut	white wine	hot chocolate	kiwifruit	pesto	french fries	hash brown
186	stir fry	gravy	squash	kiwifruit	coconut milk	coke	tortilla chip	quesadilla
187	coke	porridge	stew	flax	pumpkin	mixed nut	coconut milk	gravy
188	muesli	protein bar	rib	stir fry	white wine	baked potato	dressing	diet coke
189	ramen	eggplant	nacho	chia seed	hot chocolate	diet coke	hash brown	fried rice
190	pastry	stir fry	pumpkin	goat cheese	kefir	cheddar cheese	stew	squash
191	tortilla chip	waffle	latte	eggplant	chia seed	feta	red pepper	pastry
192	dip	potato salad	pecan	burrito	chicken wing	soda	fried egg	coleslaw
193	vegetable soup	kefir	stir fry	baked potato	fried rice	hash brown	sardine	coconut milk
194	parmesan	cheese sandwich	dumpling	dressing	pesto	stew	stir fry	kiwifruit
195	flax	caesar salad	sauerkraut	red pepper	pumpkin seed	hot chocolate	sunflower seed	tomato sauce
196	hash brown	chocolate chip cookie	mozzarella	chocolate chip cookie	lamb	chia seed	salami	cheese sandwich
197	soda	hard boiled egg	fried chicken	protein shake	parmesan	chicken sandwich	pudding	feta
198	cocoa	mixed vegetable	baked potato	beetroot	pork chop	tomato sauce	gravy	mac and cheese
199	shake	grapefruit	eggplant	caramel	sauerkraut	gravy	plum	shake
200	falafel	sauerkraut	iced tea	cheddar	shake	flax	potato chip	stir fry
