# Supplementary material for: The diversity and consistency of what and when people eat
Source: Research Square preprint supplement (doi:10.21203/rs.3.rs-6149642/v1), 2025-08-05
Supplement: Supplementary file 4 [file bbeee87a296f196b03fe13b2.xlsx]

## Sheet: Table S4
Table S4
participant_number	Gender	Work Schedule	Age Group	TF50	TF50 Decile	Beginning of Eating Window	Ending of Eating Window	95%tile Eating Window	Beginning of Average Eating Window	Ending of Average Eating Window	First Food Shift	Last Food Shift	Average Daily Eating Window	Percent of Logs Outside Average Window	Food Diversity at 7 Days	Food Diversity at 14 Days	50 Percent Consumption	75 Percent Consumption	90 Percent Consumption
1	Female	Flexible Schedule	40-60	13.6667	4	9.53333	18.6333	9.1	9.97944	17.5695	0.969808	1.57321	7.5901	13.6905	54	77	13	34	53
2	Female	Regular Work Hours	<40	12.3167	1	7.67222	20.25	12.5778	8.08232	19.5106	0.477778	1.49091	11.4283	29.8701	32	48	14	26	39
3	Male	Regular Work Hours	<40	9.23333	0	7.16667	15.25	8.08333	7.56667	15.2567	0.336667	0.976667	7.69	22.314	27	38	10	19	27
4	Male	Regular Work Hours	<40	13.1083	3	6.44253	21.35	14.9075	8.04842	19.4805	2.25846	1.67684	11.4321	40.6977	24	33	7	15	24
5	Male	Regular Work Hours	40-60	12.4597	1	4.33215	19.8019	15.4698	5.9049	18.0557	1.41617	3.17317	12.1508	32.4324	23	28	6	12	19
6	Female	Long Work Hours	40-60	15.0085	7	9.3	19.9833	10.6833	10.1547	19.5759	1.41903	0.921944	9.42118	19.697	33	45	12	20	31
7	Male	Flexible Schedule	40-60	12.4825	1	8.50711	17.4142	8.90706	8.93444	16.9319	0.735389	0.854028	7.99742	35.8491	6	10	3	5	7
8	Male	Morning Shift	<40	13.8532	4	9.91667	20.1992	10.2825	11.0589	18.6436	1.83543	1.06434	7.58475	34.7826	50	73	20	42	61
9	Female	Regular Work Hours	40-60	15.239	7	8.43278	20.2257	11.793	9.48626	18.783	0.892179	1.90994	9.29675	20.9302	54	74	16	38	60
10	Female	Flexible Schedule	40-60	13.2086	3	7.5	20.2073	12.7073	8.04232	19.714	0.973313	1.26288	11.6717	17.4825	39	57	12	26	43
11	Female	Regular Work Hours	>60	13.4667	3	4.75281	18.25	13.4972	5.16654	16.8267	0.395076	2.20331	11.6602	36.7816	19	41	6	17	32
12	Female	Flexible Schedule	>60	11.2	0	4.96767	17.5508	12.5832	5.33376	15.6483	0.89906	1.73331	10.3146	25.4717	24	31	5	13	22
13	Female	Long Work Hours	<40	9.50472	0	6.75583	18.02	11.2642	7.31407	17.3742	0.997828	0.61803	10.0602	31.7757	35	59	15	31	48
14	Male	Flexible Schedule	<40	14	5	7.90806	21.1833	13.2753	9.71292	18.7182	2.25986	2.01091	9.0053	47.4227	40	59	13	28	47
15	Female	Long Work Hours	40-60	17.2667	9	7.14	21.8385	14.6985	9.41647	21.2218	2.17712	1.64754	11.8053	14.094	35	56	6	16	35
16	Female	Regular Work Hours	40-60	13.2167	3	6.9901	20.6667	13.6766	7.5719	19.9706	1.53218	1.36907	12.3987	30	46	53	11	22	38
17	Female	Regular Work Hours	>60	14.8333	6	8.44685	21.4892	13.0423	10.5936	19.6452	2.64733	1.756	9.05161	16.8224	34	49	13	25	39
18	Female	Flexible Schedule	40-60	15.0439	7	9.66667	22.5167	12.85	11.602	21.0346	2.30491	1.16463	9.43259	29.2929	30	57	13	31	47
19	Male	Regular Work Hours	40-60	12.9197	2	7.95667	21.302	13.3453	9.335	18.6519	1.60333	2.21433	9.31694	40	11	14	2	6	11
20	Female	Regular Work Hours	40-60	13.9746	5	8.40269	21.09	12.6874	10.0835	18.1439	1.44114	2.12273	8.06035	26.1905	34	49	11	26	40
21	Female	Flexible Schedule	>60	13.5521	4	8.22566	20.0688	11.8431	8.90686	18.689	1.38365	1.71011	9.78209	24.1379	31	42	7	15	25
22	Female	Flexible Schedule	<40	13.6061	4	8.58206	21.5383	12.9562	10.2799	19.8348	1.53506	1.40653	9.55494	38	22	32	9	16	26
23	Female	Regular Work Hours	<40	13.3333	3	8	21	13	8.5628	19.8823	0.74015	1.3656	11.3195	20.1117	42	67	14	30	49
24	Female	Regular Work Hours	40-60	14.0021	5	7.26706	20.085	12.8179	8.36532	18.2029	1.87083	1.81829	9.83762	23.1707	26	38	6	17	29
25	Female	Flexible Schedule	<40	15.1322	7	7.20106	19.8696	12.6686	8.6851	19.646	2.19716	1.11865	10.9609	12.7451	50	73	16	35	57
26	Female	Flexible Schedule	<40	12.95	2	7.35792	18.8	11.4421	7.82125	18.3237	0.684008	0.935595	10.5024	14.2857	45	72	14	29	47
27	Male	Regular Work Hours	40-60	11.75	0	8.08089	18.7909	10.71	9.12894	17.88	1.63942	1.62634	8.75111	35.443	20	33	5	14	24
28	Male	Regular Work Hours	<40	13.0667	2	6.5	21.7464	15.2464	8.70278	19.0141	1.349	1.11523	10.3114	14.9254	48	70	16	34	55
29	Male	Flexible Schedule	<40	15.5003	7	10.7712	21.9667	11.1955	11.5692	20.5895	1.08537	1.07861	9.02035	35.5556	2	3	2	3	3
30	Female	Flexible Schedule	40-60	14	5	7.94583	23.2274	15.2815	9.45932	19.4455	1.07718	3.0035	9.98622	15.493	18	27	6	11	19
31	Female	Flexible Schedule	40-60	12	0	7.2575	19.595	12.3375	7.79153	18.7131	0.552381	0.960714	10.9216	12.2905	29	48	10	21	33
32	Female	Regular Work Hours	40-60	12.8242	2	7.01236	22.8395	15.8272	8.47662	21.2597	1.99402	2.15118	12.7831	21.8487	33	51	8	20	34
33	Female	Flexible Schedule	<40	13.3436	3	7.85	20.026	12.176	9.2275	19.7068	2.05817	1.09456	10.4793	18.3246	53	82	17	39	63
34	Female	Rotating Shift	40-60	13.8844	5	7.02494	24.7	17.6751	8.11722	19.2148	1.34182	3.71798	11.0976	26.4706	35	61	17	39	53
35	Male	Rotating Shift	<40	16.8167	9	4.94158	23.9535	19.0119	11.4606	20.633	3.98158	2.90514	9.17239	53.1915	20	24	6	11	18
36	Female	Flexible Schedule	40-60	17.1972	9	9.51667	25.3147	15.798	11.2398	23.1037	1.32548	3.30422	11.8639	31.0811	41	62	11	25	47
37	Female	Long Work Hours	<40	15.6167	8	8.21458	22.2642	14.0496	9.08452	21.1286	0.917302	1.2928	12.044	19.6078	32	38	5	15	26
38	Male	Long Work Hours	<40	16.5022	8	9.32242	21.7545	12.4321	10.2076	20.7472	1.72325	2.47813	10.5396	15.0289	28	44	7	16	27
39	Male	Regular Work Hours	40-60	12.6333	1	8.09967	19.4728	11.3731	8.58982	18.9375	0.856845	0.757639	10.3476	21.8391	19	24	3	8	18
40	Female	Regular Work Hours	40-60	16.8	9	5.22794	27.0324	21.8044	10.9929	20.257	3.00266	3.02162	9.26405	32.4675	32	47	12	25	39
41	Male	Regular Work Hours	40-60	16.8793	9	7.58083	23.0392	15.4583	10.081	19.5953	2.70573	2.41509	9.51427	33.3333	29	41	8	20	33
42	Female	Regular Work Hours	>60	16.0649	8	7.16667	18.6495	11.4828	9.49707	18.1214	3.7069	0.951645	8.62434	15.625	30	54	10	23	40
43	Male	Regular Work Hours	40-60	15.5	7	8.54215	22.995	14.4528	9.36409	21.3984	1.35476	2.29968	12.0343	18.4932	37	55	10	25	39
44	Male	Flexible Schedule	>60	16.3986	8	7.50042	19.9088	12.4083	8.22727	18.7468	2.0573	1.06136	10.5196	12.963	25	45	7	17	31
45	Male	Regular Work Hours	40-60	12.5	1	10.4333	20.0583	9.625	11	18.8895	1.79028	1.12069	7.88951	27.5591	52	80	17	34	53
46	Female	Regular Work Hours	<40	11.3917	0	8.76708	19.8942	11.1271	9.58182	18.8167	1.03939	0.495455	9.23485	47.619	19	25	4	9	18
47	Male	Regular Work Hours	<40	13.1417	3	8.9389	21.1544	12.2155	9.72745	19.9005	1.28602	1.16606	10.1731	15.7143	49	57	16	30	45
48	Female	Regular Work Hours	40-60	13.3	3	6.54917	17.4892	10.94	8.10008	16.5238	1.52738	0.82381	8.42373	26.6667	7	8	3	4	5
49	Female	Flexible Schedule	40-60	13.8275	4	8.51997	21.1354	12.6154	10.8764	19.7387	1.88116	1.99065	8.86225	31.25	20	30	6	15	24
50	Male	Regular Work Hours	40-60	12.7675	2	8.5	20.756	12.256	9.14861	19.5427	1.10181	1.60343	10.3941	13.2597	23	30	8	14	20
51	Female	Flexible Schedule	40-60	14.71	6	8.1216	22.5	14.3784	8.648	21.303	0.928095	3.44	12.655	10.5023	51	86	14	35	63
52	Male	Long Work Hours	40-60	13.8833	5	7.28306	21.775	14.4919	8.63944	20.154	0.830787	4.39285	11.5146	50.3311	49	65	11	26	48
53	Female	Flexible Schedule	<40	13.7208	4	7.7061	22.1776	14.4715	9.28296	18.5787	2.10782	4.55865	9.29573	48.1818	25	33	6	13	22
54	Female	Regular Work Hours	<40	13.35	3	8.43333	19.65	11.2167	9.57859	19.551	0.970198	2.32819	9.97242	16.6667	45	67	4	18	43
55	Male	Regular Work Hours	40-60	18.1494	9	9.70646	20.5536	10.8472	11.2093	19.7723	1.89708	0.573542	8.56294	25.5952	53	60	16	31	44
56	Female	Regular Work Hours	40-60	12.506	1	6.68306	20.0034	13.3203	8.20417	19.274	1.62161	1.07669	11.0698	27.1429	38	55	12	25	41
57	Female	Flexible Schedule	<40	12.6747	2	7.28778	22.5667	15.2789	7.89107	20.3681	0.922671	3.88551	12.4771	21.118	47	81	17	36	63
58	Male	Regular Work Hours	>60	13.4083	3	6.36625	19.2204	12.8542	7.0803	16.8394	1.53333	3.15788	9.75909	39.2857	33	37	9	17	27
59	Male	Long Work Hours	<40	18.4719	9	8.84167	22.7458	13.9042	11.0619	20.1203	2.51088	1.37551	9.05833	27.9661	24	26	7	13	17
60	Female	Regular Work Hours	>60	13.4142	3	7.49072	20.5067	13.0159	7.73482	18.5953	0.757381	0.518611	10.8605	18.1347	42	59	13	27	41
61	Female	Rotating Shift	40-60	13.95	5	5.75312	20.2658	14.5127	8.71458	18.8004	1.7444	2.20036	10.0858	27.0833	83	134	24	56	96
62	Male	Regular Work Hours	>60	14.8667	7	8.86583	21.0558	12.19	9.93182	19.6712	1.63636	1.9103	9.73939	28.1553	38	51	12	25	39
63	Male	Regular Work Hours	40-60	13.6633	4	7.28375	20.3742	13.0904	8.14899	19.7204	1.19137	1.25569	11.5714	17.3469	39	49	8	20	33
64	Female	Flexible Schedule	<40	14.4333	6	9.25	22.0667	12.8167	9.61154	20.9072	0.990833	2.10323	11.2957	16.3366	26	36	6	13	21
65	Female	Flexible Schedule	40-60	17.0147	9	9.5	22.1285	12.6285	10.9089	20.6821	1.56671	2.04572	9.77324	42.7273	33	56	10	25	44
66	Female	Regular Work Hours	40-60	13.4833	4	5.31667	22.67	17.3533	8.63895	21.0334	1.6698	2.98883	12.3945	18.0258	42	72	12	30	48
67	Female	Flexible Schedule	40-60	16.425	8	8.7184	21.6	12.8816	10.3063	21.2159	2.74872	1.25714	10.9097	21.4286	29	60	11	24	43
68	Male	Long Work Hours	40-60	15.5419	8	7.23983	20.04	12.8002	7.35319	19.6789	1.03831	0.81629	12.3257	10.8527	39	57	10	21	41
69	Female	Flexible Schedule	<40	15.1442	7	9.22083	23	13.7792	10.1784	20.9929	1.17804	1.89234	10.8145	21.978	56	100	20	42	73
70	Male	Regular Work Hours	<40	16.35	8	7.995	22.0242	14.0292	11.0145	20.0904	1.97808	2.29908	9.07589	44.3038	26	44	9	23	36
71	Male	Regular Work Hours	40-60	14.6583	6	9.44292	20.5937	11.1508	10.1557	19.6014	0.956845	1.67813	9.44571	45	3	3	2	3	3
72	Female	Regular Work Hours	<40	14.1	5	7.91722	23.3333	15.4161	9.38733	20.3047	1.34049	2.11494	10.9174	18.2741	36	69	11	26	46
73	Female	Flexible Schedule	40-60	13.8667	4	7.16667	20.3786	13.2119	7.44121	19.2213	0.831627	1.2847	11.78	15.9204	44	81	18	38	58
74	Female	Rotating Shift	40-60	13.0422	2	9.04729	21.0646	12.0173	9.70176	20.2629	1.74104	1.09847	10.5612	15.534	43	55	6	22	42
75	Female	Regular Work Hours	<40	15.5	7	9.49935	23.1996	13.7002	10.5827	20.1006	2.01836	2.29819	9.51785	41.25	24	33	7	15	26
76	Female	Flexible Schedule	40-60	13.9083	5	8.62125	20.6621	12.0408	9.80303	18.8228	0.804419	1.86308	9.01975	32	19	25	5	11	20
77	Male	Long Work Hours	40-60	15	7	10.1167	20.0333	9.91667	10.6236	19.9292	0.755556	0.205556	9.30556	27.6423	21	31	6	11	19
78	Male	Night Shift	<40	19.4	9	10.2104	24.0792	13.8688	12.5942	22.1192	2.40985	1.96061	9.52503	22.9167	30	60	11	27	47
79	Female	Flexible Schedule	<40	15.7167	8	10.0757	19.1674	9.09173	11.061	19.2036	1.37509	1.21921	8.14257	10	50	71	13	31	52
80	Female	Flexible Schedule	40-60	14.6667	6	8.49833	19.6283	11.13	9.80303	18.6027	1.11581	0.90447	8.79962	42.2222	32	36	9	19	29
81	Female	Long Work Hours	<40	14.1667	5	8.48867	19.1029	10.6142	9.86246	18.9641	1.02012	0.563988	9.10163	18.3432	55	83	15	37	62
82	Male	Flexible Schedule	>60	11.2408	0	8.1075	19.2833	11.1758	8.87489	17.4195	0.714316	2.86154	8.54462	40	9	11	3	5	8
83	Female	Regular Work Hours	40-60	13.7333	4	7.01181	20.7333	13.7215	8.31175	18.7426	1.79316	2.89859	10.4309	23.3645	37	52	12	25	38
84	Female	Regular Work Hours	40-60	13.2731	3	5.77674	20.0875	14.3108	7.6073	18.7783	2.43712	1.96294	11.171	23.0769	36	56	11	26	44
85	Female	Flexible Schedule	40-60	14.3833	6	9.4	18.5927	9.19267	9.95133	17.9862	1.50347	0.702472	8.03486	26.8041	34	60	10	24	45
86	Female	Morning Shift	40-60	12.7417	2	6.90042	19.4733	12.5729	8.575	18	2.55167	2.03386	9.425	27.9412	10	19	3	7	12
87	Female	Flexible Schedule	>60	17.05	9	8.854	23.5033	14.6493	10.3578	21.0405	1.82222	1.67024	10.6827	26.5487	40	60	13	27	44
88	Female	Regular Work Hours	>60	15.1658	7	8.21958	18.9755	10.7559	9.92209	18.5724	1.69526	0.92485	8.65032	23.6559	27	36	6	13	24
89	Female	Flexible Schedule	<40	12.2633	1	7.967	19.2317	11.2647	8.7826	17.9629	1.03976	0.844306	9.18028	23.9316	39	62	14	28	47
90	Female	Flexible Schedule	40-60	13.7833	4	9.07125	21.925	12.8537	9.00129	21.0123	0.840516	1.44325	12.011	7.18232	49	76	9	27	56
91	Female	Morning Shift	<40	12.4876	1	8.27042	21.427	13.1566	9.6953	20.0342	2.04718	1.99231	10.3389	28.2609	36	47	10	20	36
92	Male	Rotating Shift	<40	15.8722	8	9.92917	20.45	10.5208	11.469	20.4535	1.44988	1.32369	8.98444	5.75916	47	75	11	30	56
93	Female	Flexible Schedule	40-60	15.5103	7	8.50411	24.0733	15.5692	10.027	20.9386	1.60032	2.16731	10.9115	23.5955	37	55	16	29	45
94	Female	Regular Work Hours	40-60	13.3833	3	7.47333	22.465	14.9917	8.30333	21.6508	0.81381	2.46738	13.3475	24.1611	32	47	9	19	31
95	Male	Flexible Schedule	40-60	14.25	5	10.0326	20.3106	10.278	10.8152	19.0776	1.351	1.68038	8.26241	20.6186	16	40	7	17	30
96	Female	Flexible Schedule	<40	13.475	4	8.98958	20.9654	11.9758	9.65345	19.5736	0.499213	1.76403	9.92016	20.5882	4	5	1	2	3
97	Female	Flexible Schedule	<40	12.7988	2	8	18.4971	10.4971	8.4325	17.8191	0.294722	1.38213	9.38662	27.1429	17	24	4	9	16
98	Female	Regular Work Hours	40-60	16.7342	9	8.64024	22.9946	14.3544	10.5651	20.1709	4.28962	2.5502	9.60581	28.2258	34	48	11	24	35
99	Female	Regular Work Hours	<40	15.2394	7	9.00233	23.2704	14.2681	9.97275	19.8944	1.39377	3.3263	9.9216	22.807	26	40	11	23	33
100	Male	Regular Work Hours	<40	14.6333	6	7.64792	22.9229	15.275	8.1619	21.2	0.954901	2.7044	13.0381	21.7949	10	11	3	4	7
101	Female	Flexible Schedule	40-60	13.2647	3	6.03351	19.0701	13.0366	7.16734	18.696	1.67512	1.25	11.5286	14.2857	26	53	6	19	37
102	Male	Flexible Schedule	40-60	15.3317	7	7.99406	21.5833	13.5893	8.40109	20.7333	1.41782	1.30552	12.3322	18.3761	50	61	11	24	39
103	Female	Regular Work Hours	40-60	15.8167	8	10.8046	21.0121	10.2075	11.2115	19.9238	0.806548	1.4131	8.71232	22.2222	45	76	17	36	55
104	Female	Regular Work Hours	<40	13.1833	3	7.78333	24.5597	16.7764	8.64229	20.8248	1.28239	1.79673	12.1825	13.986	50	67	10	27	50
105	Male	Flexible Schedule	40-60	14.25	5	7.76121	21.3375	13.5763	9.18466	20.7663	2.36024	1.33246	11.5817	11.2299	68	92	16	42	72
106	Female	Flexible Schedule	<40	13.2068	3	9.35	19.8075	10.4575	10.2182	19.1718	1.19356	2.0147	8.95354	25.5102	26	35	8	16	26
107	Female	Regular Work Hours	40-60	12.2181	1	7.22501	18.5683	11.3433	7.72988	17.9471	0.785139	1.31657	10.2172	28.3784	28	43	8	18	29
108	Female	Flexible Schedule	>60	13.5388	4	6.65535	21.1023	14.447	7.59026	18.6827	1.01742	3.5323	11.0924	16.6667	36	66	14	30	52
109	Female	Flexible Schedule	40-60	15.675	8	9.505	19.9167	10.4117	11.3295	19.1159	2.35897	0.869615	7.78639	17	38	52	11	22	37
110	Female	Long Work Hours	40-60	17.0636	9	7.68422	26.4733	18.7891	13.7307	21.0249	3.74311	4.08844	7.29417	42.1053	30	41	13	22	33
111	Female	Regular Work Hours	<40	14.0667	5	7.54167	23.2667	15.725	9.17083	20.5198	1.65	1.40625	11.349	21.2121	59	87	19	40	65
112	Male	Flexible Schedule	40-60	12.45	1	7.06667	19.82	12.7533	9.0641	18.3535	1.05385	2.35667	9.28944	36.2694	25	44	9	19	29
113	Female	Flexible Schedule	>60	13.4	3	8.21667	18.3667	10.15	8.80385	18.05	0.753846	0.898718	9.24615	19.7531	48	77	14	33	57
114	Female	Regular Work Hours	<40	13.6917	4	7.94833	24.1	16.1517	8.88716	20.1694	0.925812	3.68511	11.2822	23.4694	26	47	10	23	37
115	Female	Regular Work Hours	<40	15.8667	8	5.95833	25.775	19.8167	10.0417	22.681	3.53496	2.2878	12.6393	21.2766	24	34	5	14	22
116	Female	Regular Work Hours	40-60	17.2439	9	7.10056	19.9369	12.8364	7.55216	19.4368	0.650769	0.873162	11.8846	14.0496	43	63	11	30	50
117	Female	Regular Work Hours	<40	10	0	8.12417	20.3333	12.2092	8.87692	17.671	0.872727	2.70836	8.79409	29.7619	17	31	5	13	22
118	Male	Long Work Hours	40-60	14.9167	7	9.03501	20.6657	11.6307	10.8918	18.9182	2.02348	1.59561	8.02641	22.9885	22	33	9	17	25
119	Female	Flexible Schedule	40-60	12.4	1	5.12889	20.0008	14.8719	7.07848	17.8191	3.87947	3.96513	10.7406	26.3158	41	57	10	24	43
120	Male	Regular Work Hours	40-60	12.6	1	7.375	20.1767	12.8017	8.20083	19.638	1.62194	1.38889	11.4371	14.0187	26	40	5	15	28
121	Female	Flexible Schedule	>60	15.4333	7	9.2	23.5667	14.3667	10.6379	20.494	1.51923	1.42402	9.85607	19.9234	54	82	10	28	54
122	Female	Flexible Schedule	>60	13.9	5	8.61667	20.4667	11.85	9.33726	19.7243	0.64494	1.09429	10.387	24.3781	31	53	9	22	37
123	Female	Long Work Hours	40-60	13.3667	3	8.06422	20.0167	11.9524	9.31956	19.3771	0.815437	0.674008	10.0575	19.1919	33	59	13	33	49
124	Female	Regular Work Hours	40-60	13.4286	3	7.80875	19.1692	11.3604	7.96496	17.4776	0.755575	1.90901	9.51266	23.6842	26	37	6	14	22
125	Female	Regular Work Hours	40-60	15.4333	7	7.5	20.5	13	9.52933	19.6087	1.65719	1.75978	10.0794	28.3951	31	52	15	31	44
126	Female	Flexible Schedule	40-60	13.4388	3	9.04935	22.3803	13.3309	9.87218	20.8153	1.40671	1.88607	10.9431	20.3947	35	49	8	19	33
127	Female	Flexible Schedule	40-60	13	2	5.15	19.9982	14.8482	5.75254	19.5219	1.14395	1.2569	13.7694	7.77778	42	73	12	32	55
128	Male	Regular Work Hours	<40	12.3333	1	7.33333	19.4178	12.0845	7.61818	18.4783	0.508141	2.31575	10.8601	24.1935	4	4	1	2	4
129	Female	Regular Work Hours	40-60	12.325	1	6.5	20.2197	13.7197	7.22983	18.204	0.696333	3.01958	10.9742	37.1429	37	41	4	15	28
130	Female	Flexible Schedule	>60	16.5094	8	9.51389	26.9104	17.3966	11.0784	21.8016	2.50572	2.18884	10.7233	17.5758	66	78	17	39	57
131	Male	Regular Work Hours	>60	14.55	6	7.48333	19.85	12.3667	9.22833	18.8249	2.78114	1.63167	9.59658	23.6842	32	38	9	20	30
132	Female	Flexible Schedule	40-60	17.1417	9	7.66042	21.3562	13.6958	8.71026	19.7568	1.33718	1.98077	11.0466	26.4151	25	43	5	17	32
133	Male	Flexible Schedule	40-60	12.8275	2	6.88458	20.8011	13.9165	8.36903	19.9017	2.33837	1.23238	11.5327	19	4	4	1	2	3
134	Female	Flexible Schedule	<40	13.3667	3	8.08333	19.4	11.3167	8.92121	18.9485	1.42576	1.16667	10.0273	12.8788	27	43	10	21	31
135	Female	Flexible Schedule	40-60	14.3761	6	7.40146	19.8094	12.408	8.9696	18.2294	2.02931	1.17224	9.25982	25.1656	60	78	16	34	58
136	Male	Flexible Schedule	<40	14.3287	6	8.26889	22.0785	13.8096	9.85958	20.9096	1.65308	1.373	11.05	27.907	10	19	4	9	14
137	Female	Long Work Hours	>60	15.8317	8	8.61061	24.6863	16.0757	9.4065	23.2286	1.43934	1.67073	13.8221	25.6637	14	18	4	7	11
138	Female	Long Work Hours	<40	14.0333	5	7.23333	19.3517	12.1183	8.85155	18.048	1.67597	2.04786	9.19641	20.3593	41	57	9	21	39
139	Female	Long Work Hours	<40	13.2833	3	8.9749	21.5331	12.5582	9.89081	19.8164	0.829048	1.83369	9.92563	39.4737	33	48	11	24	36
140	Male	Regular Work Hours	40-60	13.7833	4	7.78611	20.7117	12.9256	8.10296	19.5651	0.854802	2.33671	11.4621	11.3636	35	52	8	20	34
141	Female	Flexible Schedule	>60	12.2667	1	7.00394	20.6251	13.6212	8.50657	19.6401	1.79317	1.88798	11.1335	18.8525	30	53	7	20	37
142	Female	Regular Work Hours	40-60	13	2	8	19.5566	11.5566	8.243	19.6373	0.526468	1.01833	11.3943	5.78512	53	74	9	25	49
143	Female	Flexible Schedule	>60	14.0508	5	7.72426	20.0185	12.2943	8.48137	18.472	1.85346	2.23511	9.99064	20.4724	37	59	13	28	45
144	Female	Long Work Hours	40-60	13.3333	3	8.025	20.3543	12.3293	8.6873	17.7964	0.803214	1.29097	9.10913	27.4725	37	59	11	26	46
145	Female	Long Work Hours	40-60	19.6324	9	11.5709	26.2688	14.6978	12.8951	23.0139	1.969	1.99728	10.1188	25.8065	34	49	13	24	39
146	Female	Flexible Schedule	<40	13.3333	3	8.07729	22.493	14.4157	9.11498	19.7313	1.35222	2.92063	10.6163	35.2941	10	14	3	6	10
147	Female	Flexible Schedule	40-60	12.8167	2	9.46667	19.85	10.3833	9.64167	19.0569	0.972222	0.930417	9.41528	12.4183	34	42	9	17	29
148	Female	Regular Work Hours	40-60	12.55	1	8.36021	20.9083	12.5481	9.64051	19.1033	1.26551	2.27338	9.4628	29.4118	42	59	12	31	48
149	Male	Flexible Schedule	<40	18	9	8.89625	21.7675	12.8712	10.141	21.1614	1.75349	1.45028	11.0204	17.1875	44	79	14	33	55
150	Female	Long Work Hours	40-60	14.3733	6	7.8748	22.823	14.9482	8.42585	21.6284	1.33132	1.50812	13.2025	11.3924	32	71	14	32	55
151	Female	Flexible Schedule	40-60	14.15	5	6.81667	20.51	13.6933	7.83452	18.9821	1.09663	1.87972	11.1476	20.8	31	41	9	20	30
152	Female	Regular Work Hours	<40	15.7333	8	7.08667	23.795	16.7083	8.14643	21.0373	1.325	3.32095	12.8909	22.3529	35	51	10	26	41
153	Female	Regular Work Hours	>60	14.1656	5	7.04	20	12.96	9.98571	19.3299	1.91548	1.55667	9.34417	38.9381	22	32	6	11	19
154	Female	Regular Work Hours	40-60	13.1746	3	7.77341	22.6254	14.852	9.38632	21.2085	1.76338	0.819537	11.8222	27.381	21	49	9	24	39
155	Female	Regular Work Hours	40-60	14.2042	5	7.67544	21.4717	13.7962	9.71708	20.2051	1.59914	1.46361	10.488	32	19	31	5	12	22
156	Male	Regular Work Hours	>60	13.5121	4	6.42972	19.532	13.1023	8.34838	18.9406	2.11115	1.52752	10.5922	28.125	23	44	5	17	33
157	Female	Regular Work Hours	40-60	12.8167	2	6.74083	19.9833	13.2425	7.1497	18.5784	0.794306	1.11627	11.4287	13.0081	43	64	8	24	47
158	Female	Long Work Hours	40-60	14.6708	6	8.56376	21.6396	13.0759	9.45906	21.1595	1.68647	1.09816	11.7004	13.1579	25	41	3	14	26
159	Male	Flexible Schedule	<40	14.2067	5	8.34686	22.3395	13.9927	9.0896	20.0065	1.00204	1.62948	10.9169	17.8947	39	68	17	35	55
160	Female	Flexible Schedule	<40	13.475	4	8.98275	19.4669	10.4841	10.323	18.7381	1.45449	0.990253	8.4151	35.1852	2	4	2	2	3
161	Male	Flexible Schedule	<40	14.1814	5	7.67611	21.4833	13.8072	8.50667	19.4039	1.30717	2.21339	10.8972	17.284	34	37	9	19	29
162	Female	Regular Work Hours	<40	15.7833	8	10.7667	19.8	9.03333	11.0929	19.5833	0.532024	0.911905	8.4904	17.0616	38	49	12	24	34
163	Male	Flexible Schedule	40-60	18.7024	9	13.4375	23.7812	10.3438	14.6181	22.1734	2.06801	0.790833	7.5553	34.2105	38	47	12	23	36
164	Male	Flexible Schedule	<40	13.6403	4	8.10564	20.4095	12.3038	8.55859	19.5501	0.842599	1.50522	10.9915	16.8067	24	36	7	15	24
165	Male	Flexible Schedule	<40	17.3667	9	11.3333	22.7833	11.45	12.5428	20.9363	1.44789	1.56488	8.3935	23.8095	32	39	11	20	28
166	Male	Regular Work Hours	<40	15.2704	7	11.1687	19.9481	8.77935	11.639	18.9331	0.686389	1.10311	7.29412	28	22	29	8	14	21
167	Female	Regular Work Hours	40-60	13.2	3	7.61372	21.141	13.5273	8.60772	19.7349	1.33196	1.78889	11.1272	17.5258	35	54	8	24	42
168	Female	Regular Work Hours	<40	15.1232	7	9.26542	20.1167	10.8513	11.4958	19.6279	2.90008	1.32181	8.13208	33.3333	35	47	14	25	38
169	Male	Flexible Schedule	<40	12.2606	1	7.99667	20.8767	12.88	8.86152	18.6667	0.8225	1.8098	9.80515	27.6923	21	29	6	13	21
170	Female	Flexible Schedule	40-60	14.0417	5	7.56667	20.5741	13.0074	9.54004	19.5244	2.37889	2.22302	9.98435	23.4694	33	54	8	23	40
171	Female	Long Work Hours	<40	15.2397	7	8.08444	20.4569	12.3725	10.3277	18.5362	2.01864	2.7371	8.20854	41.4634	24	29	7	15	24
172	Female	Regular Work Hours	40-60	12.3417	1	7.75	19.4271	11.6771	9.00596	18.0121	1.5103	1.14043	9.00616	26.5625	31	37	7	19	30
173	Female	Flexible Schedule	40-60	12.2833	1	6.35612	17.8621	11.506	6.75401	17.3513	0.507063	0.40996	10.5973	23.3333	8	10	2	3	6
174	Male	Regular Work Hours	<40	12.5771	1	11.4833	19.3956	7.91222	11.8653	18.4154	0.984861	0.952963	6.55002	53.1915	31	54	13	27	43
175	Male	Regular Work Hours	40-60	14.4	6	7.01333	21.2567	14.2433	8.31212	20.4561	2.03384	0.832222	12.1439	21.9178	20	30	5	11	22
176	Female	Regular Work Hours	40-60	14.2167	5	8.09917	19.3354	11.2363	9.76033	18.391	1.31338	1.66672	8.63063	16.2162	25	49	13	29	41
177	Male	Flexible Schedule	40-60	15.9114	8	11.1467	22.9592	11.8125	12.2293	20.4516	1.40429	1.8953	8.22225	21.4286	42	56	12	25	42
178	Male	Regular Work Hours	40-60	13.9333	5	8.14453	20.57	12.4255	9.98002	20.1202	1.72726	0.950913	10.1402	41.0256	30	52	10	23	38
179	Female	Regular Work Hours	40-60	15.4417	7	8.25799	22.325	14.067	9.11788	20.3155	1.50513	3.40936	11.1976	8.73016	33	45	8	18	29
180	Male	Flexible Schedule	<40	14.5333	6	8.46667	21.3325	12.8658	10.2081	19.9319	2.375	1.966	9.7238	25.1534	26	31	7	13	20
181	Male	Regular Work Hours	40-60	17.6667	9	8.57171	18.8683	10.2966	9.18887	18.4042	1.04347	1.43613	9.21534	18.8235	39	54	12	26	38
182	Female	Flexible Schedule	<40	15	7	7.61915	20.7195	13.1003	9.39551	19.5418	0.65351	1.37215	10.1463	22.9167	10	17	3	8	13
183	Male	Flexible Schedule	>60	18.2833	9	11.7167	19.9501	8.23344	13.0006	19.8505	1.41406	1.08801	6.84987	24.9135	71	106	21	48	76
184	Female	Flexible Schedule	<40	14.6242	6	9.49479	19.5333	10.0385	10.5813	18.6131	1.30606	1.11083	8.03174	16.2162	24	33	8	17	25
185	Male	Flexible Schedule	<40	14.5167	6	8.155	19.9667	11.8117	8.34966	18.6439	0.577163	1.55476	10.2942	19.5489	39	58	13	26	44
186	Female	Flexible Schedule	40-60	14.5667	6	8.73	23.2033	14.4733	9.12373	20.7024	0.802837	2.55117	11.5787	16.2162	28	35	6	11	20
187	Female	Regular Work Hours	40-60	11.5667	0	6.33333	18.0431	11.7097	7.45758	17.3898	1.01515	1.24215	9.9322	41.2844	39	55	15	27	39
188	Male	Regular Work Hours	<40	13.945	5	10.6833	23.0208	12.3375	12.2905	20.9329	1.52727	2.10293	8.64247	23.0769	30	48	10	24	39
189	Female	Flexible Schedule	40-60	12.9885	2	9.63333	19.3833	9.75	10.0607	18.9925	0.510714	0.985238	8.93181	26.1194	22	37	6	16	25
190	Male	Regular Work Hours	40-60	13.3833	3	8.45	19.5508	11.1008	9.81154	18.9423	0.798718	0.587179	9.13077	28.5714	26	34	8	16	25
191	Female	Flexible Schedule	40-60	13.1528	3	7.24333	24.0158	16.7725	8.092	20.0002	0.879425	3.49615	11.9082	30.0813	30	40	7	15	27
192	Female	Regular Work Hours	<40	12.1294	1	6.68333	19.8732	13.1898	7.20821	19.1787	0.476687	1.38456	11.9705	20.2381	40	52	6	19	37
193	Female	Flexible Schedule	<40	16.6667	8	11.0167	18.7442	7.7275	11.5761	18.1318	0.7835	0.304222	6.55567	40.724	63	88	21	44	65
194	Male	Flexible Schedule	<40	12.6731	1	8.33333	19.4016	11.0682	8.9479	17.5451	0.678687	1.62505	8.59717	29.4737	19	31	4	14	22
195	Female	Flexible Schedule	<40	13.2522	3	7.285	18.9167	11.6317	7.30144	15.5264	0.762444	1.49833	8.225	15.7576	25	42	8	16	26
196	Female	Long Work Hours	<40	13.8532	4	7.55499	23.2964	15.7414	8.00656	21.4948	1.19483	2.22581	13.4882	21.875	41	64	9	25	43
197	Male	Long Work Hours	40-60	17.2839	9	8.2025	21.7167	13.5142	11.2714	20.1733	2.03364	1.74465	8.90194	31.25	31	35	4	11	23
198	Male	Regular Work Hours	<40	13.4076	3	9	22.7487	13.7487	10.0902	20.3892	1.68898	2.51449	10.2989	35.4839	20	33	7	15	25
199	Male	Long Work Hours	40-60	13.1333	3	7.78	20.5464	12.7664	8.53889	19.6947	0.9375	1.27319	11.1558	21.8045	54	96	24	57	81
200	Female	Flexible Schedule	40-60	17.4992	9	6.9	20.0192	13.1192	7.31144	18.0719	1.11378	3.16472	10.7605	60.4396	40	48	9	24	39
201	Female	Regular Work Hours	<40	13.0667	2	6.24969	21.2624	15.0128	7.34117	20.281	1.47889	2.68837	12.9398	18.239	49	81	14	36	62
202	Female	Long Work Hours	40-60	14.2279	5	8.27958	18.7596	10.48	9.75804	18.1845	2.08357	0.999841	8.42649	33.3333	12	13	3	7	10
203	Female	Flexible Schedule	40-60	13.3	3	6.72375	19.2583	12.5346	9.55134	18.0297	1.6237	1.97625	8.47836	25.7576	31	50	13	26	39
204	Female	Regular Work Hours	40-60	15.1667	7	7.93837	22.6979	14.7595	9.2197	19.8209	1.32322	2.53715	10.6012	36.3636	23	35	10	19	27
205	Male	Regular Work Hours	40-60	16.4656	8	8.50707	21.178	12.6709	10.3767	18.2303	1.41694	1.6972	7.85361	38.7097	29	43	10	21	34
206	Female	Flexible Schedule	40-60	16.1187	8	7.73611	27.585	19.8489	11.1283	22.3775	4.0362	3.24419	11.2492	23.6111	29	41	9	19	32
207	Male	Regular Work Hours	<40	12.8006	2	8.27502	20.1451	11.8701	8.84819	18.8727	1.09363	1.51843	10.0245	25.4902	20	25	3	7	15
208	Female	Rotating Shift	<40	16.15	8	9.39333	21.6	12.2067	10.219	20.2587	2.25598	3.22974	10.0397	29.1925	60	88	20	43	70
209	Male	Regular Work Hours	40-60	11.75	0	9	21.9299	12.9299	9.41538	21.2845	0.585934	0.78399	11.8691	50	1	1	1	1	1
210	Female	Regular Work Hours	>60	17.759	9	6.00028	21.7283	15.7281	8.63939	20.0146	3.29467	2.05817	11.3752	30.6452	19	34	9	18	28
211	Female	Flexible Schedule	40-60	14.7167	6	9.36667	20.66	11.2933	10.4187	20.4912	1.91369	2.10515	10.0725	16	38	64	14	30	48
212	Male	Flexible Schedule	<40	15.4833	7	6.61667	21.7083	15.0917	8.34516	20.5436	2.37516	2.64573	12.1984	28.3688	27	42	6	15	27
213	Male	Long Work Hours	>60	13.2543	3	6.34158	21.3995	15.0579	7.19815	19.9771	0.844563	1.80714	12.779	14.9351	46	71	14	30	52
214	Female	Regular Work Hours	40-60	15	7	7.40583	20.6892	13.2833	8.3678	19.5972	1.31893	1.94152	11.2294	17.8947	21	31	4	12	20
215	Male	Long Work Hours	40-60	13.1667	3	7.8615	18.0909	10.2294	8.46018	17.7483	1.34867	1.99998	9.2881	7.6555	47	73	13	27	51
216	Female	Regular Work Hours	40-60	12.925	2	7.41083	20.3294	12.9185	7.76028	19.7581	0.452242	1.57179	11.9978	8.65385	63	80	13	30	52
217	Female	Flexible Schedule	40-60	12.55	1	9.51667	18.0371	8.52042	9.7881	17.8224	0.443373	0.434306	8.03435	22.6519	57	87	15	34	64
218	Male	Regular Work Hours	<40	13.2511	3	8.26258	20.4617	12.1991	9.00389	20.1131	1.18032	0.74881	11.1092	25.3731	1	2	1	1	1
219	Male	Regular Work Hours	40-60	12.3229	1	7.5	19.8422	12.3422	8.63433	18.0597	1.02819	2.27722	9.42537	27.027	20	36	5	16	27
220	Female	Regular Work Hours	40-60	13.5961	4	7.41792	20.7683	13.3503	8.23343	18.9182	1.44175	1.19381	10.6847	18.6567	59	78	16	35	61
221	Female	Flexible Schedule	40-60	11.5833	0	7.22817	18.25	11.0218	8.174	17.5087	1.06615	1.05504	9.33472	48.7179
222	Male	Regular Work Hours	40-60	12.6333	1	7.22833	23.4252	16.1969	8.07232	19.565	1.19095	2.59286	11.4927	21.875	12	33	3	10	21
223	Female	Regular Work Hours	>60	16.7128	9	9.98833	20.5853	10.5969	10.5986	20.206	1.19603	1.24377	9.6074	12.7517	25	39	7	14	25
224	Male	Long Work Hours	<40	13.0175	2	9.905	19.313	9.408	10.3858	18.2312	0.608833	0.526917	7.84539	32.4324
225	Male	Flexible Schedule	<40	18.5	9	10	21.35	11.35	10.7692	19.75	1.15385	1.05904	8.98077	59.2593	1	1	1	1	1
226	Female	Flexible Schedule	40-60	14.6475	6	9.94083	20.2806	10.3397	10.8287	19.2216	1.0944	0.648413	8.39286	24.5902	27	34	7	12	20
227	Female	Flexible Schedule	<40	13.5833	4	5.69242	17.7757	12.0833	6.8837	16.8847	1.86821	1.45722	10.001	32	34	49	7	21	38
228	Female	Flexible Schedule	40-60	15.0004	7	7.48302	20.4964	13.0134	9.05033	19.4482	1.7375	2.32396	10.3978	35.9375	29	42	7	18	33
229	Female	Regular Work Hours	>60	13.6047	4	7.71915	22.1225	14.4034	9.41764	20.767	2.02885	1.25976	11.3494	38.961	49	72	10	29	53
230	Male	Regular Work Hours	40-60	13.0308	2	6.88933	22.2557	15.3664	7.47105	20.6524	1.05917	2.51643	13.1813	30.137	13	18	2	6	12
231	Male	Regular Work Hours	>60	12.7667	2	7.15083	19.1667	12.0158	8.1119	19.022	1.16099	0.62621	10.9101	20.4724	23	37	8	16	26
232	Female	Flexible Schedule	40-60	14	5	8.65	21.425	12.775	9.96154	19.3846	0.628205	1.80169	9.42308	27.6596	1	2	1	2	2
233	Female	Regular Work Hours	40-60	12.7833	2	7.77844	22.78	15.0016	8.28175	21.0793	0.68906	1.5897	12.7976	18.0952	32	49	9	20	36
234	Female	Flexible Schedule	>60	13	2	8.71125	18.8382	10.127	9.03374	18.2784	0.423013	1.75842	9.2447	27.7778	24	38	6	15	26
235	Female	Regular Work Hours	40-60	14.01	5	10.3915	20.1007	9.70919	10.9225	19.1014	1.01301	1.13513	8.17887	20.7792	21	30	6	14	23
236	Female	Long Work Hours	<40	16.0131	8	6.53647	22.094	15.5575	10.5672	21.3791	2.93946	0.861825	10.8119	30.1887	15	19	5	10	15
237	Female	Flexible Schedule	<40	14	5	11	19.5608	8.56083	10.9747	19.1678	0.587399	0.81154	8.19306	10.6383	9	14	3	5	8
238	Male	Long Work Hours	40-60	13.2417	3	9.78917	19.9857	10.1965	11.5742	19.0045	1.31818	1.70129	7.43025	30.9524	6	7	2	4	5
239	Female	Flexible Schedule	40-60	15.05	7	9.37156	22.1436	12.772	11.1484	20.0645	1.48462	2.55884	8.91611	28.0899	19	23	6	10	15
240	Male	Regular Work Hours	40-60	12.9833	2	8.75986	21.1317	12.3718	9.48147	19.2012	0.884782	1.42889	9.71972	15.7407	25	31	7	14	22
241	Female	Regular Work Hours	<40	14.0364	5	7.22131	21.0012	13.7799	8.52588	19.234	1.56474	2.12483	10.7081	24.3243	33	39	10	20	30
242	Male	Flexible Schedule	40-60	12.6333	1	6.76962	21.1746	14.405	7.57052	18.8461	0.593373	2.04115	11.2756	17.8082	35	58	9	23	41
243	Male	Flexible Schedule	40-60	15.6	8	7.73333	21.65	13.9167	8.96997	20.2474	2.45662	1.25066	11.2774	28.8462	44	57	14	27	40
244	Female	Flexible Schedule	<40	14.85	7	7.5	23.2939	15.7939	8.30849	21.6329	0.779762	1.43171	13.3244	25.8065	50	71	15	32	56
245	Female	Long Work Hours	<40	13.0333	2	7.36164	19.3833	12.0217	8.42047	18.5179	0.775726	1.1359	10.0975	26.4151	21	26	6	11	18
246	Female	Regular Work Hours	40-60	17.4757	9	7.48659	21.1281	13.6415	8.18107	20.4683	1.39444	1.60073	12.2872	12.5	64	111	23	51	86
247	Male	Regular Work Hours	40-60	14.445	6	7.11944	22.446	15.3266	7.97823	19.4982	1.18849	2.33454	11.52	43.1034	13	14	4	7	9
248	Female	Regular Work Hours	40-60	12.8333	2	9	18.5	9.5	9.37949	17.8577	0.65	0.923077	8.47825	21.374	29	35	8	13	20
249	Male	Rotating Shift	40-60	17.3667	9	10.6245	24.5678	13.9433	12.3694	23.409	1.63611	1.79321	11.0396	29.5652	21	42	3	13	30
250	Female	Regular Work Hours	40-60	16.9167	9	8.90783	21.5792	12.6713	8.87462	19.6854	1.73265	1.7662	10.8108	10.4167	46	75	15	33	52
251	Female	Long Work Hours	40-60	13.3344	3	8.45576	18.4717	10.0159	8.55863	18.0714	0.229187	0.719702	9.51274	34.7368	25	32	6	13	21
252	Female	Regular Work Hours	<40	11.8833	0	7.66428	19.2369	11.5727	8.72821	18.5098	1.7572	1.5185	9.7816	25	40	54	11	23	38
253	Female	Regular Work Hours	40-60	12	0	7.75	19.6667	11.9167	8.86629	19.4932	0.875	1.15188	10.6269	21.8638	72	90	16	36	60
254	Male	Regular Work Hours	<40	15.7	8	7.83333	23.1072	15.2738	8.94472	21.7631	1.4403	1.97705	12.8183	20.339	40	69	12	28	47
255	Female	Morning Shift	<40	9.76667	0	6.58222	20.2417	13.6594	8.16808	17.3812	1.24601	1.95581	9.21308	17.6471	22	36	8	19	29
256	Female	Regular Work Hours	<40	12.5833	1	7.44616	19.5154	12.0693	7.88785	18.2106	1.38465	1.20434	10.3228	24.1935	57	77	17	41	63
257	Female	Flexible Schedule	>60	15.3667	7	10.6739	20.425	9.75114	11.0319	18.947	1.25543	1.51346	7.91513	21.8045	26	40	8	17	26
258	Female	Regular Work Hours	40-60	12.5356	1	8.6346	18.9816	10.347	9.42532	17.9687	0.643974	1.58346	8.54335	32.7273	20	35	6	17	28
259	Female	Regular Work Hours	<40	12.3333	1	8.29704	20.7125	12.4155	8.93464	19.6119	0.736603	1.2122	10.6773	31.9149
260	Male	Regular Work Hours	40-60	15.5	7	8.7	21.4375	12.7375	11.1347	20.5605	2.69583	0.689861	9.42574	12.7907	24	46	9	22	37
261	Female	Regular Work Hours	40-60	14.2333	5	9.56667	20.7667	11.2	10.2037	19.6927	0.876366	2.04574	9.489	22.0859	40	57	12	27	41
262	Male	Flexible Schedule	<40	14.1667	5	8.5	23.0167	14.5167	10.15	19.8756	1.65699	1.67671	9.72562	27.1429	14	17	4	8	11
263	Female	Rotating Shift	<40	12.6396	1	8.5	20.6667	12.1667	9.47594	18.5234	1.37167	2.7005	9.04747	37.1212	25	46	10	21	33
264	Female	Flexible Schedule	40-60	13.2	3	7.58343	19.6742	12.0907	9.1331	18.2138	1.01121	1.28292	9.08075	23.5772	47	68	13	31	54
265	Male	Flexible Schedule	<40	14.8833	7	6.89458	19.7814	12.8868	8.69788	19.1104	2.00096	1.49327	10.4125	30	12	14	4	6	10
266	Female	Regular Work Hours	<40	13.5511	4	7.85164	21.8644	14.0128	8.88942	18.1264	0.99803	3.78641	9.23694	28.3019	8	12	2	3	7
267	Male	Regular Work Hours	<40	14.65	6	7.13833	22.125	14.9866	7.53673	21.4112	0.691647	1.75389	13.8745	13.8211	36	52	7	18	36
268	Female	Regular Work Hours	40-60	14.2258	5	10	18.3596	8.35958	10.4017	17.6495	0.681136	0.544949	7.2478	34.6939	22	36	9	17	26
269	Female	Regular Work Hours	<40	14.0444	5	8.88083	23.44	14.5592	9.72617	19.76	0.677333	1.59578	10.0338	31.4286	3	4	2	3	4
270	Female	Flexible Schedule	40-60	13.65	4	7.53667	21.8183	14.2817	8.55303	19.9091	1.15	2.02424	11.3561	33.3333	21	30	5	12	19
271	Female	Regular Work Hours	<40	13.7644	4	9.33417	20.6817	11.3475	9.93609	19.9044	0.887176	1.69762	9.96833	25.2101	31	50	10	23	37
272	Male	Long Work Hours	40-60	14.1969	5	7.9465	20.3078	12.3613	9.95089	19.0885	2.59108	1.76153	9.13758	21.2766	6	6	1	3	5
273	Female	Flexible Schedule	<40	15.4333	7	8.86667	22.15	13.2833	10.9939	19.5136	2.01987	1.77879	8.5197	26.7327	52	65	11	28	48
274	Male	Flexible Schedule	<40	13.0133	2	8.19871	21.1806	12.9819	8.79456	20.8425	0.672245	1.5741	12.0479	16.5217	24	31	7	12	20
275	Female	Morning Shift	40-60	12.7167	2	5.84875	20.0012	14.1525	6.72024	18.0155	1.29831	1.99407	11.2952	27.9661	24	34	5	12	21
276	Female	Regular Work Hours	<40	14.0042	5	8.75	20.4275	11.6775	9.88333	19.8308	1.02564	1.26282	9.94744	19.1304	40	55	8	21	35
277	Female	Flexible Schedule	<40	13.4333	3	6.63542	21.2479	14.6125	7.14762	20.5393	1.37738	2.17738	13.3917	12.6984	59	83	13	30	50
278	Female	Flexible Schedule	40-60	16.7732	9	10.4191	23.6399	13.2208	13.0064	22.0377	2.17972	2.23133	9.03136	28.3333	20	28	6	13	20
279	Male	Flexible Schedule	40-60	12.7833	2	6.49212	19.65	13.1579	8.46064	18.6161	2.36534	1.60534	10.1554	40	20	33	7	15	25
280	Female	Flexible Schedule	<40	18.1167	9	12.8958	24.8667	11.9708	13.8394	22.4485	2.28182	2.37879	8.60909	25	19	26	3	10	20
281	Female	Flexible Schedule	<40	14.6667	6	9.145	22.225	13.08	9.86502	20.9375	1.02962	1.45735	11.0725	24.7059	19	31	5	12	23
282	Female	Long Work Hours	40-60	13.8167	4	8.1875	19.3	11.1125	8.93097	17.465	1.62391	2.54801	8.53405	15.3153	23	34	8	15	24
283	Female	Flexible Schedule	40-60	11.7167	0	6.92917	20.4125	13.4833	7.73452	18.1396	1.06069	1.36927	10.4051	30.3665	48	73	13	33	53
284	Male	Flexible Schedule	40-60	14.1492	5	9.74151	19.3316	9.59004	9.85462	18.8438	0.517906	0.998611	8.98915	6.41711	33	44	10	20	29
285	Female	Regular Work Hours	40-60	14.7114	6	9.93792	21.7787	11.8408	11.7131	19.9322	2.10051	2.02259	8.21905	26.087	39	60	12	33	50
286	Male	Regular Work Hours	<40	12.9	2	6.01111	21.476	15.4649	6.53734	20.5516	1.18417	1.62935	14.0143	16.3121	13	15	4	7	9
287	Female	Flexible Schedule	40-60	13.3333	3	7.00887	22.7842	15.7754	8.34674	19.2893	1.13569	2.6128	10.9425	22.8916	24	38	8	15	29
288	Female	Flexible Schedule	40-60	13.8008	4	9.62988	21.5944	11.9645	9.63619	21.2175	0.681607	0.813294	11.5813	5.73477	44	74	14	27	48
289	Female	Flexible Schedule	40-60	15.5	7	8.70667	23.6019	14.8952	10.2296	20.3147	2.72928	1.58164	10.0851	18.3673	6	8	3	4	7
290	Male	Regular Work Hours	40-60	13.6153	4	9.3865	22.5	13.1135	10.6426	20.8994	2.00508	1.74104	10.2567	39.7059	25	38	10	19	30
291	Female	Long Work Hours	<40	18.0047	9	8.26	24.275	16.015	9.73241	21.0999	1.75912	2.27125	11.3675	30	22	37	3	9	23
292	Male	Flexible Schedule	>60	14.4417	6	9.91667	18.1029	8.18625	9.43911	18.0246	1.97944	0.292857	8.58546	6.41026	68	88	17	40	64
293	Male	Regular Work Hours	40-60	13.1836	3	8.01611	19.5307	11.5146	9.16643	17.7152	1.5284	1.09756	8.54874	20.1835	52	77	13	33	54
294	Male	Long Work Hours	<40	13	2	7.66667	23.7222	16.0556	8.64762	21.6951	1.77554	2.82583	13.0475	24.031	22	27	5	9	15
295	Female	Flexible Schedule	<40	18.1	9	9.25861	24.8858	15.6272	11.9212	23.5863	3.37877	1.87188	11.6651	33.8983	14	18	6	10	14
296	Male	Regular Work Hours	<40	15.0857	7	8.60254	20.3354	11.7328	10.1783	18.9868	2.26679	2.10692	8.80844	34.2593	24	38	5	15	28
297	Male	Regular Work Hours	40-60	12.8833	2	8.405	21.1328	12.7278	9.20836	19.7808	0.431111	0.842803	10.5724	17.7419	22	33	7	15	25
298	Female	Regular Work Hours	40-60	13.1917	3	6.53375	20.1238	13.59	7.15339	18.2756	1.0096	2.55127	11.1222	21.1538	41	60	8	22	44
299	Female	Flexible Schedule	<40	19.2167	9	11.2475	22.8967	11.6492	11.9394	22.5929	1.0681	0.607143	10.6535	12.3188	81	112	18	40	67
300	Male	Regular Work Hours	40-60	12.8667	2	9.305	18.9471	9.64208	9.29487	18.781	0.771795	2.47744	9.48615	6.79012	26	30	5	10	18
301	Female	Flexible Schedule	<40	12.4022	1	8.46667	22.0065	13.5398	9.09571	20.9567	0.714872	1.33835	11.861	44.9438	17	19	4	6	12
302	Male	Rotating Shift	<40	15.7833	8	5.75	26.1625	20.4125	8.9796	20.7762	2.09024	1.38446	11.7966	22.5225	19	27	6	11	18
303	Female	Long Work Hours	40-60	16.0637	8	9.49882	21.3833	11.8845	10.125	19.8129	1.18071	1.52712	9.68788	16.5217	44	69	11	26	42
304	Female	Flexible Schedule	40-60	15.0833	7	8.2025	22.1401	13.9376	9.35325	20.9121	1.65556	1.89565	11.5588	17.5926	27	41	7	16	30
305	Male	Flexible Schedule	40-60	11.8544	0	6.81917	19.6735	12.8543	8.32452	18.9896	1.45234	1.53169	10.6651	39.5604	17	23	4	8	15
306	Male	Flexible Schedule	<40	12.6972	2	6.66243	20.5984	13.936	8.22615	17.6379	1.14457	2.19216	9.41177	31.3725	3	8	2	5	7
307	Female	Flexible Schedule	<40	18.4164	9	10.0114	25.2622	15.2508	11.0252	21.8628	2.49769	3.54765	10.8376	25.4545	33	50	9	23	39
308	Female	Flexible Schedule	>60	11.8333	0	7.7	17.8692	10.1692	8.62424	16.6394	1.53636	2.03182	8.01515	27.8302	65	94	20	44	72
309	Male	Flexible Schedule	<40	12.8333	2	7.4125	19.3592	11.9467	8.47738	17.0833	0.833333	1.71786	8.60595	22.0588	14	21	4	8	13
310	Male	Regular Work Hours	<40	13.4	3	7.7	19.3333	11.6333	10.2819	18.3181	1.9625	2.04722	8.03611	43.4783	14	24	5	8	14
311	Male	Flexible Schedule	<40	13.2833	3	7.77	21.5033	13.7333	10.3488	19.5321	2.14524	2.91071	9.18333	28.6624	17	18	5	9	13
312	Male	Long Work Hours	<40	13.4333	3	7.88	19.2228	11.3428	9.595	18.265	2.33194	0.798135	8.67002	22.6667	32	51	8	22	40
313	Male	Flexible Schedule	<40	15.55	8	9.09015	23.4219	14.3318	9.91182	21.6815	1.21927	2.36254	11.7697	34.5324	19	23	5	8	14
314	Female	Flexible Schedule	40-60	13.45	3	8.2575	22.4713	14.2137	9.02315	20.1524	1.05204	2.00835	11.1292	23.6364	34	52	10	22	40
315	Female	Long Work Hours	40-60	12.9833	2	7.66667	19.6031	11.9364	8.22206	18.6561	0.645397	2.02889	10.434	15.9184	82	125	26	58	96
316	Male	Regular Work Hours	<40	12.3167	1	7.27667	21.3467	14.07	7.82436	19.6538	0.885064	1.52179	11.8295	22.8571	7	8	2	3	5
317	Female	Flexible Schedule	40-60	14.2039	5	7.51365	21.3917	13.878	8.98068	19.03	1.88434	2.88829	10.0493	34.9206	38	65	17	41	56
318	Female	Rotating Shift	<40	14.8333	6	9.60889	21.4333	11.8244	9.74681	22.0125	1.91044	2.63525	12.2657	4.82234	77	80	18	37	55
319	Male	Regular Work Hours	<40	13.875	5	8.57906	20.0664	11.4873	9.48472	18.9714	1.43098	1.10538	9.48672	27.5	22	28	5	11	20
320	Female	Regular Work Hours	40-60	12.7	2	5.815	20.4769	14.6619	5.93	19.2042	0.857389	1.79289	13.2742	13.5714	59	83	14	34	59
321	Female	Regular Work Hours	40-60	14.9189	7	9.41933	19.4985	10.0792	10.3832	19.4604	1.32244	2.29333	9.07719	17.7778	11	13	3	6	8
322	Male	Morning Shift	<40	13.2333	3	6.82708	24.0684	17.2413	8.66765	19.1259	2.51923	1.9416	10.4583	36.8421	7	8	4	6	8
323	Female	Flexible Schedule	40-60	12.2583	1	6.71889	19.35	12.6311	9.32189	17.6933	1.24789	1.25036	8.37144	35.5932	16	22	5	9	14
324	Female	Flexible Schedule	<40	14.7299	6	8.60417	20.7945	12.1903	9.13636	20.1619	0.587273	0.87601	11.0255	26.8293	45	63	14	33	51
325	Female	Regular Work Hours	<40	13.7019	4	8.36833	20.1166	11.7483	9.14086	18.6261	1.62894	1.69883	9.48525	26.3158	22	25	4	9	14
326	Female	Long Work Hours	40-60	12.1347	1	7.22326	21.2414	14.0181	8.14342	20.3426	1.27449	1.66466	12.1992	24.3243	31	53	7	20	40
327	Female	Regular Work Hours	<40	16.3736	8	7.1034	21.995	14.8916	9.16907	20.2651	1.60545	2.16909	11.0961	35.2113	21	47	13	26	39
328	Female	Flexible Schedule	40-60	13	2	6.75625	19.9368	13.1805	8.67121	19.3112	1.38636	0.602626	10.6399	33.3333	39	53	15	30	44
329	Female	Rotating Shift	<40	17.0167	9	10.8075	23.2	12.3925	11.3826	21.2179	1.28488	1.78929	9.8353	15.8416	56	78	13	32	54
330	Female	Regular Work Hours	40-60	13.6667	4	7.41167	21.0426	13.6309	9.04231	20.2379	1.72692	1.2353	11.1956	19.1304	35	52	11	24	40
331	Female	Flexible Schedule	40-60	15.875	8	6.78458	22.15	15.3654	7.33605	20.5351	1.29526	3.10577	13.199	8.70968	64	84	15	33	53
332	Female	Flexible Schedule	40-60	15.9083	8	9.05458	20.8167	11.7621	9.93577	19.8743	1.77868	1.87436	9.93848	16.6667	48	73	11	30	56
333	Female	Flexible Schedule	40-60	15.0189	7	8.3	21.1894	12.8894	8.86162	19.1049	0.687854	2.08237	10.2433	24.6154	31	34	7	15	24
334	Female	Long Work Hours	40-60	13.8333	4	7.22167	21.9309	14.7093	8.81159	19.572	1.86796	1.90282	10.7604	19.3548	43	76	18	42	63
335	Male	Regular Work Hours	<40	13.7274	4	7.28631	19.8573	12.571	10.9443	19.0193	1.72378	0.606528	8.07494	27.2727	18	27	6	14	22
336	Male	Flexible Schedule	>60	10.8667	0	5.1375	18.0833	12.9458	6.30238	17.8202	1.68333	0.338988	11.5179	20.6107	33	53	10	24	38
337	Female	Long Work Hours	<40	14.7833	6	10.0025	21.9	11.8975	11.0838	20.2556	1.17056	1.11806	9.17176	37.0787	40	53	13	26	41
338	Male	Flexible Schedule	<40	15.3667	7	8.35	19.4	11.05	8.51931	19.2905	0.696429	0.863095	10.7712	9.31507	89	117	18	43	76
339	Female	Flexible Schedule	40-60	12.8167	2	7.03292	20.0624	13.0294	8.06403	18.7401	1.32738	1.78496	10.6761	32.6241	31	46	10	22	34
340	Female	Regular Work Hours	40-60	13.8667	4	6.49333	21.0683	14.575	7.47857	19.9292	0.714286	1.14111	12.4506	21.519	7	7	2	3	4
341	Male	Regular Work Hours	>60	12.779	2	9.7125	19.1226	9.41007	11.3848	17.9323	1.46553	1.47343	6.54747	33.3333	13	19	4	8	12
342	Female	Flexible Schedule	40-60	15.45	7	8.69375	20.8567	12.163	9.7103	20.6243	1.62796	0.557698	10.914	16.9643	34	53	9	22	37
343	Female	Flexible Schedule	>60	12.5667	1	9.035	20.0233	10.9883	9.27074	18.8697	0.887454	2.10009	9.59896	15.7895	44	82	16	42	66
344	Male	Flexible Schedule	40-60	12.45	1	9.475	18.9039	9.42889	8.88585	17.3525	2.46932	1.3397	8.46669	10.0372	74	94	19	41	65
345	Male	Flexible Schedule	40-60	17.0583	9	7.83375	25.6167	17.7829	10.9626	23.62	4.04296	3.48171	12.6574	25.4902	8	10	1	3	5
346	Male	Long Work Hours	>60	14.25	5	7.5814	20.9333	13.3519	8.68593	18.6636	1.12913	2.49194	9.97764	35.0877	42	71	16	36	57
347	Female	Flexible Schedule	40-60	11.8333	0	8.02	19.4183	11.3983	8.57855	17.4218	0.680913	1.64718	8.84325	17.2932	49	65	10	24	45
348	Male	Long Work Hours	>60	13.0889	3	7.15125	21.4661	14.3148	7.96803	19.4685	1.22889	2.06652	11.5005	23.1707	18	29	5	11	21
349	Male	Regular Work Hours	40-60	12.8789	2	5.54999	20.1316	14.5816	6.90736	19.4807	2.52225	2.58761	12.5733	16.9014	38	51	10	23	37
350	Female	Regular Work Hours	<40	11.5167	0	7.3	19.2308	11.9308	8.36026	17.9013	1.82707	1.90408	9.54103	29.8851	13	21	4	8	14
351	Female	Regular Work Hours	<40	12.2606	1	7.91667	24.0118	16.0951	8.51414	19.3658	1.18208	2.06449	10.8516	23.7037	39	61	13	28	45
352	Male	Flexible Schedule	40-60	14.4	6	7.96625	21.2919	13.3257	8.9112	19.2678	1.06085	1.04744	10.3566	29.5918	25	50	9	22	36
353	Male	Long Work Hours	40-60	13.3567	3	6.22112	21.7113	15.4902	6.61687	20.1491	0.690337	1.98294	13.5323	16.7832	27	42	4	13	26
354	Male	Flexible Schedule	<40	14.95	7	9.10417	21.35	12.2458	10.2897	20.3412	1.74938	1.28625	10.0515	32.967	22	42	11	22	33
355	Female	Regular Work Hours	40-60	9.25833	0	5.38333	24.0406	18.6572	5.87143	20.3	0.677817	3.95802	14.4286	39.8693	34	45	9	19	29
356	Female	Regular Work Hours	40-60	15.0417	7	5.9796	21.3105	15.3309	7.41829	20.9072	1.84996	1.80853	13.4889	14.3939	32	54	7	22	39
357	Male	Flexible Schedule	<40	13.1333	3	7.1825	22.2045	15.022	8.38772	19.6974	2.22878	3.1365	11.3097	61.5385	13	17	2	8	14
358	Male	Long Work Hours	40-60	13.7703	4	6.37006	20.6845	14.3145	6.7691	19.8358	0.530278	1.66444	13.0667	10.1562	56	93	22	46	71
359	Female	Regular Work Hours	<40	12.75	2	5.78348	20.368	14.5845	6.80705	18.2056	1.30936	2.32765	11.3986	36.5385	15	23	5	10	15
360	Female	Regular Work Hours	40-60	13.0544	2	7.51333	21.7337	14.2203	8.2847	20.4219	0.893141	2.36226	12.1372	23.0159	23	52	9	23	39
361	Male	Regular Work Hours	<40	14.5094	6	7.74078	23.35	15.6092	10.5869	20.1418	2.42762	2.61722	9.55495	36.8421	26	42	12	22	34
362	Male	Rotating Shift	<40	13.5167	4	8.67583	23.225	14.5492	9.45869	20.906	0.971212	3.19025	11.4473	16	28	34	5	11	21
363	Male	Long Work Hours	<40	13.5667	4	5.82217	20.3167	14.4945	6.93262	18.7943	1.59759	2.29454	11.8617	44.9275	37	52	11	26	42
364	Female	Flexible Schedule	>60	12.8322	2	7.2759	19.6562	12.3803	7.51464	18.7402	0.575794	1.55698	11.2256	27.8146	50	72	10	28	51
365	Female	Flexible Schedule	<40	14.2333	5	10.1117	19.4221	9.31047	10.8548	18.5359	0.775093	1.84509	7.68113	29.2929	41	71	16	42	60
366	Female	Regular Work Hours	<40	14.05	5	8.5025	19.0333	10.5308	8.91667	18.2128	1.16795	0.912821	9.29615	14.8649	50	78	16	35	60
367	Female	Flexible Schedule	>60	11.035	0	7.3316	18.9435	11.6119	8.20313	17.4707	0.95746	1.70911	9.26756	33.8028	42	63	12	34	52
368	Unknown	Long Work Hours	<40	13.6133	4	8.0056	22.1796	14.174	8.87803	20.3982	0.724124	2.11831	11.5202	18.3673	38	54	11	25	39
369	Male	Flexible Schedule	40-60	14.9244	7	9.76156	21.9249	12.1633	10.0466	19.4205	0.851889	1.41283	9.37394	18	14	17	5	8	12
370	Female	Regular Work Hours	<40	13.05	2	7.06833	20.875	13.8067	7.93333	19.3705	0.98062	1.45128	11.4372	24.2718	32	46	8	19	35
371	Female	Flexible Schedule	40-60	12.6667	1	7.28333	19.5128	12.2294	7.69011	18.3009	0.651068	0.756538	10.6108	11.0497	60	103	26	53	82
372	Female	Flexible Schedule	<40	14.7	6	8.41042	23.3917	14.9812	10.6891	23.4361	1.79429	1.95579	12.747	19.9234	39	54	9	19	32
373	Female	Regular Work Hours	<40	13.5817	4	9.31692	22.2346	12.9177	10.5337	18.8324	1.18819	2.63023	8.29875	26.9231	5	16	3	7	13
374	Female	Flexible Schedule	40-60	13.1722	3	8.50411	21.0044	12.5003	9.93447	20.2567	1.30539	1.34422	10.3222	35.6522	37	57	11	25	42
375	Female	Flexible Schedule	40-60	14.95	7	8.27111	22.1342	13.8631	12.0987	19.4233	1.94672	1.65606	7.3246	33.0709	47	76	19	40	62
376	Female	Regular Work Hours	40-60	15.4833	7	6.25576	20.6389	14.3831	7.01448	19.7079	0.932917	2.39369	12.6934	12.3457	49	84	12	33	57
377	Female	Regular Work Hours	40-60	18.1667	9	9.21482	19.6707	10.4559	12.4833	18.8504	0.813972	0.499278	6.36711	33.3333	19	32	10	18	27
378	Male	Evening Shift	40-60	11.9333	0	5.68	21.9	16.22	9.13126	18.8827	1.42407	1.57677	9.75146	13.1274	44	62	12	23	38
379	Male	Flexible Schedule	40-60	16.4333	8	7.52251	24.1869	16.6643	9.72567	21.4505	2.46914	2.08157	11.7248	22.8916	26	39	9	19	30
380	Male	Regular Work Hours	40-60	13.45	3	8.12875	20.0592	11.9304	8.57472	19.4436	0.651239	1.60385	10.8689	23.6364	22	25	4	9	16
381	Female	Regular Work Hours	40-60	17.9833	9	5.54167	24.5217	18.98	8.51	22.1433	4.43	3.04833	13.6333	27.0588	22	42	9	19	30
382	Female	Regular Work Hours	40-60	12.7167	2	7.00656	18.9478	11.9412	7.55737	17.642	1.09363	1.46979	10.0847	17.8295	52	71	13	30	52
383	Female	Regular Work Hours	<40	14.0667	5	6.17654	21.9279	15.7514	6.89698	21.1469	0.775317	1.27091	14.2499	22.3301	22	28	4	11	19
384	Female	Regular Work Hours	>60	14.1167	5	7.32333	22.38	15.0567	9.09194	19.2489	2.28351	3.09497	10.1569	22.6804	45	81	23	52	70
385	Female	Regular Work Hours	<40	13.4667	3	7.76639	21.7734	14.007	9.659	20.5223	2.0675	1.88729	10.8633	33.3333	25	36	7	17	29
386	Female	Flexible Schedule	40-60	19.8167	9	10.0458	25.2903	15.2444	10.8692	23.4894	2.09212	2.19871	12.6202	18.543	39	61	10	24	41
387	Male	Long Work Hours	40-60	11.8299	0	8.12899	20.027	11.898	8.76823	19.3082	1.47446	2.11312	10.5399	18.9394	29	39	7	17	27
388	Male	Flexible Schedule	<40	12.2167	1	9.085	16.905	7.82	9.21364	16.0993	0.287753	1.22455	6.88566	32	21	29	4	12	21
389	Female	Flexible Schedule	<40	14.4214	6	8.71625	23.035	14.3187	9.48813	21.45	0.808704	1.70185	11.9619	22.1591	38	54	8	19	36
390	Female	Flexible Schedule	<40	11.4333	0	8.3	20.3883	12.0883	9.10763	19.3751	0.868333	1.15154	10.2675	34.8387	33	50	10	22	34
391	Male	Regular Work Hours	<40	15.6167	8	8.84717	22.8333	13.9862	10.4409	20.9446	1.85403	1.73634	10.5037	26.3158	9	13	2	5	8
392	Male	Flexible Schedule	>60	13.5667	4	7.15341	18.8853	11.7319	8.99627	18.0594	1.24633	1.37673	9.06313	29.5918	40	62	13	28	49
393	Female	Morning Shift	<40	12.9333	2	4.05375	20.2425	16.1887	5.14929	20.4818	1.83784	3.32637	15.3325	16.6667	6	7	2	3	4
394	Female	Morning Shift	40-60	11.0583	0	6.31806	21.4088	15.0907	7.30606	19.2091	1.66846	2.53369	11.903	26.6667	21	28	3	8	20
395	Female	Flexible Schedule	40-60	13.4131	3	6.56354	21.3852	14.8217	8.40748	19.2416	1.61701	2.46735	10.8341	43.1373	17	21	4	9	15
396	Male	Regular Work Hours	40-60	14.9192	7	8.6586	22.3283	13.6697	9.61615	21.2035	1.192	1.985	11.5873	17.0068	30	53	6	17	32
397	Female	Regular Work Hours	40-60	13.5167	4	8.26667	20.4269	12.1603	8.21397	19.9543	0.692857	1.65635	11.7404	8.71369	59	100	13	39	75
398	Male	Flexible Schedule	40-60	15.7608	8	10.5128	22.0078	11.495	11.3161	19.8827	1.22091	2.70336	8.56654	29.386	32	45	10	20	30
399	Female	Rotating Shift	<40	13.2086	3	7.77608	19.8178	12.0417	9.20625	18.591	1.86593	1.44577	9.38478	21.6667	25	29	4	11	20
400	Male	Regular Work Hours	40-60	13.981	5	7.56489	18.1846	10.6197	9.5373	17.5809	1.87806	0.822348	8.04359	50	14	24	7	13	19
401	Female	Flexible Schedule	40-60	12.9914	2	8.24375	20.21	11.9663	9.12024	19.4761	1.14321	1.78304	10.3558	19.7368	42	75	16	35	56
402	Female	Long Work Hours	40-60	11.4417	0	4.09217	21.2963	17.2041	7.67833	19.9034	1.99709	2.66632	12.2251	16.6667	23	30	6	13	22
403	Male	Flexible Schedule	40-60	13.0511	2	7.13875	22.5084	15.3696	7.81296	19.8535	0.725516	2.923	12.0406	23.5294	28	48	5	14	33
404	Female	Regular Work Hours	<40	12.25	1	8.68292	18.9279	10.245	8.9	18.409	0.739744	0.864295	9.50897	27.5862	42	64	17	33	47
405	Female	Regular Work Hours	<40	13.465	3	7.96667	20.9026	12.9359	9.28647	19.8461	1.30319	1.20325	10.5596	33.8462	5	5	1	2	3
406	Female	Regular Work Hours	<40	13.6667	4	9.15306	22.1378	12.9847	10.1225	18.2757	1.21414	3.67977	8.15322	21.0046	47	57	12	25	39
407	Male	Flexible Schedule	<40	12.1667	1	6.93333	18.9683	12.035	8.21208	17.8698	1.01426	1.25843	9.65775	40.4762	18	23	5	10	15
408	Male	Regular Work Hours	<40	12.5428	1	7.7719	18.9846	11.2127	8.41218	17.8684	0.817183	1.65528	9.45619	35.5932	15	21	4	8	15
409	Female	Regular Work Hours	40-60	15.0794	7	6.62668	20.7732	14.1465	8.50282	19.8931	3.16847	1.59226	11.3902	18.6992	57	86	21	50	72
410	Female	Regular Work Hours	<40	13.875	5	9.01667	21.3851	12.3685	9.9394	20.1198	1.20063	1.38028	10.1804	29.3478	28	46	12	23	36
411	Male	Regular Work Hours	40-60	14.5	6	8.9585	23.6212	14.6627	9.12104	21.3662	1.05096	3.08098	12.2451	14.6789	25	41	7	15	28
412	Male	Regular Work Hours	<40	10.2167	0	5.06	18.5046	13.4446	6.64256	15.0965	1.62987	2.27417	8.45391	33.8462	11	16	3	6	11
413	Female	Regular Work Hours	<40	11.8417	0	8.08333	19.7667	11.6833	9.6141	18.6359	0.869231	1.59231	9.02179	29.5918	53	101	18	39	71
414	Female	Regular Work Hours	<40	15.1083	7	8.5	24.4222	15.9222	10.6223	20.7623	1.38472	1.47968	10.1399	31.1688	28	41	6	13	24
415	Male	Flexible Schedule	<40	13.0083	2	5.60583	19.4567	13.8508	6.46282	17.9513	0.775171	1.52821	11.4885	40	25	29	7	14	20
416	Female	Long Work Hours	<40	13.225	3	8.40442	20.0374	11.633	8.7752	18.7541	0.385556	1.18298	9.97893	23.6842	23	32	7	14	22
417	Male	Flexible Schedule	<40	15.0667	7	8.35	20.8944	12.5444	9.50436	19.8471	1.18628	1.69286	10.3427	31.7647	11	17	3	7	11
418	Male	Regular Work Hours	>60	15.3733	7	7.79565	23.1734	15.3777	8.65815	21.2525	1.13528	2.37367	12.5943	19.403	46	63	11	27	43
419	Female	Regular Work Hours	<40	13.3333	3	8.30667	19.8333	11.5267	11.4057	19.0717	1.66083	1.11375	7.666	22.2222	12	17	4	9	14
420	Female	Regular Work Hours	<40	17.0529	9	7.35953	24.05	16.6905	8.67105	21.7317	2.01119	1.44554	13.0606	29.2553	44	55	12	25	38
421	Male	Regular Work Hours	40-60	13.6	4	8.57898	21.5954	13.0164	9.72162	20.4115	1.47419	1.89904	10.6899	24	43	61	14	31	49
422	Male	Regular Work Hours	<40	13.4167	3	9.91667	19.1642	9.2475	10.4669	18.6599	0.686197	1.16735	8.19303	26.7206	57	74	15	31	49
423	Female	Flexible Schedule	40-60	12.475	1	6.73083	19.1821	12.4512	6.85897	17.5462	0.638462	1.68205	10.6872	12.3188	20	33	5	11	20
424	Female	Regular Work Hours	40-60	13.1	3	6.76063	19.5767	12.816	7.43546	19.0467	0.751296	0.646204	11.6112	21.3333	35	53	11	26	43
425	Male	Regular Work Hours	<40	12.5167	1	6.50035	19.6625	13.1622	6.81248	18.7098	1.01976	1.12044	11.8973	14.3836	27	30	3	9	19
426	Female	Night Shift	40-60	15.25	7	5.8925	27.15	21.2575	6.36041	21.5269	1.02705	2.46932	15.1665	17.3333	30	44	7	16	32
427	Male	Flexible Schedule	40-60	12.2833	1	7.93833	21.6001	13.6617	9.55576	20.3136	2.95697	2.49379	10.7579	24.6753	34	42	10	18	30
428	Female	Flexible Schedule	40-60	14.65	6	6.33333	24.1481	17.8147	8.72914	20.125	2.18472	2.72116	11.3959	39.7436	55	90	14	37	65
429	Female	Flexible Schedule	<40	14.7167	6	7.03333	23.1503	16.1169	8.7553	18.4139	2.60621	5.04689	9.65856	31.1475	5	7	2	5	6
430	Male	Flexible Schedule	<40	15.4167	7	11.3533	20.2862	8.93289	11.8086	19.0498	1.87051	1.19936	7.24118	19.1011	35	49	11	23	37
431	Female	Long Work Hours	40-60	13.0803	2	8.94765	18.5596	9.61193	8.93401	18.5044	0.913214	0.452679	9.57036	5.39773	68	86	9	27	51
432	Unknown	Flexible Schedule	<40	14.2067	5	6.24882	19.5035	13.2546	7.89442	17.846	1.4025	1.22308	9.95157	29.0909	7	8	2	3	5
433	Male	Flexible Schedule	40-60	14.9	7	12.6969	21.2025	8.50556	13.1708	20.657	1.88987	1.42889	7.48614	18.3673	30	51	10	21	35
434	Female	Flexible Schedule	40-60	8.15806	0	5.87003	19.6892	13.8192	7.15978	18.6708	0.759306	1.61302	11.511	47.7273	20	24	4	8	11
435	Female	Night Shift	40-60	12.3333	1	4.72417	21.15	16.4258	5.95167	17.5317	1.39167	4.70047	11.58	18.1818	19	35	5	14	26
436	Female	Regular Work Hours	40-60	11.5	0	7	18.5489	11.5489	7.51528	17.9846	0.937444	0.621611	10.4693	48.5714	9	13	2	5	9
437	Female	Flexible Schedule	40-60	15.6833	8	8.65333	21.6117	12.9583	10.4622	19.0519	2.51819	2.41338	8.58963	32.7273	16	34	6	14	26
438	Male	Regular Work Hours	40-60	13.1	3	4.86417	20.9289	16.0647	6.34363	18.4515	1.7337	1.89009	12.1079	36.2637	37	58	10	24	44
439	Female	Long Work Hours	<40	12.7667	2	7.00833	20.7875	13.7792	8.60201	17.9314	2.00177	2.5947	9.32936	28.4768	50	78	12	33	59
440	Female	Regular Work Hours	<40	12.375	1	5.39375	19.3208	13.9271	5.69933	18.0526	0.533333	1.74333	12.3533	22.3684	2	2	1	2	2
441	Female	Flexible Schedule	<40	19.1667	9	8.78125	26.3897	17.6084	16.555	24.1678	3.065	1.71061	7.61281	37.5	17	22	6	12	17
442	Male	Long Work Hours	40-60	12	0	7.34	19.1574	11.8174	8.26199	17.9811	1.42282	1.90421	9.71915	28.0899	30	44	6	16	33
443	Female	Flexible Schedule	<40	15.75	8	10.4083	21.15	10.7417	11.1758	20.7396	1.24419	3.35093	9.56384	10.5263	58	93	14	37	66
444	Male	Long Work Hours	<40	14.2	5	9.1	20.95	11.85	10.0364	19.9675	1.29091	1.22897	9.93101	28.6486	36	51	9	21	34
445	Female	Regular Work Hours	>60	12.5	1	6.5	21	14.5	9.04911	21.1438	1.61726	1.6852	12.0947	15.9533	79	118	21	50	86
446	Male	Flexible Schedule	>60	16.3667	8	7.68228	23.1071	15.4248	10.1111	20.5395	3.9606	2.30477	10.4284	33.3333	33	48	9	21	37
447	Female	Regular Work Hours	40-60	13.326	3	7.81167	20.1437	12.332	8.39058	19.6956	0.96544	1.33359	11.3051	16.6667	60	85	23	44	64
448	Male	Flexible Schedule	<40	12.475	1	10.0722	17.5138	7.44153	10.6701	17.1027	1.48211	1.41019	6.43261	30	31	52	12	24	37
449	Male	Regular Work Hours	40-60	12.3917	1	5.03792	19.0846	14.0467	5.50833	18.5214	0.890893	2.77619	13.0131	12.7907	34	41	8	16	25
450	Female	Regular Work Hours	<40	12.4167	1	6.56267	21.8291	15.2664	9.00063	18.5659	1.91089	2.7948	9.5653	20.6349	18	30	4	13	24
451	Female	Regular Work Hours	40-60	13.4167	3	7.31037	20.2958	12.9855	8.60597	19.8567	0.858194	1.08952	11.2507	21.4953	19	28	6	11	17
452	Male	Flexible Schedule	40-60	14.1492	5	10.35	17.9476	7.59761	10.7631	17.1194	0.646587	1.11028	6.35629	26.1538	27	39	10	19	31
453	Female	Flexible Schedule	>60	15.65	8	8.2	21.6867	13.4867	11.5947	19.3575	2.7035	2.91006	7.76275	36.8421	33	50	12	27	41
454	Female	Long Work Hours	40-60	15.5167	7	9.10711	23.2138	14.1067	10.0848	21.4944	1.41613	1.75716	11.4096	14.0704	77	107	23	51	81
455	Female	Flexible Schedule	40-60	12.1368	1	7.18333	19.6833	12.5	8.08333	17.8392	1.58641	3.01318	9.75588	36.4706	41	67	11	23	47
456	Female	Morning Shift	40-60	17.4719	9	6.19911	21.7632	15.5641	7.6678	20.1359	2.36245	2.12894	12.4681	29.0598	38	48	5	15	33
457	Female	Regular Work Hours	<40	14	5	6.74104	21.0178	14.2767	7.06038	20.5361	0.845317	0.656667	13.4757	16.2162	40	55	10	23	40
458	Female	Flexible Schedule	<40	14.5667	6	6.09893	21.5261	15.4272	7.00395	19.7703	1.23521	1.92692	12.7664	20	14	20	2	7	13
459	Male	Regular Work Hours	>60	10.7211	0	6.1179	19.1467	13.0288	7.00513	18.1935	0.894231	1.04801	11.1884	45.7143	28	38	6	17	30
460	Female	Flexible Schedule	40-60	13.1667	3	7.76667	16.8667	9.1	8.04387	16.2233	0.285357	0.894742	8.17944	41.844	28	30	6	12	20
461	Female	Long Work Hours	40-60	13.6889	4	8	19.9929	11.9929	8.88551	19.3135	1.01803	2.04547	10.428	25.5102	41	59	9	25	43
462	Male	Regular Work Hours	>60	14.2411	5	8.05864	20.7419	12.6832	8.65011	19.3618	1.34412	1.69868	10.7117	16	37	51	7	18	37
463	Female	Flexible Schedule	40-60	16	8	8.21267	20.5879	12.3752	8.39532	20.0787	0.428671	0.802718	11.6834	12.5	46	66	14	31	49
464	Female	Flexible Schedule	<40	14.0008	5	10.0667	20.5147	10.4481	10.7609	18.6818	1.01802	1.57292	7.92099	34.2007	59	94	16	38	66
465	Male	Regular Work Hours	40-60	14.3397	6	6.23422	20.8603	14.626	8.44141	18.5304	2.37917	2.17306	10.089	29.8701	17	37	5	14	28
466	Male	Regular Work Hours	<40	12.6333	1	6.98313	20.995	14.0119	7.6271	20.5738	0.521091	1.20817	12.9467	19.0217	35	49	9	20	31
467	Male	Regular Work Hours	40-60	10.2375	0	4.33333	18.7297	14.3964	5.27652	16.9893	2.01636	3.5497	11.7128	55.7377	14	20	3	7	13
468	Female	Morning Shift	40-60	21.1333	9	7.06667	23.2833	16.2167	10.2738	22.4517	4.66217	0.868333	12.1779	20.5882	19	30	8	14	20
469	Female	Flexible Schedule	40-60	13.6917	4	7.39875	22.1833	14.7846	8.25662	19.6605	1.20965	3.00843	11.4038	28.75	29	38	6	14	26
470	Female	Flexible Schedule	40-60	13.431	3	7.64414	20.9017	13.2575	7.59573	20.1683	1.12833	1.88298	12.5725	9.42623	57	81	12	33	56
471	Male	Regular Work Hours	>60	12.6833	2	6.55875	18.9696	12.4108	9.01701	17.7753	2.51319	2.00032	8.75826	43.5484	18	32	9	16	26
472	Female	Flexible Schedule	40-60	13.5	4	8.34976	18.6667	10.3169	8.99056	18.0167	0.78254	1.07159	9.02617	19.3548	57	71	14	29	49
473	Male	Regular Work Hours	40-60	14.2406	5	7.36283	21.1744	13.8116	8.53312	20.4353	1.08241	1.28237	11.9021	16.5217	33	40	8	17	28
474	Female	Flexible Schedule	<40	16.1351	8	9.51528	22.7633	13.2481	11.0981	21.3911	1.76002	2.16763	10.2931	28.75	66	92	17	39	71
475	Male	Flexible Schedule	<40	15.0769	7	11.696	20.1256	8.42961	12.5302	19.6251	0.433333	1.22833	7.09498	16.3043	33	48	10	22	36
476	Male	Regular Work Hours	<40	16	8	10.75	21.6875	10.9375	11.2308	20.3277	0.661538	1.35308	9.09692	47.2222
477	Female	Regular Work Hours	40-60	10	0	7.80278	20.39	12.5872	8.55211	17.7596	0.862454	2.95894	9.2075	35.5556	15	23	4	11	18
478	Male	Flexible Schedule	<40	14.4207	6	8.32285	21.0833	12.7605	8.95323	20.306	1.29962	1.49258	11.3528	18.6747	23	57	10	24	39
479	Male	Flexible Schedule	<40	13.55	4	9.15917	20.3481	11.1889	9.94373	19.6411	1.47674	0.764398	9.69734	34.7826	20	31	7	15	22
480	Female	Flexible Schedule	40-60	13.1167	3	8.91667	19.3417	10.425	9.4881	18.1036	1.55	1.475	8.61548	16.0305	25	28	7	13	20
481	Female	Regular Work Hours	<40	12.6667	1	7.84611	20.7677	12.9215	8.66991	19.8333	0.8175	2.46697	11.1634	19.6429	62	90	17	37	65
482	Male	Flexible Schedule	<40	14.5167	6	8.86667	20.25	11.3833	10.1035	18.7298	1.54417	1.34907	8.62629	35.6021	34	40	9	17	25
483	Male	Flexible Schedule	<40	14.1833	5	8.67958	20.8497	12.1701	10.3091	19.5528	0.858294	1.80595	9.24371	25.5319	48	63	12	26	43
484	Male	Flexible Schedule	>60	17.1833	9	7.47092	19	11.5291	8.29952	18.3454	1.17177	1.14699	10.0459	11.4094	44	81	14	34	63
485	Female	Flexible Schedule	40-60	14.2667	5	8.04853	19.3065	11.2579	9.30038	18.5402	1.99714	1.19799	9.23985	17.757	46	66	13	29	47
486	Female	Regular Work Hours	<40	14.1374	5	8.98375	21.6326	12.6489	9.75306	19.6473	2.03881	1.21026	9.89425	30.7692	52	77	12	39	62
487	Female	Rotating Shift	<40	12.9	2	7.08333	20.7375	13.6542	9.24167	19.1881	0.847619	2.89762	9.94643	27.044	40	62	10	23	43
488	Female	Flexible Schedule	40-60	13.4667	3	6.36417	20.0842	13.72	7.22179	19.853	0.652564	1.37688	12.6312	13.8028	52	78	10	27	47
489	Male	Night Shift	<40	22.1917	9	9.95833	26.7992	16.8408	15.068	25.8347	6.00606	1.69818	10.7668	32.5581	38	52	13	29	43
490	Female	Flexible Schedule	<40	16.5667	8	11.5471	23.8333	12.2862	12.1094	22.0173	1.42209	1.43714	9.90782	28.4722	27	37	6	14	24
491	Female	Flexible Schedule	>60	15.3483	7	9.92582	23.1156	13.1898	10.8252	21.4256	0.86188	2.50256	10.6005	13.3803	38	74	18	36	58
492	Female	Regular Work Hours	40-60	15.1897	7	7.84278	22.3234	14.4806	8.76397	21.4912	1.00935	1.38891	12.7272	9.82456	39	56	9	21	33
493	Male	Rotating Shift	<40	13.1914	3	7.5	20.2972	12.7972	7.82022	19.0123	1.17575	1.35614	11.192	15.9574	21	28	5	12	20
494	Male	Rotating Shift	40-60	12.5	1	4.80883	19.7801	14.9713	6.56401	18.8373	1.52964	1.15196	12.2733	10.5263	44	69	9	27	53
495	Female	Regular Work Hours	<40	11.4656	0	8.00972	20.3264	12.3167	8.84899	19.0646	1.17053	1.99154	10.2156	26.3889	38	52	10	23	37
496	Female	Regular Work Hours	40-60	15.5333	8	10.2117	21.2029	10.9913	10.5394	19.7688	0.409066	2.04308	9.22942	27.9412	14	18	5	7	11
497	Female	Flexible Schedule	<40	13.5	4	6.57217	20.4678	13.8957	7.96032	20.1334	1.27519	0.540417	12.173	27.957	17	20	5	9	13
498	Female	Flexible Schedule	40-60	14.0386	5	6.94508	19.1294	12.1844	8.55447	18.3963	2.07801	0.815972	9.84187	28.8136	46	80	20	49	68
499	Female	Regular Work Hours	40-60	12.4694	1	7.98056	20.0333	12.0528	8.70272	19.0812	0.967024	1.71403	10.3784	31.2102	47	73	12	30	53
500	Male	Long Work Hours	<40	13.8969	5	8.49667	22.9516	14.4549	8.85645	21.7686	0.8975	1.32575	12.9121	18.5841	30	37	5	13	25
501	Female	Regular Work Hours	<40	14.5417	6	9.17362	19.6642	10.4906	9.90514	18.7839	1.2863	1.3859	8.87877	45.2381	11	13	3	6	10
502	Female	Regular Work Hours	40-60	12.3539	1	4.64166	23.0982	18.4565	5.19692	20.6351	1.33005	3.49345	15.4381	16.1765	27	48	9	23	38
503	Female	Flexible Schedule	40-60	14.5	6	7.91722	21.65	13.7328	8.2919	19.1667	1.14071	2.37562	10.8748	22.6804	2	4	2	2	3
504	Male	Evening Shift	40-60	15.7	8	7.87948	20.5679	12.6884	9.60218	18.6101	2.08551	0.798843	9.00796	28	15	23	6	12	18
505	Female	Regular Work Hours	40-60	13.55	4	8.02542	20.6667	12.6412	9.09896	19.9484	1.87894	2.52806	10.8494	22.5564	37	57	12	28	44
506	Female	Evening Shift	<40	12.7417	2	8.04375	21.966	13.9222	8.78273	20.8997	0.980101	1.79621	12.1169	24.5455	41	61	12	30	49
507	Male	Regular Work Hours	40-60	11.76	0	5.23757	19.571	14.3334	6.01496	17.3599	1.6272	2.13405	11.345	28.8288	24	53	7	17	38
508	Female	Regular Work Hours	<40	9.80833	0	7.31667	18.1354	10.8187	7.73333	16.9557	0.851028	3.42028	9.22233	28.2609	13	15	2	6	11
509	Male	Regular Work Hours	>60	12.7947	2	5.9062	18.9058	12.9995	6.91296	19.291	1.78038	2.01048	12.3781	7.30337	33	49	8	16	30
510	Female	Regular Work Hours	40-60	12.8094	2	9.2665	20.685	11.4185	9.84662	19.0866	0.696273	1.29192	9.24002	23.1884	32	50	8	22	39
511	Female	Flexible Schedule	>60	12.9	2	8.94056	19.37	10.4294	9.65934	18.5963	1.44846	1.00259	8.93699	25.7732	46	68	12	26	44
512	Male	Flexible Schedule	<40	13.7025	4	11.9388	21.2656	9.32681	12.5449	19.8411	0.791111	1.05728	7.29625	44.8718	14	17	5	10	13
513	Male	Long Work Hours	40-60	16.55	8	8.47208	23.215	14.7429	9.68462	22.0038	1.27564	1.52462	12.3192	17.9487	8	10	3	5	7
514	Female	Regular Work Hours	<40	14.3214	6	8.94083	21.5839	12.6431	9.79419	18.6512	1.21519	2.38764	8.85704	41.1765	15	31	5	17	26
515	Male	Flexible Schedule	<40	15.7011	8	9.33333	22.9256	13.5922	11.0611	21.3482	2.12613	2.10915	10.2871	20.6897	32	55	11	22	40
516	Female	Regular Work Hours	>60	17	9	11	20.4303	9.43031	11.4321	18.9973	0.752286	1.01517	7.56521	22.3214	19	32	6	15	22
517	Female	Flexible Schedule	40-60	14.6333	6	8.67875	20.3283	11.6495	9.12576	18.4228	0.592424	0.927323	9.29702	29.6875	12	23	5	10	16
518	Female	Regular Work Hours	40-60	12.9217	2	7.78333	24.75	16.9667	7.90128	21.1692	0.521795	2.12953	13.2679	14.4231	77	111	20	46	79
519	Female	Regular Work Hours	40-60	11.9951	0	7.80583	22.3833	14.5775	9.47229	19.4688	1.41949	2.03824	9.99653	25.7143	31	45	9	23	37
520	Female	Flexible Schedule	<40	12.9583	2	7.48333	21.0688	13.5854	7.93226	19.2695	0.973333	2.03857	11.3372	16.5323	54	86	18	38	62
521	Female	Regular Work Hours	<40	13.9261	5	10.0132	21.1667	11.1535	10.7757	20.1219	1.05231	1.40366	9.34625	30.1205	30	45	10	23	36
522	Male	Evening Shift	<40	13.1492	3	10.9731	22.3613	11.3882	12.105	21.0844	1.09235	1.17096	8.97947	61.0063	28	39	7	13	24
523	Male	Long Work Hours	>60	12.3	1	6.85708	19.3962	12.5392	7.8672	17.7199	1.61038	1.97079	9.85274	37.7551	23	39	6	17	29
524	Female	Flexible Schedule	>60	14.3167	6	7.766	20.4367	12.6707	9.55504	19.228	2.48868	1.58077	9.67297	24.8366	54	97	17	41	74
525	Female	Flexible Schedule	40-60	15.6667	8	8.52017	21.0225	12.5023	9.39425	20.3403	2.04492	1.36071	10.946	10.1322	66	97	15	39	72
526	Female	Flexible Schedule	>60	16.4167	8	9.7	21.1563	11.4563	11.0561	19.2955	1.85758	2.50152	8.23939	26.8041	38	56	12	26	41
527	Female	Evening Shift	40-60	15.6728	8	7.01569	20.6932	13.6775	8.21039	19.5396	2.07578	1.59119	11.3292	26.087	19	30	7	14	21
528	Female	Flexible Schedule	40-60	13.7788	4	8.75	21.1788	12.4288	10.0881	19.5894	1.55348	1.7228	9.50129	30.8824	25	40	6	18	31
529	Female	Regular Work Hours	<40	12.4	1	8.51917	17.7918	9.27268	9.15606	16.9819	0.819697	1.03015	7.82586	48.9362	32	55	15	31	46
530	Male	Flexible Schedule	40-60	13.5667	4	7.94089	21.1925	13.2516	8.90619	19.1785	1.16403	1.71115	10.2723	22.2222	19	35	3	12	22
531	Female	Regular Work Hours	<40	13.4417	3	7.05875	20.7017	13.6429	8.01959	18.891	1.25229	1.27821	10.8714	37.931	11	23	4	11	18
532	Female	Flexible Schedule	<40	14.3667	6	5.55806	21.625	16.0669	7.38844	20.554	2.83107	2.17632	13.1656	26.1682	33	57	12	26	43
533	Female	Regular Work Hours	40-60	11.0417	0	7.32083	20.3104	12.9896	8.51	18.9283	1.62	1.97333	10.4183	20.9302	22	44	5	15	30
534	Male	Flexible Schedule	40-60	13.5346	4	7.54512	20.5239	12.9788	8.68983	19.3261	1.36368	1.9612	10.6362	26.3889	14	22	5	10	16
535	Female	Regular Work Hours	40-60	12.3547	1	6.5	21.4396	14.9396	8.87981	19.7541	3.26315	2.11725	10.8742	36.0759	29	32	6	13	20
536	Female	Regular Work Hours	<40	13.625	4	8.50208	22.1758	13.6738	9.10489	20.9552	0.910726	0.830962	11.8503	19.4444	11	12	3	5	8
537	Male	Flexible Schedule	40-60	13.0167	2	9.16	19.7608	10.6008	10.7377	18.9492	1.74131	1.725	8.21143	20.2128	50	72	20	38	56
538	Female	Regular Work Hours	40-60	12.3667	1	7.785	19.5483	11.7633	8.15833	19.2952	0.79881	0.495397	11.1368	16	33	56	3	10	28
539	Male	Rotating Shift	40-60	14.9293	7	8.55575	20.6603	12.1045	10.5851	20.0049	3.41994	0.585111	9.41989	32.0513	26	32	7	14	23
540	Female	Long Work Hours	40-60	15	7	10.0288	19.6511	9.62228	11.0973	18.7206	1.338	0.626444	7.62328	33.8983	30	56	17	35	48
541	Female	Regular Work Hours	<40	10.1681	0	7.97292	20.3104	12.3375	8.69343	19.3311	0.76744	0.977024	10.6377	26.7857	5	5	2	3	4
542	Female	Regular Work Hours	<40	12.6333	1	7.56278	20.75	13.1872	7.93978	18.7532	1.41304	1.4569	10.8134	26.7267	96	125	29	59	92
543	Female	Long Work Hours	<40	13.82	4	8.61667	23.9417	15.325	9.35075	22.4494	0.652607	2.19278	13.0987	26.2411	42	62	8	23	45
544	Female	Flexible Schedule	40-60	16.5161	8	9.62083	22.6619	13.0411	10.6792	21.0209	1.5852	1.47066	10.3416	16.3793	36	58	12	25	45
545	Male	Flexible Schedule	<40	13.0167	2	6.74667	21.4667	14.72	8.5444	19.8886	2.53556	1.21803	11.3442	37.8378
546	Female	Flexible Schedule	<40	13.2833	3	8.00583	21.0608	13.055	8.96989	19.6709	1.71549	1.68684	10.701	30.6667	28	38	9	17	29
547	Female	Regular Work Hours	40-60	15.0897	7	9.57333	19.6333	10.06	11.0256	18.6063	1.97122	1.10068	7.58064	25.8537	70	95	16	42	69
548	Male	Regular Work Hours	40-60	14.1667	5	7.12667	21.2667	14.14	9.62262	19.6486	1.69405	1.19696	10.026	30.2752	46	52	11	24	41
549	Female	Regular Work Hours	<40	12.7417	2	7.5775	18.8833	11.3058	8.67	17.8383	1.415	1.07769	9.16833	29.6296	28	37	9	21	31
550	Female	Long Work Hours	<40	14.125	5	5.85319	22.2667	16.4135	7.11833	21.8075	1.61556	1.03397	14.6891	9.5	46	59	11	25	39
551	Female	Regular Work Hours	40-60	13.6667	4	8.46667	19.45	10.9833	9.08479	18.3794	0.659145	1.02528	9.29457	22.2892	70	97	18	38	64
552	Female	Flexible Schedule	<40	16.0667	8	10.2	21.7971	11.5971	11.552	20.4184	1.04491	1.31363	8.86641	35.7143	46	60	14	28	45
553	Female	Flexible Schedule	<40	12.6167	1	7.08292	19.8712	12.7883	7.87604	18.6749	2.52232	2.2154	10.7988	21.6667	10	20	4	9	13
554	Female	Regular Work Hours	40-60	13.075	2	7.78421	21.7108	13.9266	8.51704	19.7943	1.07516	2.60905	11.2773	27.7778	30	53	12	26	42
555	Female	Flexible Schedule	<40	12.7139	2	7.06062	19.0514	11.9907	7.91067	18.9649	0.823634	0.878958	11.0542	12.9496	33	47	8	19	31
556	Female	Regular Work Hours	40-60	12.6492	1	7.44705	21.2833	13.8363	7.96782	19.514	1.0124	2.68329	11.5462	14.2045	40	65	5	23	44
557	Male	Regular Work Hours	40-60	13.0826	2	6.50109	19.7237	13.2226	8.09944	17.8922	1.88731	2.6534	9.79271	29.1667	20	27	6	12	21
558	Female	Evening Shift	40-60	10.3667	0	8.03958	19.9351	11.8955	8.56694	16.9126	0.414545	2.31444	8.34563	30.3571	27	39	7	17	30
559	Female	Regular Work Hours	40-60	13.7489	4	7.24689	18.6346	11.3877	7.60909	17.7115	0.713016	1.78679	10.1024	24.7788	30	41	6	17	28
560	Female	Long Work Hours	<40	14.6833	6	7.00156	21.3072	14.3057	8.38637	20.1273	1.8335	2.1688	11.7409	13.6842	28	43	9	20	34
561	Male	Regular Work Hours	40-60	12.6011	1	6.37222	18.8333	12.4611	8.0375	17.4147	1.02663	2.34296	9.37718	27.7228	22	34	6	13	23
562	Male	Long Work Hours	40-60	9.46667	0	5.25	18.1633	12.9133	5.79028	17.1542	0.754722	1.92516	11.3639	25	31	46	9	21	34
563	Female	Flexible Schedule	>60	13.7783	4	8.57222	19.5625	10.9903	9.28394	16.4863	0.819596	2.18949	7.20237	42.4242	18	44	12	22	35
564	Male	Night Shift	<40	20	9	12.2896	25.7711	13.4815	15.3926	24.6128	3.94771	2.26993	9.22023	19.2308	11	14	2	5	10
565	Female	Long Work Hours	40-60	12.2275	1	8	20.25	12.25	8.20377	19.5085	0.976131	1.47514	11.3048	8.37989	37	63	9	22	43
566	Female	Flexible Schedule	<40	14.0047	5	8.14652	22.95	14.8035	10.1515	20.0325	1.93774	3.3	9.88103	28.8462	39	52	9	22	39
567	Male	Flexible Schedule	<40	13.4	3	6.0775	20.5575	14.48	7.21306	18.2534	2.05978	2.88422	11.0403	36.9565	17	26	5	12	20
568	Female	Flexible Schedule	40-60	13.2917	3	6.36076	20.575	14.2142	7.274	19.9603	1.83293	1.90707	12.6863	20.7547	25	30	6	13	20
569	Female	Morning Shift	40-60	13.7833	4	6.51667	19.8204	13.3038	7.57024	19.275	1.02637	0.463552	11.7048	26.2712	26	40	3	10	21
570	Female	Regular Work Hours	40-60	12.7167	2	6.75139	24.5122	17.7608	7.34033	18.3912	0.526778	4.29256	11.0508	36.5385	32	45	9	20	35
571	Male	Regular Work Hours	40-60	13.125	3	6.53403	19.75	13.216	7.45371	19.2929	0.797421	0.942857	11.8391	20.6897	18	21	4	9	15
572	Male	Flexible Schedule	40-60	17.4661	9	6.97134	22.0033	15.032	7.94062	20.9291	0.990741	2.11667	12.9885	18.5185	32	51	11	22	36
573	Male	Flexible Schedule	>60	13.75	4	8.7155	20.0854	11.3699	10.7875	19.2388	1.64729	1.48868	8.45128	30.137	34	51	12	24	35
574	Male	Flexible Schedule	>60	11.5158	0	7.51028	19.8833	12.3731	7.69134	16.0518	0.539491	1.71787	8.36044	25.2252	9	12	3	5	7
575	Male	Regular Work Hours	40-60	12.55	1	6.93589	21.0833	14.1474	7.61327	18.8118	1.16835	2.50337	11.1986	19.7279	45	68	8	25	51
576	Male	Regular Work Hours	40-60	14.8258	6	6.629	21.3529	14.7239	7.29829	20.8171	1.33187	0.942163	13.5188	13.1387	45	80	11	34	62
577	Female	Flexible Schedule	<40	13.7167	4	8.25094	21.2451	12.9942	8.68785	19.6028	0.559773	0.990934	10.9149	36.1702	10	14	2	4	10
578	Female	Flexible Schedule	<40	12.125	1	7.8	19.2237	11.4237	8.59113	17.6421	0.759306	2.6819	9.051	35.5769	26	39	7	17	29
579	Female	Flexible Schedule	>60	14.7417	6	7.62583	23.5371	15.9113	10.0824	20.1979	2.70359	2.4402	10.1155	28.5714	40	66	14	31	52
580	Female	Flexible Schedule	<40	13	2	7.85833	23.7708	15.9125	9.32286	20.7826	1.65489	3.09125	11.4597	34.0426	17	27	7	14	21
581	Female	Regular Work Hours	40-60	13.4333	3	8.96667	19.8729	10.9062	9.92725	18.4839	0.861157	2.06336	8.55669	25.5682	56	76	18	35	56
582	Male	Long Work Hours	40-60	12.6679	1	7.83035	19.8396	12.0092	8.6395	19.5273	0.968611	0.778016	10.8878	15.5172	47	75	13	30	56
583	Male	Regular Work Hours	40-60	14.0542	5	6.0875	20.1386	14.0511	7.20415	19.29	1.85234	1.33002	12.0858	13.6531	46	69	11	23	41
584	Male	Regular Work Hours	40-60	12.05	0	7.04667	19.5333	12.4867	7.78167	19.19	1.295	0.270694	11.4083	31.1927	17	32	4	11	21
585	Female	Flexible Schedule	40-60	14.8167	6	8.5651	19.2333	10.6682	9.03014	18.7982	1.33982	0.833373	9.7681	16.5414	84	122	23	54	89
586	Female	Flexible Schedule	40-60	7.005	0	6.26472	24.6381	18.3733	6.59106	19.8494	0.532702	7.84604	13.2584	46.7742	21	30	5	10	18
587	Female	Regular Work Hours	40-60	13.0333	2	7.43794	18.6531	11.2152	8.05861	17.7866	0.988782	1.43628	9.72797	31.4286	30	48	9	22	38
588	Female	Long Work Hours	40-60	14.4806	6	8.37111	21.0833	12.7122	8.56006	20.2707	1.05391	1.95518	11.7107	8.07453	46	73	10	28	50
589	Female	Regular Work Hours	>60	12.355	1	7.26242	20.9339	13.6715	8.38697	19.5092	1.31135	1.50709	11.1222	32.8125	21	33	6	14	25
590	Female	Flexible Schedule	<40	13.0324	2	7.24005	21.0333	13.7933	8.49871	18.527	1.4478	2.19288	10.0283	36.5854	17	24	4	10	16
591	Male	Long Work Hours	>60	14.3167	6	9.20167	20.0833	10.8817	10.0179	19.3667	0.909957	1.24615	9.34872	18.9873	49	67	14	28	46
592	Male	Long Work Hours	<40	15.05	7	7.80337	21.9605	14.1572	8.67019	21.3278	1.8662	1.6144	12.6576	16.2791	21	34	8	16	25
593	Female	Flexible Schedule	<40	16.0833	8	7.3475	20.4667	13.1192	8.04218	19.4282	0.84047	0.963333	11.386	13.4021	21	38	5	11	21
594	Male	Flexible Schedule	<40	14.0583	5	8.59292	19.8671	11.2742	9.99167	17.7283	2.16667	1.705	7.73667	30	24	26	7	14	20
595	Female	Regular Work Hours	40-60	13.4667	3	7.01667	19.5871	12.5704	7.16778	18.8724	0.865859	1.49939	11.7046	13.8614	37	48	6	15	30
596	Female	Flexible Schedule	40-60	14.1562	5	7.46766	20.7409	13.2732	8.84712	18.5907	1.46577	2.24592	9.74355	40.4255	35	52	10	26	42
597	Female	Long Work Hours	>60	17.2008	9	10.145	20.2707	10.1257	11.6875	19.2597	1.90689	1.81934	7.57222	18.8889	39	66	18	38	55
598	Female	Regular Work Hours	40-60	14.2597	5	6.03333	23.5667	17.5333	8.41363	20.0506	1.91708	4.75104	11.637	17.7515	24	34	8	14	21
599	Female	Regular Work Hours	40-60	12.6597	1	9.15051	20.5827	11.4322	9.91437	19.6829	0.836032	1.07284	9.76851	30.8824	25	40	7	20	32
600	Female	Regular Work Hours	40-60	12.5244	1	6.83606	19.7654	12.9293	7.22579	18.9325	1.1812	1.12505	11.7067	18.4783	31	43	7	16	30
601	Female	Flexible Schedule	40-60	15.4333	7	9.96667	20.7125	10.7458	11.5821	19.5772	1.35699	1.32361	7.99517	13.4615	33	52	9	23	38
602	Female	Flexible Schedule	40-60	13.7308	4	8.69183	19.19	10.4982	9.75379	18.9114	0.767857	0.514286	9.15758	22.7586	53	82	10	32	59
603	Female	Regular Work Hours	>60	12.35	1	5.85975	19.1842	13.3245	6.96605	18.0581	0.852341	1.67913	11.0921	17.6471	34	53	9	19	38
604	Female	Regular Work Hours	40-60	12.9089	2	7.25	19.2333	11.9833	7.65878	18.5218	0.592137	1.85248	10.863	7.45342	63	96	22	46	74
605	Male	Regular Work Hours	<40	15.2481	7	7.83385	22.0268	14.193	8.66897	20.9794	1.2904	1.48157	12.3104	22.0339	26	36	9	17	26
606	Male	Flexible Schedule	<40	14.3494	6	7.48203	21.6285	14.1465	9.52272	20.1951	1.7653	1.91109	10.6724	30.4348	29	42	12	21	32
607	Female	Regular Work Hours	40-60	12.8993	2	6.55317	18.905	12.3518	7.10671	17.9472	0.801032	0.905734	10.8405	21.0526	30	44	6	17	30
608	Male	Long Work Hours	40-60	13.0333	2	6.50111	20.65	14.1489	8.17561	17.8639	2.29005	1.92765	9.68833	46.875	28	37	5	16	29
609	Female	Long Work Hours	40-60	13.85	4	8.30606	19.3383	11.0323	9.03931	18.3691	1.37116	1.72282	9.32977	16.7883	80	95	20	44	75
610	Female	Regular Work Hours	40-60	15.6894	8	7.37923	20.7264	13.3472	7.97004	19.8459	0.802599	1.01645	11.8759	19.3182	27	39	7	15	26
611	Male	Flexible Schedule	>60	12.0053	0	5.88333	19.6	13.7167	7.35587	18.3943	0.97627	1.86421	11.0384	33.8542	47	68	13	26	48
612	Male	Regular Work Hours	<40	11.1333	0	6.1275	19.3542	13.2267	8.19167	17.5	2.25139	2.39498	9.30833	32.5	18	25	6	11	17
613	Female	Flexible Schedule	>60	12.8	2	7.48705	21.2188	13.7317	8.1454	19.1755	0.758829	2.08657	11.0301	17.3077	57	88	21	40	65
614	Female	Regular Work Hours	40-60	14.055	5	8.5	21.5646	13.0646	10.1263	19.8406	2.02836	2.78831	9.71428	22.7273	27	49	13	28	41
615	Female	Flexible Schedule	<40	13	2	8.70433	20.7353	12.0309	10.1453	19.6466	2.07769	2.2935	9.50133	26.0606	28	40	10	17	25
616	Female	Flexible Schedule	40-60	15.3167	7	9.79333	20.9633	11.17	10.8577	19.4464	1.72677	2.55641	8.58872	16.8831	29	47	11	22	36
617	Female	Regular Work Hours	<40	12.45	1	6.49542	19.7763	13.2808	7.28194	17.625	1.34444	2.15417	10.3431	20.3704	36	49	12	24	36
618	Female	Regular Work Hours	40-60	10.1833	0	4.94427	18.2625	13.3182	6.29854	16.7788	1.27644	1.74452	10.4803	33.3333	17	22	2	4	12
619	Male	Regular Work Hours	40-60	14.875	7	7.92458	23.1642	15.2396	8.50513	21.7729	1.29421	2.27194	13.2677	14.6154	39	58	10	24	42
620	Female	Long Work Hours	40-60	14.9083	7	8.94231	21.1115	12.1691	10.4585	19.5874	2.61429	1.98129	9.12884	33.3333	31	50	9	25	40
621	Male	Regular Work Hours	>60	10.7903	0	6.14781	16.4105	10.2627	6.91821	15.6642	0.761151	0.741964	8.74597	15.1515	29	50	8	20	36
622	Female	Flexible Schedule	40-60	11.7833	0	6.95	19.8667	12.9167	8.05338	17.6527	1.45547	2.1035	9.59936	25	47	62	11	27	43
623	Female	Regular Work Hours	40-60	13.5167	4	5.864	23.91	18.046	7.75603	20.6952	3.14844	4.55272	12.9391	28.2051	31	46	7	22	37
624	Male	Long Work Hours	40-60	13.05	2	6.50867	22.0006	15.4919	7.07567	21.1372	0.534097	1.18947	14.0616	31.0976	49	72	17	35	55
625	Female	Long Work Hours	40-60	11.3	0	6.9	18.0554	11.1554	7.65442	16.3934	1.18433	2.05854	8.73898	22.0779	27	40	5	15	30
626	Female	Flexible Schedule	40-60	13.3667	3	8.09917	19.2	11.1008	8.61153	18.5415	0.747937	0.946627	9.92994	25	82	117	27	58	94
627	Male	Flexible Schedule	<40	14.3667	6	8.035	23.2575	15.2225	9.82381	20.9655	2.0869	2.71786	11.1417	20.5607	26	36	8	16	27
628	Female	Flexible Schedule	<40	10.4333	0	7.5	20.1837	12.6837	8.87072	18.9111	1.82199	2.28486	10.0403	47.8992	17	22	5	11	17
629	Male	Flexible Schedule	<40	14.0667	5	7.80167	20.235	12.4333	8.60256	19.0564	1.32479	1.18333	10.4538	29.3578	32	61	12	27	44
630	Female	Flexible Schedule	40-60	14.3267	6	8.25	21.7553	13.5053	8.68931	20.1998	0.808294	2.42687	11.5105	28.0702	32	54	3	15	35
631	Male	Long Work Hours	40-60	10.6333	0	7.39292	21.6762	14.2833	8.47381	17.8369	1.225	3.70417	9.3631	52.381	3	4	2	3	4
632	Female	Regular Work Hours	<40	14.3719	6	8.43333	24.1667	15.7333	9.79938	22.6724	2.35456	2.58869	12.873	26.3889	34	60	9	23	45
633	Female	Regular Work Hours	40-60	16.875	9	8.6156	20.75	12.1344	9.45672	18.6439	0.870833	1.99848	9.18722	34.6154	23	31	7	14	24
634	Female	Regular Work Hours	40-60	18.0167	9	7.08299	26.2187	19.1357	9.23842	20.5589	2.1416	3.05861	11.3205	30.6122	49	87	22	43	69
635	Female	Long Work Hours	<40	14.15	5	8.65417	21.8854	13.2312	9.41157	20.3367	1.39881	1.49522	10.9251	25.4717	40	52	12	24	38
636	Female	Regular Work Hours	40-60	14.65	6	7.90808	21.7086	13.8005	8.91115	19.7422	1.44643	2.49393	10.831	14.4509	37	57	12	27	44
637	Female	Flexible Schedule	<40	12.75	2	7	20.146	13.146	7.79685	19.5445	0.791448	1.13841	11.7476	20.9877	41	58	10	24	42
638	Female	Rotating Shift	40-60	13.5164	4	6.74667	21.2533	14.5067	7.15065	19.5305	0.651726	1.23929	12.3799	21.3793	36	63	9	25	45
639	Male	Flexible Schedule	40-60	13.35	3	9	21.0167	12.0167	9.65	20.3333	0.979345	1.10075	10.6833	24.1667	42	53	12	23	34
640	Male	Regular Work Hours	40-60	12.0142	0	6.75703	20.09	13.333	7.35718	19.3554	0.917407	1.71366	11.9982	34.8837	1	1	1	1	1
641	Female	Flexible Schedule	>60	13.3897	3	8.11194	20.1333	12.0214	8.72796	18.7901	1.07593	0.950675	10.0621	31.401	45	57	9	21	35
642	Male	Flexible Schedule	>60	12.2903	1	7.44542	20.7879	13.3425	7.94622	18.91	0.557528	1.88067	10.9638	27.1429	27	38	6	19	31
643	Female	Rotating Shift	40-60	16.0167	8	11.9333	19.5333	7.6	12.5914	19.331	0.963761	0.611197	6.73964	24.9042	40	71	8	24	44
644	Female	Long Work Hours	40-60	14.0038	5	7.37875	24.2936	16.9148	8.17951	20.1127	1.90605	4.20603	11.9332	15.7895	34	57	12	24	38
645	Male	Regular Work Hours	40-60	17.25	9	8.05333	20.98	12.9267	9.93485	18.1515	2.75189	1.80909	8.21667	44.9438	36	53	15	30	44
646	Male	Regular Work Hours	40-60	18.4215	9	6.02783	22.3238	16.2959	8.06424	20.7028	2.73549	1.43454	12.6386	32.2581	17	22	4	9	16
647	Female	Morning Shift	40-60	13.175	3	7.39389	21.2414	13.8475	7.79199	20.5966	0.803483	0.896752	12.8047	10.9589	34	56	8	21	42
648	Female	Regular Work Hours	40-60	15.4333	7	8.47677	20.4396	11.9628	10.2135	20.1985	2.13937	1.32273	9.98497	16.0377	35	62	12	28	49
649	Female	Regular Work Hours	<40	14.8306	6	8.30225	21.3085	13.0063	8.86337	20.3882	0.739365	1.35349	11.5248	17.757	33	45	5	15	30
650	Male	Flexible Schedule	>60	11.5833	0	7.74708	17.5567	9.80958	8.00147	16.02	0.511306	3.041	8.01853	10.3896	26	32	4	9	15
651	Male	Long Work Hours	<40	11.6	0	6.85086	19.9808	13.13	8.73428	18.481	2.002	2.25056	9.74669	32.7273	25	34	8	17	27
652	Female	Regular Work Hours	>60	13.5419	4	8.39583	21.1625	12.7667	9.37019	18.375	1.28761	2.11299	9.00481	30.9524	26	39	6	17	28
653	Female	Regular Work Hours	<40	14.2667	5	7.09333	21.0158	13.9225	7.1944	18.5566	0.829074	3.93278	11.3622	17.4194	58	78	16	36	61
654	Male	Regular Work Hours	40-60	12.5589	1	8.47083	20.8585	12.3877	9.11187	18.8353	0.685051	2.42308	9.72338	22.6667	20	32	6	14	24
655	Male	Regular Work Hours	40-60	12.15	1	6.51542	18.5742	12.0587	8.38939	17.5453	1.95758	1.82879	9.15586	38	16	22	4	10	16
656	Male	Long Work Hours	40-60	14.9701	7	7.28969	22.9294	15.6398	9.09314	19.7834	2.14822	3.02283	10.6903	28.7234	28	36	5	15	25
657	Male	Morning Shift	<40	13.9885	5	8.53333	19.0979	10.5646	9.10625	18.0699	0.837731	1.73859	8.96366	30	36	63	9	23	45
658	Female	Regular Work Hours	40-60	12.5	1	6.66032	20.2504	13.5901	7.07321	18.6016	0.727424	1.14891	11.5284	26.25	42	92	20	47	74
659	Female	Regular Work Hours	<40	12.7833	2	7.10521	20.5083	13.4031	7.46518	18.6125	0.524405	2.87976	11.1473	23.0769	26	34	6	13	25
660	Female	Long Work Hours	<40	16.95	9	8.16417	23.255	15.0908	10.669	22.5628	2.29167	1.48275	11.8938	29.3333	17	23	3	7	14
661	Female	Regular Work Hours	40-60	12.1339	1	8.81922	21.3583	12.5391	9.66022	18.8994	0.641222	2.33303	9.23919	16.6667	32	44	12	22	35
662	Male	Regular Work Hours	<40	13.6833	4	8.65256	20.9318	12.2792	9.43748	20.1096	0.930726	1.12679	10.6722	34.7222	7	7	1	2	5
663	Female	Flexible Schedule	40-60	15.8174	8	9.99222	22.3329	12.3407	10.5448	21.2421	1.10819	1.54315	10.6973	15.625	8	9	2	3	5
664	Male	Regular Work Hours	40-60	11.5178	0	6.74798	24.227	17.479	7.49356	19.1305	1.34574	3.65002	11.6369	32.7586	5	5	2	3	4
665	Female	Flexible Schedule	<40	16.5667	8	11.3171	21.2883	9.97125	11.4872	21.1962	1.12318	1.63974	9.70895	7.92079	28	41	8	16	26
666	Male	Regular Work Hours	>60	11.5	0	7	17.8871	10.8871	7.52425	16.959	1.5005	1.83778	9.43475	44.4444	12	12	3	6	10
667	Male	Long Work Hours	<40	12.0583	0	6.22125	21.19	14.9688	6.725	18.994	0.816667	2.45952	12.269	15.9091	14	17	3	5	9
668	Female	Regular Work Hours	40-60	16.5	8	7.5	19.8032	12.3033	8.10256	19.0903	0.705128	2.11936	10.9877	16.1074	50	98	19	54	81
669	Female	Regular Work Hours	<40	16	8	5.93667	20.9695	15.0328	6.7375	19.684	0.640505	2.28818	12.9465	24.6154	30	40	5	20	32
670	Female	Regular Work Hours	40-60	13.3572	3	7.74846	18.9563	11.2078	8.98524	17.3918	1.7709	1.23167	8.40658	35	24	54	12	29	44
671	Male	Regular Work Hours	40-60	15.9167	8	7.75633	20.9333	13.177	9.39558	19.0977	1.977	0.971667	9.70214	42.1053	26	38	9	17	29
672	Male	Long Work Hours	<40	13.3	3	6.9736	20.4735	13.4999	7.45955	19.7257	0.414646	1.12427	12.2661	25.4545	9	10	2	4	6
673	Female	Regular Work Hours	40-60	13.0833	2	7.75675	20.3033	12.5466	9.2237	17.5809	1.79433	2.13919	8.35715	32.4675	28	32	7	13	22
674	Male	Flexible Schedule	>60	15.4969	7	8.10259	22.3695	14.2669	9.33338	18.3884	0.975631	1.69404	9.05505	30.7692	16	32	6	15	24
675	Female	Flexible Schedule	40-60	14.0222	5	7.825	23.8366	16.0116	9.59437	20.0436	3.12738	4.16825	10.4493	32.5926	49	77	18	39	59
676	Female	Regular Work Hours	40-60	15.3007	7	4.77542	23.4054	18.63	6.64186	21.3502	3.13226	3.73932	14.7084	21.4286	23	35	6	12	23
677	Female	Regular Work Hours	40-60	13.9833	5	7.03698	20.9479	13.9109	7.03139	20.1906	0.795635	1.01151	13.1592	6.94444	60	98	17	42	73
678	Male	Flexible Schedule	<40	9.63861	0	6.5	22.8167	16.3167	8.08628	18.2778	2.49983	3.10094	10.1915	40.1869	24	34	5	13	23
679	Female	Morning Shift	<40	11.525	0	6.10851	17.2759	11.1674	7.25333	16.2645	0.660278	1.21097	9.01114	30	15	22	3	9	17
680	Female	Flexible Schedule	40-60	11.9167	0	7.65375	18.4356	10.7819	9.59477	16.8972	1.89359	2.45831	7.30247	30	30	47	12	27	39
681	Female	Flexible Schedule	40-60	15.6167	8	10.5083	21.6667	11.1583	12.2605	20.9845	0.722262	1.3279	8.72399	17.0347	47	61	12	25	39
682	Female	Flexible Schedule	>60	15.3333	7	9.69583	20.9967	11.3008	10.2745	19.186	1.17736	2.18681	8.91146	35.6589	65	84	18	39	63
683	Male	Regular Work Hours	40-60	12.75	2	7.99583	24.2644	16.2686	9.25192	20.3222	1.38636	1.40121	11.0703	30.3704	33	43	11	22	32
684	Female	Flexible Schedule	<40	12.5	1	7.09083	20.1029	13.0121	7.50595	18.4434	0.864005	1.21583	10.9375	24.0964	26	32	6	14	23
685	Female	Regular Work Hours	<40	14.2833	5	7.53583	22.0039	14.4681	9.21786	21.1877	1.32855	1.77821	11.9699	17.2414	53	72	17	34	51
686	Male	Flexible Schedule	<40	12.7175	2	7.53238	19.0983	11.566	9.13215	17.8919	1.72843	1.26566	8.75975	22.2222	32	41	7	15	30
687	Female	Long Work Hours	40-60	14.5333	6	6.79375	20.9314	14.1377	7.13544	20.4167	0.795198	2.10302	13.2813	25.7812	48	103	19	46	76
688	Female	Rotating Shift	<40	16.8667	9	9.56667	23.7777	14.211	11.1571	21.3346	1.9869	2.39103	10.1775	30.3448	33	44	9	18	31
689	Female	Flexible Schedule	40-60	15.5781	8	11.1966	20.3542	9.15767	12.222	19.9424	1.05932	1.44551	7.7204	18.6207	36	71	11	29	53
690	Female	Morning Shift	40-60	14.3667	6	7.95	24.0119	16.0619	10.1972	21.8309	2.22367	2.83413	11.6337	29.2308	47	62	9	23	43
691	Female	Flexible Schedule	40-60	10.5956	0	6.48833	21.2886	14.8003	6.97464	17.5687	0.886389	2.93267	10.594	28.3784	17	31	5	13	22
692	Male	Regular Work Hours	>60	14.6933	6	7.95877	20.6034	12.6446	8.48435	19.8679	0.792004	1.81952	11.3836	13.6792	43	52	9	19	33
693	Male	Flexible Schedule	40-60	15.7849	8	7.84866	21.2586	13.41	8.40254	20.8085	1.18371	0.972242	12.406	18	26	45	7	15	29
694	Male	Regular Work Hours	<40	13.0042	2	5.50722	20.695	15.1878	8.34598	19.126	2.19615	2.42545	10.78	21.7391	48	70	14	37	57
695	Male	Regular Work Hours	40-60	14.6803	6	5.64617	20.0323	14.3861	6.83436	18.4525	1.79308	1.31043	11.6182	21.3592	36	47	8	18	33
696	Male	Long Work Hours	40-60	12.7349	2	8.25244	18.5248	10.2723	8.86491	17.858	1.36574	1.01322	8.99312	28	38	54	8	22	38
697	Female	Regular Work Hours	40-60	11	0	6.33778	19.9624	13.6246	7.69534	16.2039	0.923526	3.18453	8.50859	23.1579	18	28	5	10	18
698	Female	Regular Work Hours	40-60	13.025	2	7.92208	22.8014	14.8793	8.41873	21.0905	0.893194	1.14516	12.6718	25.8929	39	61	9	27	46
699	Female	Flexible Schedule	<40	13.5147	4	8.93333	18.4333	9.5	10.6189	18.7944	2.40731	1.17294	8.17551	12.3153	62	91	19	41	68
700	Male	Flexible Schedule	<40	9.96681	0	7.83333	17.8313	9.99792	8.09444	16.8213	0.243056	1.30924	8.72687	39.1304	33	49	10	21	36
701	Male	Regular Work Hours	<40	13.2517	3	6.4359	19.4529	13.017	7.47368	17.2644	1.97183	2.17803	9.79069	44.2308	8	8	1	2	5
702	Female	Flexible Schedule	40-60	14.2833	5	8.66042	19.7875	11.1271	9.00088	18.3163	0.597885	1.5085	9.31545	18.75	9	9	1	3	6
703	Female	Flexible Schedule	40-60	13.4667	3	4.41667	19.8046	15.3879	6.71403	18.6676	2.52796	2.12448	11.9536	21.2963	42	63	13	28	47
704	Female	Flexible Schedule	>60	12.5168	1	8.26472	18.0965	9.83176	8.59088	17.4904	0.280255	1.35481	8.89951	23.8318	56	74	14	26	48
705	Female	Regular Work Hours	40-60	12.5	1	7.80674	19.1956	11.3889	8.5996	18.7667	1.20421	0.964722	10.1671	16.2162	35	62	10	31	50
706	Male	Flexible Schedule	<40	13.0972	3	8.265	19.9	11.635	8.93536	19.1078	0.639762	1.18821	10.1725	23.3333	57	74	16	32	49
707	Female	Evening Shift	<40	17.0667	9	8.07747	24.4792	16.4017	9.71652	22.2977	1.69303	2.14259	12.5812	14.7826	18	32	4	8	16
708	Female	Regular Work Hours	<40	13.59	4	8.02942	19.8333	11.8039	8.71665	19.4985	1.59746	1.09355	10.7818	9.30931	75	108	26	51	77
709	Female	Flexible Schedule	40-60	13.6886	4	6.75685	21.8315	15.0747	6.98288	20.9563	0.927628	2.91274	13.9735	7.91667	51	70	12	28	45
710	Female	Rotating Shift	<40	19	9	5.78756	26.8758	21.0883	10.6874	22.6773	4.93462	2.19816	11.99	29.2135	51	80	20	46	67
711	Female	Flexible Schedule	>60	12.1983	1	7.51317	18.41	10.8968	9.02449	17.2879	1.10002	2.22778	8.26344	19.1489	40	49	13	25	36
712	Female	Regular Work Hours	40-60	12.1815	1	8.08664	18.6059	10.5192	8.70094	17.0946	0.916278	1.32825	8.39367	50	40	54	13	32	46
713	Female	Long Work Hours	<40	14.2097	5	8.50211	23.4854	14.9833	9.32733	20.6325	0.951859	2.84637	11.3051	27.7311	37	46	10	20	35
714	Female	Flexible Schedule	40-60	13.225	3	8.81667	19.9563	11.1396	9.72072	19.0597	1.14558	1.22877	9.339	22.2222	25	41	10	24	35
715	Female	Regular Work Hours	40-60	15.1833	7	7.002	21.7571	14.7551	7.68433	20.6034	0.926151	1.22988	12.9191	14.375	55	93	15	42	73
716	Female	Flexible Schedule	<40	12.275	1	8.26917	16.7654	8.49625	8.82292	15.855	0.609167	1.14833	7.03208	33.3333	31	40	11	20	31
717	Male	Regular Work Hours	<40	11.6	0	6.82551	22.0717	15.2462	7.38173	19.3372	0.513846	2.78818	11.9554	26.6667	11	21	3	9	15
718	Male	Long Work Hours	<40	15.9	8	7.60417	23.05	15.4458	9.58974	22.0641	2.58974	0.990791	12.4744	20.6107	38	47	10	21	32
719	Female	Flexible Schedule	<40	12.8333	2	9.25	20.0625	10.8125	9.62829	19.7105	0.825	2.3362	10.0822	41.5094	20	25	5	10	16
720	Female	Regular Work Hours	40-60	15.7378	8	10.5	20.5	10	10.7874	20.1323	0.546587	2.16294	9.34486	14.9068	19	30	6	10	17
721	Female	Long Work Hours	<40	13.1917	3	7.93333	21.4858	13.5525	8.08192	19.4786	0.570595	1.99131	11.3966	14.2241	58	87	10	31	56
722	Female	Flexible Schedule	40-60	13.6	4	7.25333	19.9705	12.7172	8.56262	19.7094	1.13532	0.753849	11.1468	21.3793	39	69	13	31	53
723	Female	Regular Work Hours	40-60	13.2067	3	7.97244	21.1704	13.198	8.4488	19.3793	1.37532	2.61032	10.9305	28.5714	12	15	3	6	10
724	Male	Regular Work Hours	40-60	14	5	8.37667	21.98	13.6033	10.0262	19.6239	2.55854	3.55083	9.5977	45.614	30	48	9	21	37
725	Female	Regular Work Hours	40-60	11.9917	0	5.56469	23.0359	17.4712	7.28113	18.7808	1.66899	2.52605	11.4997	30.6452	18	25	4	8	16
726	Female	Long Work Hours	40-60	13.7119	4	6.56396	19.15	12.586	8.16458	18.8642	1.3375	0.829653	10.6996	24.3243	52	73	19	40	60
727	Male	Flexible Schedule	<40	16.1412	8	10.085	22.23	12.145	10.8245	20.9903	1.74085	1.44991	10.1657	12.963	26	31	7	14	21
728	Female	Regular Work Hours	40-60	15.9239	8	7.59987	20.7838	13.1839	7.73702	20.7298	0.610476	0.547619	12.9927	6.42857	52	84	10	28	52
729	Male	Long Work Hours	40-60	13.3853	3	7.26722	20.4333	13.1661	8.42419	19.6401	2.12238	1.22877	11.2159	17.3554	49	77	17	38	61
730	Female	Flexible Schedule	<40	15.2306	7	9.30804	21.1333	11.8253	10.3907	19.6975	0.876709	1.64329	9.30682	20.8511	41	56	12	24	38
731	Female	Flexible Schedule	40-60	13.5	4	5.8	19.4833	13.6833	9.08601	18.4118	2.26175	1.81063	9.32583	33.3333	47	75	17	35	58
732	Male	Flexible Schedule	<40	14.7	6	9.77833	21.0629	11.2846	11.1833	18.6267	1.9	1.85333	7.44333	15.5738	20	41	6	13	29
733	Female	Regular Work Hours	40-60	14.1736	5	9.48589	21.013	11.5271	10.1297	19.8566	0.767639	0.982556	9.72689	29.2308	36	43	9	18	32
734	Male	Flexible Schedule	>60	13.6231	4	9.5075	18.9833	9.47583	10.3619	18.5219	0.658036	0.93377	8.15992	18.5328	41	66	7	19	41
735	Female	Long Work Hours	<40	14.5067	6	9.565	22.5163	12.9513	10.7478	22.0937	1.67355	2.10188	11.3458	22.9358	27	40	9	17	27
736	Female	Flexible Schedule	40-60	13.0417	2	7.82167	21.6412	13.8196	8.35194	19.3313	0.938356	2.36785	10.9794	27.4194	26	36	8	18	28
737	Male	Regular Work Hours	40-60	10.2737	0	4.46944	19.47	15.0006	6.21085	18.5622	2.17314	2.09665	12.3513	33.6207	35	53	10	23	39
738	Female	Flexible Schedule	40-60	11.7833	0	8.14833	18.5274	10.3791	8.51026	17.7029	0.459444	0.948397	9.19265	14.5455	28	48	9	20	35
739	Male	Flexible Schedule	40-60	18	9	13.0125	21.2437	8.23125	14.1	20.6833	1.60833	0.641306	6.58333	27.0492	17	25	7	13	18
740	Male	Regular Work Hours	40-60	13.9972	5	6.78792	19.6829	12.895	8.16848	18.3899	1.99475	2.29194	10.2215	29.3478	20	33	7	15	25
741	Female	Regular Work Hours	40-60	12.0667	0	4.21992	17.1764	12.9565	5.5253	16.7576	1.17148	0.862569	11.2323	26.4151	23	33	5	15	26
742	Male	Flexible Schedule	<40	13.8464	4	9.06528	24.6433	15.5781	9.43264	20.6436	0.862361	1.92667	11.2109	16	38	43	8	17	32
743	Male	Regular Work Hours	>60	13.5667	4	6.25167	22.085	15.8333	8.41154	19.1962	2.21184	2.66363	10.7846	26.8817	27	37	8	17	26
744	Male	Flexible Schedule	<40	16.3917	8	9.04542	22.2838	13.2383	10.6954	21.7214	2.17919	1.13452	11.026	14.0845	20	28	6	12	18
745	Female	Regular Work Hours	<40	14.95	7	8.55542	22.9407	14.3853	9.63615	21.3193	0.895556	2.03552	11.6832	18.0851	28	47	9	21	34
746	Male	Flexible Schedule	40-60	17.4142	9	8.79958	25.1075	16.3079	10.0452	21.8659	1.90134	2.84315	11.8207	27.5862	23	32	6	14	22
747	Male	Long Work Hours	<40	14.7	6	9.62683	21.1	11.4732	10.2714	19.7367	0.904017	0.901838	9.46528	28.1081	48	75	15	33	56
748	Female	Long Work Hours	40-60	14.04	5	7.6775	24.2809	16.6034	9.89924	22.39	1.83125	1.43583	12.4907	27.7778	36	44	8	19	33
749	Female	Regular Work Hours	<40	14.4333	6	10	20.9505	10.9505	10.3751	19.3314	0.62688	1.14709	8.9563	29.2208	22	27	6	10	17
750	Female	Flexible Schedule	40-60	18.3836	9	8.02333	21.8225	13.7992	10.8006	20.2094	1.3197	2.30972	9.40884	28.5714	31	43	9	23	35
751	Male	Regular Work Hours	40-60	14.5147	6	7.88854	20.3037	12.4152	8.5148	19.7025	0.727857	0.783472	11.1877	15.2439	16	25	4	8	16
752	Male	Flexible Schedule	40-60	15.5322	8	7.03572	21.511	14.4753	7.5824	20.2252	0.632143	1.37161	12.6428	16.1017	21	36	2	11	24
753	Female	Flexible Schedule	40-60	11.3869	0	6.99326	18.5632	11.5699	7.46611	16.6332	0.571692	2.52351	9.16712	32.7273	24	24	5	10	18
754	Female	Long Work Hours	40-60	14.6333	6	7.25	22.2044	14.9544	8.28004	20.1776	0.817044	2.48454	11.8976	31.3636	40	55	8	15	33
755	Female	Rotating Shift	40-60	12.2553	1	6.75	18.0667	11.3167	8.01998	17.1385	1.79632	1.91498	9.1185	34.4697	34	40	10	17	23
756	Female	Flexible Schedule	40-60	18.6667	9	9.10807	22.6993	13.5913	11.6709	21.9931	2.47497	2.13742	10.3222	18.3908	31	42	12	22	32
757	Female	Regular Work Hours	40-60	12.2356	1	6.33222	20.4603	14.1281	8.34882	19.152	0.889699	2.31824	10.8031	23.7762	40	62	10	20	41
758	Female	Rotating Shift	40-60	13.6	4	7.26799	22.8342	15.5662	8.65823	20.755	2.26079	2.40972	12.0968	22.9885	6	13	1	3	8
759	Female	Rotating Shift	<40	15.1306	7	7.99083	22.5815	14.5906	10.3155	19.9994	0.840417	1.47639	9.68397	27.1186	23	35	8	17	28
760	Female	Regular Work Hours	40-60	12.0833	0	6.56125	18.3628	11.8015	6.71667	17.1176	0.546845	1.24099	10.4009	30.8511	48	85	15	38	65
761	Female	Regular Work Hours	40-60	14.2519	5	7.45625	20.4021	12.9458	8.4876	18.8179	1.53274	1.85079	10.3303	22.093	8	9	1	3	5
762	Female	Regular Work Hours	<40	14.8374	7	8.56875	21.0705	12.5017	9.50417	20.1943	0.797222	0.887083	10.6901	28.8462	15	21	5	9	14
763	Female	Regular Work Hours	40-60	14.7431	6	8.66667	24.0006	15.3339	9.41938	20.3445	0.747817	2.86046	10.9251	24.2321	38	54	8	20	34
764	Male	Flexible Schedule	<40	14.3167	6	9.78333	21.0474	11.264	9.88885	19.0509	0.605377	1.17685	9.16204	17.1171	41	54	6	19	40
765	Female	Flexible Schedule	>60	16.795	9	10.0858	19.2633	9.17747	11.1594	18.6013	0.941843	0.899545	7.44189	26.3158	19	21	5	10	14
766	Female	Regular Work Hours	>60	13.9667	5	6.25	22.3892	16.1392	7.42275	20.5247	1.72169	2.77742	13.102	28.4024	53	86	14	36	65
767	Female	Flexible Schedule	<40	10.0333	0	5.63631	19.0158	13.3795	5.86754	21.3066	2.00746	2.85417	15.4391	4.54545	75	112	21	44	76
768	Female	Rotating Shift	40-60	16.0806	8	8.475	22.0474	13.5724	8.76804	20.0316	1.11238	2.03079	11.2635	22.7092	58	75	13	27	48
769	Male	Long Work Hours	<40	15.65	8	10.3667	23.7333	13.3667	11.2241	21.0603	1.29341	3.01401	9.83617	29.3785	37	50	8	21	34
770	Male	Long Work Hours	40-60	18.25	9	7.72292	20.7829	13.06	9.38937	19.7878	1.81212	1.49619	10.3985	39.0244	17	33	7	16	25
771	Male	Long Work Hours	40-60	13.9583	5	7.21178	21.5421	14.3303	8.08633	20.9736	1.14125	0.939901	12.8873	12.6667	34	48	8	19	33
772	Female	Flexible Schedule	40-60	13.7167	4	9.335	20.1861	10.8511	10.3174	18.9534	1.78486	1.70704	8.63602	27.8481	13	20	3	7	13
773	Female	Flexible Schedule	<40	12.7167	2	7.36667	20.6903	13.3236	8.26714	18.4635	0.653611	2.69192	10.1963	21.3115	17	25	6	11	19
774	Female	Flexible Schedule	<40	15.3156	7	9.47083	23.75	14.2792	10.1917	19.7434	1.10139	3.6587	9.55178	15.1163	44	75	19	42	62
775	Female	Long Work Hours	<40	13.5	4	7.58125	24.5	16.9187	8.34561	18.1213	1.07167	4.00911	9.77567	46.2963	30	44	9	23	36
776	Female	Regular Work Hours	40-60	13.3472	3	5.14529	21.6458	16.5005	6.45569	19.7237	1.86787	2.58051	13.268	30.7692	36	43	9	19	33
777	Female	Morning Shift	<40	11.9417	0	5.70625	19.6052	13.899	6.76	17.8207	1.18011	2.27528	11.0607	33.9286	14	22	5	11	16
778	Female	Regular Work Hours	40-60	14.1833	5	6.63646	20.1948	13.5583	7.65686	19.5659	1.11261	1.38432	11.909	16.6667	30	52	6	21	39
779	Male	Regular Work Hours	<40	14.445	6	9.98931	19.2574	9.26811	10.5341	18.351	1.00631	1.25845	7.81687	9.02256	32	41	8	18	29
780	Female	Flexible Schedule	>60	13.5089	4	7.51116	18.7929	11.2818	8.93017	17.6289	1.58314	2.05897	8.6987	35.0877	27	54	13	25	40
781	Male	Regular Work Hours	40-60	14.255	5	6.77189	23.3006	16.5287	8.13216	20.6123	1.70017	2.89079	12.4802	27.8351	39	67	7	26	50
782	Female	Regular Work Hours	<40	14.2468	5	7.67788	21.2192	13.5413	9.47568	19.9044	2.39173	1.03882	10.4287	27.6786	52	77	17	41	63
783	Female	Regular Work Hours	40-60	11.45	0	8.17583	18.4558	10.28	8.83939	17.4485	0.524242	1.82576	8.60909	22.973	15	30	5	11	21
784	Female	Rotating Shift	<40	13.75	4	8.68278	23.2658	14.5831	9.18579	19.905	0.582393	1.86274	10.7193	20.9424	47	75	16	34	55
785	Female	Flexible Schedule	<40	11.9978	0	5.01167	20.4739	15.4622	6.90349	17.1674	2.10054	3.19097	10.2639	42.029	26	43	10	21	34
786	Male	Regular Work Hours	40-60	14.9167	7	11.1604	22.1137	10.9533	11.7026	19.697	0.68006	2.82379	7.9944	17.1875	29	37	7	16	25
787	Male	Regular Work Hours	40-60	15.0892	7	6.32333	20.2714	13.9481	7.45321	19.8239	1.99643	0.824782	12.3707	23.9669	16	31	4	11	20
788	Female	Flexible Schedule	40-60	12.7576	2	6.91795	19.0925	12.1745	7.54882	17.5517	1.1762	1.81835	10.0029	25.641	28	57	8	24	40
789	Female	Flexible Schedule	>60	12.7106	2	6.3944	20.7688	14.3743	7.52907	18.5046	1.77495	1.91204	10.9755	24.359	27	48	5	22	38
790	Female	Regular Work Hours	>60	13.9667	5	10.1471	19.84	9.69285	10.7063	18.6737	0.736644	1.41688	7.96748	23.0769	46	59	11	28	42
791	Female	Regular Work Hours	40-60	11.066	0	6.37066	20.1762	13.8055	7.76111	18.7626	1.53326	1.70119	11.0015	15.6863	38	58	12	27	46
792	Female	Regular Work Hours	40-60	14.5833	6	9.23667	18.7367	9.5	10.4987	17.8141	1.41115	1.34231	7.31538	24.8588	56	88	23	46	70
793	Male	Regular Work Hours	40-60	19.3181	9	7.16431	22.4336	15.2693	8.0172	20.9117	1.86891	1.43654	12.8945	35.8779	28	49	9	22	36
794	Female	Flexible Schedule	40-60	13.4858	4	7.42462	20.2767	12.852	8.0419	18.9899	0.753214	1.91391	10.948	17.7966	61	79	13	39	63
795	Female	Flexible Schedule	40-60	15.2717	7	8.9	22.2	13.3	8.99135	20.9468	0.777778	1.97444	11.9555	14.6497	78	113	21	44	79
796	Female	Long Work Hours	<40	14.5833	6	6.35	19.93	13.58	7.3971	19.5333	0.616607	0.866687	12.1362	14.7465	40	54	9	20	31
797	Female	Regular Work Hours	<40	14.0281	5	7.5125	22.7475	15.235	7.75258	20.3713	0.592424	2.77288	12.6187	23.622	30	43	7	18	29
798	Female	Flexible Schedule	40-60	13.5464	4	8.22583	20.3667	12.1408	10.3718	20.2031	1.38709	1.05526	9.83137	20.7792	74	123	31	64	95
799	Male	Regular Work Hours	40-60	13.4807	4	6.98056	23.8634	16.8828	7.386	21.4904	0.961667	2.76681	14.1044	34.2857	9	9	3	5	7
800	Female	Regular Work Hours	40-60	15.1167	7	9.69375	20.6265	10.9327	9.88771	19.7591	2.14857	0.875534	9.87141	23.1183	62	105	20	48	82
801	Female	Flexible Schedule	<40	12.9	2	5.51347	19.4117	13.8982	7.15994	17.9711	1.81647	2.14381	10.8111	10.1449	26	34	7	17	25
802	Female	Rotating Shift	40-60	11.1833	0	6.33458	22.3087	15.9742	7.39405	18.6328	1.25952	3.73099	11.2387	35.7143	55	85	9	24	58
803	Female	Regular Work Hours	<40	13.45	3	7.88333	19.4502	11.5669	8.55329	18.9891	1.08214	1.68357	10.4358	18.9427	34	46	10	19	30
804	Male	Regular Work Hours	>60	19.4	9	7.4	20.35	12.95	7.99879	20.0296	0.997024	0.479563	12.0308	27.4336	22	30	7	13	20
805	Male	Regular Work Hours	40-60	14.6667	6	10.1417	19.8417	9.7	10.9573	19.3115	1.63645	1.01261	8.35421	21.7822	33	55	12	29	45
806	Female	Regular Work Hours	40-60	13.2389	3	8.73	18.5	9.77	9.27109	17.2581	1.11234	1.6188	7.98701	31.8841	31	50	10	22	39
807	Female	Regular Work Hours	40-60	18.8419	9	9.50167	24.5	14.9983	11.1121	21.6572	2.58248	1.91222	10.545	21.4286	35	56	13	28	45
808	Female	Regular Work Hours	40-60	12.95	2	8.60759	19.2997	10.6921	9.09049	18.2814	0.806987	1.1506	9.19088	26.087	43	74	10	28	50
809	Female	Flexible Schedule	40-60	15.7833	8	6.95125	23.1708	16.2196	9.17694	21.598	2.60669	1.3969	12.4211	26.1905	45	62	12	34	51
810	Female	Regular Work Hours	<40	11.9833	0	7.33389	18.2308	10.8969	8.78611	17.5788	1.74603	1.32694	8.79268	23.7624	48	80	16	35	59
811	Female	Regular Work Hours	40-60	17.1172	9	7.47511	19.8792	12.4041	8.54905	19.9141	1.99853	1.97498	11.365	8.44156	38	55	12	25	39
812	Female	Long Work Hours	40-60	16.3	8	7.39928	23.8333	16.4341	10.2811	19.786	2.76919	1.92013	9.50492	13.6986	28	41	8	22	34
813	Female	Regular Work Hours	<40	17.8983	9	10.5333	22.5	11.9667	11.8474	20.8794	1.63596	0.930707	9.03194	29.2453	57	89	21	45	72
814	Male	Long Work Hours	>60	12.0667	0	7.30417	20.5064	13.2022	7.94606	17.4964	1.02981	2.88558	9.55036	28.0702	24	34	10	18	28
815	Female	Long Work Hours	40-60	12.7667	2	7.71824	20.95	13.2318	8.45591	20.1903	1.76224	1.42956	11.7344	11.3821	33	53	8	21	38
816	Male	Flexible Schedule	40-60	14.0167	5	7.31667	22.6492	15.3325	8.25833	21.4738	0.916667	2.05728	13.2155	20.4651	43	59	10	24	39
817	Male	Long Work Hours	40-60	11.7167	0	6.60035	19.1164	12.516	7.16103	17.3374	0.970873	1.64276	10.1763	19.4444	36	44	10	18	29
818	Female	Regular Work Hours	<40	16.8647	9	11.25	22.9004	11.6504	12.281	20.5403	1.18889	1.50914	8.25931	28.0899	30	47	11	23	38
819	Female	Flexible Schedule	<40	13.9667	5	8.71608	20.6989	11.9828	9.2947	19.8927	2.21298	1.61623	10.598	17.9487	50	74	16	36	55
820	Male	Long Work Hours	<40	18.975	9	8.82128	22.0019	13.1807	10.852	21.3226	2.27403	0.997306	10.4706	25	19	24	7	12	17
821	Male	Long Work Hours	40-60	12.1333	1	6.44167	19.3057	12.864	7.44764	18.6262	1.51022	0.987361	11.1786	20.1835	35	55	12	23	36
822	Male	Regular Work Hours	40-60	12.4414	1	7.00167	19.6333	12.6317	9.32581	18.6664	1.29204	1.79028	9.34058	32.2222	16	21	3	5	11
823	Male	Regular Work Hours	40-60	14.3833	6	11.45	19.9089	8.45892	12.1139	19.631	0.915764	0.738356	7.51711	17.0455	36	55	14	34	47
824	Male	Regular Work Hours	40-60	15.5333	8	8.50067	22.1423	13.6417	9.55425	20.5771	1.54542	1.95081	11.0229	20	28	47	10	22	37
825	Female	Flexible Schedule	<40	14.8167	6	8.91667	21.2518	12.3351	9.67148	20.839	0.84213	2.31037	11.1675	22.0513	75	111	19	45	82
826	Female	Regular Work Hours	40-60	16.6414	8	7.54021	21.1269	13.5867	8.86975	17.9823	1.10889	2.89694	9.11258	58.0645	7	8	3	6	7
827	Male	Long Work Hours	40-60	14.2667	5	7.944	21.9264	13.9824	9.03589	19.5698	1.08258	1.80498	10.5339	17.5258	47	62	11	30	50
828	Female	Regular Work Hours	40-60	12.0189	0	8.375	20.3056	11.9306	9.71889	19.9412	1.53975	1.09479	10.2223	47.7273	14	28	6	16	24
829	Female	Regular Work Hours	40-60	17.1	9	9.54856	19.4167	9.8681	9.96526	17.4737	0.625128	1.36784	7.50846	36.8132	35	37	10	18	25
830	Female	Flexible Schedule	40-60	15.25	7	9.065	21.15	12.085	10.2424	20.1348	1.7726	1.04755	9.89237	35.5556	19	30	6	12	22
831	Female	Flexible Schedule	<40	15.0161	7	10.8817	22.3183	11.4367	12.4796	21.1041	1.46083	1.51586	8.6245	23.3766	21	40	11	21	32
832	Female	Regular Work Hours	>60	12.6417	1	7	19.1399	12.1399	7.29938	18.9589	0.836204	2.11718	11.6595	17.5	44	63	9	26	47
833	Female	Regular Work Hours	40-60	12.9394	2	6.725	21.15	14.425	7.35282	20.1746	0.647262	2.27028	12.8218	13.2653	54	65	12	28	42
834	Male	Long Work Hours	40-60	18.5667	9	9.81333	22.8167	13.0033	11.2953	21.4984	2.02528	1.37814	10.2031	21.8978	44	61	11	26	45
835	Female	Regular Work Hours	<40	13.9167	5	8.825	21.0892	12.2642	10.0749	20.1577	1.30194	1.36207	10.0828	36.1446	45	63	10	27	46
836	Male	Regular Work Hours	<40	11.6583	0	7.45	24.3069	16.8569	7.85825	21.0709	0.741333	1.87806	13.2127	22.8571	29	33	8	14	22
837	Male	Long Work Hours	40-60	11	0	6.97708	22.675	15.6979	7.4949	22.0963	0.498294	0.864087	14.6013	18.6047	27	40	7	18	27
838	Female	Long Work Hours	40-60	15.3833	7	6.57073	21.1325	14.5618	7.8022	19.9907	2.39162	0.849957	12.1885	26.3158	32	52	11	25	42
839	Female	Flexible Schedule	<40	18.0878	9	11.8942	25.3183	13.4241	12.7871	22.3089	1.74819	1.99438	9.52175	24.7191	21	26	5	12	17
840	Female	Long Work Hours	40-60	14.6167	6	10.0317	21.1233	11.0917	11.2625	19.6593	1.20368	1.76907	8.39676	25.974	27	42	11	21	33
841	Female	Regular Work Hours	40-60	15.1753	7	7.18733	21.8422	14.6549	9.18201	20.8899	2.51876	0.822158	11.7079	21.6495	22	35	5	13	26
842	Male	Flexible Schedule	<40	16.875	9	9.82812	21.7603	11.9322	10.6246	21.2528	1.10264	0.669676	10.6282	19.2982	34	62	13	29	49
843	Female	Regular Work Hours	40-60	15.3333	7	10.9583	23.3833	12.425	12.0046	21.0616	0.449325	2.53766	9.05702	11.0638	64	109	23	47	81
844	Male	Long Work Hours	<40	15.2278	7	10.8562	24.0331	13.1768	11.0923	20.9724	0.996968	2.58438	9.88009	13.2353	30	49	9	21	36
845	Female	Long Work Hours	<40	9.15	0	5.43333	27.9	22.4667	7.54167	18.6723	1.38461	4.15081	11.1306	32.6531	21	43	6	18	33
846	Female	Regular Work Hours	<40	13.1211	3	6.97254	22.7909	15.8183	8.31758	21.3509	1.73358	1.37225	13.0334	29.0323	20	27	8	14	22
847	Male	Regular Work Hours	<40	14.0667	5	6.85833	21.7033	14.845	7.77282	19.9867	0.936964	1.82974	12.2139	31.9149	15	17	5	9	12
848	Female	Flexible Schedule	40-60	12.8567	2	6.56299	20.0627	13.4997	7.73366	19.4919	0.81625	1.08854	11.7582	17.9348	44	88	18	40	67
849	Female	Flexible Schedule	<40	15.5	7	9.45569	21.5	12.0443	9.77206	19.8516	0.727063	1.65125	10.0796	24.5614	34	44	9	18	31
850	Male	Long Work Hours	<40	17.4	9	12.8667	22.9167	10.05	13.2907	21.4493	0.816068	1.27162	8.15853	23.7895	77	133	21	50	85
851	Male	Long Work Hours	40-60	14.1039	5	11.7833	21.1117	9.32833	12.7811	20.0048	0.743944	0.628778	7.22375	48.8372	22	37	10	17	29
852	Female	Long Work Hours	40-60	13.619	4	7	20.8978	13.8978	8.20577	18.8689	2.31709	2.66637	10.6631	37.8378	20	34	4	10	22
853	Male	Regular Work Hours	40-60	11.0626	0	6.00162	21.2396	15.238	7.62914	18.4536	1.22078	2.54348	10.8244	36	4	7	3	4	5
854	Female	Flexible Schedule	40-60	13.1672	3	7.89172	18.32	10.4283	8.41891	16.9789	0.728843	1.98275	8.56	33.5766	48	75	7	25	54
855	Male	Long Work Hours	40-60	13.2928	3	7.91667	20.2243	12.3077	8.64897	19.306	0.901865	1.72339	10.6571	18.9781	37	47	5	16	30
856	Male	Morning Shift	40-60	10.6667	0	4.96542	15.7274	10.762	5.18556	13.955	0.483077	1.8991	8.76947	37.3626	21	39	9	19	31
857	Female	Long Work Hours	40-60	13.3897	3	7.32789	21.1867	13.8588	8.05801	20.4594	1.46165	1.24825	12.4014	20	52	77	12	33	59
858	Female	Long Work Hours	40-60	12.9833	2	8.96458	20.2459	11.2814	9.35274	19.2679	1.01631	1.80016	9.9152	14.7059	40	54	8	20	39
859	Female	Flexible Schedule	40-60	13.326	3	6.57083	21.1439	14.573	7.80804	19.1747	1.42837	2.15833	11.3666	20	57	89	18	44	71
860	Female	Regular Work Hours	40-60	16.5153	8	9.89417	22.6194	12.7252	11.8321	21.4573	2.42563	1.49495	9.62523	27.7778	33	54	14	29	44
861	Female	Regular Work Hours	40-60	13.6333	4	9.25	22.4763	13.2263	9.81366	21.5484	1.14025	1.04819	11.7347	23.4234	29	53	12	25	42
862	Female	Regular Work Hours	>60	14.1	5	7.8425	22.6592	14.8167	9.97179	20.9615	2.08077	1.64231	10.9897	22.9885	38	73	15	34	56
863	Male	Flexible Schedule	<40	14.6217	6	7.0519	19.3667	12.3148	7.93605	18.4965	2.04355	1.26496	10.5605	19.8413	42	50	10	20	31
864	Male	Regular Work Hours	<40	13.4167	3	7.75	22.0443	14.2943	9.33874	18.1204	1.74086	3.0697	8.78162	50.5747	32	36	7	16	27
865	Female	Regular Work Hours	40-60	15.3667	7	7.67917	20.1832	12.504	9.85933	18.7744	2.58366	1.89157	8.91502	25.3731	18	32	6	15	26
866	Male	Regular Work Hours	<40	16.0225	8	7.61792	21.7637	14.1458	8.24652	20.2065	0.790299	1.67124	11.96	25.5319	40	57	12	25	45
867	Female	Regular Work Hours	40-60	12.0833	0	7.59375	20.1223	12.5286	9.11	19.0698	1.14848	1.33783	9.95982	38.8889	2	15	4	10	13
868	Female	Flexible Schedule	<40	11.5833	0	7.02597	16.2917	9.26569	7.60133	15.0714	0.482143	1.52619	7.4701	27.8689	32	46	9	22	35
869	Male	Regular Work Hours	40-60	13.25	3	5.69142	19.4945	13.8031	7.89543	19.2425	1.55786	1.27868	11.3471	11.3821	44	68	12	30	53
870	Female	Regular Work Hours	40-60	15.0636	7	7.80193	22.8104	15.0084	8.86018	19.5972	1.25762	1.90859	10.737	28	47	66	12	35	54
871	Male	Flexible Schedule	<40	13.3769	3	4	20.1333	16.1333	9.77758	19.5353	1.67349	1.44466	9.75768	24.4604	38	62	16	32	47
872	Male	Regular Work Hours	40-60	13.275	3	8.32	21.1467	12.8267	9.04286	19.9381	0.947619	1.27262	10.8952	20.2703	17	20	3	7	12
873	Male	Regular Work Hours	<40	15.7333	8	7.83	19.7433	11.9133	11.1064	19.4923	1.52564	0.201282	8.3859	22.449	23	25	5	9	15
874	Female	Flexible Schedule	40-60	13.0167	2	7.19985	19.7251	12.5253	9.39581	19.0793	1.47403	1.1221	9.68347	22.8814	37	54	11	24	42
875	Female	Long Work Hours	<40	13.7667	4	7.16667	20.6972	13.5306	8.51461	20.0555	1.11002	1.19866	11.5409	22.2222	28	43	8	17	31
876	Male	Flexible Schedule	40-60	18.5	9	7.61083	21.8667	14.2558	9.60989	20.508	3.50283	1.36167	10.8981	35.2941	20	31	6	15	25
877	Male	Flexible Schedule	40-60	14.7822	6	9.66361	20.1906	10.527	10.8919	19.3934	1.23598	0.848077	8.50158	35.4839	36	46	9	18	32
878	Female	Morning Shift	<40	11.9586	0	6.52856	20.88	14.3514	8.09008	18.7011	1.7129	2.60864	10.611	23.5955	51	80	17	41	65
879	Male	Regular Work Hours	40-60	15.7292	8	9.04119	25.1642	16.123	10.1687	23.7922	1.2119	2.48956	13.6235	14.0097	24	46	1	8	24
880	Female	Long Work Hours	<40	8.67167	0	4.14342	27.8077	23.6642	5.01459	18.7504	1.31763	5.60158	13.7359	25.3165	33	46	8	18	33
881	Female	Long Work Hours	<40	11.7833	0	7.03333	17.65	10.6167	7.41785	16.7721	0.45	1.925	9.35421	25.1748	41	62	12	28	47
882	Female	Regular Work Hours	40-60	13.425	3	8.87042	17.2475	8.37708	9.61667	16.6929	1.17381	0.57619	7.07619	19.6721	40	60	12	24	40
883	Female	Flexible Schedule	40-60	16.3	8	8.72831	23.5198	14.7914	10.1301	21.9211	1.67243	2.64882	11.7909	29.7872	34	55	9	24	43
884	Female	Regular Work Hours	40-60	12.8156	2	8.35451	21.6619	13.3074	9.04381	20.2105	1.03119	1.15924	11.1667	19.4805	41	49	10	21	34
885	Female	Regular Work Hours	40-60	18.55	9	8.84417	22.1333	13.2892	10.5952	20.6992	2.53155	1.3676	10.104	31.7757	27	46	9	20	36
886	Male	Regular Work Hours	40-60	14.1667	5	8.0075	24.5131	16.5056	9.11724	21.5792	1.27729	2.56436	12.4619	30.0971	28	37	8	17	27
887	Female	Regular Work Hours	40-60	14.2333	5	8.75	21.3717	12.6217	9.76236	20.7068	1.05276	1.16177	10.9444	29.3878	47	76	10	24	46
888	Male	Regular Work Hours	<40	11.65	0	7.71667	17.7067	9.99	7.8244	16.8402	0.294872	1.29455	9.01583	44.186	4	5	2	3	4
889	Female	Regular Work Hours	40-60	15.0061	7	4.69417	21.2725	16.5783	7.02024	17.1276	1.23214	2.4076	10.1074	28.3582	7	12	3	4	6
890	Female	Flexible Schedule	>60	14.0369	5	8.76521	20.7556	11.9904	9.48919	18.2094	1.20268	2.54952	8.7202	19.6078	13	18	4	9	14
891	Male	Regular Work Hours	>60	13.4667	3	8.46042	19.5325	11.0721	10.1027	19.265	2.30583	0.598333	9.16233	36.8421	11	11	3	5	7
892	Male	Regular Work Hours	40-60	14.25	5	6.98089	22.0798	15.0989	8.59594	20.0878	2.28156	2.68928	11.4919	34.6667	44	60	9	25	46
893	Female	Regular Work Hours	>60	12.8667	2	8.5	20.9333	12.4333	10.011	20.3347	1.19521	0.531838	10.3237	31.746	44	77	11	28	53
894	Female	Regular Work Hours	40-60	12.9378	2	7.5	19.75	12.25	7.80282	18.9313	1.52019	2.34438	11.1285	18.8172	42	66	12	27	46
895	Female	Flexible Schedule	<40	19.4703	9	7.61152	24.35	16.7385	9.09715	21.9672	1.99681	2.20412	12.87	23.8372	24	41	9	18	29
896	Male	Long Work Hours	>60	13.1083	3	6.425	21.3625	14.9375	7.59692	19.7071	1.81432	2.42871	12.1102	45.6522	6	13	3	4	8
897	Female	Regular Work Hours	40-60	13.3167	3	8.15028	19.5703	11.42	9.07442	18.9952	0.819048	0.936567	9.92081	24.1379	63	81	15	33	57
898	Male	Flexible Schedule	<40	16.05	8	8.54567	21.4083	12.8627	11.0113	19.2553	1.929	1.67203	8.24394	34.4828	11	11	2	4	7
899	Female	Regular Work Hours	<40	13.6667	4	8.33333	21.01	12.6767	9.49776	18.676	2.38915	1.36513	9.17829	38.961	17	19	4	8	14
900	Female	Regular Work Hours	<40	13.7833	4	7.54825	19.3187	11.7705	8.62147	17.4635	0.742436	1.62509	8.84199	23.1579	28	42	6	14	29
901	Female	Regular Work Hours	<40	12	0	8.11667	19.7144	11.5978	8.98657	18.8998	1.44045	2.18859	9.91326	27.381	52	98	22	54	81
902	Female	Regular Work Hours	40-60	7.33333	0	6.27361	18.5043	12.2307	7.52425	15.4075	1.466	5.59917	7.88328	58.7302	17	19	4	7	13
903	Male	Rotating Shift	<40	12.2908	1	6.34767	20.1603	13.8126	7.23722	18.7325	1.26792	2.20208	11.4952	27.8195	12	15	4	6	9
904	Male	Long Work Hours	40-60	13.5	4	8.23549	18.2485	10.0131	9.23363	17.8872	0.938591	0.50744	8.65355	18.3099	10	10	2	4	7
905	Male	Evening Shift	<40	13.7826	4	9.27708	20.5812	11.3041	10.0318	19.3741	0.715128	1.78564	9.34231	19.1489	16	21	5	9	14
906	Male	Regular Work Hours	40-60	14.7667	6	9.9	19.9583	10.0583	11.22	18.8233	0.661667	2.15667	7.60333	21.2766	33	38	10	17	24
907	Female	Rotating Shift	<40	18.8833	9	10.8	25.3878	14.5878	13.8291	23.8906	2.80444	1.68522	10.0616	25.1656	43	75	18	35	59
908	Male	Rotating Shift	>60	13.7032	4	8.16708	20.9483	12.7812	9.70119	18.9459	1.24048	1.85246	9.24468	17.6923	33	50	10	21	34
909	Female	Regular Work Hours	40-60	12.7333	2	6.30278	21.0108	14.7081	7.94386	18.3879	1.11402	2.73333	10.444	27.7778	16	33	4	12	23
910	Female	Long Work Hours	40-60	14.3747	6	8	21.9767	13.9767	9.38802	19.3792	2.4725	2.0275	9.99119	37.3684	59	91	17	39	70
911	Female	Regular Work Hours	<40	18.2747	9	10.2635	24.5065	14.243	11.5219	21.7646	1.92359	2.86336	10.2426	31.25	3	4	1	2	3
912	Female	Regular Work Hours	<40	14.1947	5	8.56403	23.6829	15.1189	9.88581	20.7422	1.32482	4.40068	10.8564	34.7222	9	12	1	3	7
913	Female	Flexible Schedule	<40	17.05	9	8.43667	18.2833	9.84667	9.09167	17.7318	0.953552	0.658929	8.64018	28.1513	60	93	19	40	67
914	Female	Regular Work Hours	40-60	15.2167	7	8.54083	21.5379	12.9971	9.82893	20.7438	1.65274	1.09188	10.9149	24.5455	38	55	7	22	40
915	Male	Long Work Hours	<40	17.3333	9	9.80331	18.0221	8.21877	10.1194	17.4712	0.665732	0.20303	7.35177	28.4615	34	39	6	16	26
916	Female	Rotating Shift	<40	14.3219	6	10.0803	21.756	11.6757	11.3683	20.9957	1.98507	1.67007	9.62736	22.5352	42	58	13	28	46
917	Female	Flexible Schedule	40-60	15.45	7	6.65	18.7333	12.0833	6.8455	17.7314	0.694107	1.66113	10.8859	11.8012	34	55	12	24	38
918	Male	Flexible Schedule	>60	11.1667	0	7.81667	20.2969	12.4803	7.69704	19.8658	0.800179	1.07778	12.1687	9.63173	68	95	17	32	54
919	Male	Regular Work Hours	>60	18.5833	9	8.63706	20.6731	12.0361	10.2164	19.5408	2.39783	1.04596	9.32439	28.5714	27	47	11	26	39
920	Female	Flexible Schedule	>60	16.0717	8	7.48942	22.7711	15.2816	10.7528	20.2175	1.55453	1.88957	9.46474	23.6364	31	47	12	25	37
921	Female	Long Work Hours	<40	16.2167	8	10.7213	22.347	11.6257	11.5554	21.0298	1.2716	1.71299	9.47442	28.5714	24	44	12	25	37
922	Female	Regular Work Hours	<40	12.35	1	6.66222	21.3369	14.6747	7.19665	18.3045	0.99998	1.98623	11.1079	38.9535	44	69	11	30	52
923	Female	Flexible Schedule	40-60	10.425	0	5.1075	20.6888	15.5813	6.60058	18.085	2.28397	2.38476	11.4844	31.5789	30	48	7	19	36
924	Female	Regular Work Hours	>60	15.3667	7	7.6725	21.6367	13.9642	8.49359	20.7145	1.45632	1.7259	12.2209	20.202	18	40	5	11	26
925	Female	Flexible Schedule	<40	14.0078	5	10.6786	19.9285	9.2499	11.4714	18.5191	0.860208	1.3375	7.04769	25.4902	47	74	15	36	59
926	Female	Regular Work Hours	40-60	13.9	5	7.53358	20.5633	13.0297	8.82977	18.8981	1.41521	1.44604	10.0684	35.8491	4	4	2	3	3
927	Male	Flexible Schedule	40-60	10.4167	0	6.17125	18.527	12.3557	8.17741	17.4263	1.29093	1.6638	9.24889	33.3333	19	31	6	15	25
928	Male	Flexible Schedule	<40	14.6706	6	6.80167	21.4906	14.6889	8.15094	20.2512	1.77667	1.28359	12.1002	28.3784	43	65	10	21	38
929	Female	Evening Shift	40-60	13.7833	4	6.155	22.5117	16.3567	8.57894	21.1902	1.46616	1.97671	12.6112	26.0606	44	73	14	34	55
930	Female	Regular Work Hours	40-60	13.6964	4	8.8475	22.3244	13.4769	9.90879	21.0174	1.18394	1.75056	11.1086	23.8806	41	58	12	34	49
931	Female	Flexible Schedule	40-60	12.8181	2	8.22033	20.009	11.7887	9.19343	19.5947	1.55623	1.11016	10.4013	25.3731	49	70	13	31	55
932	Female	Flexible Schedule	40-60	13.35	3	6.6075	21.6333	15.0258	7.30658	20.4484	1.44578	1.71689	13.1418	17	66	76	14	33	56
933	Female	Regular Work Hours	40-60	11.7833	0	5.51583	19.386	13.8701	6.37854	17.5585	1.09023	3.55458	11.18	28.9773	45	65	13	30	47
934	Female	Flexible Schedule	40-60	12.9899	2	6.68878	20.5224	13.8336	7.82483	19.7812	1.04624	1.24449	11.9563	24.6032	14	25	4	9	15
935	Female	Flexible Schedule	40-60	14.45	6	8.92939	22.0397	13.1103	10.719	18.4875	1.94742	2.0598	7.76843	17.6	38	66	11	27	51
936	Female	Flexible Schedule	40-60	14.7997	6	10.3167	19.2675	8.95083	11.2038	18.7713	0.880754	1.17506	7.56752	30.8642	35	62	18	39	53
937	Male	Regular Work Hours	40-60	13.5606	4	7.32933	21.1923	13.8629	8.62722	20.0919	1.85953	2.21806	11.4647	25.8824	41	50	10	22	38
938	Female	Long Work Hours	<40	15.1169	7	8.95489	21.59	12.6351	9.95786	19.8363	0.858291	1.19968	9.87848	24.5283	64	90	15	36	61
939	Male	Flexible Schedule	40-60	11.1131	0	5.39403	20.324	14.93	7.38544	17.4791	2.33881	2.45586	10.0937	22.9508	16	26	6	13	20
940	Male	Flexible Schedule	>60	14	5	7.75833	20.0979	12.3396	8.28414	19.2583	0.816065	0.968866	10.9742	27.551	32	42	9	19	30
941	Male	Regular Work Hours	40-60	14.3417	6	7.88	20.7367	12.8567	8.75412	20.5724	1.13872	1.61355	11.8183	13.8462	32	61	12	27	47
942	Female	Regular Work Hours	<40	12.0142	0	7.50306	20.0983	12.5953	7.91047	19.0116	0.530056	1.84833	11.1011	34.9206	24	28	7	15	21
943	Female	Flexible Schedule	40-60	14	5	8.00389	22.5475	14.5436	9.33547	20.3285	1.16355	1.52778	10.993	31.5315	27	64	10	31	51
944	Female	Long Work Hours	>60	13	2	7.73333	22.4417	14.7083	8.63137	19.1523	0.881429	2.55185	10.5209	39.726	45	62	13	29	47
945	Male	Rotating Shift	40-60	14.3551	6	6.59542	21.2496	14.6542	7.55357	20.4628	2.03317	1.04351	12.9092	32.4074	29	45	7	17	31
946	Female	Flexible Schedule	40-60	14.1333	5	7.63333	20.46	12.8267	9.13688	19.469	1.45833	0.952381	10.3322	25.5385	82	96	18	41	66
947	Female	Regular Work Hours	<40	14.6106	6	9.08333	21.0654	11.9821	10.1293	21.0826	2.38929	1.70485	10.9533	17.8571	44	53	11	26	43
948	Female	Regular Work Hours	<40	13.05	2	7.875	20.8417	12.9667	8.61521	17.88	1.40229	1.26021	9.26476	37.7049	29	45	7	20	35
949	Female	Long Work Hours	<40	14.0568	5	8.34605	22.8817	14.5356	8.86919	21.5714	1.60925	2.02456	12.7022	11.8421	41	80	14	42	65
950	Male	Regular Work Hours	<40	13.65	4	7.71667	23.5164	15.7997	8.51655	21.0951	1.05778	1.11484	12.5785	32.9897	31	47	5	13	28
951	Male	Regular Work Hours	40-60	13.0344	2	6.64158	20.8412	14.1997	7.82609	19.5138	2.0551	1.34984	11.6877	25.4902	33	43	7	17	29
952	Female	Regular Work Hours	40-60	12.2667	1	7.87083	18.0958	10.225	9.00376	17.2667	0.945534	0.978205	8.26291	26.3736	31	52	11	25	40
953	Female	Flexible Schedule	>60	13.5197	4	9.5861	19.785	10.1989	10.429	19.2793	1.19793	0.727475	8.85025	26.4706	36	51	11	23	34
954	Male	Regular Work Hours	<40	12.9167	2	7.08833	17.905	10.8167	8.06389	16.8903	1.51111	1.5375	8.82639	33.3333	30	37	9	17	29
955	Female	Regular Work Hours	<40	9.585	0	8.36972	19.4011	11.0313	9.10601	18.3473	0.717045	1.81177	9.24129	57.2581	27	35	5	11	22
956	Female	Regular Work Hours	40-60	13.4492	3	6.8404	20.2118	13.3714	7.48944	19.2445	1.28412	2.31628	11.7551	15.7895	41	54	10	21	34
957	Female	Long Work Hours	40-60	10.65	0	5.75	18.45	12.7	6.95833	16.1	0.789583	2.95023	9.14167	23.7624	32	47	5	16	35
958	Male	Evening Shift	<40	16.4058	8	9.20122	22.325	13.1238	9.96365	19.9872	1.28026	1.92179	10.0235	25	33	47	9	20	35
959	Female	Long Work Hours	<40	12.5	1	6.6	20.1401	13.5401	8.56578	18.4168	1.31442	3.10106	9.85104	33.9623	46	66	18	37	55
960	Female	Flexible Schedule	40-60	14.5	6	6.13	20.2223	14.0923	7.63329	19.132	1.97718	1.32153	11.4987	34.7368	43	85	17	46	70
961	Male	Regular Work Hours	>60	12.4417	1	6.7711	21.1592	14.3881	7.25198	19.8917	0.702738	1.04391	12.6397	16.9231	48	66	12	29	50
962	Female	Regular Work Hours	40-60	12.4167	1	6.0701	23.5625	17.4924	6.72937	18.6273	0.65298	3.28636	11.8979	30.9091	13	16	3	7	11
963	Male	Regular Work Hours	40-60	13.8833	5	8.00802	22.3667	14.3586	9.99091	18.9818	1.90303	1.49848	8.99091	27.6316	13	15	3	5	10
964	Female	Flexible Schedule	<40	14.2089	5	8.26644	22.0145	13.748	9.21837	20.259	1.28518	2.09024	11.0406	18.8525	7	8	3	4	5
965	Male	Regular Work Hours	<40	13.5833	4	8.08224	22.66	14.5778	8.90565	19.6337	0.924663	2.73833	10.728	28.5714	11	16	2	6	10
966	Female	Long Work Hours	>60	13.5104	4	7.26629	20.3696	13.1033	7.85014	18.2029	0.647937	2.63758	10.3527	36.25	24	38	7	17	29
967	Male	Regular Work Hours	40-60	14.6864	6	5.44039	20.3795	14.9391	7.30042	18.912	1.65688	1.49097	11.6116	23.8095	34	50	11	25	40
968	Female	Regular Work Hours	<40	15.7133	8	9.61667	19.7933	10.1767	10.1245	19.1146	1.16812	1.27083	8.9901	24.7423	33	51	12	24	40
969	Male	Regular Work Hours	40-60	12.5	1	5.75512	21.7478	15.9927	7.65109	20.3594	1.83265	1.95056	12.7083	27.7108	27	46	5	17	34
970	Male	Long Work Hours	40-60	13.7208	4	8	19.4238	11.4238	8.60573	18.9657	0.794979	0.427735	10.36	36.8421	29	46	8	22	37
971	Male	Flexible Schedule	40-60	14.9167	7	7.6924	23.35	15.6576	7.93174	21.1837	1.63512	1.60556	13.2519	17.9487	29	38	8	16	25
972	Male	Flexible Schedule	40-60	14.5492	6	9.00139	24.1386	15.1372	9.56096	18.7059	0.373838	1.35634	9.14492	58.0882	18	27	5	9	15
973	Female	Flexible Schedule	40-60	14.1039	5	12	20.2224	8.22236	11.9656	19.9515	0.670513	1.22075	7.9859	6.43275	43	71	13	31	54
974	Female	Morning Shift	40-60	13.0669	2	6.85417	18.1147	11.2606	7.46679	17.6638	1.13849	1.22752	10.197	18.6813	40	60	11	27	47
975	Female	Regular Work Hours	40-60	16.4801	8	4.67163	27.6745	23.0028	6.33647	23.3487	1.9385	3.38045	17.0123	30	47	70	14	33	53
976	Male	Flexible Schedule	<40	14.3833	6	8.51625	21.6167	13.1004	9.34694	19.2873	1.4197	2.78662	9.94034	21.7391	25	29	7	13	20
977	Male	Flexible Schedule	>60	14.1275	5	6.93784	21.7756	14.8377	7.48683	20.3166	1.06206	2.25272	12.8298	18.0556	41	55	9	23	40
978	Female	Flexible Schedule	<40	12.9333	2	8.765	18.0833	9.31833	9.38077	17.3167	1.37991	1.70105	7.9359	17.094	56	84	23	49	70
979	Male	Regular Work Hours	<40	12.6833	2	8.49	18.9467	10.4567	8.84206	18.2382	0.624861	1.18167	9.39618	15.3285	28	40	7	14	24
980	Male	Regular Work Hours	40-60	13.9417	5	7.07292	22.2725	15.1996	8.12976	21.7298	2.26786	1.19643	13.6	17.4242	23	30	2	6	15
981	Female	Flexible Schedule	40-60	13.6333	4	9.33125	20.2235	10.8922	9.6296	18.3893	0.774343	2.98202	8.7597	29.8077	39	60	14	33	49
982	Female	Flexible Schedule	>60	13.4821	4	7.94733	22.2947	14.3474	9.53335	20.5483	1.40944	1.95754	11.015	28	40	59	10	26	43
983	Female	Regular Work Hours	40-60	12.8667	2	6.67854	21.2333	14.5548	7.0772	20.8223	0.842976	1.83847	13.7451	12.5828	58	93	17	46	75
984	Male	Flexible Schedule	<40	14.4597	6	8.30914	25.2438	16.9347	8.93359	22.7603	2.15635	4.47524	13.8267	13.4694	48	61	8	21	37
985	Female	Regular Work Hours	40-60	16.8833	9	10.5596	19.6017	9.04211	10.783	18.835	2.07917	1.67804	8.052	9.85401	45	77	13	29	49
986	Male	Regular Work Hours	>60	14.7	6	9.20797	22.1047	12.8967	10.6696	20.8826	2.2806	2.10846	10.2131	27.7778	20	34	6	15	27
987	Female	Regular Work Hours	<40	10.2833	0	5.15908	18.675	13.5159	6.06391	17.7214	1.54881	1.29343	11.6575	28.0488	8	9	1	2	6
988	Male	Regular Work Hours	40-60	12.8833	2	6.77476	19.7767	13.002	7.67969	19.0344	0.598833	0.7785	11.3547	27.0833	21	23	6	12	18
989	Female	Long Work Hours	40-60	13.4999	4	6.49944	22.0191	15.5197	8.38947	20.773	2.13011	0.893778	12.3835	23.0769	35	48	8	25	39
990	Female	Flexible Schedule	<40	13.4	3	8.8	20.4633	11.6633	10.3327	18.5509	1.48944	1.97597	8.21819	35.2	34	48	11	22	35
991	Female	Regular Work Hours	40-60	14.6833	6	6.81167	21.1853	14.3737	7.05994	20.3344	1.00044	1.17909	13.2745	15.625	51	83	15	36	60
992	Female	Long Work Hours	<40	11.15	0	6.10333	18.0218	11.9185	6.96078	16.7513	0.874722	2.90409	9.79051	30.7692	46	56	12	29	46
993	Male	Long Work Hours	40-60	13.3842	3	7.25	21.9696	14.7196	7.97901	20.7493	0.868829	1.34643	12.7703	23.4783	35	53	11	21	36
994	Female	Flexible Schedule	40-60	12.9803	2	6.19111	20.2662	14.0751	7.14274	19.0933	1.73228	1.57411	11.9505	11.5756	61	74	8	23	43
995	Male	Flexible Schedule	40-60	13.1833	3	7.59	19.6367	12.0467	9.16801	18.6369	1.19506	1.06436	9.46889	26.0274	37	51	11	24	40
996	Female	Regular Work Hours	40-60	14.5	6	5.14157	19.5558	14.4143	6.99591	19.2012	2.51611	2.14915	12.2053	9.85222	39	52	10	20	34
997	Male	Long Work Hours	<40	17.0117	9	6.05	22.2703	16.2203	7.53986	19.759	2.37111	2.91114	12.2191	43.2432	16	25	5	13	21
998	Male	Long Work Hours	40-60	15.1333	7	7.57571	21.5944	14.0187	10.0832	18.7105	2.95783	2.49869	8.62725	33.3333	26	41	10	22	34
999	Male	Flexible Schedule	<40	13.2333	3	9.2464	21.4563	12.2099	9.80667	19.8125	0.64375	2.50613	10.0059	24.3243	26	31	6	14	23
1000	Female	Long Work Hours	40-60	15.1	7	7.995	21.3606	13.3656	8.86266	20.8811	1.03167	0.859722	12.0185	17.4312	36	58	8	22	41
1001	Female	Flexible Schedule	40-60	14.3667	6	8.75444	23.5849	14.8305	10.2567	20.5658	0.928077	2.90532	10.3091	29.4118	47	60	11	27	46
1002	Female	Regular Work Hours	<40	12.6822	2	6.25	20.3481	14.0981	8.00229	19.4647	1.90962	1.72603	11.4624	28.3688	49	82	17	41	66
1003	Female	Flexible Schedule	40-60	15.7333	8	8.5975	22.46	13.8625	9.22738	22.031	0.814286	0.961905	12.8036	21.0526	15	18	3	6	11
1004	Female	Regular Work Hours	40-60	13.8639	4	7.6116	21.211	13.5994	8.10056	20.184	0.973294	1.34032	12.0834	22.549	45	60	8	25	45
1005	Female	Flexible Schedule	40-60	17.0833	9	8.96	25.9833	17.0233	10.0618	22.6641	1.75683	2.65128	12.6022	20	31	44	6	16	31
1006	Female	Regular Work Hours	40-60	14.3336	6	9.00271	25.5327	16.53	10.0513	20.3964	1.03032	1.78079	10.3451	29.5775	19	26	5	12	18
1007	Female	Flexible Schedule	>60	15.85	8	6.09505	22.8813	16.7863	6.48542	22.9081	2.52194	1.43202	16.4227	5.90278	81	99	5	25	59
1008	Female	Regular Work Hours	40-60	12.45	1	7.16667	19.2246	12.058	7.66415	18.3846	0.474915	1.20551	10.7204	19.544	77	127	24	53	92
1009	Male	Flexible Schedule	40-60	18	9	14.2578	22.4971	8.23928	14.5387	22.0087	2.39823	0.92735	7.46998	13.0178	38	68	10	25	47
1010	Female	Regular Work Hours	40-60	16.3833	8	8.47042	20.6976	12.2272	10.0145	19.7875	2.72178	1.18475	9.77294	18.8525	56	72	15	31	54
1011	Female	Long Work Hours	40-60	13.9833	5	8.16667	20.5217	12.355	8.79954	19.6597	0.571852	1.21812	10.8602	21.1111	39	74	14	33	58
1012	Male	Morning Shift	<40	10.6539	0	5.72	20.5417	14.8217	6.25369	19.758	1.24929	1.69397	13.5043	26.178	47	73	12	32	53
1013	Female	Regular Work Hours	40-60	13.8167	4	6.90467	22.3789	15.4742	9.35564	20.2689	2.87111	2.33244	10.9133	17.3913	39	59	12	26	46
1014	Female	Regular Work Hours	40-60	12.55	1	6.01176	18.6264	12.6147	7.41046	18.0311	1.92726	1.54004	10.6207	26.3158	46	82	18	44	67
1015	Female	Flexible Schedule	>60	11.7	0	6.925	17.55	10.625	7.88771	16.6239	1.12235	1.03222	8.73618	28.9474	38	53	17	29	44
1016	Male	Long Work Hours	40-60	16.9003	9	8.54051	22.7603	14.2197	10.6644	22.0251	2.63699	1.29896	11.3608	20	35	43	7	17	30
1017	Male	Regular Work Hours	>60	12.65	1	5.11311	19.567	14.4539	5.88566	17.9273	1.90828	2.68732	12.0417	44.1176	17	26	2	10	18
1018	Female	Long Work Hours	<40	16.6347	8	8.08583	23.6961	15.6103	9.26681	21.6177	2.75171	2.58843	12.3509	21.1454	43	61	9	20	35
1019	Female	Long Work Hours	40-60	9.87722	0	7.71747	20.5042	12.7867	8.33366	17.077	0.687121	3.08308	8.74333	42.8571	17	21	4	9	17
1020	Female	Flexible Schedule	<40	15.0042	7	8.01	23.1863	15.1763	9.44293	21.2015	1.54071	1.73444	11.7585	17.4497	35	41	10	18	28
1021	Female	Flexible Schedule	<40	15.9833	8	10.6958	20.2333	9.5375	12.0932	19.7043	1.70357	0.669286	7.61109	18.4211	34	55	14	26	43
1022	Female	Long Work Hours	40-60	17.0167	9	6.78083	23.345	16.5642	8.46328	19.4985	1.98765	1.60722	11.0352	26.506	36	73	19	45	62
1023	Male	Regular Work Hours	<40	12.55	1	7.71472	19.7887	12.0739	8.34379	18.9322	0.856488	1.03897	10.5884	36.7521	32	38	9	17	27
1024	Male	Regular Work Hours	<40	14.3667	6	9.55	19.4879	9.93792	11.1883	18.7378	1.39044	0.830231	7.54951	48	24	38	11	22	32
1025	Female	Regular Work Hours	40-60	16.0333	8	7.51297	21.6329	14.1199	8.52355	20.447	1.56407	1.26726	11.9235	18.2979	51	79	15	32	53
1026	Male	Regular Work Hours	<40	12.9333	2	9.1225	21.4975	12.375	9.58205	19.5282	0.516132	1.50641	9.94615	19.0476	8	10	3	6	9
1027	Female	Regular Work Hours	<40	14.9833	7	9.85	20.9753	11.1253	9.34903	20.9399	0.945873	0.457183	11.5909	4.90196	71	115	24	48	75
1028	Male	Flexible Schedule	40-60	15.5078	7	8.74458	23.9053	15.1607	9.46897	22.5153	0.679744	1.70472	13.0463	20.5882	23	35	5	12	23
1029	Male	Regular Work Hours	40-60	14.4333	6	8.08448	21.4125	13.328	9.59484	20.113	1.39127	1.50867	10.5182	27.4336	63	85	17	40	62
1030	Female	Flexible Schedule	40-60	14.0161	5	8.00142	22.9925	14.9911	10.0271	20.7845	2.30812	2.52032	10.7575	28.0488	28	43	10	21	34
1031	Female	Regular Work Hours	40-60	11.75	0	5.67178	19.2202	13.5484	6.88123	18.1225	1.60938	1.67565	11.2413	36.4865	41	55	11	25	42
1032	Female	Flexible Schedule	<40	12.0403	0	7.01483	21.1402	14.1253	7.47293	19.0872	0.420101	2.41596	11.6143	23.3766	22	32	7	15	24
1033	Female	Flexible Schedule	40-60	12.9167	2	6.94167	19.3444	12.4028	7.84643	18.9669	0.694048	0.607659	11.1205	24.2188	47	64	10	25	46
1034	Male	Flexible Schedule	<40	14.2	5	10.3854	20.7092	10.3238	10.9096	20.306	0.289286	0.763095	9.39633	14.5455	39	59	10	27	46
1035	Female	Evening Shift	40-60	10.2721	0	6.60125	20.1125	13.5113	7.58979	18.5677	1.31685	2.02569	10.9779	25	44	54	9	25	40
1036	Male	Regular Work Hours	40-60	13.6917	4	9.48333	18.6317	9.14832	9.60756	18.5577	0.310754	2.41631	8.9501	21.1864	20	26	6	11	17
1037	Female	Long Work Hours	40-60	11.9667	0	6.55	19.5069	12.9569	7.49844	17.2586	1.59286	2.01795	9.76017	24.1176	37	45	5	13	28
1038	Male	Long Work Hours	<40	16.8	9	5.82264	20.9157	15.0931	8.33727	19.6085	2.21713	0.983426	11.2712	25.3968	10	12	2	5	9
1039	Female	Rotating Shift	<40	12.2578	1	6.25833	24.0111	17.7528	7.46708	20.193	0.865417	2.84171	12.7259	31.0811	30	51	11	25	41
1040	Female	Flexible Schedule	<40	12.8536	2	7.09594	19.6342	12.5382	8.72962	18.8736	1.50984	0.859107	10.144	17.0455	37	48	11	22	34
1041	Female	Long Work Hours	40-60	12.1333	1	7.97667	20.5716	12.5949	9.20702	18.6869	1.19924	2.40237	9.47985	29.5238	42	50	9	22	38
1042	Female	Flexible Schedule	40-60	14	5	8.88958	23.4	14.5104	9.60513	19.9372	1.15	1.85934	10.3321	29.1667	38	59	13	30	48
1043	Male	Regular Work Hours	<40	10.7003	0	8.10833	22.0778	13.9695	8.75164	20.7966	0.660354	2.68899	12.0449	35.8209	22	25	5	10	17
1044	Female	Flexible Schedule	<40	13.1333	3	6.24583	19.17	12.9242	6.67381	18.5821	1.575	1.20476	11.9083	8.80503	39	61	10	23	41
1045	Male	Regular Work Hours	40-60	16.1531	8	4.2234	20.7437	16.5203	5.98679	18.9456	2.03785	1.43922	12.9588	23.6842	21	45	9	21	35
1046	Female	Flexible Schedule	40-60	14.8	6	8.255	21.7858	13.5308	10.3308	19.3756	1.6466	2.51835	9.04487	39.3939	30	45	11	20	31
1047	Female	Regular Work Hours	40-60	15.4083	7	10.5267	24.3553	13.8287	11.5549	20.6342	0.883056	1.61288	9.07932	43.75	5	5	2	4	5
1048	Male	Long Work Hours	<40	12.8083	2	6.95	23.1602	16.2102	8.08818	19.1306	1.85881	3.37164	11.0424	24.4186	34	40	9	18	32
1049	Female	Regular Work Hours	40-60	13.8846	5	6.42708	23.5125	17.0854	7.98575	19.9104	2.12897	2.02641	11.9246	27.3585	33	44	4	15	30
1050	Female	Flexible Schedule	<40	14.2747	5	6.34167	20.5875	14.2458	7.36821	19.614	1.73688	1.11068	12.2457	29.1391	61	80	18	39	63
1051	Male	Long Work Hours	<40	15	7	5.5	20.19	14.69	7.18545	19.2154	1.23049	1.70581	12.0299	24.0506	11	12	2	5	8
1052	Female	Regular Work Hours	<40	16.0161	8	9.36667	22.5756	13.2089	10.3686	21.5153	1.15475	1.24839	11.1467	22.9508	32	38	10	21	32
1053	Female	Regular Work Hours	>60	12.35	1	7.07667	20.1088	13.0321	8.20355	19.2537	0.960913	1.07948	11.0501	24.5283	24	35	7	14	26
1054	Male	Long Work Hours	<40	14.5056	6	9.49021	22.8619	13.3717	10.3977	21.5873	1.1584	1.73926	11.1896	16.3636	39	57	12	28	46
1055	Female	Regular Work Hours	<40	19	9	9.00667	22.1	13.0933	9.76419	21.051	1.52934	1.18252	11.2869	24.7423	26	42	9	20	32
1056	Female	Long Work Hours	40-60	13.4271	3	7.28258	21.0812	13.7987	7.92526	19.2402	0.72631	2.25855	11.3149	25.5102	43	66	16	35	54
1057	Female	Regular Work Hours	40-60	14.9667	7	6.56042	21.5028	14.9424	7.36258	21.3059	0.939286	1.39764	13.9433	23.2394	106	159	30	66	110
1058	Female	Regular Work Hours	40-60	13.0167	2	7.96	22.7633	14.8033	8.70333	20.905	1.24667	3.02167	12.2017	26.6667	32	39	4	12	28
1059	Female	Regular Work Hours	40-60	13.0083	2	7.36115	20.9454	13.5843	8.24359	20.336	0.966548	1.55468	12.0924	29.2793	55	68	13	27	43
1060	Male	Long Work Hours	40-60	13.0165	2	7.73917	19.9554	12.2163	8.66786	19.2769	0.845238	1.48881	10.6091	19.1489	65	93	16	40	68
1061	Female	Long Work Hours	<40	13.275	3	8.03333	18.5667	10.5333	8.87433	18.219	1.17912	0.947639	9.34463	27.2277	56	89	18	41	67
1062	Male	Evening Shift	40-60	15.0418	7	10.4194	22.3794	11.96	11.1528	20.5658	1.045	2.07743	9.41303	13.8889	8	9	2	4	6
1063	Female	Regular Work Hours	<40	16.4167	8	7.04917	21.9594	14.9103	8.35274	18.5248	1.84038	2.09746	10.1721	17.2414	32	41	7	13	24
1064	Female	Regular Work Hours	40-60	11.9833	0	5.57833	23.1167	17.5383	6.52949	20.8965	1.54872	2.06466	14.367	24.2038	25	32	3	10	17
1065	Female	Flexible Schedule	>60	12.55	1	9.05	18.9209	9.87085	9.72514	17.9559	1.07806	1.48009	8.23081	30.6604	57	83	17	37	58
1066	Female	Regular Work Hours	<40	13	2	8.33333	21.0149	12.6816	8.3122	19.1616	0.725641	1.70568	10.8494	16.6667	19	25	4	9	18
1067	Female	Flexible Schedule	>60	14.8328	6	9.98475	18.9367	8.95194	11.392	18.5819	1.60178	1.84343	7.18991	15.5172	19	30	4	13	24
1068	Female	Flexible Schedule	<40	13.1333	3	8.98333	19.1731	10.1897	9.31155	18.9522	0.444226	0.509802	9.64062	20.1954	71	96	18	40	64
1069	Female	Flexible Schedule	<40	15	7	9.17667	21.2704	12.0938	10.3101	20.0817	2.00879	2.14487	9.77157	24.4898	17	23	5	10	16
1070	Male	Flexible Schedule	40-60	13.3167	3	8.96917	20.9	11.9308	10.2417	19.0383	1.4905	2.15558	8.79667	47.7273	8	14	3	7	10
1071	Female	Flexible Schedule	40-60	12.3167	1	8.1225	17.9869	9.86443	8.72564	17.4163	0.792308	0.754017	8.69066	33.3333	37	64	12	30	47
1072	Female	Flexible Schedule	<40	15.7333	8	8.03543	22.0816	14.0461	9.21265	19.2669	1.62024	1.93265	10.0543	13.1148	25	38	5	15	26
1073	Female	Flexible Schedule	<40	14.2833	5	7.56667	23.2833	15.7167	10.5778	21.2806	1.69498	3.68329	10.7028	25.9259	26	47	8	20	37
1074	Female	Flexible Schedule	40-60	15.0167	7	8.07333	24.5005	16.4272	8.57564	21.3046	0.59359	1.73859	12.7289	13.125	39	64	9	19	40
1075	Female	Rotating Shift	<40	16.45	8	8.42417	21.2225	12.7983	9.46785	20.2926	1.20144	1.46063	10.8247	22.7545	49	88	17	40	66
1076	Female	Flexible Schedule	<40	11.1667	0	8.76315	22.4667	13.7035	9.94306	19.6829	0.940079	3.42149	9.73988	38.0368	38	60	12	26	44
1077	Male	Regular Work Hours	40-60	17.6325	9	5.17145	21.4991	16.3277	5.86045	20.0573	1.01603	1.04545	14.1968	11.0169	21	30	5	12	20
1078	Male	Long Work Hours	40-60	13.3	3	7.76064	19.7	11.9394	8.1301	18.3528	1.04325	1.19522	10.2227	15.1376	53	71	11	26	46
1079	Female	Regular Work Hours	40-60	13.3493	3	7.67583	19.4288	11.7529	8.42989	16.1423	1.47267	2.88956	7.71244	36.5385	20	27	6	12	18
1080	Female	Regular Work Hours	<40	13.5	4	6.73667	20.4018	13.6651	6.95412	18.776	0.554188	2.61607	11.8219	20.9302	35	57	11	25	43
1081	Male	Flexible Schedule	40-60	21.1736	9	9.66767	26.9528	17.2851	11.9267	24.7615	3.23413	1.70897	12.8347	15.1402	50	58	11	20	31
1082	Male	Regular Work Hours	>60	14.469	6	4.83924	23.4937	18.6545	8.12033	19.6096	3.37662	3.3149	11.4893	15.1515	23	42	12	23	34
1083	Male	Regular Work Hours	<40	14.2583	5	8.65708	19.7572	11.1001	9.75912	17.7213	1.03611	2.57866	7.96215	29.5082	15	18	3	6	12
1084	Female	Rotating Shift	<40	15.8117	8	9.95917	23.2267	13.2675	10.7058	21.7972	1.90275	2.03478	11.0914	30.5085	34	46	11	23	34
1085	Female	Flexible Schedule	<40	14.1667	5	7.35004	20.9027	13.5527	7.90659	20.5959	0.524425	0.68627	12.6893	10.9589	62	88	11	32	60
1086	Female	Regular Work Hours	40-60	12.7294	2	8.33147	21.3762	13.0447	8.99591	20.0023	1.55714	1.23218	11.0064	15.1515	42	64	10	24	44
1087	Female	Regular Work Hours	<40	13.55	4	7.83333	22.9231	15.0898	8.62656	19.4123	1.53209	1.97338	10.7858	43.8202	19	25	4	9	17
1088	Female	Rotating Shift	<40	15.0103	7	6.41667	21.5715	15.1548	9.04786	20.2379	3.15659	2.75188	11.19	22.9665	59	89	18	40	64
1089	Female	Regular Work Hours	>60	16.2985	8	9.079	21.6435	12.5645	9.56069	20.7441	0.584901	1.64331	11.1834	9.09091	52	83	12	32	57
1090	Female	Flexible Schedule	40-60	14.7058	6	10.8083	20.7804	9.97208	11.2773	19.8224	1.11927	1.93258	8.54518	17.4419	22	26	5	10	17
1091	Male	Long Work Hours	<40	11.4058	0	5.62354	19.7845	14.161	7.55657	18.3932	2.69381	1.94315	10.8366	60.7143	22	34	7	16	27
1092	Female	Flexible Schedule	40-60	16.0833	8	4.67804	17.6261	12.9481	5.03464	16.815	0.441222	1.48414	11.7803	35.2273	12	16	4	7	10
1093	Female	Regular Work Hours	40-60	14.0006	5	7.88333	20.261	12.3777	8.52661	19.1136	1.19978	1.07111	10.587	11.9205	26	57	13	27	40
1094	Female	Flexible Schedule	40-60	16.9583	9	8.48507	21.8283	13.3433	10.5032	20.3611	1.78422	1.30728	9.85783	31.1321	19	30	9	15	22
1095	Male	Regular Work Hours	<40	12.5119	1	6.5575	20.8617	14.3042	7.58545	19.9464	1.74983	1.82902	12.361	41.3793	22	30	6	12	21
1096	Female	Regular Work Hours	40-60	14.1358	5	6.26356	21.6049	15.3413	8.3815	18.8945	2.78236	2.51394	10.513	31.0811	24	48	10	21	38
1097	Female	Flexible Schedule	>60	13.0833	2	7.85083	20.1323	12.2814	9.65098	17.4898	1.78979	2.07308	7.83882	26.9231	25	35	7	17	27
1098	Female	Regular Work Hours	40-60	13.55	4	7.53042	20.5128	12.9824	9.29657	19.4952	3.12066	1.46588	10.1986	36.9048	39	56	15	32	47
1099	Male	Regular Work Hours	<40	13.5	4	6.9896	20.6367	13.6471	7.54412	17.6921	0.61202	2.43851	10.148	51.2821	11	13	3	6	10
1100	Male	Rotating Shift	<40	15.4167	7	6.995	24.2417	17.2467	9.65758	21.8803	3.35758	2.38636	12.2227	22.2222	14	18	5	8	12
1101	Female	Regular Work Hours	40-60	15.3996	7	8.08018	21.3028	13.2226	9.09194	20.8887	1.1077	1.67873	11.7967	14.3939	86	120	26	53	91
1102	Female	Regular Work Hours	<40	16.0156	8	10.9718	20.4	9.42822	11.1876	19.7853	0.460043	0.981325	8.59771	21.2389	30	45	9	19	31
1103	Female	Long Work Hours	>60	12.5	1	6.12167	20.9387	14.817	8.65923	19.7766	1.93004	1.8069	11.1173	24.812	62	94	24	48	75
1104	Male	Flexible Schedule	<40	12.7532	2	7.26875	26.6888	19.42	8.47542	18.7539	1.56931	3.81863	10.2785	33.7349	58	78	17	36	62
1105	Female	Regular Work Hours	<40	14.5583	6	8.55	22.6458	14.0958	11.7833	21.0106	3.44744	1.93717	9.22725	26.7857	29	49	13	29	41
1106	Male	Regular Work Hours	40-60	11.3531	0	5.61015	20.55	14.9398	7.54184	18.8182	2.14318	1.99242	11.2763	25.3165	36	55	11	31	46
1107	Female	Regular Work Hours	<40	15.3497	7	8.0941	19.9587	11.8646	10.1069	18.9202	2.205	1.18712	8.81323	30.6667	23	48	9	23	38
1108	Female	Regular Work Hours	40-60	12.7883	2	6.37656	19.74	13.3634	6.77982	19.1792	0.869325	0.907639	12.3994	16.1905	42	62	10	24	44
1109	Female	Regular Work Hours	<40	11.6	0	9.18333	20.5833	11.4	10.3301	19.2487	1.11746	1.82714	8.91859	34.2561	66	83	17	36	56
1110	Female	Flexible Schedule	>60	14.2353	5	8.58047	20.5581	11.9777	9.68264	18.6611	1.85657	2.33341	8.97849	28.0488	29	45	5	15	32
1111	Female	Regular Work Hours	40-60	13.65	4	11	19.5667	8.56667	11.2521	19.4298	1.35709	1.48556	8.17774	9.26829	38	60	11	24	38
1112	Female	Regular Work Hours	40-60	13.5833	4	7.49667	19.1373	11.6406	7.90325	17.7003	1.15714	2.45448	9.79706	15.7576	42	64	9	27	48
1113	Male	Flexible Schedule	<40	12.9167	2	9.38989	18.2267	8.83678	9.76125	17.5484	0.516825	0.824603	7.7871	27.7108	19	28	5	11	20
1114	Male	Flexible Schedule	40-60	11.2833	0	5.78917	18.3708	12.5817	6.62361	16.95	0.769444	0.995833	10.3264	21.0526	18	20	4	7	13
1115	Female	Rotating Shift	40-60	18.65	9	12.6467	24.0167	11.37	14.3333	22.1714	2.37564	1.60368	7.83808	34.6939	26	43	8	19	34
1116	Male	Regular Work Hours	<40	13.2667	3	6.63056	21.5302	14.8997	8.22369	20.2203	1.79429	1.92198	11.9966	32.9365	47	69	8	23	43
1117	Female	Regular Work Hours	40-60	12.6667	1	6.49656	19.6011	13.1046	7.93472	18.9345	1.16824	1.07817	10.9998	16.2791	33	42	8	18	28
1118	Male	Long Work Hours	40-60	12.9833	2	8.26667	20.0008	11.7342	10.6347	19.0778	2.42662	1.46998	8.44306	41.2281	28	48	7	18	36
1119	Female	Regular Work Hours	<40	12.9122	2	7.32265	24.1684	16.8458	9.20479	20.3363	2.39137	2.42983	11.1315	31.746	5	5	1	2	4
1120	Female	Flexible Schedule	40-60	14.5	6	6.84132	23.2532	16.4119	9.44964	22.6	2.82028	1.19008	13.1503	18.9189	32	38	6	15	26
1121	Female	Long Work Hours	<40	13.5333	4	8.1	20.25	12.15	8.60865	19.581	0.441984	1.70647	10.9724	46.2963	31	50	12	22	34
1122	Female	Long Work Hours	40-60	14.2717	5	6.52606	20.3779	13.8518	7.95611	18.8329	1.11061	1.89038	10.8768	28.0899	16	20	4	8	12
1123	Female	Regular Work Hours	<40	18.0167	9	8.645	22.7958	14.1508	9.67564	21.5654	1.77821	1.98079	11.8897	15.8879	24	40	6	17	31
1124	Male	Flexible Schedule	<40	17.655	9	8.3125	22.2635	13.951	11.8094	20.6576	1.83344	2.52817	8.84814	30	1	4	2	3	4
1125	Male	Long Work Hours	40-60	12.656	1	7	19.5207	12.5207	7.47859	18.2155	1.3901	1.88778	10.7369	38.6364	26	36	6	18	29
1126	Female	Morning Shift	<40	14.5269	6	6.78	20.9256	14.1456	9.20576	18.1076	2.16368	2.10065	8.90188	28.7879	23	33	5	13	25
1127	Female	Regular Work Hours	<40	15.0417	7	7.16667	21.1467	13.98	10.1725	19.3051	2.82775	2.06333	9.13267	35.2459	43	71	19	43	60
1128	Male	Flexible Schedule	<40	12.7992	2	8.76556	19.3663	10.6007	9.32345	17.6911	0.859067	1.91183	8.36762	31.1321	40	61	15	32	50
1129	Female	Flexible Schedule	<40	14.6226	6	7.91835	22.2267	14.3083	10.635	19.9903	2.63269	2.33039	9.35525	44.1176	31	41	8	18	32
1130	Male	Regular Work Hours	<40	12.4333	1	6.95958	17.9975	11.0379	7.75367	17.4617	1.05089	1.63198	9.70808	21.8182	9	9	1	3	6
1131	Female	Long Work Hours	>60	14.0875	5	7.41861	20.9082	13.4896	9.15412	20.2698	2.44566	1.38214	11.1157	31.6901	43	56	9	25	39
1132	Male	Regular Work Hours	40-60	12.9333	2	8.25133	21.2018	12.9505	9.88297	20.1497	1.84043	2.06521	10.2667	29.8701	17	28	5	12	21
1133	Female	Flexible Schedule	<40	14.3207	6	9.11758	22.2347	13.1171	9.90997	20.6303	0.676035	1.59131	10.7203	25	11	20	4	7	12
1134	Male	Regular Work Hours	40-60	15.0167	7	9.76835	23.3333	13.565	10.8246	19.1309	1.15208	2.65333	8.30636	31.746	38	51	12	26	41
1135	Female	Regular Work Hours	40-60	14.9192	7	7.5325	21.6593	14.1268	8.67873	19.8412	1.55897	2.52897	11.1624	28.3582	13	17	3	6	10
1136	Female	Regular Work Hours	40-60	13.3333	3	8.47806	21.7378	13.2597	9.19778	21.1406	1.192	0.619389	11.9428	24.0816	64	83	13	32	57
1137	Male	Regular Work Hours	40-60	14.9104	7	8.165	23.3571	15.1921	9.63645	21.1444	2.11901	2.58585	11.508	27.1429	31	44	8	20	34
1138	Male	Regular Work Hours	40-60	10.4917	0	6.93333	21.0767	14.1433	8.35667	17.9977	0.76	4.29569	9.64106	47.5	10	14	3	5	10
1139	Female	Regular Work Hours	40-60	14.5592	6	8.98559	22.0959	13.1103	10.4291	21.1379	2.22847	1.76036	10.7088	22.7273	59	97	21	45	76
1140	Male	Flexible Schedule	40-60	13.5167	4	7.47187	24.5419	17.07	8.1465	20.169	1.09524	2.49786	12.0225	37.9518	26	29	5	12	20
1141	Female	Rotating Shift	<40	15.25	7	10	22.2154	12.2154	10.3953	18.6395	0.660778	2.54111	8.24419	50	5	16	3	7	12
1142	Female	Flexible Schedule	40-60	14.7406	6	7.2383	19.443	12.2047	10.476	18.6197	1.90265	0.752692	8.14368	19.7674	24	49	9	23	39
1143	Female	Flexible Schedule	40-60	13.6833	4	9.94333	18.0667	8.12333	10.1025	17.3945	1.07316	1.07675	7.29201	19.5489	22	34	6	12	21
1144	Male	Long Work Hours	40-60	12.9167	2	7.02704	19.5206	12.4936	7.76614	17.7236	0.929545	1.51343	9.95745	31.746	20	36	7	17	29
1145	Male	Morning Shift	>60	16.8681	9	6.20919	20.1717	13.9625	8.50242	19.5669	3.20127	0.630952	11.0645	16.8421	26	29	6	14	22
1146	Female	Flexible Schedule	40-60	12.5	1	5.38911	19.0831	13.694	7.76489	18.1086	1.37444	1.69951	10.3437	16.9935	33	46	8	17	30
1147	Female	Regular Work Hours	40-60	13.8	4	7.05333	21.0692	14.0159	8.19006	19.4153	0.902444	3.88808	11.2252	28.9474	22	29	5	13	22
1148	Female	Regular Work Hours	>60	14.4529	6	7.48358	19.618	12.1344	8.48169	19.1917	1.3323	0.824187	10.71	15.7407	3	10	2	3	7
1149	Female	Long Work Hours	40-60	13.5507	4	6.92141	20.3879	13.4665	9.1324	19.233	2.00997	1.41348	10.1006	34.7222	31	62	18	38	53
1150	Female	Regular Work Hours	40-60	13.3803	3	7.9149	21.5833	13.6684	8.64642	20.303	0.649472	0.923611	11.6566	19.2308	25	38	4	15	29
1151	Female	Regular Work Hours	40-60	17.9167	9	8.96875	21	12.0312	9.32226	20.2792	0.808462	0.653397	10.957	15.5172	30	37	8	16	25
1152	Female	Regular Work Hours	>60	11.8667	0	5.18503	21.4181	16.2331	8.98421	19.4483	2.59979	2.26274	10.4641	33.7209	37	56	10	28	45
1153	Female	Regular Work Hours	40-60	13.7667	4	7.548	20.7233	13.1753	10.0218	19.181	2.61921	2.02699	9.15921	34.2466	32	45	8	19	34
1154	Female	Flexible Schedule	>60	11.2363	0	6.01174	18.2	12.1883	7.73746	16.976	1.30372	1.32468	9.23857	28.1818	41	61	13	29	49
1155	Female	Long Work Hours	40-60	11.925	0	7.43667	20.7631	13.3264	8.78222	17.9988	1.72978	3.38655	9.21661	32.6923	31	51	15	31	43
1156	Female	Long Work Hours	<40	14.7164	6	7.97482	19.436	11.4612	8.69477	17.4121	0.860301	1.98074	8.71734	18.1373	49	88	17	40	67
1157	Female	Regular Work Hours	40-60	11.85	0	6.8	19.1975	12.3975	7.35667	18.6348	0.749194	1.37297	11.2781	22.293	51	58	12	26	42
1158	Female	Regular Work Hours	40-60	12.75	2	7.41667	18.1525	10.7358	7.83308	18.004	0.552917	0.705648	10.1709	20.339	5	7	1	2	5
1159	Male	Flexible Schedule	<40	16.4293	8	10.1375	21.1951	11.0576	11.7818	19.0519	1.04409	1.13864	7.2701	26.3158	3	4	1	2	4
1160	Male	Regular Work Hours	40-60	16.4232	8	9.47756	22.8897	13.4121	10.4486	20.873	1.3065	1.84218	10.4244	26.087	32	43	7	14	25
1161	Female	Flexible Schedule	>60	12.85	2	8.23708	18.5	10.2629	8.02096	18.519	0.873077	1.29536	10.498	2.6455	43	52	11	23	36
1162	Female	Long Work Hours	40-60	14.25	5	9.01501	20.9838	11.9688	10.6021	19.7491	1.91786	1.78248	9.14692	17.0732	27	45	9	21	32
1163	Female	Morning Shift	40-60	12.9	2	6.87	22.8669	15.9969	7.17308	19.6473	0.701	2.69456	12.4742	33.3333	10	20	2	7	12
1164	Male	Regular Work Hours	40-60	13.1353	3	7.87924	20.8579	12.9787	8.74538	19.1242	1.29649	2.15745	10.3788	26.1261	30	42	6	15	30
1165	Female	Rotating Shift	<40	12.9833	2	7.75	21.45	13.7	8.45988	20.2492	0.936845	3.28962	11.7893	22.0077	64	93	17	41	67
1166	Male	Regular Work Hours	<40	13.8451	4	12.3356	20.7513	8.4157	12.6617	19.6968	0.508778	1.14039	7.03517	28.5714	16	23	6	11	19
1167	Female	Flexible Schedule	40-60	13.9	5	8.53333	20	11.4667	8.47109	19.05	1.01372	0.877094	10.5789	14.1844	77	107	18	41	70
1168	Male	Flexible Schedule	40-60	16.0578	8	10.5412	20.9771	10.4358	11.18	20.5135	1.62677	0.692103	9.33351	18.5714	43	63	9	22	40
1169	Male	Regular Work Hours	<40	14.3667	6	7.88333	19.0833	11.2	9.54959	18.1115	2.05199	0.648718	8.56194	20.8451	63	87	18	38	58
1170	Female	Flexible Schedule	<40	17.7015	9	9.44834	26.7833	17.335	12.4728	22.5351	3.11742	3.1025	10.0623	32.5758	48	73	16	36	59
1171	Female	Morning Shift	<40	12.5022	1	8.22042	20.2228	12.0024	9.37565	18.7812	2.05259	1.9072	9.40558	44	26	47	13	30	40
1172	Female	Flexible Schedule	40-60	13.6204	4	8.01997	20.2674	12.2475	8.77228	18.9752	0.995159	1.01335	10.203	23.5294	40	73	13	31	55
1173	Female	Regular Work Hours	<40	17.0164	9	9.37511	19.7	10.3249	9.93828	18.1732	0.325202	1.305	8.23492	40	15	18	3	6	13
1174	Female	Flexible Schedule	<40	15.2333	7	9.35333	21.7608	12.4075	11.9383	20.3087	1.52833	1.41428	8.37036	31.9149	2	4	2	3	4
1175	Male	Flexible Schedule	<40	13.9968	5	7.61905	21.6115	13.9924	7.95081	20.4098	0.971167	2.94956	12.459	10.5882	50	73	10	29	55
1176	Female	Flexible Schedule	<40	14.3667	6	10.006	21.9937	11.9877	10.8572	20.8413	1.89439	0.972071	9.98409	25	16	19	6	11	16
1177	Male	Regular Work Hours	40-60	14.7329	6	9.53	20	10.47	10.6391	18.4998	1.49206	1.30986	7.86067	34	29	42	11	21	34
1178	Male	Flexible Schedule	40-60	13.975	5	7.93302	22.7125	14.7795	9.76619	20.2507	1.99856	2.28403	10.4845	19.6429	13	21	5	10	17
1179	Female	Rotating Shift	<40	10.8011	0	7.53431	21.4599	13.9256	8.21278	17.6427	0.645778	3.69361	9.42992	29.4118	20	25	6	11	18
1180	Female	Flexible Schedule	>60	13.1583	3	7.77833	20.6333	12.855	9.56389	18.5917	0.919167	1.40769	9.02778	31.0345	33	49	11	30	42
1181	Female	Regular Work Hours	40-60	14	5	8.225	22.4665	14.2415	9.02983	20.6727	1.92885	1.73147	11.6429	17.6101	52	74	7	27	51
1182	Male	Flexible Schedule	<40	15.05	7	10.9306	19.8408	8.91028	11.302	18.9955	1.38012	1.65232	7.69349	31.7881	69	91	22	47	74
1183	Female	Regular Work Hours	<40	12.8	2	5.9	20.3976	14.4976	7.31137	19.3309	1.00153	1.3878	12.0195	18.3333	50	66	15	31	47
1184	Female	Long Work Hours	<40	15.1919	7	7.63667	22.2194	14.5828	8.36608	18.3536	1.22236	3.20561	9.9875	36.3636	14	21	4	11	17
1185	Female	Long Work Hours	<40	20.4833	9	14.3432	26.7251	12.3819	15.2211	23.4157	1.82765	2.44806	8.19462	36.0656	20	35	9	18	29
1186	Female	Regular Work Hours	<40	11.8012	0	6.60792	20.7231	14.1151	7.81579	17.7175	1.9056	2.33208	9.90176	23.913	17	18	4	8	12
1187	Male	Regular Work Hours	40-60	12.9167	2	7.57667	20.65	13.0733	8.49411	18.8905	0.930615	2.48845	10.3963	28.0899	18	28	5	11	20
1188	Female	Night Shift	40-60	16.275	8	8.38208	23.0113	14.6292	8.70641	21.3103	2.00385	3.3635	12.6038	25.6579	44	67	12	30	50
1189	Female	Flexible Schedule	<40	14.4667	6	8.9375	23.1979	14.2604	9.82746	21.6672	0.814786	2.76419	11.8397	19.2308	22	26	5	12	18
1190	Male	Flexible Schedule	40-60	16.4368	8	6.94917	20.77	13.8208	7.52141	19.8207	1.09067	1.41746	12.2993	31.25	29	40	6	15	29
1191	Female	Long Work Hours	40-60	13.1667	3	8.69904	19.4587	10.7597	9.29661	18.4901	1.11504	1.70044	9.19345	19.2308	25	60	10	24	44
1192	Female	Flexible Schedule	<40	12.9006	2	7.984	19.0306	11.0466	8.90979	18.3669	0.913248	1.46186	9.45709	29.1971	30	33	7	14	24
1193	Female	Flexible Schedule	<40	13.5583	4	8.00881	20.4138	12.405	10.0146	19.2351	2.07817	2.08008	9.22047	29.5455	10	16	3	7	13
1194	Female	Regular Work Hours	<40	14.7583	6	7.16667	21.225	14.0583	8.76134	20.3361	2.3494	1.03866	11.5748	33.9623	28	41	5	16	29
1195	Female	Rotating Shift	40-60	13.4917	4	8.16423	23.4341	15.2698	9.77533	22.0541	1.58906	1.87372	12.2788	35	11	18	4	9	14
1196	Male	Regular Work Hours	40-60	14.0803	5	11.0494	20	8.95056	11.5703	19.6404	0.683241	1.56102	8.07002	27.7778	27	34	9	17	26
1197	Female	Regular Work Hours	40-60	17.1783	9	7.56667	21.225	13.6583	10.2078	20.7912	2.60763	0.775128	10.5834	17.0213	32	49	3	15	35
1198	Female	Regular Work Hours	40-60	16.4	8	8.58521	22.5795	13.9943	10.6694	21.946	2.13639	1.74095	11.2767	13.3333	40	53	9	21	35
1199	Female	Flexible Schedule	40-60	13.6961	4	6.3625	21.4754	15.1129	7.09265	19.6535	0.915598	2.41825	12.5609	33.3333	35	49	8	22	39
1200	Male	Flexible Schedule	40-60	13.0108	2	8.01122	20.8467	12.8355	8.57148	19.503	1.1666	1.65838	10.9315	41.8301	29	32	9	16	23
1201	Male	Regular Work Hours	<40	11.2689	0	6.16688	18.4396	12.2727	6.75211	17.2368	0.752801	1.55942	10.4847	22.6415	20	30	5	10	20
1202	Female	Flexible Schedule	40-60	16.4812	8	9.05678	22.3439	13.2871	9.72741	20.8058	0.864468	2.58257	11.0784	13.0435	23	40	9	19	31
1203	Female	Long Work Hours	40-60	14.645	6	8.62725	23.2333	14.6061	10.062	21.9511	1.39949	0.675126	11.8891	33.0275	23	28	4	10	17
1204	Female	Flexible Schedule	40-60	10.0833	0	6.25	20	13.75	6.25128	16.6128	0.319231	4.3566	10.3615	25	21	23	5	10	15
1205	Female	Night Shift	<40	14.0167	5	10.189	23.7976	13.6086	11.0512	20.3684	1.67708	3.63021	9.31713	34.6667	33	46	8	22	37
1206	Male	Flexible Schedule	>60	14.7	6	8.53667	21.3633	12.8267	9.10657	19.2736	0.737778	1.99486	10.1671	34.6939	7	7	2	4	6
1207	Male	Regular Work Hours	<40	16.2869	8	7.05158	22	14.9484	8.7324	21.0857	0.931768	0.952323	12.3533	19.2308	17	31	5	14	23
1208	Female	Regular Work Hours	40-60	12.8381	2	8.01325	17.6125	9.59925	8.30258	16.298	0.697972	1.94536	7.99542	38.961	24	37	7	16	28
1209	Male	Long Work Hours	<40	13.8029	4	10.25	19.5028	9.25278	11.0428	18.2259	1.04357	1.0719	7.18306	41.5094	26	34	7	16	24
1210	Female	Flexible Schedule	40-60	11.25	0	6.28208	21.0688	14.7867	6.69784	19.368	0.869405	1.71016	12.6702	11.875	36	55	6	16	34
1211	Male	Long Work Hours	<40	15	7	8.13	21.745	13.615	9.36548	20.1952	2.07262	2.83929	10.8298	23.8095	31	57	9	22	40
1212	Female	Flexible Schedule	40-60	14.9183	7	8.77278	20.9955	12.2227	9.73901	20.5691	1.53266	1.68056	10.8301	14.5729	56	91	16	40	68
1213	Male	Regular Work Hours	>60	14.4333	6	9.46667	19.6833	10.2167	10.0384	19.4256	0.842976	0.47254	9.38722	35.0515	36	59	11	27	46
1214	Male	Flexible Schedule	<40	12.9333	2	8.96667	23.2667	14.3	9.87	22.1818	1.36333	1.9285	12.3117	25.9259	13	15	4	7	10
1215	Female	Regular Work Hours	<40	16.4333	8	11.4967	23.0083	11.5117	12.2545	20.5909	0.674242	2.30455	8.33636	15.0943	27	39	12	22	32
1216	Female	Regular Work Hours	40-60	14.4586	6	7.20389	21.25	14.0461	9.05113	19.1617	2.43201	3.03194	10.1106	43.956	17	31	7	14	21
1217	Male	Long Work Hours	40-60	14.1	5	8.575	22.5392	13.9642	9.96669	19.9039	0.813571	2.10716	9.93722	31.3869	29	37	7	15	24
1218	Male	Regular Work Hours	<40	12.4083	1	7.6826	17.8032	10.1206	9.07177	17.1809	1.42338	0.688182	8.10914	27.5862	10	15	2	3	10
1219	Male	Regular Work Hours	<40	15.925	8	7.28083	21.45	14.1692	8.8135	19.3098	2.56449	2.61009	10.4963	35.7143	22	29	6	12	20
1220	Male	Regular Work Hours	>60	13	2	7.01631	23.0607	16.0443	7.77815	21.6154	0.967381	1.14254	13.8372	20	6	7	2	3	4
1221	Female	Flexible Schedule	<40	14.3833	6	8.52	21.6801	13.1601	9.755	19.5329	1.88356	2.36303	9.77794	37.7778	19	29	5	12	22
1222	Female	Flexible Schedule	<40	12.3167	1	7.0725	21.425	14.3525	8.63616	18.5334	2.47391	2.04623	9.8972	37.069	37	48	11	25	37
1223	Male	Flexible Schedule	>60	13.1167	3	10.3139	20.35	10.0361	11.8684	18.7894	1.49149	0.859091	6.92101	34.6154	13	22	6	14	19
1224	Female	Regular Work Hours	40-60	14.1333	5	7.59715	20.955	13.3579	8.44234	18.9255	1.51111	1.88851	10.4831	26.0563	25	31	5	11	20
1225	Male	Rotating Shift	40-60	12.7167	2	9.11415	18.62	9.50586	10.2266	18.2604	1.17006	0.814194	8.03375	35.8974	22	27	8	17	23
1226	Male	Flexible Schedule	<40	13.6833	4	7.93458	21.0653	13.1307	8.52877	18.9475	0.854405	1.98159	10.4187	27.8689	8	8	2	5	7
1227	Female	Flexible Schedule	40-60	13.75	4	7.23333	21.4709	14.2376	8.00725	20.609	1.67227	1.94308	12.6017	25.7812	12	20	4	7	12
1228	Female	Flexible Schedule	<40	15.85	8	10.2308	23.3589	13.1281	11.772	21.0669	2.95198	2.46558	9.29488	30.3867	57	101	28	52	82
1229	Female	Regular Work Hours	40-60	14.45	6	6.65833	20.8	14.1417	8.92179	19.5064	3.24615	1.66139	10.5846	25.974	10	15	2	4	8
1230	Male	Flexible Schedule	40-60	14.7517	6	8.91556	21.9945	13.0789	10.3969	19.8924	1.78224	2.38605	9.49553	31.5068	25	42	8	22	34
1231	Female	Morning Shift	40-60	10.5333	0	6.5	16.9617	10.4617	7.00053	15.1107	0.764194	2.04953	8.11014	37.2881	23	37	7	17	29
1232	Male	Rotating Shift	40-60	13.3833	3	8.57	21.7617	13.1917	9.60921	19.5311	1.97632	2.23632	9.9219	11.828	31	50	11	21	38
1233	Female	Flexible Schedule	40-60	13.9833	5	8.38625	20.0354	11.6492	8.59167	19.975	0.889286	1.08929	11.3833	7.25806	46	83	14	31	52
1234	Female	Flexible Schedule	<40	13.9667	5	8.68333	20.3833	11.7	10.0243	20.4256	1.5047	0.792308	10.4014	16.9884	44	55	12	25	37
1235	Female	Flexible Schedule	>60	12.6667	1	9.83667	19.9682	10.1315	10.6381	19.2664	1.2101	0.963131	8.62836	21.519	26	45	8	17	31
1236	Female	Flexible Schedule	<40	20.5	9	10.1667	25.5544	15.3877	11.9924	22.1109	2.40152	1.83182	10.1184	35.2941	11	20	3	9	16
1237	Male	Regular Work Hours	<40	13.8047	4	5.89428	21.9222	16.0279	6.78653	20.5441	1.88877	2.21536	13.7576	11.5385	40	47	9	18	29
1238	Female	Regular Work Hours	40-60	15.4833	7	10	20.6625	10.6625	11.054	19.5488	1.93274	1.23571	8.49478	22.0339	47	74	15	34	57
1239	Female	Regular Work Hours	40-60	13.2469	3	6.08944	22.8333	16.7439	8.07667	21.8525	1.90998	1.27183	13.7758	24.1706	31	69	8	23	46
1240	Female	Regular Work Hours	<40	14.55	6	6.08333	20.0183	13.935	8.13636	17.9667	2.88295	3.06061	9.8303	36.3636	13	18	4	8	13
1241	Female	Regular Work Hours	<40	9.1	0	6.85	18.9833	12.1333	7.54487	17.7687	0.778205	2.30769	10.2238	46.5649	42	49	12	23	37
1242	Female	Long Work Hours	40-60	14.5333	6	8.59208	20.8729	12.2808	9.21159	19.75	1.48591	1.65294	10.5384	12.2137	50	60	5	21	40
1243	Female	Regular Work Hours	40-60	12.3464	1	7.4795	20.5821	13.1026	8.96182	18.8074	2.46515	2.62217	9.84563	34.5238	29	46	9	22	37
1244	Female	Regular Work Hours	40-60	14.6417	6	6.88333	22.0167	15.1333	7.62609	20.7216	0.754658	1.05167	13.0955	35.8025	17	25	5	8	17
1245	Female	Regular Work Hours	40-60	13.4667	3	9.31708	19.6013	10.2842	10.4684	18.8784	1.50833	1.78394	8.41	34.2105	18	29	10	20	26
1246	Male	Flexible Schedule	<40	13.9583	5	8.34035	23.0211	14.6808	9.9156	20.5249	1.53935	2.31981	10.6093	34.0909	19	28	6	12	20
1247	Female	Regular Work Hours	<40	13.2793	3	8.1719	21.534	13.3621	8.64906	20.7285	0.753782	2.42244	12.0795	22.5	9	11	1	3	8
1248	Male	Regular Work Hours	40-60	16.5333	8	9.85904	20.7656	10.9066	11.418	19.2523	1.51167	1.18814	7.83425	32	21	28	6	13	21
1249	Male	Long Work Hours	>60	13.725	4	6.11485	23.1518	17.037	7.09573	20.2995	1.86431	2.70893	13.2038	17.5439	36	58	12	25	42
1250	Female	Regular Work Hours	40-60	12.1679	1	5.65292	19.5083	13.8554	6.86403	18.2729	1.48759	2.30569	11.4088	54.7619	4	7	2	3	5
1251	Female	Flexible Schedule	40-60	13.7667	4	7.99083	21.3958	13.405	9.31071	19.5607	1.04167	1.92688	10.25	30.6667	24	39	7	17	28
1252	Male	Flexible Schedule	<40	13.2333	3	8.43333	21.7572	13.3239	10.1199	19.7263	1.75228	2.36306	9.60642	29.7753	34	50	13	24	35
1253	Female	Regular Work Hours	<40	16.7111	9	9.16528	21.0952	11.9299	11.2462	18.957	2.79069	1.63631	7.71085	36.2832	36	54	11	24	40
1254	Male	Regular Work Hours	<40	14.4712	6	7.10056	23.9997	16.8991	9.84479	19.6091	3.01917	2.7241	9.76427	35	29	46	11	23	37
1255	Female	Regular Work Hours	40-60	13.9381	5	9.095	22.1314	13.0364	10.5293	20.9584	1.3435	1.38376	10.4291	31.0345	10	16	3	7	12
1256	Female	Flexible Schedule	<40	12.6833	2	8.13829	19.8317	11.6934	8.53794	19.4798	0.400556	0.495992	10.9419	24.7748	35	71	11	28	49
1257	Female	Flexible Schedule	40-60	12.8125	2	7.81736	20	12.1826	8.09778	19.8305	1.69857	0.72623	11.7328	9.45946	65	91	20	36	58
1258	Male	Morning Shift	<40	17.5667	9	9.61564	23.2075	13.5919	10.2553	21.5458	1.48354	2.14699	11.2905	24.0642	36	60	10	22	38
1259	Female	Flexible Schedule	<40	14.3935	6	7.81901	20.9121	13.0931	8.44895	19.8962	1.06635	1.56768	11.4472	19.6721	41	57	11	23	43
1260	Male	Regular Work Hours	40-60	12.7033	2	6.90159	20.5027	13.6011	7.20742	19.1802	0.489266	1.60712	11.9728	11.4035	42	57	8	18	33
1261	Male	Regular Work Hours	40-60	15.2294	7	6.5	21.8446	15.3446	7.92058	20.4269	1.44754	1.56175	12.5063	11.465	49	66	12	28	48
1262	Female	Long Work Hours	<40	16.6667	8	10.1383	22.555	12.4167	11.79	20.18	2.605	3.82667	8.39	21.2766	15	23	6	12	19
1263	Female	Flexible Schedule	40-60	14.3667	6	7.544	22.1759	14.6319	8.75497	19.2957	1.91813	2.9297	10.5408	21.519	24	29	8	15	24
1264	Male	Regular Work Hours	<40	14.8167	6	8.1225	21.4258	13.3033	10.9731	20.174	1.52641	1.10278	9.2009	34.375	12	14	3	6	10
1265	Female	Long Work Hours	40-60	13.1803	3	6.11106	21.307	15.1959	6.93879	19.7401	0.972652	1.25475	12.8013	14.433	34	46	6	17	34
1266	Female	Flexible Schedule	40-60	15.2417	7	8.82861	23.9407	15.1121	10.0736	20.6729	1.04389	2.25595	10.5994	21.6981	52	83	20	41	67
1267	Male	Long Work Hours	40-60	16.975	9	8.01875	22.4167	14.3979	9.63611	20.3	2.79583	1.81368	10.6639	32.2917	29	44	10	21	33
1268	Male	Regular Work Hours	<40	12.2781	1	6.64356	19.1575	12.5139	7.2006	18.3273	0.50248	0.800496	11.1267	16.7364	43	60	10	23	39
1269	Female	Flexible Schedule	<40	14	5	9.77083	19.6667	9.89583	11.1722	18.6808	1.22902	1.26432	7.50864	32.4503	36	42	9	19	29
1270	Male	Night Shift	40-60	12.7093	2	6.19212	20.64	14.4478	9.44544	18.2962	3.13589	3.41289	8.85072	35.9375	27	37	7	16	29
1271	Male	Regular Work Hours	40-60	12.6	1	7.00365	19.5167	12.513	7.50914	19.0833	1.24282	0.681944	11.5742	21.3235	22	25	3	8	15
1272	Female	Flexible Schedule	40-60	13.2	3	9.15761	18.7967	9.63906	9.64212	17.5816	0.757735	1.14692	7.93953	26.1538	8	8	2	4	6
1273	Female	Regular Work Hours	<40	15.5558	8	8.705	21.2167	12.5117	9.47835	19.675	1.35521	1.41017	10.1966	20.7547	43	95	18	41	73
1274	Female	Flexible Schedule	<40	12.5	1	6.175	19.4	13.225	6.79131	17.7438	0.644293	1.00045	10.9525	24.7863	33	49	11	24	38
1275	Male	Flexible Schedule	<40	13.4167	3	7.655	20.8949	13.2399	9.17149	19.8113	1.96601	1.19768	10.6398	21.8045	22	33	7	14	23
1276	Female	Regular Work Hours	40-60	14.1514	5	7.79639	19.886	12.0896	9.40665	18.8732	1.14014	1.32931	9.46651	23.8938	39	58	9	27	46
1277	Female	Regular Work Hours	>60	11.6667	0	4.94058	19.7017	14.7611	6.70093	18.4373	1.96119	1.29121	11.7363	27.957	21	44	9	20	35
1278	Male	Regular Work Hours	40-60	16.3667	8	7.62833	21.2483	13.62	9.07167	18.3072	1.30008	2.06456	9.23558	23.7288	23	31	7	16	25
1279	Female	Regular Work Hours	<40	14.25	5	9.30833	22.9219	13.6136	10.3262	20.7109	1.21066	2.08649	10.3846	31.1475	29	48	11	26	40
1280	Male	Flexible Schedule	40-60	10.6167	0	6.6	15.6042	9.00417	7.365	14.3967	1.055	2.34525	7.03167	26.6667	16	23	4	10	16
1281	Female	Flexible Schedule	40-60	14.7333	6	9.07951	23.5758	14.4963	9.75698	21.2139	0.906369	3.39734	11.4569	22.5664	94	135	29	63	105
1282	Female	Long Work Hours	<40	13.5833	4	8.98708	22.5	13.5129	9.48182	21.5252	1.09164	1.56962	12.0434	21.4286	49	82	15	37	64
1283	Male	Flexible Schedule	<40	13.7772	4	10.3508	22.8989	12.5481	11.9155	19.2543	0.909823	2.16624	7.33886	18.8172	35	50	10	20	33
1284	Female	Flexible Schedule	<40	13.7125	4	5.95921	21.8887	15.9295	7.54595	19.8629	2.28868	2.29218	12.3169	27.5	1	2	1	2	2
1285	Female	Regular Work Hours	40-60	13.6036	4	10.9488	20.0333	9.08453	11.2426	18.206	0.745235	0.864701	6.96335	28.75	35	60	13	26	43
1286	Female	Flexible Schedule	<40	13.1762	3	8.65583	20.4814	11.8256	9.25083	19.0935	0.860361	1.83272	9.84269	41.8182	14	16	3	6	9
1287	Female	Flexible Schedule	40-60	18	9	11.0456	21.652	10.6064	12.0712	19.9574	1.41727	0.826829	7.88618	19.697	22	31	5	12	24
1288	Female	Regular Work Hours	<40	11.6083	0	6.64	21.245	14.605	8.18655	20.2026	1.00476	1.66962	12.016	29.0323	32	47	8	21	36
1289	Female	Regular Work Hours	40-60	10.9781	0	4.52847	18.0183	13.4899	6.0471	17.2445	1.92096	1.8049	11.1974	27.2727	30	44	7	19	34
1290	Female	Flexible Schedule	>60	11.7819	0	7.5434	19.7376	12.1942	8.31524	18.6274	1.40784	1.42397	10.3122	20.8791	38	57	13	27	44
1291	Male	Rotating Shift	<40	14.9515	7	8.78958	22.83	14.0405	9.96904	21.2216	1.93086	3.04944	11.2526	15.1786	46	57	14	28	43
1292	Male	Regular Work Hours	<40	13.1083	3	6.6475	22.1833	15.5358	7.08229	20.8461	1.25088	1.89579	13.7638	18.8889	30	43	6	13	24
1293	Male	Evening Shift	40-60	15.8507	8	7.13104	21.6458	14.5147	8.58105	20.3287	0.970556	2.01677	11.7476	18.5484	34	49	9	19	34
1294	Female	Flexible Schedule	<40	12.75	2	7.34564	19.2161	11.8705	8.79302	18.5475	0.829325	0.841488	9.75446	20	4	5	2	4	5
1295	Female	Flexible Schedule	<40	16.4667	8	13.0361	21.2643	8.22822	13.9763	20.2591	1.31661	0.781028	6.28289	24.7059	17	22	3	8	14
1296	Male	Regular Work Hours	40-60	12.6333	1	10.0167	19.1667	9.15	10.9228	19.0714	1.69274	1.13654	8.14861	10.8014	38	61	11	21	35
1297	Female	Morning Shift	>60	12.8167	2	5.59708	17.4696	11.8725	6.74643	16.8488	1.6631	0.99127	10.1024	22.7273	41	54	4	13	28
1298	Female	Flexible Schedule	>60	14.9642	7	8.48333	24.5786	16.0953	11.1089	21.0242	2.50414	3.68975	9.91533	30	25	34	8	15	23
1299	Female	Rotating Shift	40-60	14.3167	6	7.08333	25.9561	18.8728	7.41109	20.8378	1.49905	2.24851	13.4267	18.9369	71	112	19	48	79
1300	Male	Regular Work Hours	40-60	12.65	1	12.0167	19.5325	7.51583	12.424	18.938	0.797821	0.403355	6.51393	47.5806	25	45	7	17	33
1301	Male	Flexible Schedule	40-60	13.0281	2	8.69626	21.2611	12.5648	10.1584	19.2055	1.42402	2.97763	9.04705	32.5581	17	24	5	11	18
1302	Female	Flexible Schedule	<40	16.0583	8	10.5	22.204	11.704	11.9599	21.6076	1.40621	1.45778	9.64762	21.3333	47	71	13	30	54
1303	Male	Flexible Schedule	40-60	20.2333	9	13.3683	25.2398	11.8715	13.8312	24.2413	0.471825	0.974167	10.41	22.4	28	38	9	16	25
1304	Male	Rotating Shift	40-60	14.55	6	7.525	20.9	13.375	8.30706	18.7491	1.12095	1.59773	10.442	19.1729	48	79	12	28	49
1305	Female	Long Work Hours	40-60	14.6412	6	7.09987	20.9979	13.898	7.82769	18.0942	1.04514	2.09086	10.2665	32.7586	26	43	10	24	36
1306	Female	Regular Work Hours	<40	13.9622	5	7	20	13	7.43094	18.9356	0.668376	1.40647	11.5046	12.3711	66	108	14	41	81
1307	Female	Flexible Schedule	<40	14.25	5	9.57858	20.3895	10.8109	9.94744	18.376	0.528504	1.41474	8.42859	22.3077	32	56	13	27	43
1308	Male	Long Work Hours	40-60	14.9	7	9.2911	22.8817	13.5906	9.78028	17.7124	0.920101	2.50116	7.93217	26.5823	19	26	5	11	18
1309	Male	Regular Work Hours	40-60	13.25	3	7.28897	19.9667	12.6777	9.67437	18.7574	2.30476	1.84603	9.08306	28.4615	26	37	8	16	25
1310	Male	Long Work Hours	40-60	15.1167	7	7.79	22.3299	14.5399	8.51667	21.4992	1.23214	2.14448	12.9826	15.3846	22	32	4	10	18
1311	Male	Morning Shift	<40	11.9167	0	6.37944	16.8555	10.476	7.5097	16.0029	0.741709	1.45237	8.49316	32.3944	33	51	11	24	39
1312	Male	Regular Work Hours	40-60	14.4465	6	9.00231	21.0275	12.0252	9.03701	20.8647	0.48	1.29844	11.8277	6.83761	36	51	8	15	29
1313	Female	Flexible Schedule	<40	13.4333	3	8.76417	24.3183	15.5542	10.3719	20.8711	0.886263	1.90919	10.4991	27.8261	34	47	10	22	35
1314	Male	Rotating Shift	<40	15.8333	8	8.54458	21.4642	12.9196	10.509	20.6154	2.2256	1.06722	10.1064	24.3056	39	54	12	26	39
1315	Female	Flexible Schedule	40-60	15.65	8	8.3	20.3049	12.0049	9.3179	19.7708	1.5503	0.971894	10.4529	13.2867	69	98	20	48	78
1316	Male	Regular Work Hours	<40	9.65	0	6.69332	19.4983	12.805	7.69136	18.3522	0.754571	1.76341	10.6608	27.907	3	3	1	1	2
1317	Female	Morning Shift	<40	14.0492	5	7.67833	22.7	15.0217	8.7044	21.918	1.65228	2.04071	13.2136	10.8491	60	80	14	34	54
1318	Female	Regular Work Hours	40-60	14.8775	7	6.38667	22.8758	16.4891	7.21588	20.9865	1.04771	1.93815	13.7706	16.8	57	72	9	29	55
1319	Female	Regular Work Hours	<40	15.5	7	8.62156	24.4335	15.812	10.236	21.2469	2.50577	2.67857	11.0109	18.9474	36	61	14	33	50
1320	Female	Flexible Schedule	>60	16.1167	8	6.84002	17.75	10.91	8.00861	16.8477	1.53852	0.48544	8.83905	29.3333	30	34	7	13	21
1321	Male	Regular Work Hours	<40	17.85	9	8.90511	20.1608	11.2557	10.5915	19.1151	3.01983	2.57075	8.52358	15.3846	68	81	17	36	60
1322	Female	Flexible Schedule	>60	13.7833	4	6.15958	20.2188	14.0592	6.4906	19.1165	0.851349	1.14548	12.6259	19.2308	25	39	5	12	23
1323	Female	Flexible Schedule	<40	12.85	2	7.83024	19.7862	11.956	8.08071	18.692	0.428373	1.53782	10.6113	19.0141	50	78	15	36	60
1324	Female	Flexible Schedule	40-60	14.5167	6	6.73753	24.9111	18.1736	9.32881	20.1654	2.22056	2.94025	10.8365	32.3308	18	21	4	8	14
1325	Female	Long Work Hours	<40	14.4	6	8.83068	19.7817	10.951	9.74122	18.0943	0.863077	2.05137	8.35306	41.8182	12	12	2	4	7
1326	Female	Flexible Schedule	<40	11.9274	0	6.51174	24.0883	17.5766	7.10225	19.0723	0.926204	3.24722	11.97	27.9412	5	7	1	2	3
1327	Female	Morning Shift	40-60	14.1833	5	5.62875	21.3833	15.7546	7.10571	19.5456	0.878205	1.05154	12.4399	22.6667	53	79	13	31	53
1328	Female	Long Work Hours	>60	15.9	8	8.58458	21.9124	13.3279	9.1703	20.8069	1.28795	1.56893	11.6366	15.5738	25	45	6	16	31
1329	Male	Regular Work Hours	<40	12.5	1	7.36417	19.7959	12.4317	8.25509	18.637	0.98544	1.88299	10.3819	59.4595	32	43	9	20	32
1330	Male	Morning Shift	40-60	12.7868	2	4.38266	19.3536	14.971	4.62367	18.2879	0.448115	0.825159	13.6642	25.2874	33	54	9	21	37
1331	Female	Flexible Schedule	40-60	15.5663	8	6.06412	22.0653	16.0012	9.07942	20.2934	1.58444	2.59405	11.214	32.4324	20	27	4	7	17
1332	Female	Flexible Schedule	<40	17.8925	9	9.88374	23.8705	13.9868	12.151	22.5509	2.12218	1.4338	10.3999	26.3158	31	36	8	16	25
1333	Female	Flexible Schedule	<40	13.5981	4	9.15	21.5129	12.3629	10.1091	19.6502	1.55093	2.60083	9.54111	38.8889	20	23	6	11	17
1334	Male	Regular Work Hours	<40	13.0833	2	7.53333	19.86	12.3267	8.95044	19.0415	2.01369	1.77988	10.091	33.3333	12	12	3	6	10
1335	Female	Rotating Shift	<40	17.7024	9	9.69026	24.4391	14.7488	11.9606	21.6046	2.30414	2.6926	9.64399	30	26	36	8	17	29
1336	Female	Regular Work Hours	40-60	12.9667	2	7.44069	20.3492	12.9085	9.3651	19.4957	1.50526	1.4978	10.1306	29.6296	40	53	11	22	36
1337	Male	Flexible Schedule	40-60	10.9167	0	7.91833	21.7483	13.83	9.12692	19.2423	2.04028	2.18077	10.1154	46.5909	9	9	1	2	4
1338	Female	Flexible Schedule	<40	12.8381	2	8.43583	19.909	11.4732	9.01629	17.9842	0.877828	2.44884	8.96793	47.9452	22	30	7	13	23
1339	Male	Regular Work Hours	40-60	16.2833	8	9.21667	20.6833	11.4667	11.5609	18.9062	2.16344	1.86689	7.34531	27.8689	36	48	11	22	38
1340	Male	Regular Work Hours	40-60	13.7982	4	8.62917	20.2388	11.6096	9.14058	19.383	0.811505	0.880694	10.2424	15.9722	27	45	9	20	31
1341	Female	Regular Work Hours	40-60	13.0833	2	7.1525	20.0385	12.886	7.57942	18.8656	0.647877	1.62484	11.2862	19.5122	40	57	9	26	43
1342	Female	Flexible Schedule	<40	16.5822	8	7.75611	21.8833	14.1272	9.93398	20.9507	3.00718	1.14162	11.0167	18.4426	43	65	11	24	41
1343	Female	Long Work Hours	40-60	15.5	7	9.86608	21.0625	11.1964	10.1799	18.4266	1.56065	2.22456	8.24674	19.8864	41	54	12	25	38
1344	Female	Flexible Schedule	40-60	12.2486	1	6.09086	17.8283	11.7375	6.96479	16.9409	1.33449	1.7309	9.97615	22.8669	46	69	8	21	43
1345	Female	Flexible Schedule	40-60	18.1667	9	9.88278	20.7551	10.8723	10.3052	20.1955	0.725278	1.5453	9.89032	18.2648	59	88	15	34	60
1346	Male	Regular Work Hours	<40	14.45	6	9.26667	21.95	12.6833	9.58763	20.7038	0.702564	1.4447	11.1161	26.4	39	59	8	25	46
1347	Male	Flexible Schedule	<40	14.6333	6	5.41667	20.7039	15.2872	5.82466	18.8381	0.937579	1.49488	13.0134	18.7845	41	65	10	24	45
1348	Female	Regular Work Hours	40-60	12.25	1	6.83583	18.5167	11.6808	9.92833	17.9017	2.70667	1.52667	7.97333	27	37	42	8	20	32
1349	Female	Flexible Schedule	<40	12.5	1	8.00282	18.7354	10.7326	7.945	17.2283	0.623889	1.36283	9.28328	18.1818	24	30	6	12	19
1350	Female	Flexible Schedule	40-60	15.2547	7	9.50917	20.4209	10.9117	10.8686	19.8072	1.06026	0.997244	8.93853	25.4545	39	51	13	25	40
1351	Female	Flexible Schedule	<40	15	7	7.5	27.7753	20.2753	10.6514	22.2359	2.21878	3.02172	11.5846	36.1446	32	47	13	25	39
1352	Female	Regular Work Hours	40-60	14.2156	5	7.15	21.02	13.87	8.31754	20.0948	1.30569	2.08494	11.7772	21.2389	46	82	19	46	68
1353	Female	Regular Work Hours	>60	13.7092	4	8.4334	20.988	12.5545	9.42115	19.7181	1.80064	1.12859	10.297	18.254	34	67	14	30	52
1354	Female	Regular Work Hours	<40	10.6242	0	7.45	20.7914	13.3414	7.98726	18.8	0.645641	1.0341	10.8127	38.2812	41	57	11	22	40
1355	Female	Regular Work Hours	<40	13	2	7.21667	20.2667	13.05	9.21998	19.0662	1.97241	1.69594	9.84618	38.9474	50	72	17	33	51
1356	Male	Regular Work Hours	<40	12.3833	1	7.00056	18.9006	11.9	7.95625	18.3455	1.20724	1.71119	10.3892	30.6977	43	61	9	23	40
1357	Female	Flexible Schedule	<40	10.4875	0	6.75	19.3559	12.6059	8.52081	17.6656	1.13914	1.88718	9.14479	27.8846	18	29	5	10	19
1358	Male	Regular Work Hours	40-60	13.7479	4	8.09972	21.5	13.4003	9.76621	20.4707	1.78702	1.705	10.7045	30.9091	26	47	10	22	37
1359	Female	Regular Work Hours	40-60	15.044	7	8.16667	26.9667	18.8	9.13622	22.3466	1.12188	2.92474	13.2104	21.134	32	62	10	24	41
1360	Female	Flexible Schedule	<40	15.1017	7	9.455	22.0479	12.5929	10.388	20.4065	1.59782	1.86692	10.0186	21.7391	26	43	8	18	31
1361	Female	Flexible Schedule	40-60	13.15	3	6.56667	21.1167	14.55	7.72579	20.125	1.68675	1.01155	12.3992	19.7492	49	64	13	24	38
1362	Male	Long Work Hours	40-60	13.25	3	7.5	21.9167	14.4167	10.7596	19.8894	2.17747	2.84544	9.12978	34	46	77	20	37	55
1363	Female	Flexible Schedule	40-60	14.7628	6	8.05095	20.916	12.865	9.72922	19.4711	0.589944	0.9875	9.74192	27.2727	28	35	6	13	24
1364	Female	Long Work Hours	<40	12.65	1	6.27722	20.7261	14.4488	8.53153	18.1264	2.65992	3.31028	9.59492	26.3636	27	36	9	16	24
1365	Female	Flexible Schedule	40-60	13.2571	3	6.71192	18.2303	11.5184	6.92367	17.8407	1.05706	0.364206	10.9171	12.5	48	68	12	27	49
1366	Female	Evening Shift	<40	13.7167	4	8.37192	21.46	13.0881	8.64706	20.1203	0.371548	1.67925	11.4733	22.0779	24	31	3	12	23
1367	Female	Flexible Schedule	40-60	14.9167	7	8.08125	21.5346	13.4533	9.03073	20.2673	1.43333	2.25742	11.2366	13.8158	32	44	7	15	27
1368	Male	Morning Shift	40-60	12.9	2	7.46667	23.5667	16.1	8.87308	18.1679	1.75897	3.25128	9.29487	23.6486	42	74	18	34	58
1369	Male	Regular Work Hours	<40	15.6667	8	7.24917	23.5519	16.3028	7.92859	21.9074	0.861389	1.40327	13.9788	18.8679	25	37	5	12	22
1370	Female	Regular Work Hours	40-60	17.1372	9	7.1425	22.1325	14.99	8.93972	21.4827	0.814901	2.48911	12.543	14.7541	54	70	13	31	50
1371	Female	Regular Work Hours	40-60	13.489	4	8.17718	21.7305	13.5534	8.43907	18.4195	1.14409	3.66746	9.98044	17.7778	16	22	2	7	15
1372	Male	Regular Work Hours	40-60	13.6594	4	10.1167	21.659	11.5423	11.0714	20.3496	2.49396	2.63699	9.27815	15.873	19	42	7	18	29
1373	Male	Flexible Schedule	40-60	12.4167	1	7.77544	20.1446	12.3692	8.41228	17.6092	0.954556	2.47175	9.19697	36.9863	31	37	7	18	29
1374	Female	Regular Work Hours	40-60	12.5	1	8.09417	19.7183	11.6242	8.64882	18.5208	1.04208	1.45248	9.87201	22.0513	34	63	11	26	44
1375	Male	Flexible Schedule	40-60	17.5333	9	7.36042	20.3783	13.0179	10.6205	19.2705	3.43974	1.0859	8.65	31.4815	13	13	4	7	10
1376	Male	Flexible Schedule	>60	13.7833	4	8.02167	20.5837	12.5621	9.62139	19.7077	1.67239	1.85385	10.0863	31.6667	49	68	12	30	53
1377	Female	Flexible Schedule	<40	13.2667	3	7	21.3617	14.3617	8.42563	19.5927	2.52801	2.44967	11.167	42.7948	28	30	6	12	19
1378	Female	Flexible Schedule	<40	15.5333	8	9.36667	22.8625	13.4958	10.3269	21.6141	1.66152	2.07331	11.2872	17.9245	48	76	13	33	59
1379	Female	Regular Work Hours	40-60	12.6389	1	7.61464	20.05	12.4354	9.15843	19.1294	1.34146	1.42185	9.97102	32.7273	31	44	6	18	34
1380	Female	Regular Work Hours	<40	14.9333	7	6.26167	24.3338	18.0722	8.7476	19.019	2.31319	4.44339	10.2714	42.3729	5	6	3	4	6
1381	Female	Regular Work Hours	40-60	11.6046	0	7.63122	18.522	10.8908	8.76898	17.3167	1.04606	1.43981	8.54773	52.0833	14	17	5	9	13
1382	Female	Flexible Schedule	40-60	13.5667	4	9.6375	19	9.3625	10.5095	18.3703	1.02054	0.910317	7.86083	27.1493	64	104	21	48	75
1383	Male	Flexible Schedule	<40	13.7167	4	7.54583	22.8104	15.2646	9.60127	19.4662	2.99788	3.6472	9.8649	48.3333	19	32	8	17	26
1384	Female	Flexible Schedule	<40	16.75	9	11.9	20.4333	8.53333	12.345	19.9403	0.841667	0.541389	7.59531	28.2759	20	37	7	16	26
1385	Female	Regular Work Hours	40-60	12	0	6.45851	19.9719	13.5134	7.24167	17.0698	1.06227	2.85426	9.82815	42.1687	25	38	7	18	30
1386	Male	Flexible Schedule	<40	12.9235	2	7.8	21.2782	13.4782	9.74667	20.2951	1.45232	0.964646	10.5484	26.8657	25	30	4	8	16
1387	Female	Flexible Schedule	40-60	14.6639	6	7.18736	18.9566	11.7693	8.10429	17.4711	1.66432	2.0035	9.36677	27.4074	36	59	8	24	45
1388	Male	Long Work Hours	40-60	19.55	9	9.86667	22.4033	12.5367	11.7715	21.221	2.35348	1.55338	9.44952	24.7934	31	51	10	23	40
1389	Female	Flexible Schedule	40-60	13.8667	4	8.41667	18.65	10.2333	8.18534	18.2214	1.10548	0.574583	10.0361	8.09249	88	134	23	47	80
1390	Female	Regular Work Hours	40-60	16.3517	8	8.79141	21.3525	12.561	9.8206	20.0665	2.24327	2.12637	10.2459	14.5349	38	54	12	25	36
1391	Male	Long Work Hours	40-60	10.6333	0	5.6975	21.6025	15.905	7.61389	19.5827	3.35951	1.98956	11.9688	32.5	14	26	4	9	18
1392	Female	Regular Work Hours	40-60	12.4167	1	7.06667	19.3167	12.25	7.93192	19.055	0.841131	1.9981	11.1231	20.1183	69	90	23	43	71
1393	Female	Flexible Schedule	>60	14.1167	5	7.13333	21.6882	14.5549	8.65519	20.3487	0.769468	2.25046	11.6936	29.2308	60	83	14	39	66
1394	Female	Regular Work Hours	<40	12.5831	1	7.95083	19.7769	11.8261	8.55038	19.5026	0.412738	1.40004	10.9522	11.7021	49	64	13	29	44
1395	Male	Regular Work Hours	>60	12.6167	1	8.11289	17.452	9.33911	8.54321	16.9866	0.492063	0.656587	8.44335	31.3725	31	39	10	19	27
1396	Female	Regular Work Hours	>60	13.2637	3	4.75502	21.6802	16.9251	5.57534	20.63	1.59333	4.83617	15.0546	11.039	48	60	9	21	40
1397	Male	Flexible Schedule	<40	12.8536	2	7.84983	21.3203	13.4705	8.44961	19.5257	1.74961	2.56097	11.0761	32.6087	56	69	14	32	54
1398	Male	Regular Work Hours	40-60	12.5667	1	8.375	20.4417	12.0667	9.24848	19.4621	0.481818	1.31515	10.2136	18.8119	19	29	6	10	16
1399	Female	Regular Work Hours	<40	12.3519	1	8.25778	20.125	11.8672	9.19596	18.2721	1.29914	2.0046	9.07611	19.7531	15	26	5	12	19
1400	Male	Regular Work Hours	<40	19.3411	9	8.01194	24.0133	16.0014	9.74476	22.7878	1.85021	1.98568	13.043	16.8478	46	65	12	26	45
1401	Female	Long Work Hours	40-60	13.5	4	9.14317	20	10.8568	9.47946	19.2261	0.543651	1.89905	9.74667	31.6	53	90	10	30	56
1402	Female	Regular Work Hours	40-60	14.6339	6	7.08833	22.6813	15.593	8.65425	20.2575	1.81966	3.65504	11.6032	39.7849	26	35	7	17	26
1403	Male	Flexible Schedule	<40	13.0667	2	7.35	20.9908	13.6408	7.96514	19.4032	0.847176	2.03023	11.4381	22.4719	16	23	5	10	15
1404	Male	Regular Work Hours	<40	14.15	5	8.36045	20.2167	11.8562	8.97163	20.7227	0.478849	1.25601	11.751	13.9918	56	77	11	25	40
1405	Female	Long Work Hours	40-60	13.0011	2	7.02115	19.5809	12.5597	8.04613	19.4013	1.65464	1.2905	11.3551	21.2	68	102	19	43	74
1406	Male	Regular Work Hours	40-60	11.8083	0	5.52833	19.8821	14.3537	6.72081	18.7501	1.63636	1.91838	12.0293	60.5263	26	36	9	17	27
1407	Male	Regular Work Hours	<40	11.8833	0	6.73	17.5367	10.8067	7.76038	17.2081	0.868095	0.489286	9.4477	11.7647	21	25	6	11	15
1408	Male	Regular Work Hours	40-60	12.3154	1	7.25306	18.3403	11.0872	7.70494	17.4063	0.785099	1.92381	9.70135	22.2222	43	45	8	20	32
1409	Female	Regular Work Hours	<40	12.15	1	5.69653	22.2721	16.5756	7.08169	20.076	1.854	1.7962	12.9944	14.8936	27	32	4	10	19
1410	Female	Morning Shift	40-60	15.1503	7	7.51583	22.0292	14.5134	9.9512	20.033	2.2075	1.89708	10.0818	40.5405	12	28	7	14	21
1411	Female	Regular Work Hours	<40	12.7993	2	8.03806	17.305	9.26694	9.51715	16.6493	0.955139	1.13553	7.13213	42	12	12	2	4	8
1412	Female	Regular Work Hours	<40	12.7622	2	5.71173	21.6	15.8883	7.13006	16.7695	2.34979	1.87526	9.63947	23.7288	35	61	14	29	48
1413	Male	Long Work Hours	<40	10.1	0	4.11361	17.7078	13.5942	5.26283	16.1756	1.74675	4.45406	10.9128	34.4262	19	30	3	14	24
1414	Male	Flexible Schedule	<40	11.55	0	5.15	21.7683	16.6183	8.88028	18.9162	2.36164	1.99458	10.0359	20.3488	18	30	6	11	18
1415	Female	Regular Work Hours	40-60	13.7	4	7.31875	21.4167	14.0979	8.43951	19.4621	1.46942	1.85618	11.0226	27.9221	39	81	17	41	65
1416	Female	Flexible Schedule	40-60	15.4974	7	8.06531	21.6667	13.6014	8.2244	20.7683	0.948413	1.41129	12.5438	9.74576	67	112	18	43	76
1417	Female	Flexible Schedule	>60	13.3353	3	8.25778	20.0153	11.7575	8.95148	18.8088	0.825463	1.16171	9.85729	20.3209	36	58	10	22	40
1418	Female	Flexible Schedule	<40	14.1167	5	9.48333	20.8333	11.35	10.0229	21.0195	1.30776	1.23019	10.9966	16.6189	61	99	18	38	63
1419	Female	Flexible Schedule	<40	14.1333	5	7.41333	21.3667	13.9533	8.46548	19.669	1.22964	1.55952	11.2036	27.3224	30	44	9	17	29
1420	Female	Regular Work Hours	<40	14.8083	6	8.46207	21.4183	12.9563	9.15412	19.6971	1.19616	2.29009	10.543	19.7917	41	54	5	17	32
1421	Female	Regular Work Hours	<40	12.9422	2	7.48333	20.9133	13.43	8.15865	20.3495	0.942619	1.13877	12.1909	24.8	28	50	7	20	35
1422	Male	Long Work Hours	<40	15.1667	7	8.70925	21.9918	13.2825	10.2457	19.3112	1.39287	2.1806	9.06546	20.9302	16	21	4	7	14
1423	Male	Flexible Schedule	<40	17.4667	9	10.1417	20.3333	10.1916	10.7245	18.1197	0.708535	0.812121	7.39518	23.8806	36	52	12	31	44
1424	Female	Flexible Schedule	<40	14.0164	5	8.49103	20.2522	11.7612	8.93992	19.4271	0.517929	2.33404	10.4871	20	17	28	5	11	19
1425	Female	Flexible Schedule	40-60	11.9	0	6.95965	19.7809	12.8212	8.57571	18.6269	1.73171	1.17974	10.0512	31.1321	46	62	15	31	50
1426	Male	Regular Work Hours	<40	13.6833	4	7.94583	22.3167	14.3708	10.7152	20.7833	2.18232	2.42273	10.0682	39.4366	25	28	5	12	21
1427	Male	Flexible Schedule	40-60	13.6833	4	8.25167	22.5445	14.2928	8.855	18.972	0.583472	3.22176	10.117	40	28	47	12	25	36
1428	Female	Flexible Schedule	40-60	8.43333	0	7.77167	22.0116	14.2399	8.11506	16.7476	0.226239	2.48118	8.63252	41.3534	28	44	7	17	31
1429	Female	Flexible Schedule	40-60	15.1	7	9.7875	20.2833	10.4958	11.1244	18.841	2.07692	1.5487	7.71667	17.4757	43	72	12	32	56
1430	Female	Regular Work Hours	40-60	12.2833	1	5.92246	19.9658	14.0433	6.99368	19.347	1.55487	1.28526	12.3533	23.8806	46	80	19	42	65
1431	Female	Flexible Schedule	40-60	12.3833	1	7.58333	19.7358	12.1525	8.95694	18.9901	1.22179	2.16623	10.0331	29.1925	43	68	9	26	49
1432	Male	Long Work Hours	40-60	15.675	8	4.99083	20.9	15.9092	6.39296	18.7769	1.82917	1.11602	12.3839	31.4286	24	28	6	12	20
1433	Female	Flexible Schedule	>60	14.2369	5	6.45176	20.9887	14.537	7.68523	18.5542	2.00563	1.68477	10.869	26.6667	41	59	11	26	44
1434	Female	Morning Shift	>60	13.2386	3	6.88133	19.5	12.6187	8.27083	18.0985	1.87758	1.42508	9.82769	23.1579	29	60	14	30	48
1435	Female	Regular Work Hours	<40	13.9954	5	7.95468	20.0089	12.0543	9.23861	18.485	1.50542	1.70352	9.24641	30.8824	26	40	6	16	30
1436	Female	Flexible Schedule	40-60	13.0164	2	5.01667	18.9833	13.9667	5.391	18.3038	1.05366	0.551551	12.9128	29.703	39	59	11	26	46
1437	Female	Regular Work Hours	40-60	12.7	2	7.01042	18.9875	11.9771	7.66851	18.8662	0.298333	1.32825	11.1977	9.61538	48	65	13	28	45
1438	Male	Regular Work Hours	40-60	11.3206	0	6.85833	19.6897	12.8314	7.50081	18.5391	0.568631	1.418	11.0383	26.9231	52	69	9	28	53
1439	Female	Flexible Schedule	<40	13.3917	3	8.73958	22.3167	13.5771	9.80212	21.4787	1.69752	2.65696	11.6765	14.7727	68	86	14	35	59
1440	Female	Long Work Hours	<40	14.3885	6	8.43208	18.9608	10.5288	9.58939	18.1524	1.28636	1.67086	8.56306	42.5	19	28	5	11	18
1441	Male	Regular Work Hours	40-60	12.4333	1	6.35417	19.2479	12.8938	7.65778	16.7729	1.92838	1.9003	9.11513	28.7879	24	31	6	12	22
1442	Female	Regular Work Hours	40-60	12.5833	1	7.17417	21.0596	13.8854	8.10647	20.6649	1.32718	1.63235	12.5584	7.77778	28	41	7	15	24
1443	Male	Flexible Schedule	<40	10.0176	0	7.71292	20.3833	12.6704	8.73947	18.7245	1.48021	1.72848	9.98506	53.9216	17	35	8	16	26
1444	Male	Regular Work Hours	<40	14.0167	5	10	18.9467	8.94667	11.075	18.194	1.43623	0.827718	7.11905	25.8065	28	37	5	15	27
1445	Male	Evening Shift	<40	19	9	8	25.7913	17.7913	9.17442	24.2651	3.37925	1.6778	15.0907	16.3636	37	57	11	24	39
1446	Female	Flexible Schedule	40-60	16.2476	8	7.2075	19.9598	12.7523	7.3596	19.2659	0.752421	0.838948	11.9063	11.7647	57	79	13	33	59
1447	Female	Regular Work Hours	<40	12.6764	2	6.28361	20.8243	14.5407	7.13137	19.4175	0.903932	2.26301	12.2861	23.7624	39	60	11	24	45
1448	Female	Regular Work Hours	40-60	12.8417	2	6.8914	19.8887	12.9973	8.0298	18.0184	1.16252	1.14056	9.98857	17.0588	50	75	17	38	57
1449	Female	Flexible Schedule	<40	14.2406	5	7.94221	18.9539	11.0117	8.86671	17.5399	1.5387	0.733547	8.67314	24.0964	31	61	13	31	49
1450	Female	Rotating Shift	>60	16.5	8	8.29375	22.4125	14.1188	9.59692	20.3814	2.24477	2.56704	10.7844	14.5455	21	23	5	11	16
1451	Female	Regular Work Hours	40-60	13.131	3	7.16792	19.7878	12.6199	8.4365	19.1172	2.28881	0.993833	10.6807	31.8182	16	29	6	14	23
1452	Female	Flexible Schedule	>60	13.6833	4	8.61167	22.2052	13.5935	8.98571	18.7315	0.559901	2.90716	9.74577	20	31	50	10	22	38
1453	Male	Regular Work Hours	<40	17.0978	9	5.48793	23.8988	18.4109	7.04662	21.3171	1.60949	3.12323	14.2705	31.8182	20	28	3	10	19
1454	Male	Regular Work Hours	40-60	13.0075	2	7.01639	20.4833	13.4669	8.74931	18.3788	1.82147	2.3325	9.62944	41.1765	23	32	6	15	23
1455	Female	Regular Work Hours	40-60	13.4667	3	7.2381	22.3292	15.0911	8.30488	19.1431	1.2501	4.01829	10.8382	29.8077	38	51	7	20	33
1456	Female	Regular Work Hours	40-60	13.3417	3	7.9	20.3333	12.4333	8.12857	19.7442	0.752381	1.2446	11.6156	16.3551	51	102	21	47	77
1457	Male	Flexible Schedule	40-60	12	0	6.2	20.2488	14.0488	6.70886	18.3981	0.719167	2.01372	11.6892	34.6939	5	5	2	4	5
1458	Male	Flexible Schedule	>60	14.65	6	8.16692	18.2976	10.1306	8.7527	18.1995	0.567302	2.13613	9.44683	13.9932	61	76	14	31	48
1459	Female	Flexible Schedule	<40	12.3794	1	7.62583	20.0223	12.3964	9.14685	17.352	1.12619	3.65621	8.20518	32.2034	15	25	6	15	21
1460	Female	Regular Work Hours	<40	13.8	4	8.95667	20.4667	11.51	9.638	19.5515	0.788095	2.27504	9.91347	14.4828	54	79	15	33	53
1461	Male	Long Work Hours	<40	12.5	1	6.59257	20.0309	13.4383	6.90585	19.5048	0.406068	0.784957	12.5989	31.6456	1	1	1	1	1
1462	Male	Regular Work Hours	<40	15.4857	7	10.1206	20.9425	10.8219	11.0492	20.1787	1.02694	0.591444	9.12947	38.6364	22	32	8	15	25
1463	Female	Rotating Shift	40-60	12.5433	1	4.96792	20.3354	15.3675	8.27236	17.705	2.03889	2.35	9.43264	41.4286	46	55	16	34	47
1464	Female	Flexible Schedule	40-60	12.95	2	7.87944	20.95	13.0706	8.77331	20.3287	1.54296	1.62097	11.5553	21.843	93	126	18	48	88
1465	Male	Morning Shift	<40	16.7833	9	8.38842	22.6708	14.2824	9.59816	20.9923	1.35846	1.89872	11.3941	10.5263	56	71	12	28	47
1466	Male	Morning Shift	<40	11.975	0	6.99458	22.0217	15.0271	9.245	20.2183	2.295	2.46	10.9733	38.4615	19	26	7	13	21
1467	Male	Flexible Schedule	<40	17.8333	9	10.5062	20.8	10.2937	12.0003	19.3533	2.44742	1.51439	7.35306	27.7778	18	27	5	11	19
1468	Male	Regular Work Hours	<40	13.35	3	8.53333	18.6633	10.13	8.85	18.2256	0.859252	0.818376	9.37564	22.8916	24	33	5	13	22
1469	Female	Flexible Schedule	<40	14.5565	6	9.65833	20.1507	10.4924	10.3434	19.8976	1.0804	0.895813	9.55417	21.875	23	35	8	15	24
1470	Male	Rotating Shift	<40	18.7667	9	11.8867	23.1529	11.2662	12.5626	22.2263	1.71364	1.64139	9.66374	18.4211	24	33	8	14	22
1471	Female	Flexible Schedule	<40	15.1561	7	9.66389	21.735	12.0711	10.8416	20.3442	1.80186	1.95498	9.50256	29.6296	24	26	6	11	17
1472	Female	Flexible Schedule	<40	13.8667	4	9.16639	19.8428	10.6764	9.79794	18.2125	0.808681	1.56414	8.41454	22.9508	29	45	11	26	38
1473	Male	Flexible Schedule	<40	11.5	0	7	23.1432	16.1432	9.00897	19.8311	1.00748	2.45222	10.8221	35.0649	28	36	8	17	28
1474	Female	Rotating Shift	40-60	15.5019	7	6.60667	24.3436	17.7369	8.02067	18.4893	2.93633	2.79036	10.4686	36	32	52	10	29	43
1475	Female	Regular Work Hours	40-60	11.8333	0	6.20083	18.7231	12.5222	6.7431	18.5896	0.46881	1.39643	11.8465	27.2446	41	58	9	20	32
1476	Female	Long Work Hours	40-60	15.55	8	6.14111	21.8151	15.674	6.84716	19.9752	0.79619	1.11304	13.128	30.137	22	35	6	17	27
1477	Female	Regular Work Hours	40-60	15.4833	7	6.69	21.7567	15.0667	8.58718	20.4487	2.35128	1.83974	11.8615	21.5054	20	48	5	18	36
1478	Female	Flexible Schedule	>60	13.5919	4	7.83481	20.8568	13.0219	9.67785	19.7928	2.08735	1.38586	10.1149	15.5556	47	72	15	32	52
1479	Female	Regular Work Hours	<40	14.6194	6	7.45333	24.045	16.5917	11.3617	21.4817	3.49497	2.55272	10.12	35.0649	22	40	9	21	33
1480	Female	Regular Work Hours	<40	13.3667	3	8.42167	21.95	13.5283	8.55641	20.441	0.797436	2.11026	11.8846	12.2066	33	65	11	27	45
1481	Female	Long Work Hours	<40	12.8917	2	8.02708	18.9928	10.9657	8.34991	17.1325	0.471175	3.10908	8.78254	14.3836	27	36	5	11	24
1482	Female	Morning Shift	<40	14.5	6	6	21.5187	15.5187	7.25917	19.8452	1.29085	1.81167	12.586	21.3592	21	28	4	8	17
1483	Female	Regular Work Hours	<40	16.1136	8	10.6433	21.8991	11.2558	11.7139	20.0475	1.46676	2.04285	8.33356	30	21	29	7	16	24
1484	Male	Regular Work Hours	<40	13.275	3	8.03333	21.4735	13.4402	8.81698	19.4596	1.0406	2.82323	10.6426	24.3902	24	36	6	15	28
1485	Female	Flexible Schedule	40-60	14.3946	6	7.85035	22.5417	14.6913	9.57151	20.3038	1.60119	2.86117	10.7322	22.7273	35	67	12	29	52
1486	Female	Regular Work Hours	<40	12.6769	2	6.51104	21.3722	14.8612	8.56806	20.5715	2.57492	1.50536	12.0035	30.1587	21	24	6	13	20
1487	Male	Long Work Hours	40-60	15.4417	7	7.1375	19.7542	12.6167	8.6553	18.4359	2.55366	2.01329	9.7806	23.7288	28	38	8	17	28
1488	Female	Flexible Schedule	40-60	14.4333	6	8.68035	21.2814	12.601	9.78534	20.2069	0.895	1.55728	10.4215	21.2644	51	80	16	37	62
1489	Female	Regular Work Hours	40-60	15.15	7	6.7825	20.1	13.3175	7.34109	19.1937	1.58868	0.877457	11.8526	12.5	58	93	15	37	71
1490	Male	Regular Work Hours	40-60	10.8506	0	8.36667	21.1315	12.7648	9.18035	20.1068	1.05162	1.02874	10.9264	60	1	1	1	1	1
1491	Male	Flexible Schedule	40-60	14.5061	6	10.9948	23.8833	12.8886	12.3217	22.2371	2.30506	1.50178	9.91536	26.8519	17	23	4	8	13
1492	Male	Flexible Schedule	<40	9.73333	0	7.8	20.1233	12.3233	8.54444	19.085	1.14756	1.45833	10.5406	57.1429	7	14	4	7	10
1493	Female	Regular Work Hours	<40	14.1	5	8.00556	21.5119	13.5064	9.33981	20.8155	1.98791	1.48402	11.4757	19.403	39	49	8	16	29
1494	Female	Flexible Schedule	40-60	14.1417	5	7.28717	21.7936	14.5064	8.59774	19.0538	0.90869	2.39605	10.456	23.8938	14	26	5	10	17
1495	Male	Regular Work Hours	<40	12.625	1	8.65958	19.3463	10.6867	9.26806	17.4692	0.680085	2.31972	8.20118	20.1923	11	20	2	4	8
1496	Female	Long Work Hours	<40	12.9	2	5.61667	21.5242	15.9075	8.73452	20.1464	1.52143	1.01429	11.4119	25.3521	17	21	5	9	14
1497	Female	Regular Work Hours	>60	14.3939	6	8.89694	19.4911	10.5942	9.38679	18.73	0.710256	0.955897	9.34325	17.7083	24	47	9	20	34
1498	Male	Regular Work Hours	<40	14.7167	6	8.04583	21.4833	13.4375	10.7708	19.5097	2.32574	1.46019	8.73889	22.3776	27	33	4	12	21
1499	Male	Flexible Schedule	40-60	12.2513	1	5.88583	19.0338	13.1479	7.85139	17.5107	1.42083	1.71806	9.65928	50	1	1	1	1	1
1500	Female	Flexible Schedule	>60	14.3814	6	7.75	21.2537	13.5037	8.40528	20.1355	0.946944	2.48927	11.7302	14.2857	58	92	16	38	63
1501	Female	Regular Work Hours	<40	15.5	7	9.678	21.8802	12.2022	10.6657	20.8996	1.92278	1.43264	10.2338	24.6575	33	44	6	19	34
1502	Female	Regular Work Hours	40-60	14.0478	5	7.22333	19.5229	12.2996	8.09026	18.3356	1.09405	1.52313	10.2453	14.2202	40	64	5	18	38
1503	Female	Regular Work Hours	40-60	13.0417	2	6.92902	21.5771	14.6481	7.59931	20.274	0.634742	1.86996	12.6747	25	13	14	3	5	9
1504	Male	Regular Work Hours	40-60	10.1333	0	7.00194	18.7642	11.7622	8.56422	17.0134	2.21487	3.4872	8.44914	25.9259	49	76	19	40	62
1505	Female	Regular Work Hours	40-60	12.7774	2	6.07076	19.8233	13.7525	7.24127	18.605	1.93838	2.14113	11.3637	21.1111	33	65	15	37	54
1506	Male	Regular Work Hours	40-60	15.3833	7	7.20542	18.8833	11.6779	7.59615	18.7013	0.724359	0.973077	11.1051	9.81308	35	49	7	15	28
1507	Female	Flexible Schedule	40-60	13.7667	4	7.19806	19.2592	12.0612	7.50733	18.6217	0.657094	0.967222	11.1144	15.9011	85	140	28	64	107
1508	Female	Regular Work Hours	<40	14.3	5	8.50467	21.9	13.3953	9.01403	20.8493	0.885675	2.4196	11.8353	17.193	71	88	18	34	57
1509	Male	Regular Work Hours	40-60	12.9833	2	7.45583	18.9833	11.5275	8.78394	18.535	2.32378	0.918333	9.75106	20.9677	24	29	6	13	21
1510	Male	Regular Work Hours	<40	13.5	4	7.5	20.0833	12.5833	8.02593	18.8686	0.528571	1.53274	10.8426	24.6914	14	15	2	6	10
1511	Male	Regular Work Hours	<40	14.2833	5	7.95667	22.5017	14.545	9.88452	20.7833	2.12976	2.50944	10.8988	24.7312	27	48	10	23	38
1512	Male	Regular Work Hours	40-60	9.83333	0	6.49167	21.95	15.4583	8.22958	19.4167	1.40222	3.39028	11.1871	34.7518	33	49	8	20	35
1513	Male	Flexible Schedule	<40	15	7	8.90875	22.6222	13.7135	10.5576	19.8254	2.10589	3.37394	9.26775	33.3333	23	30	9	18	25
1514	Male	Rotating Shift	40-60	13.35	3	7.5	21.08	13.58	9.37282	19.9744	2.68103	1.71923	10.6015	39.2405	30	42	10	21	33
1515	Female	Flexible Schedule	40-60	12.3833	1	6.26076	18.0057	11.7449	7.05289	18.0073	1.45494	2.07797	10.9544	20	27	44	13	25	37
1516	Male	Regular Work Hours	40-60	13.35	3	8.35	19.9	11.55	8.98476	19.2154	1.70902	0.866175	10.2306	13.5501	43	57	14	26	37
1517	Female	Morning Shift	40-60	14.8333	6	6.70833	19.87	13.1617	9.45765	19.3101	3.35561	0.710455	9.85245	28.3582	29	38	8	20	31
1518	Female	Regular Work Hours	<40	13.25	3	6.76333	20.6453	13.8819	8.69392	18.9604	2.741	2.35022	10.2665	34.0426	23	35	9	20	29
1519	Female	Long Work Hours	<40	13.8667	4	8.17333	22.8121	14.6387	9.0481	18.7766	1.03662	1.72744	9.72846	32.0755	3	4	1	1	3
1520	Male	Flexible Schedule	<40	12.675	2	5.75306	19.8787	14.1256	7.61024	19.3112	0.928611	1.756	11.7009	21.25	41	56	11	22	38
1521	Female	Regular Work Hours	40-60	14.35	6	9.11667	19.315	10.1983	9.62293	18.1962	0.833568	0.92656	8.57323	33.0275	27	39	8	16	27
1522	Female	Regular Work Hours	<40	12.45	1	7.93333	19.8383	11.905	8.36865	19.0953	0.579637	2.23885	10.7266	20.5674	28	36	7	14	22
1523	Male	Regular Work Hours	40-60	12	0	6.73922	20.1518	13.4126	9.47326	18.9538	2.30982	1.90056	9.48051	28.5714	14	21	5	10	16
1524	Male	Long Work Hours	<40	8.87361	0	7.00806	22.5667	15.5586	8.08662	21.034	1.53729	1.204	12.9473	65.6	36	55	11	25	43
1525	Male	Flexible Schedule	<40	16.2511	8	10.0775	19.5775	9.5	11.5122	18.8894	1.28427	1.41795	7.37712	35.5932	14	21	5	9	14
1526	Female	Regular Work Hours	40-60	13.3963	3	7.32333	21.2521	13.9288	7.97034	19.7884	1.24044	1.94762	11.818	17.1642	44	64	8	19	39
1527	Male	Flexible Schedule	<40	13.0031	2	7.712	20.9836	13.2716	9.30551	19.5282	1.63141	1.99333	10.2227	36.7347	18	28	5	11	19
1528	Female	Rotating Shift	<40	12.0756	0	5.52215	20.5244	15.0023	6.58905	19.106	1.0763	1.95597	12.5169	21.2963	61	77	18	37	56
1529	Male	Flexible Schedule	40-60	17.2333	9	8.30417	25.1641	16.8599	9.9141	22.3502	2.48333	2.08974	12.4361	25	25	43	6	18	32
1530	Female	Regular Work Hours	40-60	16.4067	8	6.95907	20.9222	13.9631	7.69672	18.8281	0.821111	2.30439	11.1313	38.4615	12	13	3	5	9
1531	Female	Flexible Schedule	<40	13.6	4	8.46667	22.1333	13.6667	8.95632	21.2674	0.676389	2.275	12.311	21.0526	52	79	14	32	52
1532	Male	Regular Work Hours	<40	16.0583	8	11.2354	19.8833	8.64792	12.3801	18.7964	1.36944	1.14985	6.41624	28.125	30	47	12	22	35
1533	Female	Regular Work Hours	<40	12.5075	1	5.91667	21.8833	15.9667	7.35677	19.5693	1.08802	2.77796	12.2125	20.8145	21	29	5	10	16
1534	Male	Regular Work Hours	40-60	13.7	4	5.83167	19.075	13.2433	5.95256	18.7243	0.570513	0.742885	12.7717	13.242	55	73	13	30	51
1535	Female	Long Work Hours	<40	17.4833	9	8.11061	23.3897	15.2791	10.2905	22.0338	3.721	1.7362	11.7433	33.121	21	30	7	15	21
1536	Male	Regular Work Hours	40-60	12.5114	1	9.00951	21.0053	11.9958	9.53963	19.3014	0.959815	2.07475	9.76176	51.5152	22	40	3	16	31
1537	Female	Flexible Schedule	>60	11.7667	0	8.4375	20.4147	11.9772	9.5223	19.3449	1.0574	3.38866	9.82265	38.75	21	41	8	17	32
1538	Female	Regular Work Hours	40-60	13.1667	3	7.01069	21.1026	14.0919	7.92915	19.5755	1.57156	1.29575	11.6463	21.7822	18	31	5	12	21
1539	Male	Regular Work Hours	40-60	13.0833	3	6.87222	21.8742	15.0019	7.45516	21.7333	1.64117	1.56466	14.2782	7.60563	34	47	4	11	23
1540	Female	Flexible Schedule	>60	16.1083	8	9.69583	22.3832	12.6874	10.7782	19.5882	1.73462	1.26752	8.81002	20	22	30	6	15	22
1541	Female	Flexible Schedule	>60	15.5167	7	7.08	20.6678	13.5878	8.57188	19.1925	1.95458	2.0066	10.6206	32.2581	32	40	9	20	30
1542	Female	Regular Work Hours	40-60	14.2167	5	8.66687	19.8125	11.1456	10.6888	18.5278	2.21528	1.30342	7.83903	16.9014	20	36	10	19	29
1543	Male	Regular Work Hours	<40	13.7447	4	8.46063	20.6433	12.1827	9.8962	19.6146	1.44329	1.59897	9.71844	27.4854	31	50	9	19	33
1544	Female	Flexible Schedule	40-60	12.6667	1	8.09045	21.1833	13.0929	8.75676	18.7434	0.628819	2.30833	9.98662	30.6452	53	64	13	26	42
1545	Female	Regular Work Hours	>60	13.4892	4	8.39176	20.3634	11.9716	8.90765	18.2745	1.22149	3.02881	9.36689	17.8862	42	57	11	22	39
1546	Female	Regular Work Hours	<40	13.2667	3	8.79904	24.1208	15.3218	10.7617	20.7794	2.52359	2.11341	10.0177	27.2727	19	26	5	12	20
1547	Female	Flexible Schedule	<40	12.15	1	8.54944	22.2771	13.7276	10.3834	19.2202	1.39312	1.32347	8.83685	58.6957	24	31	9	19	26
1548	Female	Regular Work Hours	<40	12.5358	1	7.28236	20.703	13.4206	8.6295	18.6808	1.54129	1.66996	10.0513	20.8791	28	53	13	27	42
1549	Female	Rotating Shift	40-60	15.4835	7	7.86233	24.2667	16.4043	8.86619	21.8871	1.51111	2.64956	13.0209	12.5	47	70	16	34	56
1550	Female	Regular Work Hours	40-60	18	9	9.22156	21.4	12.1784	10.5912	19.4069	1.4953	1.61811	8.81563	33.8462	23	32	7	15	25
1551	Male	Long Work Hours	<40	16.0147	8	7.96967	19.9263	11.9566	10.9335	19.0234	2.00289	1.04806	8.08986	38.7755	21	32	8	18	27
1552	Female	Flexible Schedule	<40	12.4931	1	7.08333	18.5	11.4167	7.36262	18.4581	0.844226	0.448988	11.0955	17.8988	35	46	7	14	26
1553	Female	Regular Work Hours	<40	18.0667	9	7.75	19.9	12.15	9.56912	19.4143	2.48967	1.03371	9.84523	27.2727	39	63	13	28	49
1554	Male	Rotating Shift	40-60	12.7639	2	6.82667	22.1538	15.3271	8.62995	19.665	1.92049	3.05711	11.0351	30.5085	19	40	10	24	34
1555	Female	Regular Work Hours	40-60	13.7667	4	7.8	21.5708	13.7708	8.40698	19.5233	0.948948	1.78329	11.1163	15.3153	49	66	13	30	51
1556	Male	Regular Work Hours	40-60	9.21667	0	6.18833	19.4567	13.2683	6.65752	18.0231	0.740159	2.85978	11.3655	29.8507	3	4	1	1	1
1557	Male	Flexible Schedule	40-60	12.2667	1	7	24.0099	17.0099	7.80675	20.0662	1.05658	2.00186	12.2595	27.0833	33	40	7	16	27
1558	Male	Regular Work Hours	40-60	13.445	3	6.02754	20.6158	14.5883	6.59975	19.4018	1.09287	2.4181	12.802	26.8908	20	27	2	9	16
1559	Female	Flexible Schedule	<40	14.9671	7	7.34583	24.4982	17.1523	9.64472	21.3677	2.48632	2.94412	11.723	24.5902	20	23	5	9	13
1560	Female	Flexible Schedule	<40	16.5164	8	10.0133	24	13.9867	11.1943	21.7569	1.86013	2.29432	10.5626	30.622	33	46	10	20	30
1561	Female	Flexible Schedule	<40	13.3442	3	6.88578	21.1458	14.26	8.70226	19.836	2.22784	1.28303	11.1337	13.3333	26	47	6	16	33
1562	Male	Flexible Schedule	40-60	11.575	0	6.62875	17.8012	11.1725	7.07121	16.2666	0.639394	2.36134	9.1954	26.4706	6	8	2	4	5
1563	Female	Regular Work Hours	<40	12.725	2	7.59792	18.9292	11.3313	8.84583	17.0833	1.23056	2.2125	8.2375	25.7576	35	50	10	28	41
1564	Female	Flexible Schedule	40-60	15.2793	7	7.73915	20.9031	13.164	8.49498	19.797	1.63271	2.17685	11.302	18.1319	45	60	12	24	39
1565	Female	Flexible Schedule	<40	16.3693	8	9.28147	20.9842	11.7027	10.2092	18.9295	1.38515	1.94596	8.72035	48.2759	21	34	9	20	29
1566	Male	Regular Work Hours	40-60	12.1917	1	6.24667	20.4408	14.1942	7.88683	18.8778	1.39442	1.40167	10.9909	25.8621	7	13	2	6	10
1567	Male	Regular Work Hours	40-60	14.055	5	6.92533	19.9212	12.9959	9.42854	18.9385	2.48793	1.12394	9.50992	20.4301	22	41	7	17	31
1568	Male	Flexible Schedule	40-60	11.5	0	8.25098	21.2871	13.0362	10.1935	19.2204	1.33657	1.15049	9.02692	32.3529	13	18	5	12	16
1569	Female	Regular Work Hours	40-60	14.2667	5	6.60717	20.3769	13.7697	8.61835	19.5866	2.73679	0.706346	10.9683	14.8148	32	50	10	22	38
1570	Female	Flexible Schedule	40-60	13.225	3	9.29042	20.8008	11.5104	10.2332	19.0517	0.959222	1.1885	8.8185	36.6667	29	35	7	16	26
1571	Male	Rotating Shift	<40	17.6333	9	6	24.1667	18.1667	13.0681	21.1278	3.04583	1.64583	8.05972	39.8936	37	53	11	22	35
1572	Female	Regular Work Hours	<40	10.1986	0	6.85031	20.2	13.3497	8.19922	17.1878	2.10728	2.29133	8.98861	40	23	26	5	11	20
1573	Female	Regular Work Hours	40-60	13.9667	5	7.46486	22.4508	14.9859	8.01135	21.3001	1.41948	2.95806	13.2888	8.1571	67	92	12	35	60
1574	Female	Regular Work Hours	40-60	16.4833	8	9.97125	21.3671	11.3958	10.8875	19.5605	0.725787	2.76	8.67301	25	27	39	9	18	31
1575	Female	Regular Work Hours	40-60	17.3311	9	9.61417	21.3058	11.6917	11.1176	20.9	1.99135	0.830769	9.78241	20.1493	25	37	8	15	24
1576	Female	Flexible Schedule	<40	13.0333	2	8.14931	19.389	11.2397	8.56312	18.3237	0.796845	1.39143	9.7606	23.3766	29	38	9	18	26
1577	Male	Regular Work Hours	<40	14.9571	7	7.89083	19.3629	11.472	9.14167	17.5078	1.7138	2.07648	8.36616	35.9375	20	22	4	10	16
1578	Female	Flexible Schedule	40-60	14.1164	5	8.89654	22.0976	13.2011	9.63569	20.1904	1.46353	2.51675	10.5547	18.4466	43	58	11	28	46
1579	Female	Regular Work Hours	40-60	12.515	1	7.67574	21.201	13.5252	7.903	19.5099	0.50756	1.4703	11.6069	12.2449	37	50	9	20	33
1580	Female	Regular Work Hours	40-60	12.7417	2	6.20106	19.4854	13.2844	7.59137	18.5487	1.46393	0.710873	10.9574	23.2143	37	62	9	19	34
1581	Female	Regular Work Hours	40-60	13.1333	3	7.59167	22.1312	14.5395	8.21548	20.3598	0.855952	2.85246	12.1443	15.6398	61	95	13	35	68
1582	Female	Regular Work Hours	<40	14	5	8	21.9167	13.9167	10.0566	19.9349	2.31201	1.11389	9.87821	33.7349	28	48	10	25	39
1583	Male	Flexible Schedule	<40	12.6	1	8.94667	23.9167	14.97	9.7119	21.711	1.53929	3.0444	11.9991	31.4465	41	54	11	23	38
1584	Female	Long Work Hours	<40	13.5556	4	6.09194	23.3433	17.2514	8.13378	19.7351	1.85083	3.37991	11.6013	29.6552	17	21	4	8	14
1585	Female	Long Work Hours	40-60	13.5	4	9.50389	20.6875	11.1836	10.5	19.5869	1.46558	1.43933	9.08692	25.1908	41	58	14	29	44
1586	Female	Regular Work Hours	>60	12.8963	2	4.89385	23.0752	18.1813	6.5816	19.0348	1.69575	3.07015	12.4532	22.7273	10	12	3	5	8
1587	Male	Regular Work Hours	<40	14.2417	5	8.77042	20.9563	12.1858	11.0581	20.3014	2.175	0.997401	9.24333	20.7547	32	47	12	22	34
1588	Female	Regular Work Hours	40-60	15.3083	7	8.80833	20.9833	12.175	9.31282	19.7679	0.731047	0.984615	10.4551	25.7225	90	124	20	49	79
1589	Female	Rotating Shift	<40	21.5667	9	11.3559	26.1016	14.7457	15.0434	24.7288	4.70422	2.40128	9.68531	28.0899	33	46	9	22	37
1590	Male	Regular Work Hours	40-60	12.5667	1	5.63417	18.3533	12.7192	6.80729	17.3264	2.67153	1.58611	10.5191	23.2877	27	47	5	20	36
1591	Male	Regular Work Hours	<40	9.77639	0	7.99944	18.4695	10.4701	8.90797	17.6215	1.13286	2.15579	8.71353	33.913	19	25	5	9	15
1592	Female	Rotating Shift	<40	14.4	6	6.65417	20.3208	13.6667	8.50185	19.0542	3.03611	1.38521	10.5523	9.42408	45	52	13	25	36
1593	Female	Regular Work Hours	40-60	12.8833	2	7.44208	21.5133	14.0712	9.3359	20.2821	2.42308	1.96026	10.9462	50	2	9	2	6	8
1594	Female	Regular Work Hours	40-60	14	5	8.52992	18.8403	10.3104	9.30895	18.1522	1.35581	0.977137	8.84327	23.8806	19	25	4	10	18
1595	Female	Long Work Hours	<40	12.1917	1	8.60208	25.2688	16.6667	9.22311	19.2278	0.438636	2.19697	10.0047	22.7273	17	31	7	14	24
1596	Male	Regular Work Hours	40-60	10.4667	0	9.68111	19.4117	9.73056	10.0831	18.4833	0.369028	1.47467	8.40017	44.0678	39	56	11	25	42
1597	Male	Flexible Schedule	40-60	14.6167	6	9	19.8425	10.8425	9.41829	18.7028	0.556528	1.16125	9.2845	27.3684	16	24	4	9	14
1598	Female	Flexible Schedule	40-60	14.0551	5	8.7059	22.2639	13.558	9.73033	19.6221	1.71086	1.55068	9.89177	31.5789	20	21	4	8	14
1599	Male	Regular Work Hours	<40	12.2167	1	7.58542	20.0022	12.4168	8.80914	18.8924	1.91331	0.953935	10.0832	30	49	64	13	29	49
1600	Female	Regular Work Hours	40-60	12.8	2	7.14708	20.2127	13.0656	7.44357	19.4272	0.499295	2.07632	11.9837	8.49057	64	97	19	43	75
1601	Male	Flexible Schedule	<40	14.8519	7	10.5336	22.1928	11.6592	11.944	21.6122	1.32238	0.732341	9.66815	34.965	20	26	4	11	18
1602	Male	Regular Work Hours	<40	16.2167	8	9.95625	23.5104	13.5542	11.7385	21.269	1.65141	1.7615	9.53051	27.3585	37	61	13	27	46
1603	Male	Regular Work Hours	>60	10.3788	0	6.96667	19.3852	12.4186	7.25455	18.8645	0.802146	1.07354	11.61	40.4762	46	52	11	22	38
1604	Male	Regular Work Hours	40-60	17.8326	9	9.10083	22.7254	13.6246	12.1492	21.4374	4.279	1.21077	9.28816	27.2727	27	49	11	24	38
1605	Male	Flexible Schedule	<40	15.5	7	12.5	24.2628	11.7628	13.5311	22.2472	1.81667	1.16525	8.71619	30.2083	22	30	6	11	20
1606	Female	Flexible Schedule	40-60	12.7422	2	7.75	21.6509	13.9009	8.19656	20.7085	1.26033	1.87883	12.5119	12.1951	19	54	11	26	41
1607	Female	Flexible Schedule	40-60	14.0972	5	9.98333	17.9974	8.01408	10.1567	17.7075	0.302321	0.889603	7.55079	28.4314	57	80	19	37	60
1608	Male	Regular Work Hours	<40	10.0333	0	7.3	17.8833	10.5833	8.38167	14.7574	1.39536	1.65333	6.37572	42.9825	36	47	8	18	34
1609	Male	Flexible Schedule	40-60	12.0106	0	5.1	20.0173	14.9173	6.18288	18.6139	1.77073	3.1094	12.431	32.9897	25	34	7	15	24
1610	Female	Regular Work Hours	<40	13.1667	3	8.0434	20.75	12.7066	10.25	19.2881	1.8681	1.45306	9.03808	20.8791	29	58	15	33	48
1611	Female	Regular Work Hours	40-60	14.85	7	11.095	24.2179	13.1229	12.117	20.5926	2.10922	2.35386	8.47558	28.0702	24	35	7	17	26
1612	Female	Regular Work Hours	40-60	13	2	6.93708	20.9804	14.0433	7.61042	20.2717	1.37958	1.68867	12.6613	19.7917	27	43	5	16	33
1613	Male	Flexible Schedule	<40	12.5667	1	5.22825	24.6167	19.3884	8.01611	21.0822	3.58957	3.63776	13.066	17.1717	28	42	7	18	29
1614	Female	Flexible Schedule	<40	13.5075	4	8.12917	20.753	12.6238	9.84989	19.3082	1.76122	1.47739	9.45833	32.5581	21	28	6	13	22
1615	Male	Long Work Hours	40-60	11	0	4.75	20.5073	15.7573	7.28319	18.2024	1.81236	3.18657	10.9192	26.9565	30	40	9	17	26
1616	Female	Flexible Schedule	40-60	13.1167	3	6.86417	17.9899	11.1257	7.35224	16.1554	0.558333	2.18092	8.80314	38.806	19	31	5	12	21
1617	Female	Flexible Schedule	40-60	17.0114	9	6.29667	21.2333	14.9367	7.36976	19.5678	1.43241	1.22263	12.198	13.5593	52	80	10	30	55
1618	Male	Regular Work Hours	40-60	14.0879	5	9.11931	20.1451	11.0258	10.1529	18.6918	2.04697	2.19845	8.53896	26.7241	28	47	9	20	36
1619	Female	Flexible Schedule	<40	13.25	3	6.68125	21.2774	14.5961	8.24392	17.6845	1.40783	2.13417	9.44061	22.9167	42	63	13	29	47
1620	Male	Flexible Schedule	>60	13.5244	4	8.08542	18.9497	10.8643	8.98203	18.4883	1.37028	1.15244	9.5063	28.1818	30	45	8	19	30
1621	Male	Regular Work Hours	<40	13.21	3	9.19017	21.0641	11.8739	9.79788	19.5622	1.55205	2.28312	9.76436	20.1058	34	40	7	15	24
1622	Female	Regular Work Hours	40-60	15.4333	7	10.75	20.7479	9.99792	11.0512	19.7488	0.808393	2.19532	8.69762	12.8713	67	106	14	40	79
1623	Male	Flexible Schedule	<40	14.4378	6	7.50833	21.4056	13.8972	9.45839	20.3467	2.49155	1.01869	10.8883	17.5824	26	38	7	16	28
1624	Female	Long Work Hours	40-60	13.4	3	6.91667	21.0026	14.086	8.4275	20.2951	1.55571	0.931346	11.8676	21.6216	37	65	11	30	50
1625	Female	Regular Work Hours	40-60	14.8097	6	6.48333	18.7542	12.2708	6.85618	18.0787	0.499124	0.870449	11.2226	22.6891	28	57	8	26	45
1626	Female	Regular Work Hours	<40	13.6667	4	7.10606	20.2467	13.1407	7.40641	19.5804	1.11175	0.937179	12.174	11.9658	48	85	16	39	65
1627	Female	Flexible Schedule	40-60	10.6442	0	6.47532	19.4741	12.9988	7.22494	18.4452	0.908234	2.84742	11.2202	16.9355	25	34	4	10	21
1628	Male	Rotating Shift	40-60	12.5128	1	5.34563	24.7599	19.4142	7.65911	18.1399	3.72056	4.46183	10.4808	25.4902	28	36	8	16	27
1629	Female	Flexible Schedule	<40	14.4083	6	9.01667	18.5333	9.51667	10.625	17.8625	1.16192	1.52907	7.2375	21.0526	23	35	9	17	25
1630	Female	Regular Work Hours	<40	13.7167	4	8.08231	21.2992	13.2169	9.40194	20.3437	1.50091	1.3095	10.9418	26.3158	32	42	8	18	31
1631	Male	Flexible Schedule	<40	12.6214	1	8.35583	18.2112	9.85533	8.87092	16.5467	0.458944	1.62194	7.67578	28.1609	20	21	5	9	14
1632	Female	Flexible Schedule	40-60	13	2	7.955	20	12.045	8.9894	18.5558	1.66353	1.84117	9.56643	32.2581	58	77	19	44	64
1633	Female	Regular Work Hours	40-60	12.5	1	8.47972	21.3	12.8203	9.1456	18.455	0.477454	1.62852	9.30935	39.0244	11	23	7	14	20
1634	Male	Flexible Schedule	40-60	17.25	9	8.06579	20.9	12.8342	9.12415	18.7473	1.22323	1.12722	9.62318	52.7273	18	28	6	13	22
1635	Female	Regular Work Hours	40-60	12.8583	2	7.51667	19.8762	12.3596	8.28095	19.519	0.802639	1.98095	11.2381	13.7615	41	59	9	22	38
1636	Female	Rotating Shift	<40	14.171	5	8.00878	19.0944	11.0857	8.33756	17.4876	0.466774	1.03034	9.15009	23.9583	15	19	4	8	11
1637	Female	Flexible Schedule	<40	12.3333	1	9.75	19.4667	9.71667	10.6936	18.5	1.04605	1.78624	7.80641	18.6207	37	60	12	26	45
1638	Female	Flexible Schedule	40-60	12.5833	1	8.78455	19.2567	10.4721	9.9825	18.7225	1.63181	1.47352	8.74005	43.2692	45	61	13	29	48
1639	Male	Long Work Hours	40-60	13.5554	4	8.79305	21.0278	12.2347	9.32968	19.9496	0.836349	2.43339	10.6199	41.2281	21	27	6	11	17
1640	Male	Morning Shift	<40	13.9565	5	7.50422	22.4333	14.9291	9.22929	20.9894	2.59004	1.27927	11.7601	26.9231	22	31	5	12	21
1641	Male	Regular Work Hours	40-60	14.0167	5	6.30708	19.4529	13.1458	8.18095	18.2289	2.82262	0.92879	10.048	29	27	34	9	18	26
1642	Female	Regular Work Hours	40-60	10.8833	0	6.76667	19.3699	12.6032	7.3647	18.2065	0.738016	2.57335	10.8418	20.2247	57	77	10	25	49
1643	Female	Regular Work Hours	40-60	13.0667	2	5.60767	20.4074	14.7998	7.22931	19.6174	1.0022	1.62486	12.3881	14.7541	48	77	14	31	50
1644	Male	Regular Work Hours	<40	14.8333	6	8.28	20.4817	12.2017	9.17544	19.7776	0.694139	0.741167	10.6021	21.6216	1	2	1	2	2
1645	Female	Flexible Schedule	40-60	13.9772	5	8.64746	19.3975	10.75	8.95058	18.5285	0.732847	1.23495	9.57796	30	11	21	2	7	15
1646	Male	Regular Work Hours	<40	14.1167	5	7.94792	20.4833	12.5354	8.56071	20.0905	0.721607	1.31587	11.5298	15	43	56	11	23	36
1647	Male	Regular Work Hours	<40	13.4228	3	9.28179	19.5709	10.2891	9.61216	18.0155	0.747679	1.50391	8.40333	20	21	29	5	10	18
1648	Male	Flexible Schedule	>60	15.5476	8	8.3875	20.4577	12.0702	10.0486	19.0763	2.39558	1.22799	9.02774	36.0465	50	74	17	41	61
1649	Female	Flexible Schedule	<40	14.7974	6	8	22.7896	14.7896	10.4254	20.2053	2.22935	3.31433	9.77998	39.7059	15	27	7	14	20
1650	Female	Flexible Schedule	40-60	11.7432	0	6.55	21.0931	14.5431	8.14755	18.3244	1.25463	3.06343	10.1769	25	37	44	10	21	34
1651	Male	Long Work Hours	<40	11.5679	0	6.29441	20.1137	13.8193	7.59782	19.7548	0.748009	0.575278	12.157	19.7368	25	32	3	12	24
1652	Male	Regular Work Hours	40-60	13.7531	4	7.29227	20.3989	13.1066	7.99355	18.454	0.825128	2.10763	10.4605	38	8	11	3	5	7
1653	Male	Regular Work Hours	40-60	11.0133	0	5.77762	19.985	14.2074	6.91528	17.7054	1.40808	3.70442	10.7901	25.4545	4	4	1	2	3
1654	Male	Flexible Schedule	<40	13.5783	4	9.83333	18.75	8.91667	10.2739	18.0236	0.564286	0.952063	7.74972	32.0755	14	14	5	8	10
1655	Female	Regular Work Hours	40-60	15.5047	7	8.38333	21.0204	12.6371	8.90286	19.9842	0.986346	2.06756	11.0813	25	24	32	6	12	21
1656	Female	Regular Work Hours	<40	14.475	6	7.16307	21.9329	14.7698	8.35833	20.9984	1.1024	1.72024	12.6401	20.1754	65	94	19	53	78
1657	Male	Regular Work Hours	>60	15.8167	8	8.18333	21.1692	12.9858	10.0256	20.3081	1.13452	0.974762	10.2825	17.6471	18	25	3	7	14
1658	Female	Regular Work Hours	40-60	15.85	8	9.40833	19.8521	10.4437	10.8481	18.0014	2.20689	1.70144	7.15331	35.5263	30	51	11	29	42
1659	Female	Regular Work Hours	<40	13.1915	3	7.61167	20.7218	13.1102	8.32784	19.3632	0.917949	2.02079	11.0353	38	1	1	1	1	1
1660	Female	Flexible Schedule	40-60	12.9056	2	8.00135	21.1886	13.1873	8.71157	19.0357	0.583356	1.57468	10.3241	30.2083	27	46	6	19	35
1661	Female	Long Work Hours	40-60	13.5417	4	6.92917	21.147	14.2178	7.17857	21.0072	1.2855	1.14343	13.8287	13.245	35	60	7	21	42
1662	Female	Flexible Schedule	<40	17.6667	9	7.47917	21.1042	13.625	9.41667	19.1944	1.52667	1.15383	9.77769	48.3871	14	17	4	9	14
1663	Female	Flexible Schedule	>60	15.4468	7	8.55208	19	10.4479	11.1417	17.8028	1.19722	1.3144	6.66111	29.4643	45	71	20	38	58
1664	Female	Regular Work Hours	40-60	12.5167	1	7.81028	21.7954	13.9851	8.58581	19.2533	1.21542	1.78563	10.6675	21.9178	39	61	11	32	50
1665	Male	Regular Work Hours	<40	13.35	3	7.33361	19.6333	12.2997	9.41154	18.6103	1.14483	2.20192	9.19878	34.375	32	39	9	18	27
1666	Male	Long Work Hours	40-60	13.1528	3	7.54724	20.5925	13.0453	8.92719	19.0404	1.86778	1.27497	10.1133	19.1176	29	43	8	23	35
1667	Female	Regular Work Hours	40-60	13.0083	2	7.54247	19.0833	11.5409	8.04794	18.2704	0.502063	0.740794	10.2225	26.7241	36	64	12	31	51
1668	Female	Flexible Schedule	>60	15.1167	7	8.16351	21.5229	13.3593	9.50173	21.2032	1.26744	0.918948	11.7015	24.026	38	57	11	25	39
1669	Female	Flexible Schedule	40-60	12.8833	2	6.14583	20.6729	14.5271	7.33949	19.3001	2.14965	3.86546	11.9606	26.3158	47	69	17	39	57
1670	Male	Regular Work Hours	40-60	12.0524	0	6.58842	18.6687	12.0803	8.99185	18.1259	2.84051	1.09525	9.1341	27.6596	24	37	5	14	27
1671	Female	Regular Work Hours	40-60	11.3819	0	7.91667	19.381	11.4643	8.09637	17.1687	0.507401	1.31718	9.07232	17.4419	21	25	5	10	16
1672	Female	Flexible Schedule	40-60	15.0164	7	7.07289	21.5344	14.4616	8.39182	20.8496	2.14979	1.47607	12.4578	18.3007	40	55	9	22	36
1673	Male	Regular Work Hours	<40	12.5678	1	7.31806	21.7246	14.4065	8.63853	19.8704	1.43792	2.42095	11.2319	29.5775	28	43	9	21	34
1674	Female	Flexible Schedule	40-60	16.3667	8	10.7833	19.75	8.96667	11.0694	18.5639	0.388889	0.716667	7.49444	27.1233	49	66	12	25	40
1675	Female	Flexible Schedule	40-60	13.15	3	6.84708	21.425	14.5779	9.83437	19.5103	1.37523	1.51884	9.67591	23.1884	12	24	4	10	18
1676	Female	Flexible Schedule	<40	12.75	2	6.66867	23.2949	16.6262	8.199	19.6976	1.34314	3.88178	11.4986	36.8421	2	3	1	1	2
1677	Male	Regular Work Hours	<40	13.2167	3	7.70333	18.5833	10.88	8.39524	17.3	1.09448	2.0044	8.90476	34.8837	5	9	3	6	8
1678	Male	Regular Work Hours	<40	13.3472	3	7.34917	21.8663	14.5171	9.06917	19.6613	1.68083	2.72	10.5922	28.5714	23	31	5	13	23
1679	Male	Rotating Shift	<40	10.75	0	4.5	20.85	16.35	6.60417	18.5833	2.00417	3.68611	11.9792	54.0541	23	36	7	17	29
1680	Male	Morning Shift	>60	11.0453	0	4.67756	26.7726	22.0951	5.84454	20.6353	2.43329	3.76745	14.7907	11.7647	29	48	8	18	31
1681	Male	Night Shift	<40	18.5	9	4.25644	27.4728	23.2164	6.07113	22.3075	2.17861	5.39759	16.2364	36.4706	15	26	4	10	18
1682	Male	Regular Work Hours	40-60	12.5868	1	7.02521	19.3484	12.3232	8.18938	17.601	1.54963	2.72882	9.41162	36.1111	19	28	4	10	21
1683	Female	Regular Work Hours	40-60	12.2106	1	6.33359	18.5188	12.1852	8.26492	17.3806	1.13456	1.507	9.11564	41.1765	11	12	4	7	10
1684	Male	Long Work Hours	40-60	13	2	7.645	20.7667	13.1217	8.63452	19.0131	1.28373	1.96637	10.3786	15.7447	51	70	14	32	48
1685	Female	Flexible Schedule	40-60	13.4668	4	7.58333	23.5938	16.0104	9.14242	18.6519	1.19545	2.26515	9.50944	18.3333	35	61	16	38	52
1686	Female	Flexible Schedule	40-60	14.1833	5	7.18792	21.2692	14.0813	7.60303	19.7511	0.72412	1.74486	12.1481	26.087	28	42	7	15	25
1687	Female	Regular Work Hours	40-60	13.925	5	8	20.0133	12.0133	8.14167	20.1298	2.30595	2.06429	11.9881	10.9272	55	83	16	34	54
1688	Female	Regular Work Hours	<40	14.9667	7	8.085	22.9716	14.8866	9.5953	21.2927	2.67119	2.56413	11.6974	15.8879	36	64	14	32	51
1689	Male	Regular Work Hours	40-60	12.2667	1	6.82333	20.8663	14.043	8.45361	18.3077	1.2862	2.25299	9.85412	20.5479	3	3	1	2	2
1690	Male	Flexible Schedule	<40	14.0167	5	8.99006	22.6581	13.668	9.96937	19.6691	0.99912	3.32539	9.69977	27.5	16	25	5	11	19
1691	Female	Long Work Hours	40-60	13.9522	5	6.63737	19.4501	12.8128	7.96203	18.2506	1.26132	1.98252	10.2885	30	15	32	7	14	23
1692	Female	Long Work Hours	40-60	15.6833	8	9.30833	22.7333	13.425	10.8051	20.5	1.32564	1.86263	9.69487	26.7606	20	31	9	17	26
1693	Male	Regular Work Hours	40-60	19.5	9	8.5	19.5	11	8.5	19.5	0.0333333	0.0397436	11	0	5	5	3	4	5
1694	Female	Flexible Schedule	<40	13.8833	5	8.96667	22.5042	13.5375	10.068	20.8233	1.83597	2.43042	10.7553	23.5849	19	29	6	12	19
1695	Male	Regular Work Hours	<40	15.5836	8	9	23.6305	14.6305	10.7333	21.4095	1.3556	2.48403	10.6762	36.9048	16	22	5	10	15
1696	Female	Flexible Schedule	40-60	13.15	3	6.99292	19.6929	12.7	8.13214	18.3761	1.49901	1.59984	10.244	29.6875	5	9	2	4	7
1697	Male	Regular Work Hours	<40	11.95	0	6.98778	18.603	11.6152	7.51744	17.5554	0.752996	1.48312	10.0379	29.8507	19	29	6	13	21
1698	Male	Rotating Shift	40-60	14.9469	7	7.68847	21.4131	13.7247	9.17002	19.5552	1.63653	1.87764	10.3852	25.5924	41	67	12	27	44
1699	Male	Flexible Schedule	>60	13.5044	4	8.65167	20.8853	12.2337	9.2978	19.3333	1.34372	2.67942	10.0355	26.5734	21	27	5	10	16
1700	Male	Regular Work Hours	>60	10.5528	0	4.61385	18.8303	14.2164	6.28246	17.0257	1.49821	1.80855	10.7432	33.7209	11	14	3	6	9
1701	Female	Flexible Schedule	40-60	13.8	4	5.93333	21.25	15.3167	7.90385	20.065	2.29363	2.07878	12.1612	23.7736	32	49	4	13	26
1702	Female	Flexible Schedule	<40	15.5794	8	9.70842	21.9123	12.2039	10.9542	20.301	1.68038	1.34603	9.34684	33.9623	22	30	7	15	24
1703	Female	Flexible Schedule	>60	12.9143	2	8.6074	21.2302	12.6228	9.91374	19.9568	1.67328	2.04283	10.043	15.5405	33	86	13	38	64
1704	Female	Flexible Schedule	<40	12.6611	1	7.86667	20.4158	12.5492	8.889	19.2024	1.68433	2.12361	10.3134	26.1538	27	32	7	15	25
1705	Male	Flexible Schedule	<40	17.1328	9	8.06667	22.4977	14.431	10.1038	20.9221	1.3765	1.58361	10.8183	29.4118	13	24	4	11	18
1706	Female	Regular Work Hours	>60	15.35	7	8.29458	19.6167	11.3221	10.1993	18.7497	2.69667	0.683205	8.55043	24.1667	63	101	22	54	83
1707	Female	Regular Work Hours	40-60	14.7833	6	9.4825	20.6458	11.1633	10.2705	19.6513	0.755128	1.35761	9.38083	18.3673	51	68	15	32	52
1708	Female	Regular Work Hours	40-60	13.7167	4	5.80333	21.0126	15.2093	7.08236	19.5702	0.94369	1.99179	12.4879	16.0839	23	32	6	14	21
1709	Male	Long Work Hours	40-60	15.6247	8	9.73167	22.5347	12.803	10.8158	20.9614	2.01192	1.83635	10.1456	25.1613	39	51	11	21	33
1710	Female	Regular Work Hours	<40	14	5	7.88611	20.0483	12.1622	9.21064	17.8613	1.36358	2.63006	8.65064	45.1613	25	38	8	21	32
1711	Female	Rotating Shift	40-60	13.4167	3	8.47	19.1967	10.7267	9.94336	17.937	1.96449	0.934213	7.99363	25.4438	43	56	13	25	38
1712	Female	Flexible Schedule	40-60	12.9135	2	5.92608	21.4582	15.5321	8.2994	19.3567	3.09016	3.07692	11.0573	21.2121	25	45	9	20	35
1713	Female	Flexible Schedule	>60	11.4678	0	6.11333	18.9713	12.858	6.82861	17.7395	0.677714	2.90613	10.9109	10.2703	51	67	13	27	44
1714	Male	Long Work Hours	40-60	15.3667	7	8.23333	23.0333	14.8	9.60833	22.2143	1.58095	1.60714	12.606	20.3463	57	81	16	36	58
1715	Female	Evening Shift	40-60	13.5	4	7.75	19.0125	11.2625	8.4641	18.3653	0.621795	2.49462	9.90115	26.5	43	65	10	25	42
1716	Male	Regular Work Hours	<40	13.4503	3	7.13583	19.2229	12.0871	7.79071	18.8965	0.937821	1.80521	11.1058	15.2632	45	67	13	29	48
1717	Female	Flexible Schedule	<40	12.5578	1	7.01667	18.6	11.5833	7.85975	17.8099	1.25975	1.85264	9.95014	24.026	37	39	8	17	25
1718	Female	Flexible Schedule	<40	16.3379	8	5.79167	27.5222	21.7305	10.8587	23.3118	4.39278	5.77871	12.4531	37.5	24	29	2	8	19
1719	Male	Flexible Schedule	<40	13.2378	3	5.88625	19.9838	14.0975	7.08771	18.4244	2.74004	2.39491	11.3367	48.1481	25	44	8	23	36
1720	Female	Regular Work Hours	40-60	12.9514	2	8.55517	22.6752	14.1201	9.59853	21.3519	1.40411	2.95437	11.7534	15.3846	41	55	7	20	37
1721	Female	Flexible Schedule	40-60	13.75	4	7.31594	21.6042	14.2882	8.18093	20.7888	1.31351	1.62218	12.6078	21.5909	67	90	12	36	69
1722	Female	Long Work Hours	40-60	12.4667	1	5.68592	19.9879	14.302	7.02377	19.233	1.47913	0.592302	12.2092	24.1379	49	70	13	31	55
1723	Female	Flexible Schedule	<40	13.2583	3	9.24917	22.1208	12.8717	10.0917	20.377	0.831091	1.99137	10.2853	33.3333	33	44	9	19	30
1724	Female	Flexible Schedule	<40	16.5075	8	9.5	21.2498	11.7498	10.2638	20.3207	1.04131	2.53347	10.0569	19.403	49	85	18	41	68
1725	Female	Regular Work Hours	40-60	14.6	6	7.9655	22.0039	14.0384	8.46391	19.7223	0.959293	2.50917	11.2584	28.0702	4	4	1	2	3
1726	Male	Flexible Schedule	>60	16.2917	8	5.76352	19.3189	13.5554	6.60002	18.5554	1.63139	0.99938	11.9554	26.9231	27	29	7	14	22
1727	Female	Long Work Hours	40-60	13.325	3	7.24375	20.6333	13.3896	7.79333	19.5316	0.898098	1.48624	11.7383	13.2075	49	69	12	30	51
1728	Female	Flexible Schedule	<40	15.8093	8	9.08702	19.7045	10.6174	9.38106	19.2052	0.542778	0.511806	9.82417	18.1818	38	56	10	26	44
1729	Male	Flexible Schedule	<40	12.4333	1	8.95	18.6167	9.66667	9.93056	17.5861	1.29861	1.14306	7.65556	35.9116	28	47	11	22	33
1730	Male	Rotating Shift	<40	13.5	4	8	21.075	13.075	8.9655	19.942	1.41409	1.12734	10.9765	29.0909	22	34	7	15	27
1731	Male	Morning Shift	<40	14.8417	7	9.67318	23.1238	13.4506	10.4362	21.0451	1.06337	1.41028	10.609	14.8515	37	52	10	21	33
1732	Female	Regular Work Hours	<40	12	0	7.27778	20.2292	12.9514	8.39893	19.3054	0.923532	0.656508	10.9064	46.5649	46	81	16	39	64
1733	Male	Regular Work Hours	40-60	13.8901	5	7	20.5	13.5	8.125	19.979	1.07857	0.443274	11.854	17.5439	25	33	3	9	18
1734	Female	Long Work Hours	>60	16.0722	8	6.73333	21.8693	15.136	8.42528	19.8735	1.16308	2.49316	11.4483	24.1071	48	79	16	36	62
1735	Female	Regular Work Hours	40-60	12.15	1	6.93333	19.1167	12.1833	7.12738	18.3821	0.790476	1.275	11.2548	9.74729	63	81	12	32	52
1736	Female	Regular Work Hours	40-60	11.7539	0	5.34583	20.0586	14.7128	6.45863	18.6729	1.48643	2.31528	12.2143	17.2185	40	53	7	19	36
1737	Female	Regular Work Hours	40-60	12.8583	2	9.25208	20.9396	11.6875	10.3042	19.1718	1.50218	1.33846	8.86752	30.2632	26	42	7	18	32
1738	Female	Regular Work Hours	<40	12.8333	2	6.42556	22.8381	16.4125	7.48284	20.7578	1.54048	2.61502	13.2749	34.2995	48	89	17	39	68
1739	Male	Regular Work Hours	40-60	12.2936	1	6.52176	21.7432	15.2215	7.17534	19.5038	0.669365	1.91153	12.3285	23.4043	6	9	2	3	5
1740	Female	Long Work Hours	40-60	14.0833	5	7.36667	21.6917	14.325	8.4454	21.2306	1.33627	1.22675	12.7852	19.5652	78	99	19	38	63
1741	Female	Regular Work Hours	<40	14.6531	6	7.16875	21.388	14.2192	8.32354	20.6494	3.28081	2.40545	12.3259	22.5	28	42	8	20	33
1742	Male	Regular Work Hours	40-60	12.1	0	5.24	19.3417	14.1017	5.92741	17.8827	1.09842	1.22376	11.9553	23.7288	19	24	4	10	17
1743	Female	Flexible Schedule	40-60	12.7667	2	7.81083	23.7842	15.9733	8.24771	18.9706	1.99551	3.53038	10.7229	10.757	65	95	18	40	66
1744	Male	Regular Work Hours	<40	12.25	1	7	20.425	13.425	7.58869	19.1405	0.775	1.72333	11.5518	34.4828	27	42	9	18	31
1745	Male	Regular Work Hours	40-60	17.3	9	11.5048	23.5842	12.0794	12.1766	20.1668	1.43369	1.47361	7.99023	22.0339	14	24	7	12	19
1746	Female	Regular Work Hours	40-60	14	5	8	21.305	13.305	8.9453	19.0446	1.34881	2.87308	10.0993	29.2994	50	80	15	34	59
1747	Male	Flexible Schedule	<40	11.9571	0	7.98917	19.6934	11.7042	8.30591	17.9519	1.02131	2.36401	9.64599	21.6346	28	31	7	12	19
1748	Male	Regular Work Hours	<40	13.6417	4	6.4529	19.9388	13.4859	7.64389	18.7485	2.24848	1.59091	11.1046	22.1154	22	25	5	11	17
1749	Female	Flexible Schedule	40-60	14.5	6	8.88729	23.0933	14.206	9.75766	21.2593	1.14023	1.22588	11.5016	22.9167	1	1	1	1	1
1750	Female	Long Work Hours	40-60	15	7	8.31167	21.07	12.7583	10.1541	20.8823	0.960794	0.603532	10.7283	13.3758	52	83	14	33	56
1751	Male	Regular Work Hours	<40	16.0814	8	7.619	20.9216	13.3026	8.45708	19.5317	0.952063	1.57327	11.0747	36.7568	46	52	12	23	34
1752	Male	Flexible Schedule	<40	15.0026	7	8.36298	22	13.637	9.68286	19.6905	1.52831	2.93933	10.0076	20.8333	24	31	4	10	22
1753	Female	Flexible Schedule	<40	13.6244	4	9.28333	20.3667	11.0833	9.88325	19.309	0.996111	0.641746	9.42579	26.8293	33	48	8	20	32
1754	Female	Flexible Schedule	40-60	14.5942	6	8.03333	19.95	11.9167	9.24454	19.7555	1.06552	1.91752	10.511	11.1842	53	81	15	31	51
1755	Female	Morning Shift	<40	14.25	5	6.79528	20.7732	13.9779	8.91694	20.0149	1.23174	0.761944	11.0979	18.6667	22	42	9	19	33
1756	Male	Flexible Schedule	40-60	14.7083	6	8.94015	20.6937	11.7535	9.62079	19.9748	0.698353	1.45355	10.354	18.4615	39	60	6	21	36
1757	Female	Flexible Schedule	40-60	12.0167	0	5.51267	17.3167	11.804	6.67671	16.2833	1.02006	1.3156	9.60661	20.354	38	64	9	25	45
1758	Male	Flexible Schedule	40-60	11.75	0	7.6525	21.5325	13.88	8.4963	19.0455	0.805256	3.52675	10.5492	25.2427	29	37	5	15	28
1759	Female	Flexible Schedule	<40	13.9681	5	8.19419	20.2803	12.0861	9.70462	18.8796	1.36922	2.17242	9.175	50.9434	31	50	12	25	40
1760	Female	Regular Work Hours	<40	15.2	7	9.09022	21.1167	12.0264	9.93045	19.2489	1.26068	2.23273	9.31846	42.1053	23	27	5	10	19
1761	Male	Flexible Schedule	>60	14.5667	6	8.04821	18.2387	10.1905	8.66677	17.9741	1.04549	0.957906	9.30735	29.0323	21	33	6	14	23
1762	Female	Flexible Schedule	40-60	17.5892	9	11.3604	25.6771	14.3167	12.5503	24.1014	1.60133	2.67423	11.5511	17.6471	28	48	8	20	33
1763	Female	Long Work Hours	40-60	13.7644	4	8.28617	19.0645	10.7783	9.63449	17.8427	2.91119	1.33205	8.20821	21.5385	18	24	7	13	19
1764	Female	Flexible Schedule	40-60	17.2222	9	10.4586	22.4891	12.0305	12.1001	21.7108	2.23041	1.34697	9.61073	42.3077	40	60	10	24	42
1765	Female	Morning Shift	<40	10.7583	0	4.96667	24.7333	19.7667	6.48552	18.3254	2.58575	3.95183	11.8399	44.0678	39	65	12	29	48
1766	Female	Rotating Shift	40-60	14.7478	6	8.70063	20.15	11.4494	10.3122	18.8163	1.71466	1.77021	8.50408	23.9437	34	56	15	30	46
1767	Female	Regular Work Hours	<40	12.5	1	8.5	18.1586	9.65861	9.69411	17.9185	1.11667	0.4055	8.22439	11.5942	18	29	5	11	21
1768	Male	Flexible Schedule	>60	10	0	7.56667	19	11.4333	7.64742	15.3658	0.5765	2.19314	7.71836	26.4368	34	73	17	41	61
1769	Female	Regular Work Hours	40-60	12.95	2	7.43583	20.163	12.7271	9.37936	18.7816	1.07428	2.87647	9.40228	34.0426	14	17	4	8	12
1770	Female	Long Work Hours	40-60	13.0333	2	9.83333	20.1942	10.3608	9.99744	19.7861	1.14724	1.26552	9.78861	9.63455	56	66	13	25	42
1771	Female	Evening Shift	40-60	14.0089	5	6.97822	20.0395	13.0612	10.2173	18.5734	1.97896	1.26792	8.35606	27.027	2	3	1	2	3
1772	Female	Morning Shift	40-60	14.1283	5	9.65294	20.0931	10.4402	10.2754	18.3803	0.876435	1.54419	8.10491	41.9355	28	44	12	26	37
1773	Male	Regular Work Hours	40-60	14.559	6	8.59812	21.9077	13.3095	9.33312	20.2099	1.44032	1.97796	10.8768	18.0851	29	38	8	18	29
1774	Male	Night Shift	<40	16.9669	9	7.25	26.8792	19.6292	8.19958	21.2285	0.779398	4.00606	13.0289	32.7273	17	24	6	11	19
1775	Female	Rotating Shift	<40	17.4406	9	9.09764	23.1003	14.0026	10.7244	21.1304	2.87788	2.05158	10.406	34.1176	29	32	6	13	23
1776	Female	Long Work Hours	40-60	10.5667	0	5.70625	19.8333	14.1271	6.55	18.7153	1.06104	1.25972	12.1653	24.5763	35	52	3	11	29
1777	Male	Flexible Schedule	<40	18.2833	9	13.3192	22.3783	9.05917	14.5377	21.8596	2.01806	0.923611	7.32194	26.8657	22	28	6	13	21
1778	Female	Regular Work Hours	40-60	6.25833	0	4.14292	17.2883	13.1454	4.59319	16.3176	1.52261	1.14592	11.7244	50	5	9	1	4	7
1779	Male	Flexible Schedule	>60	15.7167	8	10.3966	20.086	9.68939	11.6226	19.0886	2.44428	1.12875	7.466	35.5556	4	4	2	3	3
1780	Female	Regular Work Hours	<40	13.5583	4	7.72181	21.6812	13.9594	7.9396	20.6329	0.713016	1.48304	12.6933	16.2791	23	37	7	16	24
1781	Male	Long Work Hours	40-60	13.9994	5	6.88778	21.0462	14.1585	8.33282	19.8153	0.754468	1.21009	11.4825	26.6234	39	62	10	24	42
1782	Female	Regular Work Hours	>60	13.3083	3	5.95061	19.051	13.1004	6.80073	18.7806	1.08094	0.961047	11.9799	15.2174	32	50	6	17	35
1783	Female	Long Work Hours	<40	13.1333	3	6.34347	18.8667	12.5232	8.53481	17.6923	2.48726	2.72667	9.15752	30.5882	30	44	8	20	34
1784	Male	Regular Work Hours	<40	12.9924	2	6.95	19.0353	12.0853	8.40623	17.2192	1.477	1.77976	8.81302	27.027	8	9	3	5	6
1785	Male	Regular Work Hours	40-60	12.5	1	5.73083	18.94	13.2092	6.49483	17.855	1.07299	1.58126	11.3602	18.4874	39	66	12	29	48
1786	Female	Regular Work Hours	40-60	12.6033	1	8.06306	18.6204	10.5574	9.04955	16.4656	1.40791	2.10041	7.41605	19.5652	28	46	6	18	32
1787	Female	Regular Work Hours	40-60	13	2	7.66324	19.5483	11.8851	8.13351	18.5989	0.827381	0.792897	10.4654	16.4557	11	11	2	4	6
1788	Female	Flexible Schedule	<40	12.5644	1	7.54985	18.8103	11.2604	7.8966	18.0701	0.523547	1.30806	10.1735	12.5714	29	49	8	18	29
1789	Female	Regular Work Hours	>60	12.3417	1	6.18843	18.575	12.3866	7.94544	17.5203	2.56426	1.0938	9.57481	25.5556	29	37	5	11	25
1790	Female	Regular Work Hours	40-60	12.05	0	5.35	20.008	14.658	7.52536	17.9067	2.54683	1.23264	10.3813	35.5556	11	21	5	10	17
1791	Male	Regular Work Hours	<40	14.3861	6	8.88473	20.348	11.4633	9.49212	19.8593	0.704306	0.858571	10.3672	33.3333	3	3	2	3	3
1792	Female	Morning Shift	<40	13.2019	3	5.6	19.5	13.9	8.03306	17.792	2.26492	2.23319	9.75897	40.1575	37	50	10	22	37
1793	Female	Regular Work Hours	40-60	17.1333	9	8.62667	19.7994	11.1727	8.94304	19.1761	1.05679	1.36526	10.233	17.2285	65	90	19	40	61
1794	Female	Regular Work Hours	40-60	14.75	6	6.52015	23.9459	17.4257	9.13735	20.9646	3.09665	3.09915	11.8273	17.1875	44	64	11	27	46
1795	Female	Flexible Schedule	40-60	15.2167	7	8.8175	22.55	13.7325	10.4498	21.1721	2.43767	2.1597	10.7223	11.8881	55	87	15	38	64
1796	Female	Flexible Schedule	<40	20.0167	9	5.19	26.9107	21.7207	11.3213	25.6919	4.47452	2.08222	14.3707	19.0476	31	42	9	18	29
1797	Male	Flexible Schedule	<40	20.15	9	13.0667	21.3167	8.25	13.6028	20.8389	0.552778	0.952778	7.23611	42.8571	14	18	4	7	12
1798	Male	Regular Work Hours	<40	15	7	9.475	24.0723	14.5973	10.4893	20.8342	1.00428	3.08989	10.3449	25.7143	11	19	4	10	16
1799	Female	Flexible Schedule	40-60	12.3667	1	6.25894	17.71	11.4511	7.46436	17.0475	0.975299	1.31906	9.58312	26.3941	54	61	12	24	37
1800	Male	Flexible Schedule	<40	18.1833	9	10.8092	22.1859	11.3767	11.7774	20.6707	1.29735	1.59462	8.89329	16.0714	13	21	5	9	13
1801	Female	Regular Work Hours	40-60	12.7083	2	7.67917	22.0133	14.3341	8.11699	19.3645	0.620513	1.82126	11.2475	28.5714	22	31	7	16	25
1802	Male	Regular Work Hours	40-60	12.9667	2	6.29792	19.5417	13.2438	7.67537	17.7633	2.2962	1.80299	10.088	55.5556	6	9	2	3	6
1803	Male	Regular Work Hours	<40	12.6153	1	7.25	17.0672	9.81722	7.91722	15.6676	1.68289	2.67878	7.75036	23.4568	13	16	3	6	10
1804	Male	Flexible Schedule	>60	11.5	0	9.61667	18.2194	8.60278	10.2862	17.3285	0.975429	1.26119	7.04237	44.0789	39	53	8	21	38
1805	Female	Regular Work Hours	40-60	16.08	8	8.58242	21.1971	12.6147	10.0487	20.4648	1.14508	1.15633	10.4161	17.1429	35	47	8	18	30
1806	Female	Flexible Schedule	<40	14.55	6	7.0169	21.4142	14.3973	7.64571	19.76	0.727714	2.21534	12.1143	18.2927	14	15	3	4	7
1807	Male	Flexible Schedule	>60	12.5735	1	8.01667	16.1549	8.13825	8.00306	15.6689	0.281984	0.869563	7.66587	17.5926	33	50	11	23	37
1808	Female	Long Work Hours	40-60	18.4583	9	6.55667	26.0771	19.5204	11.4181	24.0488	5.62083	3.81111	12.6307	21.7742	26	40	7	14	24
1809	Female	Long Work Hours	<40	12.5183	1	6.66456	20.7283	14.0638	8.00787	18.747	2.38866	3.19306	10.7391	38.3562	23	35	7	16	26
1810	Female	Regular Work Hours	40-60	16.225	8	10	21.0827	11.0827	12.9136	20.2706	2.10889	1.93803	7.35692	35.443	35	47	10	24	38
1811	Female	Flexible Schedule	40-60	13.5211	4	8.70839	21.1524	12.4441	9.27836	19.5649	1.23542	2.44664	10.2865	24.5614	31	47	10	22	37
1812	Male	Regular Work Hours	40-60	12.2167	1	5.97	21.3025	15.3325	8.93	18.6167	2.95561	3.01281	9.68667	44.7761	13	17	4	7	11
1813	Male	Regular Work Hours	40-60	13.0153	2	8.50472	20.0114	11.5067	9.84182	18.9385	1.62284	1.83613	9.09665	32.0988	31	36	6	14	23
1814	Male	Flexible Schedule	40-60	15.1692	7	8.0485	24.3693	16.3208	8.93855	21.5168	1.56875	1.56478	12.5783	22.8188	24	42	7	17	29
1815	Female	Rotating Shift	<40	14.3114	6	8.38538	20.5305	12.1451	10.2942	19.0885	2.36182	1.07987	8.79432	20.1923	33	55	14	27	44
1816	Female	Flexible Schedule	40-60	14.3	5	6.88333	19.2833	12.4	7.17174	18.8931	1.30613	1.92773	11.7214	7.27969	85	117	26	53	86
1817	Male	Long Work Hours	<40	16.0167	8	9.175	22.4971	13.3221	10.0912	20.591	2.18765	2.0359	10.4999	12.5	39	53	8	19	32
1818	Female	Flexible Schedule	>60	14.0925	5	7.73119	21.5009	13.7697	9.77141	19.8224	1.45319	2.59403	10.051	26.2712	34	44	9	20	31
1819	Male	Flexible Schedule	40-60	14.6833	6	6.84033	24.3857	17.5453	8.27951	21.9646	1.93425	1.58017	13.6851	31.7647	26	36	6	12	26
1820	Female	Regular Work Hours	40-60	16.1	8	8.25	22.2908	14.0408	8.82597	20.7833	0.713274	1.36786	11.9574	18.75	37	57	12	26	42
1821	Male	Regular Work Hours	<40	13	2	6.83958	19.9825	13.1429	7.3141	18.6449	0.574359	1.53077	11.3308	27.381	18	25	4	10	16
1822	Female	Regular Work Hours	>60	13.3886	3	8.79944	19.755	10.9556	10.0366	19.219	1.38917	0.913761	9.18241	27.551	41	77	15	40	63
1823	Female	Flexible Schedule	40-60	15.55	8	9.98736	20.7733	10.786	10.4781	20.3813	0.913671	0.716587	9.90317	15.4839	61	106	21	45	73
1824	Male	Regular Work Hours	<40	14.2044	5	8.50833	21.1755	12.6672	8.88938	20.0238	0.447361	1.56337	11.1345	19.2771	33	45	11	22	34
1825	Female	Long Work Hours	40-60	13.4333	3	7.73833	20.4979	12.7596	9.30578	19.6783	1.67588	0.930556	10.3726	20.1835	23	31	5	11	20
1826	Female	Regular Work Hours	40-60	14.575	6	9.09208	20.8233	11.7312	9.99306	19.7972	1.10972	1.29449	9.80417	21.4286	45	63	13	30	50
1827	Male	Flexible Schedule	<40	15.8667	8	10.7833	24.0092	13.2258	11.7117	20.9934	0.698333	1.57183	9.28178	35.2273	21	31	6	12	18
1828	Male	Flexible Schedule	<40	18.75	9	8.41522	21.4967	13.0814	11.5618	20.0934	1.665	1.3498	8.53157	18.1818	1	2	1	1	2
1829	Unknown	Morning Shift	40-60	11.9333	0	7.87458	17.0667	9.19208	8.41026	16.441	1.03184	1.23077	8.03077	22.8571	33	52	8	19	36
1830	Male	Regular Work Hours	<40	14.3667	6	7.27696	18.5624	11.2855	9.51051	17.4877	0.689402	1.15115	7.97716	27.2727	5	5	2	3	5
1831	Female	Regular Work Hours	<40	13.9481	5	8.38378	18.1467	9.76289	9.64722	17.1778	0.911472	1.53156	7.53061	31.0345	22	30	7	15	23
1832	Male	Flexible Schedule	40-60	14.7	6	8.98681	19.3083	10.3215	9.85447	18.1805	1.2554	1.44096	8.32604	31.1475	21	31	5	13	24
1833	Male	Long Work Hours	40-60	13.8333	4	9.34944	22.6769	13.3275	10.945	20.4313	1.071	2.07966	9.48635	32.9114	14	14	3	6	9
1834	Female	Regular Work Hours	40-60	14.0767	5	7.40417	20.5711	13.167	8.06226	18.4006	1.06881	1.47875	10.3383	15.625	16	28	3	10	18
1835	Male	Flexible Schedule	>60	16.3686	8	4.2	20.1404	15.9404	5.60422	17.8085	2.4335	2.23247	12.2043	30.8824	14	20	3	6	12
1836	Male	Flexible Schedule	<40	16.0833	8	10.5842	24.8494	14.2653	11.6858	21.0668	0.999848	2.01611	9.38109	43.8849	32	50	12	23	36
1837	Male	Regular Work Hours	40-60	18.9108	9	7.96812	22.9642	14.996	8.9953	21.8285	1.70526	2.27278	12.8332	18.1818	18	29	2	9	19
1838	Male	Regular Work Hours	40-60	11.1667	0	7.06333	18.64	11.5767	8.21811	16.6567	0.8565	1.18333	8.43856	30.6122	17	29	7	15	23
1839	Female	Flexible Schedule	<40	13.5543	4	9.06667	21.2279	12.1612	9.33355	20.3088	0.607897	1.49065	10.9753	22.0472	70	96	16	40	70
1840	Male	Rotating Shift	40-60	13.7462	4	7.77021	23.7343	15.9641	8.5705	20.4131	1.5456	2.73391	11.8426	13.4921	28	45	8	18	32
1841	Male	Regular Work Hours	40-60	12.5333	1	7.67167	20.2333	12.5617	8.29222	17.3702	1.19361	2.10698	9.07802	32.3308	18	25	6	9	15
1842	Female	Regular Work Hours	40-60	13.9167	5	6.95778	20.9511	13.9933	9.05199	19.0685	3.40722	1.41954	10.0165	22.3958	57	88	15	37	66
1843	Male	Regular Work Hours	40-60	16.1	8	9.75604	21.4375	11.6815	11.5426	20.6562	1.3853	1.29475	9.11356	14.7368	34	44	11	22	35
1844	Female	Flexible Schedule	>60	18.0833	9	8.53333	21.1461	12.6128	10.7826	20.1701	2.11671	1.09125	9.38748	15.894	49	94	22	46	74
1845	Female	Long Work Hours	40-60	14.5111	6	9.38815	21.3833	11.9952	10.4892	19.8668	1.09317	1.75556	9.37757	28.5714	29	32	5	10	19
1846	Female	Regular Work Hours	40-60	12.8167	2	7.5625	23.0292	15.4667	8.7369	21.0869	1.64133	1.6119	12.35	22.5225	3	4	2	2	3
1847	Male	Flexible Schedule	<40	16.0833	8	9	21.0167	12.0167	11.2358	20.2402	1.14894	1.1862	9.00444	12.9213	47	78	20	38	60
1848	Female	Flexible Schedule	<40	12.9238	2	8.45578	19.445	10.9892	8.99265	18.3375	0.672906	1.14827	9.34481	22
1849	Male	Regular Work Hours	40-60	15.6122	8	8.14083	18.7921	10.6513	10.3879	18.7297	1.9765	1.63833	8.34189	12.3288	18	27	6	13	20
1850	Male	Regular Work Hours	40-60	14.5833	6	9.16667	20.75	11.5833	11.1215	19.5182	1.09241	1.04993	8.39664	19.8198	28	38	8	18	29
1851	Female	Regular Work Hours	40-60	14.3833	6	9.9	18.6675	8.7675	10.5939	18.0561	0.766667	1.10394	7.46212	21.6783	19	36	5	10	21
1852	Male	Rotating Shift	40-60	13.5	4	8.75403	22.2553	13.5013	9.51258	20.1348	0.951032	1.85397	10.6222	21.3115	19	27	6	11	20
1853	Female	Regular Work Hours	40-60	12.7833	2	6.80518	19.0018	12.1966	8.08963	18.7241	1.94778	0.87625	10.6344	20.8333	22	37	7	17	29
1854	Female	Regular Work Hours	40-60	11.4	0	6.52083	20.8542	14.3333	6.93345	18.8014	0.813889	1.79861	11.8679	31.8681	27	46	6	20	36
1855	Male	Long Work Hours	<40	15	7	8.41056	23.2333	14.8228	10.0009	21.5332	1.81536	1.6095	11.5323	21.6981	32	42	7	15	26
1856	Male	Flexible Schedule	<40	13.0906	3	7.5	22	14.5	8.18008	20.2097	1.55739	2.01161	12.0297	25.8427	22	50	9	25	40
1857	Female	Flexible Schedule	40-60	11.1833	0	8.46407	23.6167	15.1526	9.7696	20.3829	0.947121	2.49563	10.6133	18.705	36	43	9	18	29
1858	Female	Flexible Schedule	<40	13.3667	3	8.96667	18.9167	9.95	9.43077	18.4641	0.729487	0.597436	9.03333	28.0992	63	91	21	39	64
1859	Male	Flexible Schedule	40-60	13	2	6.75	21.571	14.821	7.31239	21.0122	0.961966	1.09013	13.6998	14.433	26	38	6	13	25
1860	Female	Flexible Schedule	40-60	12.8167	2	7.41667	18.35	10.9333	8.80833	16.7929	0.889286	2.10238	7.98452	38.1526	37	49	8	18	31
1861	Female	Flexible Schedule	40-60	14.8464	7	7.51764	21.0047	13.4871	9.93115	18.1026	4.8319	2.62932	8.17147	34.3511	49	70	12	34	56
1862	Female	Flexible Schedule	40-60	15	7	6.80262	23.907	17.1044	8.74875	19.9802	1.36442	3.03961	11.2314	47.4747	28	50	10	23	40
1863	Female	Regular Work Hours	<40	12.8333	2	6.96342	20.3804	13.417	7.82661	18.8776	0.900972	1.87937	11.051	18.9474	30	44	8	18	28
1864	Female	Regular Work Hours	<40	14.5	6	8.26689	20.5	12.2331	9.50843	19.7488	1.46896	1.58859	10.2404	25.8427	24	26	7	14	21
1865	Female	Flexible Schedule	<40	15.0361	7	8.96875	23.9435	14.9748	10.3636	20.9482	0.80303	1.44755	10.5845	25	36	49	9	22	34
1866	Male	Regular Work Hours	<40	13.2917	3	7.41419	24.2558	16.8416	8.10982	19.5312	1.1201	3.86361	11.4214	26.9231	10	10	4	6	8
1867	Female	Flexible Schedule	>60	13.4333	3	7.75	18.8396	11.0896	9.81111	18.2402	1.88951	1.04759	8.42905	31.6667	47	57	14	27	44
1868	Female	Regular Work Hours	<40	14.85	7	8.52333	21.7767	13.2533	9.6094	19.8381	1.45357	1.93462	10.2287	31.5789	31	50	11	23	39
1869	Female	Flexible Schedule	<40	14.6667	6	6.48667	20.9167	14.43	8.16198	20.1329	2.47486	1.17732	11.9709	34.8315	41	60	11	26	46
1870	Male	Regular Work Hours	>60	13.0658	2	8.90299	20.2062	11.3032	9.46944	19.3165	1.1853	2.09757	9.84706	18.6047	41	61	7	19	37
1871	Female	Flexible Schedule	40-60	14.1292	5	8.895	20.4629	11.5679	9.94333	19.288	1.45722	1.90732	9.3447	31.0345	6	18	5	10	15
1872	Male	Long Work Hours	40-60	13.3669	3	8.25333	20.8883	12.635	9.51349	20.15	1.86317	1.12381	10.6365	10.0529	27	42	8	16	26
1873	Female	Flexible Schedule	40-60	15.9014	8	11.9	21.1692	9.26917	12.8377	20.1046	1.00565	1.13852	7.26687	26.6667	39	51	8	19	35
1874	Male	Flexible Schedule	40-60	13.4833	4	7.29147	20.5	13.2085	9.7825	18.651	3.57064	2.29	8.86848	65.9091	25	31	7	14	22
1875	Female	Flexible Schedule	<40	17.4933	9	11.7453	22.3356	10.5904	12.1459	20.8874	0.862842	1.57363	8.74152	28.8889	17	30	8	18	26
1876	Female	Flexible Schedule	40-60	19.8667	9	12.9245	26.5	13.5755	13.1987	22.6759	2.78833	2.00697	9.47717	33.7662	29	78	23	48	66
1877	Female	Regular Work Hours	40-60	11.8167	0	8.25167	18.832	10.5804	9.44142	17.8808	1.12181	2.19003	8.43939	28.8136	18	25	6	11	18
1878	Female	Long Work Hours	40-60	12.8667	2	5.02875	27.8613	22.8326	7.22727	25.2099	2.9938	2.62199	17.9826	26.1364	21	29	3	7	19
1879	Female	Flexible Schedule	40-60	12.62	1	8.22917	21.4143	13.1852	9.41625	17.1545	2.98917	2.72283	7.73822	21.6867	34	50	11	28	42
1880	Female	Flexible Schedule	<40	13.8461	4	7.78338	24.6781	16.8947	8.77875	19.2474	1.34622	3.70394	10.4687	25.4237	11	28	6	12	22
1881	Female	Flexible Schedule	<40	14.976	7	9.08056	23.0629	13.9823	9.99724	21.4344	1.59115	2.89147	11.4371	27.027	35	51	10	25	41
1882	Male	Flexible Schedule	>60	13.2996	3	6.66917	22.225	15.5558	9.06147	19.5056	2.39742	2.94563	10.4441	26.6129	28	44	8	16	31
1883	Female	Regular Work Hours	40-60	14.5343	6	8.59704	20.7662	12.1692	9.86979	18.3258	1.66314	1.25566	8.45603	26.5625	16	23	4	10	17
1884	Female	Regular Work Hours	40-60	14.4833	6	8	21.24	13.24	8.67597	19.3274	0.571131	1.56569	10.6514	20	37	65	15	32	52
1885	Female	Flexible Schedule	<40	14.45	6	9.50989	21.6867	12.1768	9.89402	19.5993	0.610962	2.2253	9.70526	21.3483	26	43	10	21	33
1886	Male	Regular Work Hours	40-60	13.3833	3	7.70913	19.75	12.0409	9.11224	18.5352	1.38776	1.63087	9.42292	17.2414	5	5	1	3	4
1887	Female	Regular Work Hours	<40	14.5833	6	7.05542	22.1142	15.0587	8.42308	21.2782	1.79983	0.975641	12.8551	18.0851	42	57	10	26	42
1888	Male	Regular Work Hours	>60	12.7208	2	7.09	18.7438	11.6538	8.1844	18.151	0.779808	1.02043	9.96665	33.7079	26	43	5	12	27
1889	Female	Regular Work Hours	40-60	12.7	2	7.13333	22.7167	15.5833	7.74792	20.3129	0.80252	1.85393	12.5649	21.0256	29	43	7	16	25
1890	Male	Regular Work Hours	<40	16.55	8	10.3942	21.6989	11.3047	11.5291	20.7986	1.55444	0.892738	9.26954	38.4615	26	29	6	11	19
1891	Female	Regular Work Hours	<40	12.6142	1	6.88382	20.101	13.2172	8.11662	19.4561	1.79343	1.31641	11.3395	25	43	77	20	46	65
1892	Female	Flexible Schedule	40-60	14.5064	6	8.75208	20.7556	12.0035	9.08659	18.992	0.664762	1.74385	9.9054	17.341	54	83	14	34	60
1893	Male	Rotating Shift	40-60	18.4286	9	7.01806	25.3554	18.3373	9.85814	22.0115	4.73927	3.06534	12.1533	34.1176	31	41	5	16	28
1894	Male	Regular Work Hours	<40	15.6867	8	8.16364	22.8974	14.7337	10.3791	20.3159	2.44875	2.60392	9.93686	27.7778	28	38	7	15	27
1895	Male	Regular Work Hours	<40	12.2333	1	7.16	20.7273	13.5673	8.08685	18.6728	1.14951	3.29331	10.5859	29.5238	21	27	3	7	17
1896	Male	Flexible Schedule	>60	14.0707	5	8.89343	19.6351	10.7417	9.90442	18.3176	1.29461	1.77728	8.41319	16.3043	38	53	11	24	40
1897	Male	Regular Work Hours	40-60	13.1333	3	7.4834	20.0292	12.5458	8.03228	19.2927	1.36758	1.08563	11.2604	11.1732	39	50	8	20	34
1898	Female	Flexible Schedule	40-60	13.7042	4	9.31	22.3625	13.0525	11.4667	19.426	2.67961	2.28856	7.95933	39.2157	9	11	3	5	8
1899	Female	Rotating Shift	<40	13.9833	5	8.96839	20.2275	11.2591	10.0143	19.886	0.955952	1.92516	9.87171	20	26	40	9	18	30
1900	Female	Flexible Schedule	40-60	15.3667	7	8.86667	25.375	16.5083	10.7133	19.8879	3.38167	2.05767	9.17461	25.4902	19	29	6	15	24
1901	Female	Flexible Schedule	40-60	16.8	9	9.71667	22.54	12.8233	10.6753	20.1115	1.74449	2.19744	9.4362	29.4574	60	113	28	58	91
1902	Female	Regular Work Hours	<40	15.8333	8	8.6	20.0006	11.4006	9.82795	18.7324	1.42784	1.60842	8.90447	34	38	67	14	29	47
1903	Female	Regular Work Hours	<40	13.3397	3	8.29797	18.7006	10.4026	9.40141	18.0069	1.3955	0.826647	8.60548	36.2319	25	38	6	19	31
1904	Female	Flexible Schedule	40-60	13.3243	3	8.49556	22.5362	14.0407	9.7495	19.8137	1.14063	3.28851	10.0642	20.2381	37	60	14	27	43
1905	Female	Regular Work Hours	<40	12.0558	0	6.20653	21.4126	15.2061	7.6272	18.1634	1.08124	1.33939	10.5362	48.5294	25	35	8	19	29
1906	Male	Flexible Schedule	>60	10.0306	0	5.88125	17.915	12.0338	6.64146	14.8811	1.13803	2.40641	8.23967	23.1884	22	30	6	13	21
1907	Male	Flexible Schedule	40-60	16.3549	8	10.2952	22.4573	12.1622	11.7802	21.3846	1.79833	1.94966	9.60438	21.0145	28	53	10	24	37
1908	Female	Flexible Schedule	<40	13.6333	4	8.70844	21.5259	12.8175	9.47609	20.5372	1.25502	1.86609	11.0612	22.4852	28	53	9	19	34
1909	Male	Flexible Schedule	>60	12.25	1	7.16521	20.9992	13.834	7.69678	19.0625	1.0487	2.32118	11.3658	26.0504	18	23	4	8	13
1910	Female	Flexible Schedule	40-60	16.7833	9	10.5327	22.6483	12.1156	11.9351	21.4026	2.12765	1.51323	9.46754	32.5301	31	49	12	23	38
1911	Male	Regular Work Hours	<40	12.5032	1	6.25764	22.9101	16.6525	7.41449	20.775	1.99525	2.19937	13.3605	20.8333	4	4	1	2	2
1912	Male	Regular Work Hours	40-60	16.1739	8	7.25444	23.0333	15.7789	8.22231	20.6999	1.7225	2.28459	12.4776	19.797	45	66	13	27	45
1913	Female	Regular Work Hours	40-60	13.5058	4	12.0133	19.5011	7.48778	12.9702	18.7633	0.824944	0.849333	5.79311	40.2062	37	58	12	26	44
1914	Female	Regular Work Hours	40-60	12.9386	2	7.91795	20.185	12.267	8.56792	19.4671	0.87254	0.946984	10.8992	24.5455	49	73	15	37	59
1915	Male	Regular Work Hours	<40	13.5	4	8.50625	19.4333	10.9271	9.80672	17.5633	0.534889	1.459	7.75661	20.7921	27	37	9	19	28
1916	Female	Flexible Schedule	40-60	14.0167	5	7.77222	21.1	13.3278	9.06208	18.8707	2.65167	3.33095	9.80863	27.673	46	59	11	24	40
1917	Female	Rotating Shift	<40	14.2833	5	9.3	21.3167	12.0167	10.2816	19.7253	1.42579	0.969236	9.44368	44.0945	41	61	14	29	46
1918	Female	Regular Work Hours	<40	12.7083	2	7.44446	19.4908	12.0464	8.03438	18.6238	0.72344	1.18135	10.5894	27.4194	1	1	1	1	1
1919	Female	Long Work Hours	>60	12.2949	1	9.986	20.2346	10.2486	10.701	18.6812	1.01987	1.5498	7.98023	43.5897	40	54	13	27	44
1920	Male	Regular Work Hours	40-60	12.7833	2	8.07625	19.9737	11.8975	8.79615	19.3667	0.971795	0.619316	10.5705	22.549	18	37	4	12	24
1921	Female	Flexible Schedule	>60	13.7572	4	8.71958	21.5208	12.8013	9.64131	20.2556	1.02955	1.3448	10.6143	24.4898	41	54	9	22	38
1922	Female	Regular Work Hours	40-60	18.0042	9	7.99878	22.015	14.0162	8.63028	19.4904	0.879417	1.28919	10.8602	54.2857	9	14	5	8	10
1923	Female	Regular Work Hours	40-60	15.8667	8	7.9025	22.4537	14.5512	9.61851	21.4177	2.53631	1.46744	11.7992	14.7826	32	46	5	16	34
1924	Female	Long Work Hours	<40	17.4594	9	7.24792	22.5667	15.3187	9.05681	21.7864	1.73704	1.19857	12.7296	18.8776	59	75	12	28	48
1925	Female	Flexible Schedule	40-60	12.7631	2	7.01017	18.6317	11.6215	8.23397	17.2526	2.39154	1.27184	9.01868	26.4368	30	59	15	35	50
1926	Female	Regular Work Hours	40-60	12.3061	1	5.44446	18.5302	13.0857	5.76889	18.0774	0.573909	1.17794	12.3085	8.93855	53	69	11	28	48
1927	Female	Flexible Schedule	<40	16.8	9	9.95	22.9021	12.9521	10.7931	22.5049	1.52359	1.56643	11.7118	12.0968	38	56	13	25	36
1928	Male	Regular Work Hours	40-60	15.1167	7	9.13436	21.5967	12.4623	10.9341	19.9358	1.55463	1.76431	9.00176	42.2222	13	18	3	5	12
1929	Female	Flexible Schedule	40-60	9.66361	0	8	15.9278	7.92778	8.05708	14.6837	0.484944	1.31017	6.62658	28.2353	14	22	3	8	14
1930	Male	Flexible Schedule	<40	11.1333	0	5.2	20.3152	15.1152	6.9349	19.3812	0.800754	2.23063	12.4462	29.3651	30	30	5	15	24
1931	Female	Regular Work Hours	40-60	14.6667	6	8.03706	20.1	12.0629	9.11549	19.0097	1.49265	1.29628	9.89419	45.4545	49	82	15	33	58
1932	Female	Long Work Hours	40-60	18.0314	9	9.07732	21.4266	12.3493	11.0755	19.932	1.84859	1.61889	8.85643	20.7317	19	37	8	18	27
1933	Male	Regular Work Hours	40-60	14.1051	5	10.1624	19.0972	8.93486	11.0554	18.3394	0.828359	0.901414	7.28396	25	14	30	8	18	25
1934	Female	Flexible Schedule	40-60	13.3	3	6.79537	19.3667	12.5713	6.8563	18.5169	1.23368	1.48568	11.6606	9.3617	51	91	13	35	64
1935	Male	Regular Work Hours	40-60	12.2333	1	8.15517	19.1733	11.0182	8.66428	18.1187	1.02225	2.06217	9.45447	24.4898	13	13	3	6	11
1936	Female	Flexible Schedule	<40	12.8833	2	8.23808	19.5613	11.3232	8.67744	18.8159	0.693932	0.525256	10.1384	28.6885	36	47	10	21	35
1937	Female	Flexible Schedule	<40	10.4506	0	6.8925	20.7407	13.8482	7.13139	20.1568	0.722659	1.40575	13.0254	9.61039	56	72	13	25	40
1938	Female	Regular Work Hours	40-60	11.5279	0	7	19.4233	12.4233	8.75972	18.5968	0.89359	1.05921	9.83705	22.7679	45	63	8	23	40
1939	Female	Flexible Schedule	<40	12.3349	1	7.01139	18.2492	11.2378	7.40538	16.9212	0.451667	2.4559	9.51577	22.619	24	27	4	9	15
1940	Female	Regular Work Hours	40-60	12.5656	1	5.56442	19.0346	13.4702	6.78145	18.0448	1.52498	2.10953	11.2634	18.1102	43	72	13	31	55
1941	Female	Flexible Schedule	40-60	13.8833	5	7.81208	22.3042	14.4921	7.39099	19.621	1.33188	2.0281	12.23	11.3636	65	94	16	34	62
1942	Male	Flexible Schedule	>60	8.31875	0	6.89412	19.505	12.6109	7.30286	18.9601	0.374359	2.38335	11.6573	41.6667	22	25	5	10	18
1943	Male	Regular Work Hours	<40	15.5667	8	10.65	21.3167	10.6667	11.4258	19.3561	0.598485	2.19242	7.9303	24.3094	51	57	10	22	39
1944	Female	Regular Work Hours	40-60	16.2708	8	6.79538	24.5973	17.802	8.28365	20.8499	1.95051	3.10791	12.5663	30.4878	24	40	7	17	30
1945	Male	Long Work Hours	40-60	13.4333	3	7.21667	20.6624	13.4458	7.98608	19.9967	0.854194	2.24286	12.0107	46.8254	45	64	12	28	49
1946	Female	Regular Work Hours	40-60	16.4719	8	8.99395	20.2783	11.2844	11.2978	19.3352	1.43072	1.82564	8.0375	16.6667	27	45	11	28	38
1947	Male	Long Work Hours	40-60	16.3847	8	8.42621	22.1392	13.713	9.98343	21.1178	2.59792	1.07589	11.1344	28.7879	51	68	12	30	53
1948	Female	Long Work Hours	40-60	12.6365	1	6.2794	20.1333	13.8539	7.92801	19.8387	1.56786	2.77028	11.9107	15.3226	33	61	13	30	47
1949	Male	Long Work Hours	40-60	14.5	6	9.91494	24.8509	14.9359	11.2793	22.05	1.24477	2.07282	10.7707	26.8657	32	49	13	28	41
1950	Female	Night Shift	40-60	15.1228	7	10.0625	23.1942	13.1317	10.1702	20.0248	2.70136	1.45495	9.85457	11.3636	39	53	14	27	42
1951	Female	Flexible Schedule	40-60	13.3833	3	7.44767	19.184	11.7363	7.95481	18.4011	1.03346	1.73803	10.4463	27.7372	37	44	8	18	32
1952	Female	Morning Shift	<40	14.5833	6	9.25	18.2833	9.03333	10.1458	17.5811	0.755556	0.627269	7.43525	16.2921	51	70	15	31	51
1953	Male	Flexible Schedule	<40	17.2	9	10.0328	23.3272	13.2945	12.7791	22.1193	1.75423	2.04122	9.34026	21.5827	41	56	13	26	42
1954	Female	Flexible Schedule	40-60	12.9167	2	8.40333	21.4733	13.07	9.00238	20.4681	0.833373	2.0552	11.4657	13.6585	71	98	20	44	71
1955	Female	Flexible Schedule	40-60	15.4	7	8.96403	22.6249	13.6608	10.3946	20.173	1.96833	2.5678	9.77841	26.2295	17	25	5	11	19
1956	Male	Regular Work Hours	40-60	13.0167	2	8.49417	18.5333	10.0392	9.76667	18.106	1.69643	0.480952	8.33929	13.9037	41	50	9	20	33
1957	Male	Regular Work Hours	<40	13.3167	3	8.4	23.0637	14.6637	9.36838	19.9126	1.12244	2.36679	10.5442	17.6991	22	37	7	15	25
1958	Male	Regular Work Hours	40-60	12.5569	1	7.93333	19.7321	11.7988	8.59583	20.2681	0.604167	1.20972	11.6722	15.9836	53	79	14	30	53
1959	Female	Flexible Schedule	<40	16.0158	8	12.2581	20.2333	7.97528	13.0249	19.638	1.00774	0.575085	6.61312	45.0704	25	61	12	27	42
1960	Female	Flexible Schedule	>60	12.5178	1	8.02278	20.9833	12.9606	10.192	19.4377	1.39748	2.61128	9.24568	30.3371	29	42	6	16	32
1961	Male	Rotating Shift	40-60	11.6833	0	5.3125	18.6382	13.3257	5.91947	17.4034	0.917137	1.41162	11.4839	21.3592	34	46	9	19	30
1962	Female	Regular Work Hours	40-60	16.6853	9	7.96777	22.8472	14.8794	9.35323	20.9235	2.59413	2.83863	11.5703	20.5357	44	63	14	30	50
1963	Male	Flexible Schedule	>60	13.7917	4	7.65	21.65	14	10.4295	18.0732	1.49722	1.62919	7.64374	34.2105	36	58	9	21	37
1964	Male	Flexible Schedule	40-60	15.4375	7	9.46958	23.5967	14.1271	10.0482	19.1631	1.24399	1.71641	9.11482	21.6216	29	38	7	14	27
1965	Female	Long Work Hours	40-60	12.5049	1	6.79329	21.4504	14.6571	8.52363	19.164	2.22088	2.89211	10.6403	28.3333	33	42	7	18	33
1966	Female	Flexible Schedule	40-60	13.9667	5	7.8	21.8333	14.0333	8.06738	20.3185	0.67004	1.56821	12.2512	19.3146	89	123	18	50	87
1967	Male	Regular Work Hours	<40	16.4167	8	6.90256	27.7667	20.8641	10.6078	22.6347	4.42949	3.61292	12.0269	36	27	28	7	13	18
1968	Female	Long Work Hours	<40	13.8069	4	8.28333	24.4331	16.1497	9.04028	19.402	1.04771	3.76714	10.3618	27.5862	20	26	5	12	17
1969	Male	Long Work Hours	>60	14.8526	7	5.01306	19.1293	14.1162	6.21273	17.3306	2.03229	1.93588	11.1179	38.0435	23	34	9	16	24
1970	Female	Regular Work Hours	<40	13.3333	3	9.4865	20.8333	11.3468	11.3726	20.0656	3.05848	1.20126	8.69306	16.8142	39	59	12	26	46
1971	Female	Regular Work Hours	<40	12.2897	1	6.5091	19.3875	12.8784	7.05705	18.0923	1.00609	1.25562	11.0353	20	31	62	9	25	47
1972	Female	Flexible Schedule	>60	17.5833	9	10.4733	20.4392	9.96583	11.9667	19.7929	2.04053	1.03561	7.82614	35.1351	23	34	6	15	27
1973	Male	Regular Work Hours	<40	13.5	4	5.32917	19.2188	13.8896	5.90504	18.7519	1.20988	0.461885	12.8469	31.5789	11	12	4	6	8
1974	Male	Regular Work Hours	<40	14.2711	5	9.71864	21.3434	11.6248	11.2811	20.3596	2.17383	1.57489	9.07847	30.1887	22	27	7	14	22
1975	Male	Long Work Hours	40-60	14.3	5	7.00964	20.0851	13.0755	7.11438	20.4839	1.14088	1.40782	13.3696	5.4878	52	67	11	24	43
1976	Female	Regular Work Hours	<40	12.65	1	8.01519	18.6275	10.6123	8.41216	18.1723	0.459722	0.93594	9.76017	24.7863	32	44	9	19	32
1977	Female	Rotating Shift	<40	14.375	6	7.48694	22.8466	15.3596	9.95034	21.659	2.26028	1.65558	11.7087	24.026	49	66	14	32	48
1978	Male	Regular Work Hours	40-60	14.2917	5	6.20583	22.2167	16.0108	8.122	21.2964	2.02504	1.29018	13.1744	26.2295	43	69	13	30	52
1979	Male	Regular Work Hours	40-60	13.85	4	11.2462	22.365	11.1188	12.0724	18.9828	1.00961	0.969389	6.91042	42.1053	20	32	8	15	24
1980	Male	Long Work Hours	40-60	12.0758	0	8.3136	19.4587	11.1451	9.7446	18.1119	1.57846	1.78197	8.36735	34.9206	23	33	4	12	21
1981	Female	Flexible Schedule	<40	13.05	2	7.5	21.6	14.1	8.60743	20.5301	1.08255	2.07681	11.9226	24.5283	52	79	20	40	57
1982	Female	Flexible Schedule	40-60	15.1261	7	6.22931	22.0817	15.8524	7.78919	20.0844	1.92067	2.02782	12.2952	28.2609	31	43	6	16	30
1983	Male	Flexible Schedule	40-60	14.2011	5	9.53933	19.7912	10.2518	9.74361	19.384	0.640655	0.778948	9.64042	8.42105	62	89	19	37	58
1984	Female	Flexible Schedule	>60	14.3667	6	8.25333	20.2967	12.0433	9.31395	18.4045	1.37431	1.69526	9.09054	25.7143	55	91	26	50	75
1985	Female	Flexible Schedule	40-60	17.6722	9	7.16667	24.3865	17.2198	11.2638	21.8646	3.00212	2.26379	10.6009	38.1443	46	63	11	27	46
1986	Female	Regular Work Hours	40-60	12.9333	2	9.05	20.0847	11.0347	9.18982	19.1963	0.40877	0.954167	10.0064	15.3061	36	52	8	21	34
1987	Male	Long Work Hours	40-60	15.3083	7	9.16689	23.0593	13.8924	10.4825	21.0147	2.23846	2.29068	10.5322	38.1944	21	35	7	15	24
1988	Male	Regular Work Hours	40-60	12.1833	1	7.40833	17.5833	10.175	8.19167	15.2799	1.40144	0.892389	7.08828	34.4262	22	46	10	25	38
1989	Female	Flexible Schedule	<40	12.4583	1	7.8	20.1588	12.3588	8.78212	17.9869	1.7798	2.09286	9.20478	29.0698	45	54	13	24	36
1990	Female	Regular Work Hours	<40	12.8672	2	7.51667	20.3117	12.795	8.48095	18.5553	1.50476	2.8525	10.0744	30.2817	46	59	12	26	44
1991	Female	Flexible Schedule	<40	13.5	4	8.36285	20	11.6372	8.72867	19.2828	0.75	1.1471	10.5541	16.7742	46	76	16	33	54
1992	Male	Flexible Schedule	40-60	16.1583	8	8.39725	21.624	13.2267	9.06474	20.7149	1.00594	1.49081	11.6501	17.4497	28	42	5	14	26
1993	Male	Long Work Hours	40-60	13.5167	4	8.5	20.2851	11.7851	9.77806	18.6547	1.78688	0.661581	8.8766	38.7755	4	6	2	4	5
1994	Female	Flexible Schedule	40-60	14.7215	6	8.27963	22.8811	14.6015	9.29581	22.2405	1.20498	1.45294	12.9447	21.7391	31	46	9	18	30
1995	Female	Regular Work Hours	40-60	12.3432	1	6.75694	21.4944	14.7375	7.48021	18.995	0.726453	1.90669	11.5148	16.4894	57	92	17	40	71
1996	Female	Flexible Schedule	>60	13	2	6.75	20	13.25	8.84561	17.8118	2.74235	2.38813	8.96621	24.1611	41	65	13	32	48
1997	Female	Morning Shift	<40	14.8186	6	8.76042	22.3183	13.5579	10.1755	20.8113	2.88124	2.05925	10.6359	24.3902	68	108	23	47	80
1998	Female	Long Work Hours	>60	11.4211	0	7.34208	17.8313	10.4892	8.34487	16.4782	0.648718	1.18821	8.13333	22.5806	24	36	6	14	23
[truncated: 19,008 more rows]
